# Supplementary material for: Phosphorylation of MIF by PIP4K2a is necessary for cilia biogenesis
Source: Cell Death Dis. 2023 Dec 5;14(12):795. doi: 10.1038/s41419-023-06323-9 (PMC10698143; doi:10.1038/s41419-023-06323-9)
Supplement: Supplementary file 4 — Data Set 1 [file 41419_2023_6323_MOESM4_ESM.xlsx]

## Sheet: Promoter-TSS-cilia related gene
Data files S1. The potential MIF target genes related to cilia biogenesis identified with ChIP-seq.
PeakID (cmd=annotatePeaks.pl GSE65110_MPan1_vsMinput_peaks.bed.txt hg19 -cpu 8)	Chr	Start	End	Strand	Peak Score	Focus Ratio/Region Size	Annotation	Detailed Annotation	Distance to TSS	Nearest PromoterID	Entrez ID	Nearest Unigene	Nearest Refseq	Nearest Ensembl	Gene Name	Gene Alias	Gene Description	Gene Type
MACS_peak_76739	chr9	98271623	98271803	+	81.25	NA	promoter-TSS (NM_000264)	promoter-TSS (NM_000264)	-882	NM_000264	5727	Hs.494538	NM_000264	ENSG00000185920	PTCH1	BCNS|NBCCS|PTC|PTC1|PTCH	patched 1	protein-coding
MACS_peak_55203	chr4	88928334	88928483	+	50.78	NA	promoter-TSS (NM_000297)	promoter-TSS (NM_000297)	-379	NM_000297	5311	Hs.181272	NM_000297	ENSG00000118762	PKD2	APKD2|PC2|PKD4|Pc-2|TRPP2	polycystin 2, transient receptor potential cation channel	protein-coding
MACS_peak_82341	chrX	38186700	38186874	+	83.65	NA	promoter-TSS (NM_000328)	promoter-TSS (NM_000328)	-25	NM_001367246	6103	Hs.61438	NM_000328	ENSG00000156313	RPGR	COD1|CORDX1|CRD|PCDX|RP15|RP3|XLRP3|orf15	retinitis pigmentosa GTPase regulator	protein-coding
MACS_peak_29792	chr17	2496577	2496793	+	95.07	NA	promoter-TSS (NM_000430)	promoter-TSS (NM_000430)	-263	NM_000430	5048	Hs.77318	NM_000430	ENSG00000007168	PAFAH1B1	LIS1|LIS2|MDCR|MDS|NudF|PAFAH	platelet activating factor acetylhydrolase 1b regulatory subunit 1	protein-coding
MACS_peak_41510	chr2	20189472	20190098	+	283.88	NA	promoter-TSS (NM_001006657)	promoter-TSS (NM_001006657)	81	NM_001006657	57539	Hs.205427	NM_020779	ENSG00000118965	WDR35	CED2|IFT121|IFTA1|SRTD7	WD repeat domain 35	protein-coding
MACS_peak_11393	chr10	111969051	111969288	+	58.4	NA	promoter-TSS (NM_001008541)	promoter-TSS (NM_001008541)	-820	NM_001008541	4601	Hs.602078	NM_005962	ENSG00000119950	MXI1	MAD2|MXD2|MXI|bHLHc11	MAX interactor 1, dimerization protein	protein-coding
MACS_peak_45368	chr20	10415155	10415303	+	57.83	NA	promoter-TSS (NM_001009608)	promoter-TSS (NM_001009608)	-342	NM_170784	8195	Hs.472119	NM_018848	ENSG00000125863	MKKS	BBS6|HMCS|KMS|MKS	McKusick-Kaufman syndrome	protein-coding
MACS_peak_17275	chr12	49960231	49960422	+	56.24	NA	promoter-TSS (NM_001012300)	promoter-TSS (NM_001012300)	-104	NM_001012300	10445	Hs.25313	NM_006337	ENSG00000187778	MCRS1	ICP22BP|INO80Q|MCRS2|MSP58|P78	microspherule protein 1	protein-coding
MACS_peak_66720	chr6	112408272	112408624	+	94.59	NA	promoter-TSS (NM_001033564)	promoter-TSS (NM_001033564)	237	NM_016262	51175	Hs.34851	NM_016262	ENSG00000074935	TUBE1	TUBE|dJ142L7.2	tubulin epsilon 1	protein-coding
MACS_peak_82388	chrX	40943749	40944086	+	149.4	NA	promoter-TSS (NM_001039591)	promoter-TSS (NM_001039591)	-781	NM_001039591	8239	Hs.77578	NM_004652	ENSG00000124486	USP9X	DFFRX|FAF|FAM|MRX99|MRXS99F	ubiquitin specific peptidase 9 X-linked	protein-coding
MACS_peak_82389	chrX	40944200	40944391	+	57.16	NA	promoter-TSS (NM_001039591)	promoter-TSS (NM_001039591)	-403	NM_001039591	8239	Hs.77578	NM_004652	ENSG00000124486	USP9X	DFFRX|FAF|FAM|MRX99|MRXS99F	ubiquitin specific peptidase 9 X-linked	protein-coding
MACS_peak_21140	chr14	88851797	88851940	+	74.19	NA	promoter-TSS (NM_001040428)	promoter-TSS (NM_001040428)	-120	NM_001040428	55812	Hs.525518	NM_018418	ENSG00000042317	SPATA7	HEL-S-296|HSD-3.1|HSD3|LCA3	spermatogenesis associated 7	protein-coding
MACS_peak_9556	chr1	243419175	243419703	+	273.9	NA	promoter-TSS (NM_001042405)	promoter-TSS (NM_001042405)	96	NM_006642	10806	Hs.591530	NM_006642	ENSG00000054282	SDCCAG8	BBS16|CCCAP|CCCAP SLSN7|HSPC085|NPHP10|NY-CO-8|SLSN7|hCCCAP	serologically defined colon cancer antigen 8	protein-coding
MACS_peak_65034	chr6	3157671	3157806	+	55.52	NA	promoter-TSS (NM_001069)	promoter-TSS (NM_001069)	40	NM_001310315	7280	Hs.654543	NM_001069	ENSG00000137267	TUBB2A	CDCBM5|TUBB|TUBB2	tubulin beta 2A class IIa	protein-coding
MACS_peak_44628	chr2	219124939	219125128	+	57.99	NA	promoter-TSS (NM_001077191)	promoter-TSS (NM_001077191)	-705	NM_170699	151306	Hs.160954	NM_170699	ENSG00000179921	GPBAR1	BG37|GPCR19|GPR131|M-BAR|TGR5	G protein-coupled bile acid receptor 1	protein-coding
MACS_peak_44629	chr2	219125656	219125895	+	57.92	NA	promoter-TSS (NM_001077191)	promoter-TSS (NM_001077191)	37	NM_001077194	151306	Hs.160954	NM_170699	ENSG00000179921	GPBAR1	BG37|GPCR19|GPR131|M-BAR|TGR5	G protein-coupled bile acid receptor 1	protein-coding
MACS_peak_47265	chr20	57465792	57465977	+	101.55	NA	promoter-TSS (NM_001077489)	promoter-TSS (NM_001077489)	-592	NM_000516	2778	Hs.125898	NM_000516	ENSG00000087460	GNAS	AHO|C20orf45|GNAS1|GPSA|GSA|GSP|NESP|PITA3|POH|SCG6|SgVI	GNAS complex locus	protein-coding
MACS_peak_47264	chr20	57465455	57465677	+	73.29	NA	promoter-TSS (NM_001077489)	promoter-TSS (NM_001077489)	-910	NM_000516	2778	Hs.125898	NM_000516	ENSG00000087460	GNAS	AHO|C20orf45|GNAS1|GPSA|GSA|GSP|NESP|PITA3|POH|SCG6|SgVI	GNAS complex locus	protein-coding
MACS_peak_76738	chr9	98270185	98270478	+	109.59	NA	promoter-TSS (NM_001083604)	promoter-TSS (NM_001083604)	-9	NM_001083605	5727	Hs.494538	NM_000264	ENSG00000185920	PTCH1	BCNS|NBCCS|PTC|PTC1|PTCH	patched 1	protein-coding
MACS_peak_76737	chr9	98269273	98269896	+	209.78	NA	promoter-TSS (NM_001083607)	promoter-TSS (NM_001083607)	-103	NM_001083607	5727	Hs.494538	NM_000264	ENSG00000185920	PTCH1	BCNS|NBCCS|PTC|PTC1|PTCH	patched 1	protein-coding
MACS_peak_61354	chr5	61601461	61601965	+	194.94	NA	promoter-TSS (NM_001098511)	promoter-TSS (NM_001098511)	-276	NM_001243952	3796	Hs.558351	NM_004520	ENSG00000068796	KIF2A	CDCBM3|HK2|KIF2	kinesin family member 2A	protein-coding
MACS_peak_61353	chr5	61600896	61601135	+	63.78	NA	promoter-TSS (NM_001098511)	promoter-TSS (NM_001098511)	-974	NM_001243952	3796	Hs.558351	NM_004520	ENSG00000068796	KIF2A	CDCBM3|HK2|KIF2	kinesin family member 2A	protein-coding
MACS_peak_76468	chr9	80850868	80851218	+	131.71	NA	promoter-TSS (NM_001098802)	promoter-TSS (NM_001098802)	52	NM_001330694	84131	Hs.187621	NM_032171	ENSG00000148019	CEP78	C9orf81|CRDHL|IP63	centrosomal protein 78	protein-coding
MACS_peak_2232	chr1	21044647	21044811	+	52.58	NA	promoter-TSS (NM_001122819)	promoter-TSS (NM_001122819)	-229	NM_020816	57576	Hs.130411	NM_020816	ENSG00000117245	KIF17	KIF17B|KIF3X|KLP-2|OSM-3	kinesin family member 17	protein-coding
MACS_peak_2231	chr1	21044501	21044631	+	50.37	NA	promoter-TSS (NM_001122819)	promoter-TSS (NM_001122819)	-66	NM_020816	57576	Hs.130411	NM_020816	ENSG00000117245	KIF17	KIF17B|KIF3X|KLP-2|OSM-3	kinesin family member 17	protein-coding
MACS_peak_43156	chr2	110962485	110962674	+	77.84	NA	promoter-TSS (NM_001128178)	promoter-TSS (NM_001128178)	11	NM_207181	4867	Hs.280388	NM_000272	ENSG00000144061	NPHP1	JBTS4|NPH1|SLSN1	nephrocystin 1	protein-coding
MACS_peak_82198	chrX	13753154	13753432	+	122.18	NA	promoter-TSS (NM_001128835)	promoter-TSS (NM_001128835)	426	NM_003611	8481	Hs.6483	NM_003611	ENSG00000046651	OFD1	71-7A|CXorf5|JBTS10|RP23|SGBS2	OFD1 centriole and centriolar satellite protein	protein-coding
MACS_peak_8372	chr1	205744454	205744690	+	67.9	NA	promoter-TSS (NM_001135663)	promoter-TSS (NM_001135663)	38	NM_001135662	8934	Hs.115325	NM_003929	ENSG00000117280	RAB29	RAB7L|RAB7L1	RAB29, member RAS oncogene family	protein-coding
MACS_peak_25588	chr16	524813	524973	+	51.76	NA	promoter-TSS (NM_001142272)	promoter-TSS (NM_001142272)	-31	NM_001142272	9727	Hs.531642	NM_014700	ENSG00000090565	RAB11FIP3	CART1|FIP3-Rab11|Rab11-FIP3	RAB11 family interacting protein 3	protein-coding
MACS_peak_73320	chr8	94766973	94767362	+	164.92	NA	promoter-TSS (NM_001142301)	promoter-TSS (NM_001142301)	45	NR_024522	91147	Hs.116240	NM_153704	ENSG00000164953	TMEM67	JBTS6|MECKELIN|MKS3|NPHP11|TNEM67	transmembrane protein 67	protein-coding
MACS_peak_11080	chr10	97453897	97454052	+	55.45	NA	promoter-TSS (NM_001143973)	promoter-TSS (NM_001143973)	-74	NM_001143973	26123	Hs.438991	NM_015631	ENSG00000119977	TCTN3	C10orf61|JBTS18|OFD4|TECT3	tectonic family member 3	protein-coding
MACS_peak_54586	chr4	13485802	13485999	+	61.71	NA	promoter-TSS (NM_001159601)	promoter-TSS (NM_001159601)	64	NM_004249	9364	Hs.656060	NM_004249	ENSG00000157869	RAB28	CORD18	RAB28, member RAS oncogene family	protein-coding
MACS_peak_16166	chr12	2999655	3000082	+	138.56	NA	promoter-TSS (NM_001160408)	promoter-TSS (NM_001160408)	-189	NM_003324	7289	Hs.655333	NM_003324	ENSG00000078246	TULP3	TUBL3	TUB like protein 3	protein-coding
MACS_peak_9246	chr1	231762225	231762539	+	106.56	NA	promoter-TSS (NM_001164540)	promoter-TSS (NM_001164540)	-154	NM_001164541	27185	Hs.13318	NM_018662	ENSG00000162946	DISC1	C1orf136|SCZD9	DISC1 scaffold protein	protein-coding
MACS_peak_9245	chr1	231761823	231762089	+	75.68	NA	promoter-TSS (NM_001164540)	promoter-TSS (NM_001164540)	-580	NM_001164541	27185	Hs.13318	NM_018662	ENSG00000162946	DISC1	C1orf136|SCZD9	DISC1 scaffold protein	protein-coding
MACS_peak_5035	chr1	85156194	85156758	+	195.6	NA	promoter-TSS (NM_001166295)	promoter-TSS (NM_001166295)	-325	NM_001166295	117178	Hs.22587	NM_014021	ENSG00000117155	SSX2IP	ADIP|hMsd1	SSX family member 2 interacting protein	protein-coding
MACS_peak_54177	chr3	196438819	196439131	+	109.78	NA	promoter-TSS (NM_001166304)	promoter-TSS (NM_001166304)	146	NM_032898	84984	Hs.282800	NM_032898	ENSG00000174007	CEP19	C3orf34|MOSPGF	centrosomal protein 19	protein-coding
MACS_peak_54176	chr3	196438346	196438516	+	50.78	NA	promoter-TSS (NM_001166304)	promoter-TSS (NM_001166304)	690	NM_032898	84984	Hs.282800	NM_032898	ENSG00000174007	CEP19	C3orf34|MOSPGF	centrosomal protein 19	protein-coding
MACS_peak_52134	chr3	50283512	50283845	+	106.94	NA	promoter-TSS (NM_001166425)	promoter-TSS (NM_001166425)	-664	NM_001166425	2771	Hs.77269	NM_002070	ENSG00000114353	GNAI2	GIP|GNAI2B|H_LUCA15.1|H_LUCA16.1	G protein subunit alpha i2	protein-coding
MACS_peak_18031	chr12	57853062	57853456	+	123.75	NA	promoter-TSS (NM_001167609)	promoter-TSS (NM_001167609)	-309	NM_005269	2735	Hs.632702	NM_005269	ENSG00000111087	GLI1	GLI|PAPA8|PPD1	GLI family zinc finger 1	protein-coding
MACS_peak_13383	chr11	61159116	61159270	+	61.49	NA	promoter-TSS (NM_001173991)	promoter-TSS (NM_001173991)	-639	NM_001330285	51259	Hs.26745	NM_016499	ENSG00000187049	TMEM216	HSPC244	transmembrane protein 216	protein-coding
MACS_peak_75878	chr9	34458433	34459068	+	254.95	NA	promoter-TSS (NM_001184941)	promoter-TSS (NM_001184941)	0	NM_001281428	27019	Hs.112667	NM_012144	ENSG00000122735	DNAI1	CILD1|DIC1|ICS1|PCD	dynein axonemal intermediate chain 1	protein-coding
MACS_peak_61217	chr5	54522822	54523406	+	206.19	NA	promoter-TSS (NM_001190787)	promoter-TSS (NM_001190787)	29	NM_001190787	345643	Hs.394578	NM_001190787	ENSG00000234602	MCIDAS	IDAS|MCI|MCIN	multiciliate differentiation and DNA synthesis associated cell cycle protein	protein-coding
MACS_peak_55493	chr4	128801787	128802124	+	142.22	NA	promoter-TSS (NM_001190801)	promoter-TSS (NM_001190801)	-93	NM_014264	10733	Hs.172052	NM_014264	ENSG00000142731	PLK4	MCCRP2|SAK|STK18	polo like kinase 4	protein-coding
MACS_peak_22698	chr15	49103163	49103774	+	216.31	NA	promoter-TSS (NM_001194998)	promoter-TSS (NM_001194998)	-202	NM_014985	22995	Hs.443005	NM_014985	ENSG00000103995	CEP152	MCPH4|MCPH9|SCKL5	centrosomal protein 152	protein-coding
MACS_peak_11431	chr10	112678582	112678796	+	82.7	NA	promoter-TSS (NM_001195306)	promoter-TSS (NM_001195306)	5	NM_001195306	92482	Hs.232543	NM_001195304	ENSG00000214413	BBIP1	BBIP10|BBS18|NCRNA00081|bA348N5.3	BBSome interacting protein 1	protein-coding
MACS_peak_53559	chr3	158288953	158289117	+	52.58	NA	promoter-TSS (NM_001195433)	promoter-TSS (NM_001195433)	52	NM_001130157	4291	Hs.85195	NM_022443	ENSG00000178053	MLF1	-	myeloid leukemia factor 1	protein-coding
MACS_peak_29458	chr16	89987471	89987617	+	51.74	NA	promoter-TSS (NM_001197181)	promoter-TSS (NM_001197181)	-789	NM_001197181	10381	Hs.511743	NM_006086	ENSG00000258947	TUBB3	CDCBM|CDCBM1|CFEOM3|CFEOM3A|FEOM3|TUBB4|beta-4	tubulin beta 3 class III	protein-coding
MACS_peak_23728	chr15	71184349	71185230	+	190.57	NA	promoter-TSS (NM_001199017)	promoter-TSS (NM_001199017)	7	NM_001199017	54839	Hs.12692	NM_017691	ENSG00000137821	LRRC49	PGs4	leucine rich repeat containing 49	protein-coding
MACS_peak_42312	chr2	63815243	63815937	+	282.91	NA	promoter-TSS (NM_001199112)	promoter-TSS (NM_001199112)	21	NR_148704	51057	Hs.414952	NM_015910	ENSG00000143951	WDPCP	BBS15|C2orf86|CHDTHP|CPLANE5|FRITZ|FRTZ	WD repeat containing planar cell polarity effector	protein-coding
MACS_peak_42289	chr2	62081066	62081512	+	207.34	NA	promoter-TSS (NM_001201543)	promoter-TSS (NM_001201543)	-94	NM_032180	84140	Hs.440466	NM_032180	ENSG00000170264	FAM161A	RP28	FAM161 centrosomal protein A	protein-coding
MACS_peak_42290	chr2	62081966	62082203	+	67.58	NA	promoter-TSS (NM_001201543)	promoter-TSS (NM_001201543)	-889	NM_032180	84140	Hs.440466	NM_032180	ENSG00000170264	FAM161A	RP28	FAM161 centrosomal protein A	protein-coding
MACS_peak_23288	chr15	66161373	66162044	+	368.56	NA	promoter-TSS (NM_001206836)	promoter-TSS (NM_001206836)	-121	NM_001206836	8766	Hs.321541	NM_004663	ENSG00000103769	RAB11A	YL8	RAB11A, member RAS oncogene family	protein-coding
MACS_peak_21021	chr14	76452049	76452270	+	87.1	NA	promoter-TSS (NM_001255995)	promoter-TSS (NM_001255995)	53	NM_001255995	112752	Hs.532626	NM_052873	ENSG00000119650	IFT43	C14orf179|CED3|RP81|SRTD18	intraflagellar transport 43	protein-coding
MACS_peak_73425	chr8	99837719	99837889	+	57.2	NA	promoter-TSS (NM_001256313)	promoter-TSS (NM_001256313)	95	NM_001256313	6788	Hs.492333	NM_006281	ENSG00000104375	STK3	KRS1|MST2	serine/threonine kinase 3	protein-coding
MACS_peak_65187	chr6	13328978	13329140	+	59.83	NA	promoter-TSS (NM_001258457)	promoter-TSS (NM_001258457)	-244	NM_001318805	51256	Hs.484678	NM_016495	ENSG00000145979	TBC1D7	MGCPH|PIG51|TBC7	TBC1 domain family member 7	protein-coding
MACS_peak_7338	chr1	168106370	168106793	+	151.8	NA	promoter-TSS (NM_001267612)	promoter-TSS (NM_001267612)	230	NM_001267611	23432	Hs.271809	NM_007369	ENSG00000143147	GPR161	RE2	G protein-coupled receptor 161	protein-coding
MACS_peak_31239	chr17	26662135	26662802	+	332.92	NA	promoter-TSS (NM_001267778)	promoter-TSS (NM_001267778)	30	NM_001267776	90410	Hs.705431	NM_174887	ENSG00000109083	IFT20	-	intraflagellar transport 20	protein-coding
MACS_peak_66116	chr6	43044482	43044644	+	59.83	NA	promoter-TSS (NM_001270398)	promoter-TSS (NM_001270398)	11	NM_001270398	5754	Hs.90572	NM_002821	ENSG00000112655	PTK7	CCK-4|CCK4	protein tyrosine kinase 7 (inactive)	protein-coding
MACS_peak_48675	chr21	45759107	45759637	+	210.22	NA	promoter-TSS (NM_001271440)	promoter-TSS (NM_001271440)	-99	NM_001271441	755	Hs.517331	NM_004928	ENSG00000160226	CFAP410	C21orf2|LRRC76|RDMS|SMDAX|YF5/A2	cilia and flagella associated protein 410	protein-coding
MACS_peak_21377	chr14	102771353	102771837	+	170.05	NA	promoter-TSS (NM_001272011)	promoter-TSS (NM_001272011)	-94	NR_148554	5891	Hs.36859	NM_014226	ENSG00000080823	MOK	RAGE|RAGE-1|RAGE1|STK30	MOK protein kinase	protein-coding
MACS_peak_4851	chr1	67389850	67390128	+	74.76	NA	promoter-TSS (NM_001278215)	promoter-TSS (NM_001278215)	550	NM_024763	79819	Hs.49421	NM_024763	ENSG00000152763	WDR78	DIC4	WD repeat domain 78	protein-coding
MACS_peak_66308	chr6	57086187	57086414	+	65.37	NA	promoter-TSS (NM_001278668)	promoter-TSS (NM_001278668)	-41	NM_001278668	51715	Hs.555016	NM_016277	ENSG00000112210	RAB23	HSPC137	RAB23, member RAS oncogene family	protein-coding
MACS_peak_66309	chr6	57086424	57086609	+	58.98	NA	promoter-TSS (NM_001278668)	promoter-TSS (NM_001278668)	-257	NM_001278668	51715	Hs.555016	NM_016277	ENSG00000112210	RAB23	HSPC137	RAB23, member RAS oncogene family	protein-coding
MACS_peak_51481	chr3	39149129	39149503	+	127.91	NA	promoter-TSS (NM_001278789)	promoter-TSS (NM_001278789)	145	NM_001366899	199223	Hs.443935	NM_145755	ENSG00000168026	TTC21A	IFT139A|SPGF37|STI2	tetratricopeptide repeat domain 21A	protein-coding
MACS_peak_53145	chr3	129158818	129159491	+	220.64	NA	promoter-TSS (NM_001280541)	promoter-TSS (NM_001280541)	87	NM_018262	55764	Hs.655284	NM_018262	ENSG00000163913	IFT122	CED|CED1|SPG|WDR10|WDR10p|WDR140	intraflagellar transport 122	protein-coding
MACS_peak_75400	chr9	3526141	3527025	+	481.59	NA	promoter-TSS (NM_001282116)	promoter-TSS (NM_001282116)	-582	NM_001282116	5991	Hs.136829	NM_002919	ENSG00000080298	RFX3	-	regulatory factor X3	protein-coding
MACS_peak_52125	chr3	50273117	50273503	+	108.63	NA	promoter-TSS (NM_001282618)	promoter-TSS (NM_001282618)	-326	NM_002070	2771	Hs.77269	NM_002070	ENSG00000114353	GNAI2	GIP|GNAI2B|H_LUCA15.1|H_LUCA16.1	G protein subunit alpha i2	protein-coding
MACS_peak_52124	chr3	50272683	50272889	+	65.99	NA	promoter-TSS (NM_001282618)	promoter-TSS (NM_001282618)	-850	NM_002070	2771	Hs.77269	NM_002070	ENSG00000114353	GNAI2	GIP|GNAI2B|H_LUCA15.1|H_LUCA16.1	G protein subunit alpha i2	protein-coding
MACS_peak_52121	chr3	50263543	50264007	+	184.2	NA	promoter-TSS (NM_001282620)	promoter-TSS (NM_001282620)	-725	NM_001282619	2771	Hs.77269	NM_002070	ENSG00000114353	GNAI2	GIP|GNAI2B|H_LUCA15.1|H_LUCA16.1	G protein subunit alpha i2	protein-coding
MACS_peak_42207	chr2	55746276	55746515	+	116.01	NA	promoter-TSS (NM_001282761)	promoter-TSS (NM_001282761)	-336	NM_080667	112942	Hs.264208	NM_080667	ENSG00000163001	CFAP36	BARTL1|CCDC104	cilia and flagella associated protein 36	protein-coding
MACS_peak_42208	chr2	55746551	55746737	+	78.95	NA	promoter-TSS (NM_001282761)	promoter-TSS (NM_001282761)	-87	NM_080667	112942	Hs.264208	NM_080667	ENSG00000163001	CFAP36	BARTL1|CCDC104	cilia and flagella associated protein 36	protein-coding
MACS_peak_10065	chr10	24754412	24754679	+	98.25	NA	promoter-TSS (NM_001282770)	promoter-TSS (NM_001282770)	-915	NM_001282770	56243	Hs.445885	NM_019590	ENSG00000120549	KIAA1217	ETL4|SKT	KIAA1217	protein-coding
MACS_peak_71472	chr7	123172928	123173163	+	82.24	NA	promoter-TSS (NM_001282855)	promoter-TSS (NM_001282855)	-43	NM_001321293	154865	Hs.159650	NM_178827	ENSG00000164675	IQUB	-	IQ motif and ubiquitin domain containing	protein-coding
MACS_peak_4325	chr1	47779562	47780212	+	171.49	NA	promoter-TSS (NM_001282938)	promoter-TSS (NM_001282938)	-68	NM_001282937	6491	Hs.525198	NM_003035	ENSG00000123473	STIL	MCPH7|SIL	STIL centriolar assembly protein	protein-coding
MACS_peak_45061	chr2	232645856	232646479	+	310.88	NA	promoter-TSS (NM_001282949)	promoter-TSS (NM_001282949)	-130	NM_001291018	5147	Hs.516808	NM_002601	ENSG00000156973	PDE6D	JBTS22|PDED	phosphodiesterase 6D	protein-coding
MACS_peak_22875	chr15	56657233	56657945	+	272.54	NA	promoter-TSS (NM_001286449)	promoter-TSS (NM_001286449)	-33	NM_198524	374618	Hs.511476	NM_198524	ENSG00000151575	TEX9	-	testis expressed 9	protein-coding
MACS_peak_15378	chr11	73881670	73882639	+	471.93	NA	promoter-TSS (NM_001286577)	promoter-TSS (NM_001286577)	-90	NM_001286577	26005	Hs.557938	NM_015531	ENSG00000168014	C2CD3	OFD14	C2 domain containing 3 centriole elongation regulator	protein-coding
MACS_peak_69177	chr7	50518000	50518184	+	52.95	NA	promoter-TSS (NM_001287495)	promoter-TSS (NM_001287495)	12	NM_001287493	63979	Hs.137516	NM_022116	ENSG00000132436	FIGNL1	-	fidgetin like 1	protein-coding
MACS_peak_67756	chr7	2598310	2598748	+	147.67	NA	promoter-TSS (NM_001287502)	promoter-TSS (NM_001287502)	-77	NM_001287501	23288	Hs.520627	NM_152558	ENSG00000106012	IQCE	1700028P05Rik|PAPA7	IQ motif containing E	protein-coding
MACS_peak_38081	chr19	11545783	11546015	+	83.25	NA	promoter-TSS (NM_001289102)	promoter-TSS (NM_001289102)	43	NM_001302454	115948	Hs.124010	NM_145045	ENSG00000198003	CCDC151	CILD30	coiled-coil domain containing 151	protein-coding
MACS_peak_4256	chr1	46663152	46663463	+	75.64	NA	promoter-TSS (NM_001290130)	promoter-TSS (NM_001290130)	-136	NM_001290129	55624	Hs.525134	NM_017739	ENSG00000085998	POMGNT1	GNTI.2|GnT I.2|LGMD2O|LGMDR15|MEB|MGAT1.2|RP76|gnT-I.2	protein O-linked mannose N-acetylglucosaminyltransferase 1 (beta 1,2-)	protein-coding
MACS_peak_616	chr1	6052244	6052593	+	151.87	NA	promoter-TSS (NM_001291594)	promoter-TSS (NM_001291594)	67	NM_015102	261734	Hs.462348	NM_015102	ENSG00000131697	NPHP4	POC10|SLSN4	nephrocystin 4	protein-coding
MACS_peak_65584	chr6	30688478	30688609	+	50.03	NA	promoter-TSS (NM_001293212).3	promoter-TSS (NM_001293212).3	414	NM_001293213	203068	Hs.636480	NM_178014	ENSG00000196230	TUBB	CDCBM6|CSCSC1|M40|OK/SW-cl.56|TUBB1|TUBB5	tubulin beta class I	protein-coding
MACS_peak_62693	chr5	132072972	132073510	+	221.12	NA	promoter-TSS (NM_001300792)	promoter-TSS (NM_001300792)	-3	NM_007054	11127	Hs.43670	NM_007054	ENSG00000131437	KIF3A	FLA10|KLP-20	kinesin family member 3A	protein-coding
MACS_peak_55525	chr4	130014530	130014678	+	50.47	NA	promoter-TSS (NM_001300897)	promoter-TSS (NM_001300897)	90	NM_001300898	132320	Hs.654690	NM_144643	ENSG00000151466	SCLT1	CAP-1A|CAP1A	sodium channel and clathrin linker 1	protein-coding
MACS_peak_3406	chr1	32666056	32666537	+	198.35	NA	promoter-TSS (NM_001301011)	promoter-TSS (NM_001301011)	100	NM_001301011	79140	Hs.534482	NM_024296	ENSG00000160050	CCDC28B	-	coiled-coil domain containing 28B	protein-coding
MACS_peak_30267	chr17	7620634	7620823	+	50.66	NA	promoter-TSS (NM_001303270)	promoter-TSS (NM_001303270)	-334	NM_020877	146754	Hs.367649	NM_020877	ENSG00000183914	DNAH2	DNAHC2|DNHD3	dynein axonemal heavy chain 2	protein-coding
MACS_peak_38556	chr19	14219641	14219942	+	94.38	NA	promoter-TSS (NM_001304349)	promoter-TSS (NM_001304349)	-589	NM_001304349	5566	Hs.631630	NM_002730	ENSG00000072062	PRKACA	PKACA|PPNAD4	protein kinase cAMP-activated catalytic subunit alpha	protein-coding
MACS_peak_20668	chr14	58894252	58894555	+	141.24	NA	promoter-TSS (NM_001304487)	promoter-TSS (NM_001304487)	-34	NM_001329946	9786	Hs.232532	NM_014749	ENSG00000100578	KIAA0586	JBTS23|SRTD14|Talpid3	KIAA0586	protein-coding
MACS_peak_52181	chr3	50382997	50383701	+	213.3	NA	promoter-TSS (NM_001308379)	promoter-TSS (NM_001308379)	-186	NM_001308379	51364	Hs.526735	NM_015896	ENSG00000004838	ZMYND10	BLU|CILD22|DNAAF7|FLU	zinc finger MYND-type containing 10	protein-coding
MACS_peak_77179	chr9	123836648	123837846	+	442.52	NA	promoter-TSS (NM_001317163)	promoter-TSS (NM_001317163)	14	NM_001369893	11064	Hs.653263	NM_007018	ENSG00000119397	CNTRL	CEP1|CEP110|FAN|bA165P4.1	centriolin	protein-coding
MACS_peak_71866	chr7	138818208	138818626	+	137.53	NA	promoter-TSS (NM_001318333)	promoter-TSS (NM_001318333)	-73	NM_001144920	79989	Hs.133020	NM_024926	ENSG00000105948	TTC26	DYF13|IFT56|dyf-13	tetratricopeptide repeat domain 26	protein-coding
MACS_peak_76846	chr9	102861347	102861741	+	207.19	NA	promoter-TSS (NM_001318382)	promoter-TSS (NM_001318382)	19	NM_014425	27130	Hs.558477	NM_014425	ENSG00000119509	INVS	INV|NPH2|NPHP2	inversin	protein-coding
MACS_peak_26508	chr16	4363619	4363947	+	127.28	NA	promoter-TSS (NM_001318918)	promoter-TSS (NM_001318918)	-979	NM_001318918	84662	Hs.592087	NM_032575	ENSG00000126603	GLIS2	NKL|NPHP7	GLIS family zinc finger 2	protein-coding
MACS_peak_35422	chr17	79197212	79197372	+	56.45	NA	promoter-TSS (NM_001319228)	promoter-TSS (NM_001319228)	-527	NM_001009811	22994	Hs.514578	NM_014984	ENSG00000141577	CEP131	AZ1|AZI1|ZA1	centrosomal protein 131	protein-coding
MACS_peak_18652	chr12	111051729	111052142	+	177.03	NA	promoter-TSS (NM_001319682)	promoter-TSS (NM_001319682)	1	NM_001082537	79600	Hs.211511	NM_024549	ENSG00000204852	TCTN1	JBTS13|TECT1	tectonic family member 1	protein-coding
MACS_peak_7838	chr1	200639179	200639608	+	222.78	NA	promoter-TSS (NM_001320181)	promoter-TSS (NM_001320181)	-267	NM_001349804	83479	Hs.497332	NM_031306	ENSG00000118197	DDX59	OFD5|ZNHIT5	DEAD-box helicase 59	protein-coding
MACS_peak_7354	chr1	169337019	169337352	+	108.36	NA	promoter-TSS (NM_001320973)	promoter-TSS (NM_001320973)	16	NR_104229	29922	Hs.706952	NM_013330	ENSG00000143156	NME7	CFAP67|MN23H7|NDK 7|NDK7|nm23-H7	NME/NM23 family member 7	protein-coding
MACS_peak_30982	chr17	19265977	19266476	+	183.99	NA	promoter-TSS (NM_001321215)	promoter-TSS (NM_001321215)	-175	NM_001243473	27077	Hs.309467	NM_015681	ENSG00000108641	B9D1	B9|EPPB9|JBTS27|MKS9|MKSR-1|MKSR1	B9 domain containing 1	protein-coding
MACS_peak_30983	chr17	19266478	19266822	+	103.84	NA	promoter-TSS (NM_001321215)	promoter-TSS (NM_001321215)	-599	NM_001243473	27077	Hs.309467	NM_015681	ENSG00000108641	B9D1	B9|EPPB9|JBTS27|MKS9|MKSR-1|MKSR1	B9 domain containing 1	protein-coding
MACS_peak_33678	chr17	56296280	56296803	+	178.78	NA	promoter-TSS (NM_001321268)	promoter-TSS (NM_001321268)	75	NM_001321268	54903	Hs.408843	NM_017777	ENSG00000011143	MKS1	BBS13|JBTS28|MES|MKS|POC12	MKS transition zone complex subunit 1	protein-coding
MACS_peak_73976	chr8	133687806	133688037	+	51.63	NA	promoter-TSS (NM_001321961)	promoter-TSS (NM_001321961)	-130	NR_135911	23639	Hs.591865	NM_012472	ENSG00000129295	LRRC6	CILD19|LRTP|TSLRP	leucine rich repeat containing 6	protein-coding
MACS_peak_19623	chr13	73355886	73356435	+	239.75	NA	promoter-TSS (NM_001322349)	promoter-TSS (NM_001322349)	-111	NM_006346	10464	Hs.441926	NM_006346	ENSG00000083535	PIBF1	C13orf24|CEP90|JBTS33|PIBF	progesterone immunomodulatory binding factor 1	protein-coding
MACS_peak_82239	chrX	18443436	18443586	+	50.46	NA	promoter-TSS (NM_001323289)	promoter-TSS (NM_001323289)	-214	NM_003159	6792	Hs.659851	NM_003159	ENSG00000008086	CDKL5	CFAP247|EIEE2|ISSX|STK9	cyclin dependent kinase like 5	protein-coding
MACS_peak_26757	chr16	10837583	10838043	+	215.56	NA	promoter-TSS (NM_001323594)	promoter-TSS (NM_001323594)	87	NM_001323597	4682	Hs.81469	NM_002484	ENSG00000103274	NUBP1	CIAO5|NBP|NBP1|NBP35	nucleotide binding protein 1	protein-coding
MACS_peak_20990	chr14	75593419	75593985	+	313.62	NA	promoter-TSS (NM_001329238)	promoter-TSS (NM_001329238)	49	NM_001329238	91754	Hs.7200	NM_033116	ENSG00000119638	NEK9	APUG|LCCS10|NC|NERCC|NERCC1	NIMA related kinase 9	protein-coding
MACS_peak_26390	chr16	3550781	3551268	+	211.18	NA	promoter-TSS (NM_001330454)	promoter-TSS (NM_001330454)	20	NM_001330454	23059	Hs.155995	NM_015041	ENSG00000103351	CLUAP1	CFAP22|FAP22|IFT38	clusterin associated protein 1	protein-coding
MACS_peak_52861	chr3	113234039	113234275	+	95.56	NA	promoter-TSS (NM_001331078)	promoter-TSS (NM_001331078)	-154	NM_144718	152185	Hs.477144	NM_144718	ENSG00000163611	SPICE1	CCDC52|SPICE	spindle and centriole associated protein 1	protein-coding
MACS_peak_52860	chr3	113233717	113234021	+	128.72	NA	promoter-TSS (NM_001331079)	promoter-TSS (NM_001331079)	134	NM_001331078	152185	Hs.477144	NM_144718	ENSG00000163611	SPICE1	CCDC52|SPICE	spindle and centriole associated protein 1	protein-coding
MACS_peak_52859	chr3	113233496	113233693	+	51.77	NA	promoter-TSS (NM_001331079)	promoter-TSS (NM_001331079)	97	NM_001331079	152185	Hs.477144	NM_144718	ENSG00000163611	SPICE1	CCDC52|SPICE	spindle and centriole associated protein 1	protein-coding
MACS_peak_39467	chr19	36545939	36546126	+	58.37	NA	promoter-TSS (NM_001331102)	promoter-TSS (NM_001331102)	233	NM_001083961	284403	Hs.116244	NM_173636	ENSG00000075702	WDR62	C19orf14|MCPH2	WD repeat domain 62	protein-coding
MACS_peak_9555	chr1	243418548	243419043	+	210.7	NA	promoter-TSS (NM_001350247)	promoter-TSS (NM_001350247)	-87	NM_001042404	9859	Hs.533635	NM_014812	ENSG00000143702	CEP170	FAM68A|KAB|KIAA0470	centrosomal protein 170	protein-coding
MACS_peak_9554	chr1	243418262	243418502	+	58.95	NA	promoter-TSS (NM_001350247)	promoter-TSS (NM_001350247)	201	NM_014812	9859	Hs.533635	NM_014812	ENSG00000143702	CEP170	FAM68A|KAB|KIAA0470	centrosomal protein 170	protein-coding
MACS_peak_30784	chr17	17876101	17876497	+	133.67	NA	promoter-TSS (NM_001350332)	promoter-TSS (NM_001350332)	123	NM_031294	83450	Hs.579264	NM_031294	ENSG00000171962	DRC3	CFAP134|LRRC48	dynein regulatory complex subunit 3	protein-coding
MACS_peak_72065	chr7	158649152	158649338	+	71.97	NA	promoter-TSS (NM_001350915)	promoter-TSS (NM_001350915)	-4	NM_001350916	55112	Hs.389945	NM_018051	ENSG00000126870	WDR60	FAP163|SRPS6|SRTD8	WD repeat domain 60	protein-coding
MACS_peak_72343	chr8	17779948	17780471	+	287.3	NA	promoter-TSS (NM_001352638)	promoter-TSS (NM_001352638)	-157	NM_001315508	5108	Hs.491148	NM_006197	ENSG00000078674	PCM1	PTC4|RET/PCM-1	pericentriolar material 1	protein-coding
MACS_peak_52481	chr3	56590926	56591133	+	68.35	NA	promoter-TSS (NM_001353149)	promoter-TSS (NM_001353149)	-155	NM_001353154	285331	Hs.476399	NM_001012506	ENSG00000180376	CCDC66	-	coiled-coil domain containing 66	protein-coding
MACS_peak_30685	chr17	17140874	17141094	+	60.32	NA	promoter-TSS (NM_001353229)	promoter-TSS (NM_001353229)	-502	NM_001353231	201163	Hs.31652	NM_144606	ENSG00000154803	FLCN	BHD|DENND8B|FLCL	folliculin	protein-coding
MACS_peak_30684	chr17	17140337	17140541	+	59.04	NA	promoter-TSS (NM_001353229)	promoter-TSS (NM_001353229)	43	NM_001353229	201163	Hs.31652	NM_144606	ENSG00000154803	FLCN	BHD|DENND8B|FLCL	folliculin	protein-coding
MACS_peak_62813	chr5	133561609	133562618	+	492.35	NA	promoter-TSS (NM_001355019)	promoter-TSS (NM_001355019)	-349	NM_002715	5515	Hs.105818	NM_002715	ENSG00000113575	PPP2CA	NEDLBA|PP2Ac|PP2CA|PP2Calpha|RP-C	protein phosphatase 2 catalytic subunit alpha	protein-coding
MACS_peak_62812	chr5	133561039	133561543	+	181.85	NA	promoter-TSS (NM_001355019)	promoter-TSS (NM_001355019)	-46	NR_149151	5515	Hs.105818	NM_002715	ENSG00000113575	PPP2CA	NEDLBA|PP2Ac|PP2CA|PP2Calpha|RP-C	protein phosphatase 2 catalytic subunit alpha	protein-coding
MACS_peak_18955	chr12	122111048	122111340	+	91.23	NA	promoter-TSS (NM_001363685)	promoter-TSS (NM_001363685)	-644	NM_001363685	283385	Hs.434154	NM_173855	ENSG00000139714	MORN3	-	MORN repeat containing 3	protein-coding
MACS_peak_28453	chr16	53737614	53737817	+	76.98	NA	promoter-TSS (NM_001363988)	promoter-TSS (NM_001363988)	56	NM_001328422	23322	Hs.298382	NM_015272	ENSG00000103494	RPGRIP1L	CORS3|FTM|JBTS7|MKS5|NPHP8|PPP1R134	RPGRIP1 like	protein-coding
MACS_peak_40631	chr19	48824981	48825453	+	189.89	NA	promoter-TSS (NM_001364171)	promoter-TSS (NM_001364171)	11	NM_001364171	93233	Hs.112645	NM_144577	ENSG00000105479	CCDC114	CILD20	coiled-coil domain containing 114	protein-coding
MACS_peak_73068	chr8	67976361	67976778	+	188.16	NA	promoter-TSS (NM_001364869)	promoter-TSS (NM_001364869)	-34	NM_024790	79848	Hs.370147	NM_024790	ENSG00000104218	CSPP1	CSPP|JBTS21	centrosome and spindle pole associated protein 1	protein-coding
MACS_peak_42204	chr2	55646805	55647254	+	182.41	NA	promoter-TSS (NM_001365480)	promoter-TSS (NM_001365480)	-37	NM_001365480	55704	Hs.292925	NM_018084	ENSG00000115355	CCDC88A	APE|GIRDIN|GIV|GRDN|HkRP1|KIAA1212|PEHO|PEHOL	coiled-coil domain containing 88A	protein-coding
MACS_peak_50836	chr3	9850853	9851644	+	134.67	NA	promoter-TSS (NM_001366051)	promoter-TSS (NM_001366051)	-351	NM_001025930	26140	Hs.726435	NM_015644	ENSG00000214021	TTLL3	HOTTL	tubulin tyrosine ligase like 3	protein-coding
MACS_peak_21146	chr14	89290767	89291064	+	148.18	NA	promoter-TSS (NM_001366536)	promoter-TSS (NM_001366536)	-80	NR_159362	123016	Hs.303055	NM_144596	ENSG00000165533	TTC8	BBS8|RP51	tetratricopeptide repeat domain 8	protein-coding
MACS_peak_18280	chr12	88535564	88536235	+	321.11	NA	promoter-TSS (NM_001366583)	promoter-TSS (NM_001366583)	94	NM_025114	80184	Hs.150444	NM_025114	ENSG00000198707	CEP290	3H11Ag|BBS14|CT87|JBTS5|LCA10|MKS4|NPHP6|POC3|SLSN6|rd16	centrosomal protein 290	protein-coding
MACS_peak_45501	chr20	30467325	30467658	+	90.25	NA	promoter-TSS (NM_001367620)	promoter-TSS (NM_001367620)	-129	NR_160277	164395	Hs.712915	NM_001008409	ENSG00000131044	TTLL9	C20orf125	tubulin tyrosine ligase like 9	protein-coding
MACS_peak_66784	chr6	121655513	121655817	+	99.19	NA	promoter-TSS (NM_001367760)	promoter-TSS (NM_001367760)	-39	NM_152730	221322	Hs.121396	NM_152730	ENSG00000146350	TBC1D32	BROMI|C6orf170|C6orf171	TBC1 domain family member 32	protein-coding
MACS_peak_66785	chr6	121655871	121656026	+	67.92	NA	promoter-TSS (NM_001367760)	promoter-TSS (NM_001367760)	-73	NM_001367759	221322	Hs.121396	NM_152730	ENSG00000146350	TBC1D32	BROMI|C6orf170|C6orf171	TBC1 domain family member 32	protein-coding
MACS_peak_39445	chr19	36248802	36249350	+	250.93	NA	promoter-TSS (NM_001367856)	promoter-TSS (NM_001367856)	-1	NM_001367856	148137	Hs.527982	NM_144692	ENSG00000167595	PROSER3	C19orf55	proline and serine rich 3	protein-coding
MACS_peak_30987	chr17	19280895	19281922	+	505.11	NA	promoter-TSS (NM_001368769)	promoter-TSS (NM_001368769)	-182	NM_001368769	27077	Hs.309467	NM_015681	ENSG00000108641	B9D1	B9|EPPB9|JBTS27|MKS9|MKSR-1|MKSR1	B9 domain containing 1	protein-coding
MACS_peak_77180	chr9	123883874	123884178	+	85.8	NA	promoter-TSS (NM_001369892)	promoter-TSS (NM_001369892)	-22	NM_001369892	11064	Hs.653263	NM_007018	ENSG00000119397	CNTRL	CEP1|CEP110|FAN|bA165P4.1	centriolin	protein-coding
MACS_peak_42593	chr2	84743488	84743675	+	71.62	NA	promoter-TSS (NM_001370)	promoter-TSS (NM_001370)	2	NM_001370	1768	Hs.249972	NM_001370	ENSG00000115423	DNAH6	DNHL1|Dnahc6|HL-2|HL2	dynein axonemal heavy chain 6	protein-coding
MACS_peak_32607	chr17	41475498	41475729	+	64.57	NA	promoter-TSS (NM_001661)	promoter-TSS (NM_001661)	-748	NM_001661	379	Hs.183153	NM_001661	ENSG00000175906	ARL4D	ARF4L|ARL6	ADP ribosylation factor like GTPase 4D	protein-coding
MACS_peak_32606	chr17	41475286	41475476	+	50.51	NA	promoter-TSS (NM_001661)	promoter-TSS (NM_001661)	-980	NM_001661	379	Hs.183153	NM_001661	ENSG00000175906	ARL4D	ARF4L|ARL6	ADP ribosylation factor like GTPase 4D	protein-coding
MACS_peak_18817	chr12	118573785	118574079	+	102.49	NA	promoter-TSS (NM_002567)	promoter-TSS (NM_002567)	3	NM_002567	5037	Hs.433863	NM_002567	ENSG00000089220	PEBP1	HCNP|HCNPpp|HEL-210|HEL-S-34|HEL-S-96|PBP|PEBP|PEBP-1|RKIP	phosphatidylethanolamine binding protein 1	protein-coding
MACS_peak_38560	chr19	14228596	14228817	+	78.35	NA	promoter-TSS (NM_002730)	promoter-TSS (NM_002730)	-132	NM_002730	5566	Hs.631630	NM_002730	ENSG00000072062	PRKACA	PKACA|PPNAD4	protein kinase cAMP-activated catalytic subunit alpha	protein-coding
MACS_peak_38561	chr19	14229247	14229428	+	69.5	NA	promoter-TSS (NM_002730)	promoter-TSS (NM_002730)	-763	NM_002730	5566	Hs.631630	NM_002730	ENSG00000072062	PRKACA	PKACA|PPNAD4	protein kinase cAMP-activated catalytic subunit alpha	protein-coding
MACS_peak_34272	chr17	66508139	66508840	+	231.57	NA	promoter-TSS (NM_002734)	promoter-TSS (NM_002734)	-31	NM_001276289	5573	Hs.280342	NM_002734	ENSG00000108946	PRKAR1A	ACRDYS1|ADOHR|CAR|CNC|CNC1|PKR1|PPNAD1|PRKAR1|TSE1	protein kinase cAMP-dependent type I regulatory subunit alpha	protein-coding
MACS_peak_52380	chr3	52804839	52805276	+	169.85	NA	promoter-TSS (NM_003157)	promoter-TSS (NM_003157)	-92	NM_001193533	6787	Hs.631921	NM_003157	ENSG00000114904	NEK4	NRK2|STK2|pp12301	NIMA related kinase 4	protein-coding
MACS_peak_81763	chr9	140082641	140083752	+	646.2	NA	promoter-TSS (NM_003731)	promoter-TSS (NM_003731)	68	NM_003731	8636	Hs.530314	NM_003731	ENSG00000176101	SSNA1	N14|NA-14|NA14	SS nuclear autoantigen 1	protein-coding
MACS_peak_51901	chr3	48885097	48885394	+	109.4	NA	promoter-TSS (NM_004157)	promoter-TSS (NM_004157)	62	NM_004157	5576	Hs.631923	NM_004157	ENSG00000114302	PRKAR2A	PKR2|PRKAR2	protein kinase cAMP-dependent type II regulatory subunit alpha	protein-coding
MACS_peak_21208	chr14	92505972	92506801	+	357.71	NA	promoter-TSS (NM_004239)	promoter-TSS (NM_004239)	17	NM_001321851	9321	Hs.632339	NM_004239	ENSG00000100815	TRIP11	ACG1A|CEV14|GMAP-210|GMAP210|ODCD|TRIP-11|TRIP230	thyroid hormone receptor interactor 11	protein-coding
MACS_peak_27602	chr16	23689869	23690496	+	237.37	NA	promoter-TSS (NM_005030)	promoter-TSS (NM_005030)	-28	NM_005030	5347	Hs.592049	NM_005030	ENSG00000166851	PLK1	PLK|STPK13	polo like kinase 1	protein-coding
MACS_peak_27601	chr16	23689627	23689805	+	64.98	NA	promoter-TSS (NM_005030)	promoter-TSS (NM_005030)	-494	NM_005030	5347	Hs.592049	NM_005030	ENSG00000166851	PLK1	PLK|STPK13	polo like kinase 1	protein-coding
MACS_peak_27600	chr16	23689390	23689560	+	55.15	NA	promoter-TSS (NM_005030)	promoter-TSS (NM_005030)	-735	NM_005030	5347	Hs.592049	NM_005030	ENSG00000166851	PLK1	PLK|STPK13	polo like kinase 1	protein-coding
MACS_peak_15142	chr11	70244278	70244779	+	137.58	NA	promoter-TSS (NM_005231)	promoter-TSS (NM_005231)	-84	NM_138565	2017	Hs.596164	NM_005231	ENSG00000085733	CTTN	EMS1	cortactin	protein-coding
MACS_peak_38827	chr19	16222017	16222730	+	295.85	NA	promoter-TSS (NM_005370)	promoter-TSS (NM_005370)	-326	NM_005370	4218	Hs.642874	NM_005370	ENSG00000167461	RAB8A	MEL|RAB8	RAB8A, member RAS oncogene family	protein-coding
MACS_peak_70433	chr7	91569859	91570283	+	147.98	NA	promoter-TSS (NM_005751)	promoter-TSS (NM_005751)	-105	NM_147185	10142	Hs.651221	NM_005751	ENSG00000127914	AKAP9	AKAP-9|AKAP350|AKAP450|CG-NAP|HYPERION|LQT11|MU-RMS-40.16A|PPP1R45|PRKA9|YOTIAO	A-kinase anchoring protein 9	protein-coding
MACS_peak_18768	chr12	115121812	115122422	+	222.54	NA	promoter-TSS (NM_005996)	promoter-TSS (NM_005996)	-137	NM_005996	6926	Hs.744016	NM_005996	ENSG00000135111	TBX3	TBX3-ISO|UMS|XHL	T-box transcription factor 3	protein-coding
MACS_peak_44760	chr2	220118321	220118968	+	197.97	NA	promoter-TSS (NM_006000)	promoter-TSS (NM_006000)	-4	NM_006000	7277	Hs.75318	NM_006000	ENSG00000127824	TUBA4A	ALS22|H2-ALPHA|TUBA1	tubulin alpha 4a	protein-coding
MACS_peak_29459	chr16	89989654	89989822	+	51.37	NA	promoter-TSS (NM_006086)	promoter-TSS (NM_006086)	-12	NM_006086	10381	Hs.511743	NM_006086	ENSG00000258947	TUBB3	CDCBM|CDCBM1|CFEOM3|CFEOM3A|FEOM3|TUBB4|beta-4	tubulin beta 3 class III	protein-coding
MACS_peak_17277	chr12	49961553	49962209	+	275.41	NA	promoter-TSS (NM_006337)	promoter-TSS (NM_006337)	44	NM_006337	10445	Hs.25313	NM_006337	ENSG00000187778	MCRS1	ICP22BP|INO80Q|MCRS2|MSP58|P78	microspherule protein 1	protein-coding
MACS_peak_5493	chr1	110090694	110091660	+	511.46	NA	promoter-TSS (NM_006496)	promoter-TSS (NM_006496)	-60	NM_006496	2773	Hs.73799	NM_006496	ENSG00000065135	GNAI3	87U6|ARCND1	G protein subunit alpha i3	protein-coding
MACS_peak_82443	chrX	46696186	46696719	+	202.17	NA	promoter-TSS (NM_006915)	promoter-TSS (NM_006915)	-26	NM_006915	6102	Hs.44766	NM_006915	ENSG00000102218	RP2	DELXp11.3|NM23-H10|NME10|TBCCD2|XRP2	RP2 activator of ARL3 GTPase	protein-coding
MACS_peak_21015	chr14	76127087	76127862	+	357.85	NA	promoter-TSS (NM_007176)	promoter-TSS (NM_007176)	-115	NM_015072	23093	Hs.709609	NM_015072	ENSG00000119685	TTLL5	CORD19|KIAA0998|STAMP	tubulin tyrosine ligase like 5	protein-coding
MACS_peak_45780	chr20	34042830	34043374	+	256.21	NA	promoter-TSS (NM_007186)	promoter-TSS (NM_007186)	-317	NM_007186	11190	Hs.443976	NM_007186	ENSG00000126001	CEP250	C-NAP1|CEP2|CNAP1|CRDHL2	centrosomal protein 250	protein-coding
MACS_peak_43735	chr2	169104297	169104457	+	60.51	NA	promoter-TSS (NM_013233)	promoter-TSS (NM_013233)	-272	NM_013233	27347	Hs.276271	NM_013233	ENSG00000198648	STK39	DCHT|PASK|SPAK	serine/threonine kinase 39	protein-coding
MACS_peak_50230	chr22	46067538	46067975	+	139.22	NA	promoter-TSS (NM_013236)	promoter-TSS (NM_013236)	42	NM_013236	25814	Hs.475125	NM_013236	ENSG00000130638	ATXN10	E46L|HUMEEP|SCA10	ataxin 10	protein-coding
MACS_peak_41014	chr19	52692637	52692958	+	113.42	NA	promoter-TSS (NM_014225)	promoter-TSS (NM_014225)	-508	NR_033500	5518	Hs.467192	NM_014225	ENSG00000105568	PPP2R1A	MRD36|PP2A-Aalpha|PP2AA|PP2AAALPHA|PR65A	protein phosphatase 2 scaffold subunit Aalpha	protein-coding
MACS_peak_53196	chr3	130466374	130466620	+	78.67	NA	promoter-TSS (NM_014602)	promoter-TSS (NM_014602)	-824	NM_014602	30849	Hs.149032	NM_014602	ENSG00000196455	PIK3R4	VPS15|p150	phosphoinositide-3-kinase regulatory subunit 4	protein-coding
MACS_peak_1925	chr1	17247622	17248191	+	107.6	NA	promoter-TSS (NM_014675)	promoter-TSS (NM_014675)	-520	NM_014675	9696	Hs.309403	NM_014675	ENSG00000058453	CROCC	ROLT|TAX1BP2	ciliary rootlet coiled-coil, rootletin	protein-coding
MACS_peak_25576	chr16	475207	475674	+	164.17	NA	promoter-TSS (NM_014700)	promoter-TSS (NM_014700)	-209	NM_014700	9727	Hs.531642	NM_014700	ENSG00000090565	RAB11FIP3	CART1|FIP3-Rab11|Rab11-FIP3	RAB11 family interacting protein 3	protein-coding
MACS_peak_25575	chr16	474733	474971	+	72.26	NA	promoter-TSS (NM_014700)	promoter-TSS (NM_014700)	-797	NM_014700	9727	Hs.531642	NM_014700	ENSG00000090565	RAB11FIP3	CART1|FIP3-Rab11|Rab11-FIP3	RAB11 family interacting protein 3	protein-coding
MACS_peak_25851	chr16	1661753	1662248	+	250.75	NA	promoter-TSS (NM_014714)	promoter-TSS (NM_014714)	73	NM_014714	9742	Hs.389438	NM_014714	ENSG00000187535	IFT140	MZSDS|RP80|SRTD9|WDTC2|c305C8.4|c380F5.1|gs114	intraflagellar transport 140	protein-coding
MACS_peak_7531	chr1	179923367	179923982	+	259.38	NA	promoter-TSS (NM_014810)	promoter-TSS (NM_014810)	-271	NM_014810	9857	Hs.413045	NM_014810	ENSG00000135837	CEP350	CAP350|GM133	centrosomal protein 350	protein-coding
MACS_peak_66458	chr6	84937228	84937728	+	198.03	NA	promoter-TSS (NM_014895)	promoter-TSS (NM_014895)	-117	NM_001286206	22832	Hs.485865	NM_014895	ENSG00000135315	CEP162	C6orf84|KIAA1009|QN1	centrosomal protein 162	protein-coding
MACS_peak_66266	chr6	52926639	52926905	+	98.6	NA	promoter-TSS (NM_014920)	promoter-TSS (NM_014920)	-150	NM_014920	22858	Hs.417022	NM_014920	ENSG00000112144	ICK	ECO|EJM10|LCK2|MRK	intestinal cell kinase	protein-coding
MACS_peak_66265	chr6	52926483	52926624	+	67.57	NA	promoter-TSS (NM_014920)	promoter-TSS (NM_014920)	47	NM_016513	22858	Hs.417022	NM_014920	ENSG00000112144	ICK	ECO|EJM10|LCK2|MRK	intestinal cell kinase	protein-coding
MACS_peak_4954	chr1	78225423	78225751	+	98.19	NA	promoter-TSS (NM_015017)	promoter-TSS (NM_015017)	-23	NM_015017	23032	Hs.480597	NM_015017	ENSG00000077254	USP33	VDU1	ubiquitin specific peptidase 33	protein-coding
MACS_peak_76847	chr9	102862001	102862246	+	92.32	NA	promoter-TSS (NM_015051)	promoter-TSS (NM_015051)	598	NM_014425	27130	Hs.558477	NM_014425	ENSG00000119509	INVS	INV|NPH2|NPHP2	inversin	protein-coding
MACS_peak_45338	chr20	3762223	3762370	+	51.42	NA	promoter-TSS (NM_015417)	promoter-TSS (NM_015417)	-201	NM_015417	25876	Hs.72620	NM_015417	ENSG00000101222	SPEF1	C20orf28|CLAMP|SPEF1A	sperm flagellar 1	protein-coding
MACS_peak_52298	chr3	52188217	52188959	+	302.84	NA	promoter-TSS (NM_015426)	promoter-TSS (NM_015426)	-149	NM_001161581	25886	Hs.476306	NM_015426	ENSG00000164087	POC1A	PIX2|SOFT|WDR51A	POC1 centriolar protein A	protein-coding
MACS_peak_11079	chr10	97453530	97453707	+	68.27	NA	promoter-TSS (NM_015631)	promoter-TSS (NM_015631)	66	NM_015631	26123	Hs.438991	NM_015631	ENSG00000119977	TCTN3	C10orf61|JBTS18|OFD4|TECT3	tectonic family member 3	protein-coding
MACS_peak_16777	chr12	27090618	27092072	+	729.56	NA	promoter-TSS (NM_015633)	promoter-TSS (NM_015633)	40	NM_001171888	26127	Hs.591162	NM_015633	ENSG00000111790	FGFR1OP2	HSPC123-like|WIT3.0	FGFR1 oncogene partner 2	protein-coding
MACS_peak_41724	chr2	27712539	27712736	+	74.19	NA	promoter-TSS (NM_015662)	promoter-TSS (NM_015662)	-27	NM_015662	26160	Hs.127401	NM_015662	ENSG00000138002	IFT172	BBS20|NPHP17|RP71|SLB|SRTD10|osm-1|wim	intraflagellar transport 172	protein-coding
MACS_peak_66310	chr6	57086920	57087319	+	154.13	NA	promoter-TSS (NM_016277)	promoter-TSS (NM_016277)	-7	NM_001278667	51715	Hs.555016	NM_016277	ENSG00000112210	RAB23	HSPC137	RAB23, member RAS oncogene family	protein-coding
MACS_peak_8628	chr1	214776191	214776999	+	360.42	NA	promoter-TSS (NM_016343)	promoter-TSS (NM_016343)	57	NM_016343	1063	Hs.497741	NM_016343	ENSG00000117724	CENPF	CENF|CILD31|PRO1779|STROMS|hcp-1	centromere protein F	protein-coding
MACS_peak_65186	chr6	13328447	13328974	+	218.41	NA	promoter-TSS (NM_016495)	promoter-TSS (NM_016495)	59	NM_016495	51256	Hs.484678	NM_016495	ENSG00000145979	TBC1D7	MGCPH|PIG51|TBC7	TBC1 domain family member 7	protein-coding
MACS_peak_13384	chr11	61159713	61160175	+	173.39	NA	promoter-TSS (NM_016499)	promoter-TSS (NM_016499)	79	NM_016499	51259	Hs.26745	NM_016499	ENSG00000187049	TMEM216	HSPC244	transmembrane protein 216	protein-coding
MACS_peak_18150	chr12	68726167	68726560	+	129.2	NA	promoter-TSS (NM_017440)	promoter-TSS (NM_017440)	-169	NM_001354974	56890	Hs.655702	NM_017440	ENSG00000111554	MDM1	-	Mdm1 nuclear protein	protein-coding
MACS_peak_67441	chr7	765974	766132	+	63.8	NA	promoter-TSS (NM_017802)	promoter-TSS (NM_017802)	-283	NM_017802	54919	Hs.535896	NM_017802	ENSG00000164818	DNAAF5	CILD18|HEATR2	dynein axonemal assembly factor 5	protein-coding
MACS_peak_558	chr1	3566461	3566813	+	122.99	NA	promoter-TSS (NM_017818)	promoter-TSS (NM_017818)	30	NM_017818	49856	Hs.31714	NM_017818	ENSG00000116213	WRAP73	WDR8	WD repeat containing, antisense to TP73	protein-coding
MACS_peak_66257	chr6	52284863	52285319	+	151.03	NA	promoter-TSS (NM_018100)	promoter-TSS (NM_018100)	-49	NM_018100	114327	Hs.403171	NM_018100	ENSG00000096093	EFHC1	EJM1|dJ304B14.2	EF-hand domain containing 1	protein-coding
MACS_peak_20500	chr14	50102197	50102357	+	60.51	NA	promoter-TSS (NM_018139)	promoter-TSS (NM_018139)	-329	NM_018139	55172	Hs.231761	NM_018139	ENSG00000165506	DNAAF2	C14orf104|CILD10|KTU|PF13	dynein axonemal assembly factor 2	protein-coding
MACS_peak_20499	chr14	50101907	50102073	+	58.49	NA	promoter-TSS (NM_018139)	promoter-TSS (NM_018139)	-42	NM_018139	55172	Hs.231761	NM_018139	ENSG00000165506	DNAAF2	C14orf104|CILD10|KTU|PF13	dynein axonemal assembly factor 2	protein-coding
MACS_peak_55447	chr4	122791269	122791865	+	315.27	NA	promoter-TSS (NM_018190)	promoter-TSS (NM_018190)	62	NM_176824	55212	Hs.591694	NM_018190	ENSG00000138686	BBS7	BBS2L1	Bardet-Biedl syndrome 7	protein-coding
MACS_peak_12680	chr11	43380311	43380755	+	186.42	NA	promoter-TSS (NM_018259)	promoter-TSS (NM_018259)	63	NM_018259	55761	Hs.191186	NM_018259	ENSG00000052841	TTC17	-	tetratricopeptide repeat domain 17	protein-coding
MACS_peak_22876	chr15	56757134	56757432	+	86.36	NA	promoter-TSS (NM_018365)	promoter-TSS (NM_018365)	52	NM_018365	55329	Hs.444483	NM_018365	ENSG00000138587	MNS1	SPATA40	meiosis specific nuclear structural 1	protein-coding
MACS_peak_22877	chr15	56757438	56757618	+	60.8	NA	promoter-TSS (NM_018365)	promoter-TSS (NM_018365)	-193	NM_018365	55329	Hs.444483	NM_018365	ENSG00000138587	MNS1	SPATA40	meiosis specific nuclear structural 1	protein-coding
MACS_peak_19383	chr13	25497314	25497480	+	72.29	NA	promoter-TSS (NM_018451)	promoter-TSS (NM_018451)	-398	NR_047595	55835	Hs.513379	NM_018451	ENSG00000151849	CENPJ	BM032|CENP-J|CPAP|LAP|LIP1|MCPH6|SASS4|SCKL4|Sas-4	centromere protein J	protein-coding
MACS_peak_52919	chr3	121553604	121553747	+	52.74	NA	promoter-TSS (NM_018456)	promoter-TSS (NM_018456)	232	NM_001023570	9657	Hs.604110	NM_001023570	ENSG00000173226	IQCB1	NPHP5|PIQ|SLSN5	IQ motif containing B1	protein-coding
MACS_peak_39949	chr19	42746681	42747601	+	497.23	NA	promoter-TSS (NM_019884)	promoter-TSS (NM_019884)	-387	NM_019884	2931	Hs.466828	NM_019884	ENSG00000105723	GSK3A	-	glycogen synthase kinase 3 alpha	protein-coding
MACS_peak_81211	chr9	139334518	139334815	+	87.79	NA	promoter-TSS (NM_019892)	promoter-TSS (NM_019892)	-369	NM_001318502	56623	Hs.120998	NM_019892	ENSG00000148384	INPP5E	CORS1|CPD4|JBTS1|MORMS|PPI5PIV|pharbin	inositol polyphosphate-5-phosphatase E	protein-coding
MACS_peak_15914	chr11	118436581	118436853	+	89.9	NA	promoter-TSS (NM_020153)	promoter-TSS (NM_020153)	74	NM_020153	56912	Hs.533738	NM_020153	ENSG00000118096	IFT46	C11orf2|C11orf60|CFAP32	intraflagellar transport 46	protein-coding
MACS_peak_61219	chr5	54529112	54530602	+	555.05	NA	promoter-TSS (NM_021147)	promoter-TSS (NM_021147)	-312	NR_125347	10309	Hs.3041	NM_021147	ENSG00000152669	CCNO	CCNU|CILD29|UDG2	cyclin O	protein-coding
MACS_peak_30301	chr17	7835662	7836172	+	123.74	NA	promoter-TSS (NM_021210)	promoter-TSS (NM_021210)	393	NM_001353203	116840	Hs.348012	NM_053051	ENSG00000170037	CNTROB	LIP8|PP1221	centrobin, centriole duplication and spindle assembly protein	protein-coding
MACS_peak_48336	chr21	33984553	33985059	+	256.38	NA	promoter-TSS (NM_021254)	promoter-TSS (NM_021254)	-119	NM_021254	56683	Hs.5811	NM_017835	ENSG00000159079	CFAP298	C21orf48|C21orf59|CILD26|FBB18|Kur	cilia and flagella associated protein 298	protein-coding
MACS_peak_48337	chr21	33985088	33985339	+	111.16	NA	promoter-TSS (NM_021254)	promoter-TSS (NM_021254)	-32	NM_001350335	56683	Hs.5811	NM_017835	ENSG00000159079	CFAP298	C21orf48|C21orf59|CILD26|FBB18|Kur	cilia and flagella associated protein 298	protein-coding
MACS_peak_71760	chr7	132937607	132937852	+	78.76	NA	promoter-TSS (NM_021807)	promoter-TSS (NM_021807)	-94	NM_001037126	60412	Hs.321273	NM_021807	ENSG00000131558	EXOC4	SEC8|SEC8L1|Sec8p	exocyst complex component 4	protein-coding
MACS_peak_20538	chr14	51134952	51135305	+	164.8	NA	promoter-TSS (NM_021818)	promoter-TSS (NM_021818)	-104	NM_021818	60485	Hs.642842	NM_021818	ENSG00000151748	SAV1	SAV|WW45|WWP4	salvador family WW domain containing protein 1	protein-coding
MACS_peak_20539	chr14	51135329	51135445	+	55.54	NA	promoter-TSS (NM_021818)	promoter-TSS (NM_021818)	-363	NM_021818	60485	Hs.642842	NM_021818	ENSG00000151748	SAV1	SAV|WW45|WWP4	salvador family WW domain containing protein 1	protein-coding
MACS_peak_3405	chr1	32665575	32665764	+	50.65	NA	promoter-TSS (NM_024296)	promoter-TSS (NM_024296)	-318	NM_024296	79140	Hs.534482	NM_024296	ENSG00000160050	CCDC28B	-	coiled-coil domain containing 28B	protein-coding
MACS_peak_14455	chr11	66277934	66278223	+	121.7	NA	promoter-TSS (NM_024649)	promoter-TSS (NM_024649)	-28	NM_024649	582	Hs.502915	NM_024649	ENSG00000174483	BBS1	BBS2L2	Bardet-Biedl syndrome 1	protein-coding
MACS_peak_18230	chr12	76741922	76742578	+	404.52	NA	promoter-TSS (NM_024685)	promoter-TSS (NM_024685)	-55	NM_024685	79738	Hs.96322	NM_024685	ENSG00000179941	BBS10	C12orf58	Bardet-Biedl syndrome 10	protein-coding
MACS_peak_43722	chr2	166810449	166810686	+	88.3	NA	promoter-TSS (NM_024753)	promoter-TSS (NM_024753)	-281	NM_024753	79809	Hs.310672	NM_024753	ENSG00000123607	TTC21B	ATD4|IFT139|IFT139B|JBTS11|NPHP12|Nbla10696|SRTD4|THM1	tetratricopeptide repeat domain 21B	protein-coding
MACS_peak_19125	chr12	124155467	124155840	+	97.33	NA	promoter-TSS (NM_024809)	promoter-TSS (NM_024809)	-7	NM_024809	79867	Hs.167165	NM_024809	ENSG00000168778	TCTN2	C12orf38|JBTS24|MKS8|TECT2	tectonic family member 2	protein-coding
MACS_peak_60415	chr5	35617461	35618628	+	451.14	NA	promoter-TSS (NM_024867)	promoter-TSS (NM_024867)	79	NM_144722	79925	Hs.298863	NM_024867	ENSG00000152582	SPEF2	CT122|KPL2	sperm flagellar 2	protein-coding
MACS_peak_36122	chr18	12702212	12703099	+	436.69	NA	promoter-TSS (NM_024899)	promoter-TSS (NM_024899)	67	NM_024899	79959	Hs.236940	NM_024899	ENSG00000101624	CEP76	C18orf9|HsT1705	centrosomal protein 76	protein-coding
MACS_peak_54957	chr4	56814685	56814980	+	109.82	NA	promoter-TSS (NM_025009)	promoter-TSS (NM_025009)	-279	NM_025009	9662	Hs.518767	NM_014645	ENSG00000174799	CEP135	CEP4|KIAA0635|MCPH8	centrosomal protein 135	protein-coding
MACS_peak_54729	chr4	39183755	39184106	+	151.02	NA	promoter-TSS (NM_025132)	promoter-TSS (NM_025132)	-219	NM_025132	57728	Hs.438482	NM_025132	ENSG00000157796	WDR19	ATD5|CED4|DYF-2|IFT144|NPHP13|ORF26|Oseg6|PWDMP|SRTD5	WD repeat domain 19	protein-coding
MACS_peak_39920	chr19	41870195	41870394	+	54.85	NA	promoter-TSS (NM_030578)	promoter-TSS (NM_030578)	-240	NM_030578	80776	Hs.567596	NM_030578	ENSG00000123810	B9D2	ICIS-1|JBTS34|MKS10|MKSR-2|MKSR2	B9 domain containing 2	protein-coding
MACS_peak_32397	chr17	40086444	40086977	+	130.85	NA	promoter-TSS (NM_031421)	promoter-TSS (NM_031421)	-160	NM_001350319	83538	Hs.201134	NM_031421	ENSG00000204815	TTC25	-	tetratricopeptide repeat domain 25	protein-coding
MACS_peak_20931	chr14	74111653	74111819	+	58.49	NA	promoter-TSS (NM_031427)	promoter-TSS (NM_031427)	47	NM_001201366	83544	Hs.271270	NM_031427	ENSG00000119661	DNAL1	C14orf168|CILD16|LC1	dynein axonemal light chain 1	protein-coding
MACS_peak_28476	chr16	56553851	56554190	+	141.46	NA	promoter-TSS (NM_031885)	promoter-TSS (NM_031885)	-84	NM_031885	583	Hs.333738	NM_031885	ENSG00000125124	BBS2	BBS|RP74	Bardet-Biedl syndrome 2	protein-coding
MACS_peak_36135	chr18	12990882	12991382	+	251.46	NA	promoter-TSS (NM_032142)	promoter-TSS (NM_032142)	-229	NM_032142	55125	Hs.100914	NM_018069	ENSG00000101639	CEP192	PPP1R62	centrosomal protein 192	protein-coding
MACS_peak_54249	chr3	197686828	197687038	+	84.13	NA	promoter-TSS (NM_032263)	promoter-TSS (NM_032263)	-43	NM_001323028	84223	Hs.591675	NM_032263	ENSG00000114473	IQCG	CFAP122|DRC9	IQ motif containing G	protein-coding
MACS_peak_26516	chr16	4382114	4382281	+	51.67	NA	promoter-TSS (NM_032575)	promoter-TSS (NM_032575)	-28	NM_032575	84662	Hs.592087	NM_032575	ENSG00000126603	GLIS2	NKL|NPHP7	GLIS family zinc finger 2	protein-coding
MACS_peak_4446	chr1	52869953	52870335	+	162.37	NA	promoter-TSS (NM_032864)	promoter-TSS (NM_032864)	-1	NM_001190819	4998	Hs.17908	NM_004153	ENSG00000085840	ORC1	HSORC1|ORC1L|PARC1	origin recognition complex subunit 1	protein-coding
MACS_peak_4445	chr1	52869603	52869909	+	70.44	NA	promoter-TSS (NM_032864)	promoter-TSS (NM_032864)	339	NM_004153	4998	Hs.17908	NM_004153	ENSG00000085840	ORC1	HSORC1|ORC1L|PARC1	origin recognition complex subunit 1	protein-coding
MACS_peak_23804	chr15	72978336	72978831	+	170.28	NA	promoter-TSS (NM_033028)	promoter-TSS (NM_033028)	35	NM_033028	585	Hs.208681	NM_033028	ENSG00000140463	BBS4	-	Bardet-Biedl syndrome 4	protein-coding
MACS_peak_2473	chr1	23495025	23495501	+	170.71	NA	promoter-TSS (NM_033631)	promoter-TSS (NM_033631)	86	NM_033631	7798	Hs.257900	NM_033631	ENSG00000169641	LUZP1	LUZP	leucine zipper protein 1	protein-coding
MACS_peak_78659	chr9	131418725	131419476	+	398.61	NA	promoter-TSS (NM_052844)	promoter-TSS (NM_052844)	29	NM_052844	89891	Hs.495240	NM_052844	ENSG00000119333	WDR34	DIC5|FAP133|SRTD11|bA216B9.3	WD repeat domain 34	protein-coding
MACS_peak_4556	chr1	54411098	54411423	+	98.54	NA	promoter-TSS (NM_052940)	promoter-TSS (NM_052940)	236	NR_133633	51668	Hs.525462	NM_016126	ENSG00000081870	HSPB11	C1orf41|HSPCO34|IFT25|PP25	heat shock protein family B (small) member 11	protein-coding
MACS_peak_25883	chr16	1833296	1833520	+	74.43	NA	promoter-TSS (NM_080861)	promoter-TSS (NM_080861)	447	NM_001284501	10101	Hs.256549	NM_012225	ENSG00000095906	NUBP2	CFD1|CIAO6|NBP 2|NUBP1	nucleotide binding protein 2	protein-coding
MACS_peak_26613	chr16	4783774	4784069	+	66.65	NA	promoter-TSS (NM_139170)	promoter-TSS (NM_139170)	351	NM_133450	124401	Hs.654859	NM_133450	ENSG00000168096	ANKS3	-	ankyrin repeat and sterile alpha motif domain containing 3	protein-coding
MACS_peak_75872	chr9	34328921	34329294	+	129.37	NA	promoter-TSS (NM_147172)	promoter-TSS (NM_147172)	159	NM_194313	347240	Hs.710246	NM_194313	ENSG00000186638	KIF24	C9orf48|bA571F15.4	kinesin family member 24	protein-coding
MACS_peak_39333	chr19	33462803	33463140	+	83.21	NA	promoter-TSS (NM_152266)	promoter-TSS (NM_152266)	-107	NM_032816	84902	Hs.599703	NM_032816	ENSG00000121289	CEP89	CCDC123|CEP123	centrosomal protein 89	protein-coding
MACS_peak_43890	chr2	178483601	178483867	+	100.28	NA	promoter-TSS (NM_152275)	promoter-TSS (NM_152275)	-264	NM_152275	92104	Hs.128384	NM_152275	ENSG00000197557	TTC30A	IFT70A|TTC30B	tetratricopeptide repeat domain 30A	protein-coding
MACS_peak_43889	chr2	178483368	178483533	+	57.53	NA	promoter-TSS (NM_152275)	promoter-TSS (NM_152275)	20	NM_152275	92104	Hs.128384	NM_152275	ENSG00000197557	TTC30A	IFT70A|TTC30B	tetratricopeptide repeat domain 30A	protein-coding
MACS_peak_43744	chr2	170335960	170336199	+	94.46	NA	promoter-TSS (NM_152384)	promoter-TSS (NM_152384)	75	NM_152384	129880	Hs.233398	NM_152384	ENSG00000163093	BBS5	-	Bardet-Biedl syndrome 5	protein-coding
MACS_peak_44253	chr2	202507386	202507933	+	204.18	NA	promoter-TSS (NM_152388)	promoter-TSS (NM_152388)	-266	NM_152388	65062	Hs.12319	NM_152388	ENSG00000155755	TMEM237	ALS2CR4|JBTS14	transmembrane protein 237	protein-coding
MACS_peak_43887	chr2	178417707	178417937	+	87.4	NA	promoter-TSS (NM_152517)	promoter-TSS (NM_152517)	-298	NM_152517	150737	Hs.447659	NM_152517	ENSG00000196659	TTC30B	IFT70|IFT70B|fleer	tetratricopeptide repeat domain 30B	protein-coding
MACS_peak_78592	chr9	131217733	131219107	+	489.66	NA	promoter-TSS (NM_153440)	promoter-TSS (NM_153440)	-11	NM_001351582	4957	Hs.129055	NM_002540	ENSG00000136811	ODF2	CT134|ODF2/1|ODF2/2|ODF84	outer dense fiber of sperm tails 2	protein-coding
MACS_peak_22518	chr15	43212951	43213467	+	176.63	NA	promoter-TSS (NM_173500)	promoter-TSS (NM_173500)	-233	NM_173500	146057	Hs.646511	NM_173500	ENSG00000128881	TTBK2	SCA11|TTBK	tau tubulin kinase 2	protein-coding
MACS_peak_36610	chr18	67872611	67873304	+	378.87	NA	promoter-TSS (NM_173630)	promoter-TSS (NM_173630)	-34	NM_001318520	25914	Hs.654809	NM_173630	ENSG00000176225	RTTN	MSSP	rotatin	protein-coding
MACS_peak_73355	chr8	96281165	96281559	+	209.75	NA	promoter-TSS (NM_177965)	promoter-TSS (NM_177965)	67	NM_001363260	157657	Hs.548157	NM_177965	ENSG00000156172	C8orf37	BBS21|CORD16|RP64|smalltalk	chromosome 8 open reading frame 37	protein-coding
MACS_peak_73356	chr8	96281641	96281973	+	123.63	NA	promoter-TSS (NM_177965)	promoter-TSS (NM_177965)	-378	NM_177965	157657	Hs.548157	NM_177965	ENSG00000156172	C8orf37	BBS21|CORD16|RP64|smalltalk	chromosome 8 open reading frame 37	protein-coding
MACS_peak_52737	chr3	97483090	97483439	+	130.8	NA	promoter-TSS (NM_177976)	promoter-TSS (NM_177976)	-101	NM_177976	84100	Hs.373801	NM_032146	ENSG00000113966	ARL6	BBS3|RP55	ADP ribosylation factor like GTPase 6	protein-coding
MACS_peak_76686	chr9	96792666	96792906	+	80.59	NA	promoter-TSS (NM_177995)	promoter-TSS (NM_177995)	-309	NM_177995	138639	Hs.437943	NM_152422	ENSG00000158079	PTPDC1	PTP9Q22	protein tyrosine phosphatase domain containing 1	protein-coding
MACS_peak_31287	chr17	27055196	27055633	+	170.78	NA	promoter-TSS (NM_178170)	promoter-TSS (NM_178170)	-392	NM_178170	284086	Hs.448468	NM_178170	ENSG00000160602	NEK8	JCK|NEK12A|NPHP9|RHPD2	NIMA related kinase 8	protein-coding
MACS_peak_31288	chr17	27055640	27055884	+	90.5	NA	promoter-TSS (NM_178170)	promoter-TSS (NM_178170)	-44	NM_178170	284086	Hs.448468	NM_178170	ENSG00000160602	NEK8	JCK|NEK12A|NPHP9|RHPD2	NIMA related kinase 8	protein-coding
MACS_peak_31286	chr17	27054891	27055173	+	89.49	NA	promoter-TSS (NM_178170)	promoter-TSS (NM_178170)	-774	NM_178170	284086	Hs.448468	NM_178170	ENSG00000160602	NEK8	JCK|NEK12A|NPHP9|RHPD2	NIMA related kinase 8	protein-coding
MACS_peak_66427	chr6	80246873	80247358	+	185.08	NA	promoter-TSS (NM_181714)	promoter-TSS (NM_181714)	32	NM_001122769	167691	Hs.21945	NM_181714	ENSG00000135338	LCA5	C6orf152	lebercilin LCA5	protein-coding
MACS_peak_30354	chr17	8080254	8080496	+	66.41	NA	promoter-TSS (NM_183065)	promoter-TSS (NM_183065)	-677	NM_001351278	84314	Hs.513933	NM_032354	ENSG00000179029	TMEM107	GRVS638|JBTS29|MKS13|PRO1268	transmembrane protein 107	protein-coding
MACS_peak_44654	chr2	219221432	219221614	+	56.28	NA	promoter-TSS (NM_198559)	promoter-TSS (NM_198559)	-57	NM_198559	375307	Hs.645453	NM_198559	ENSG00000158428	CATIP	C2orf62	ciliogenesis associated TTC17 interacting protein	protein-coding
MACS_peak_5744	chr1	118727921	118728098	+	53.02	NA	promoter-TSS (NM_206996)	promoter-TSS (NM_206996)	-158	NM_206996	200162	Hs.528821	NM_206996	ENSG00000155761	SPAG17	CT143|PF6	sperm associated antigen 17	protein-coding
MACS_peak_38559	chr19	14225443	14225623	+	62.57	NA	promoter-TSS (NM_207518)	promoter-TSS (NM_207518)	-530	NM_207518	5566	Hs.631630	NM_002730	ENSG00000072062	PRKACA	PKACA|PPNAD4	protein kinase cAMP-activated catalytic subunit alpha	protein-coding
MACS_peak_5019	chr1	84543154	84543347	+	67.23	NA	promoter-TSS (NM_207578)	promoter-TSS (NM_207578)	-408	NM_002731	5567	Hs.487325	NM_002731	ENSG00000142875	PRKACB	PKA C-beta|PKACB	protein kinase cAMP-activated catalytic subunit beta	protein-coding
MACS_peak_5020	chr1	84543396	84543593	+	65.3	NA	promoter-TSS (NM_207578)	promoter-TSS (NM_207578)	-164	NM_002731	5567	Hs.487325	NM_002731	ENSG00000142875	PRKACB	PKA C-beta|PKACB	protein kinase cAMP-activated catalytic subunit beta	protein-coding
MACS_peak_55456	chr4	123653757	123654166	+	153.12	NA	promoter-TSS (NR_024041)	promoter-TSS (NR_024041)	102	NM_152618	166379	Hs.400698	NM_152618	ENSG00000181004	BBS12	C4orf24	Bardet-Biedl syndrome 12	protein-coding
MACS_peak_49284	chr22	37172395	37172693	+	81.97	NA	promoter-TSS (NR_033531)	promoter-TSS (NR_033531)	-381	NM_001363003	11020	Hs.415172	NM_006860	ENSG00000100360	IFT27	BBS19|RABL4|RAYL	intraflagellar transport 27	protein-coding
MACS_peak_30430	chr17	9480059	9480220	+	60.17	NA	promoter-TSS (NR_033656)	promoter-TSS (NR_033656)	180	NM_145054	146845	Hs.232270	NM_145054	ENSG00000166596	CFAP52	WDR16|WDRPUH	cilia and flagella associated protein 52	protein-coding
MACS_peak_44504	chr2	214148851	214149299	+	135.23	NA	promoter-TSS (NR_047659)	promoter-TSS (NR_047659)	-28	NM_001025436	79582	Hs.743365	NM_024532	ENSG00000144451	SPAG16	PF20|WDR29	sperm associated antigen 16	protein-coding
MACS_peak_37786	chr19	8454974	8455300	+	153.85	NA	promoter-TSS (NR_049795)	promoter-TSS (NR_049795)	-107	NM_004218	9230	Hs.558403	NM_004218	ENSG00000185236	RAB11B	H-YPT3|NDAGSCW	RAB11B, member RAS oncogene family	protein-coding
MACS_peak_53043	chr3	127309525	127309978	+	175.99	NA	promoter-TSS (NR_073377)	promoter-TSS (NR_073377)	-175	NR_148226	131601	Hs.6418	NM_016372	ENSG00000163870	TPRA1	GPR175|TMEM227|TPRA40	transmembrane protein adipocyte associated 1	protein-coding
MACS_peak_53044	chr3	127310126	127310354	+	77.92	NA	promoter-TSS (NR_073377)	promoter-TSS (NR_073377)	-664	NR_148226	131601	Hs.6418	NM_016372	ENSG00000163870	TPRA1	GPR175|TMEM227|TPRA40	transmembrane protein adipocyte associated 1	protein-coding
MACS_peak_77115	chr9	123342118	123342776	+	274.23	NA	promoter-TSS (NR_073555)	promoter-TSS (NR_073555)	1	NM_001272039	55755	Hs.269560	NM_018249	ENSG00000136861	CDK5RAP2	C48|Cep215|MCPH3	CDK5 regulatory subunit associated protein 2	protein-coding
MACS_peak_28999	chr16	75590595	75590741	+	65.61	NA	promoter-TSS (NR_074083)	promoter-TSS (NR_074083)	-484	NM_001077416	79583	Hs.156784	NM_001077416	ENSG00000205084	TMEM231	ALYE870|JBTS20|MKS11|PRO1886	transmembrane protein 231	protein-coding
MACS_peak_51662	chr3	45883424	45884033	+	355.93	NA	promoter-TSS (NR_075080)	promoter-TSS (NR_075080)	-117	NR_075080	54585	Hs.30824	NM_020347	ENSG00000163818	LZTFL1	BBS17	leucine zipper transcription factor like 1	protein-coding
MACS_peak_62066	chr5	89705247	89705655	+	130.13	NA	promoter-TSS (NR_105024)	promoter-TSS (NR_105024)	152	NM_001297765	1070	Hs.591767	NM_004365	ENSG00000153140	CETN3	CDC31|CEN3	centrin 3	protein-coding
MACS_peak_51900	chr3	48884509	48884774	+	103.28	NA	promoter-TSS (NR_109996)	promoter-TSS (NR_109996)	666	NM_004157	5576	Hs.631923	NM_004157	ENSG00000114302	PRKAR2A	PKR2|PRKAR2	protein kinase cAMP-dependent type II regulatory subunit alpha	protein-coding
MACS_peak_17131	chr12	49181807	49182096	+	97.06	NA	promoter-TSS (NR_110019)	promoter-TSS (NR_110019)	921	NM_015270	112	Hs.525401	NM_015270	ENSG00000174233	ADCY6	AC6|LCCS8	adenylate cyclase 6	protein-coding
MACS_peak_54152	chr3	196044144	196044521	+	166.78	NA	promoter-TSS (NR_121665)	promoter-TSS (NR_121665)	779	NM_152773	255758	Hs.733180	NM_152773	ENSG00000213123	TCTEX1D2	SRTD17	Tctex1 domain containing 2	protein-coding
MACS_peak_47263	chr20	57464535	57464705	+	57.2	NA	promoter-TSS (NR_126334)	promoter-TSS (NR_126334)	385	NM_001309840	2778	Hs.125898	NM_000516	ENSG00000087460	GNAS	AHO|C20orf45|GNAS1|GPSA|GSA|GSP|NESP|PITA3|POH|SCG6|SgVI	GNAS complex locus	protein-coding
MACS_peak_52516	chr3	57582170	57583796	+	697.71	NA	promoter-TSS (NR_132369)	promoter-TSS (NR_132369)	88	NM_001660	378	Hs.652183	NM_001660	ENSG00000168374	ARF4	ARF2	ADP ribosylation factor 4	protein-coding
MACS_peak_52966	chr3	123710883	123711057	+	59.47	NA	promoter-TSS (NR_133919)	promoter-TSS (NR_133919)	47	NR_133916	54763	Hs.567516	NM_017578	ENSG00000065371	ROPN1	CT91|ODF6|RHPNAP1|ROPN1A|ropporin	rhophilin associated tail protein 1	protein-coding
MACS_peak_55666	chr4	147866886	147867064	+	61.2	NA	promoter-TSS (NR_133922)	promoter-TSS (NR_133922)	41	NM_001317806	83894	Hs.378893	NM_031956	ENSG00000137473	TTC29	NYD-SP14|TBPP2A	tetratricopeptide repeat domain 29	protein-coding
MACS_peak_5344	chr1	100597867	100598659	+	304.47	NA	promoter-TSS (NR_135078)	promoter-TSS (NR_135078)	223	NM_001304829	163786	Hs.591447	NM_194292	ENSG00000156876	SASS6	MCPH14|SAS-6|SAS6	SAS-6 centriolar assembly protein	protein-coding
MACS_peak_52727	chr3	93698824	93699364	+	270.25	NA	promoter-TSS (NR_135621)	promoter-TSS (NR_135621)	95	NR_135621	200894	Hs.533086	NM_144996	ENSG00000169379	ARL13B	ARL2L1|JBTS8	ADP ribosylation factor like GTPase 13B	protein-coding
MACS_peak_51535	chr3	42003210	42004009	+	403.45	NA	promoter-TSS (NR_136342)	promoter-TSS (NR_136342)	-14	NR_136342	54986	Hs.656192	NM_017886	ENSG00000168038	ULK4	FAM7C1|REC01035	unc-51 like kinase 4	protein-coding
MACS_peak_51536	chr3	42004126	42004328	+	52.89	NA	promoter-TSS (NR_136342)	promoter-TSS (NR_136342)	-632	NR_136342	54986	Hs.656192	NM_017886	ENSG00000168038	ULK4	FAM7C1|REC01035	unc-51 like kinase 4	protein-coding
MACS_peak_28568	chr16	58163314	58163642	+	160.43	NA	promoter-TSS (NR_136632)	promoter-TSS (NR_136632)	-149	NR_136632	29105	Hs.532755	NM_013242	ENSG00000070761	CFAP20	BUG22|C16orf80|EVORF|GTL3|fSAP23	cilia and flagella associated protein 20	protein-coding
MACS_peak_11430	chr10	112678334	112678563	+	143.74	NA	promoter-TSS (NR_136749)	promoter-TSS (NR_136749)	246	NM_001195306	92482	Hs.232543	NM_001195304	ENSG00000214413	BBIP1	BBIP10|BBS18|NCRNA00081|bA348N5.3	BBSome interacting protein 1	protein-coding
MACS_peak_68754	chr7	33168569	33169255	+	308.19	NA	promoter-TSS (NR_145411)	promoter-TSS (NR_145411)	15	NM_001348036	27241	Hs.372360	NM_014451	ENSG00000122507	BBS9	B1|C18|D1|PTHB1	Bardet-Biedl syndrome 9	protein-coding
MACS_peak_68753	chr7	33167972	33168288	+	85.36	NA	promoter-TSS (NR_145411)	promoter-TSS (NR_145411)	-767	NR_145411	27241	Hs.372360	NM_014451	ENSG00000122507	BBS9	B1|C18|D1|PTHB1	Bardet-Biedl syndrome 9	protein-coding
MACS_peak_11301	chr10	104473734	104473895	+	60.17	NA	promoter-TSS (NR_146992)	promoter-TSS (NR_146992)	340	NM_004311	403	Hs.182215	NM_004311	ENSG00000138175	ARL3	ARFL3|JBTS35|RP83	ADP ribosylation factor like GTPase 3	protein-coding
MACS_peak_11302	chr10	104474049	104474240	+	50.98	NA	promoter-TSS (NR_146992)	promoter-TSS (NR_146992)	10	NM_004311	403	Hs.182215	NM_004311	ENSG00000138175	ARL3	ARFL3|JBTS35|RP83	ADP ribosylation factor like GTPase 3	protein-coding
MACS_peak_8540	chr1	211848533	211849367	+	345.93	NA	promoter-TSS (NR_148994)	promoter-TSS (NR_148994)	13	NM_002497	4751	Hs.153704	NM_002497	ENSG00000117650	NEK2	HsPK21|NEK2A|NLK1|PPP1R111|RP67	NIMA related kinase 2	protein-coding
MACS_peak_3717	chr1	38412645	38412876	+	111.27	NA	promoter-TSS (NR_158628)	promoter-TSS (NR_158628)	-31	NR_158630	3633	Hs.449942	NM_005540	ENSG00000204084	INPP5B	5PTase	inositol polyphosphate-5-phosphatase B	protein-coding
