# Supplementary material for: Phosphorylation of MIF by PIP4K2a is necessary for cilia biogenesis
Source: Cell Death Dis. 2023 Dec 5;14(12):795. doi: 10.1038/s41419-023-06323-9 (PMC10698143; doi:10.1038/s41419-023-06323-9)
Supplement: Supplementary file 5 — Data Set 2 [file 41419_2023_6323_MOESM5_ESM.xlsx]

## Sheet: GSE65110_MPan1_vsMinput_peaks_a
							Data files S2. The potential MIF target genes other than those related to cilia biogenesis.
PeakID (cmd=annotatePeaks.pl GSE65110_MPan1_vsMinput_peaks.bed.txt hg19 -cpu 8)	Chr	Start	End	Strand	Peak Score	Focus Ratio/Region Size	Annotation	Detailed Annotation	Distance to TSS	Nearest PromoterID	Entrez ID	Nearest Unigene	Nearest Refseq	Nearest Ensembl	Gene Name	Gene Alias	Gene Description	Gene Type
MACS_peak_49902	chr22	43117065	43117337	+	98.27	NA	promoter-TSS (NR_146459)	promoter-TSS (NR_146459)	106	NM_001318038	53947	Hs.105956	NM_017436	ENSG00000128274	A4GALT	A14GALT|A4GALT1|Gb3S|P(k)|P1|P1PK|PK	alpha 1,4-galactosyltransferase (P blood group)	protein-coding
MACS_peak_19243	chr12	125549023	125549243	+	71.04	NA	promoter-TSS (NM_001319839)	promoter-TSS (NM_001319839)	-848	NM_001319839	65985	Hs.656073	NM_023928	ENSG00000081760	AACS	ACSF1|SUR-5	acetoacetyl-CoA synthetase	protein-coding
MACS_peak_55875	chr4	171011265	171011534	+	140.72	NA	promoter-TSS (NM_001286682)	promoter-TSS (NM_001286682)	-27	NM_001286682	51166	Hs.529735	NM_016228	ENSG00000109576	AADAT	KAT2|KATII|KYAT2	aminoadipate aminotransferase	protein-coding
MACS_peak_23421	chr15	67546538	67547555	+	438.72	NA	promoter-TSS (NM_024666)	promoter-TSS (NM_024666)	28	NM_001271886	79719	Hs.254642	NM_024666	ENSG00000103591	AAGAB	KPPP1|PPKP1|PPKP1A|p34	alpha and gamma adaptin binding protein	protein-coding
MACS_peak_15588	chr11	77532416	77532711	+	99.99	NA	promoter-TSS (NM_016578)	promoter-TSS (NM_016578)	403	NM_024684	28971	Hs.745040	NM_024684	ENSG00000087884	AAMDC	C11orf67|CK067|PTD015	adipogenesis associated Mth938 domain containing	protein-coding
MACS_peak_45865	chr20	34824213	34824688	+	148.26	NA	promoter-TSS (NM_001271874)	promoter-TSS (NM_001271874)	50	NM_001271874	25980	Hs.11314	NM_015511	ENSG00000131043	AAR2	C20orf4|CGI-23	AAR2 splicing factor	protein-coding
MACS_peak_28840	chr16	70323054	70323214	+	53.83	NA	promoter-TSS (NM_001257174)	promoter-TSS (NM_001257174)	278	NM_001605	16	Hs.315137	NM_001605	ENSG00000090861	AARS	CMT2N|EIEE29	alanyl-tRNA synthetase	protein-coding
MACS_peak_71459	chr7	121784202	121784434	+	113.4	NA	promoter-TSS (NM_005763)	promoter-TSS (NM_005763)	-15	NM_005763	10157	Hs.156738	NM_005763	ENSG00000008311	AASS	LKR/SDH|LKRSDH|LORSDH	aminoadipate-semialdehyde synthase	protein-coding
MACS_peak_31761	chr17	35305655	35306386	+	393.14	NA	promoter-TSS (NM_012138)	promoter-TSS (NM_012138)	-234	NM_012138	26574	Hs.195740	NM_012138	ENSG00000275700	AATF	BFR2|CHE-1|CHE1|DED	apoptosis antagonizing transcription factor	protein-coding
MACS_peak_35404	chr17	79105686	79105835	+	50.78	NA	promoter-TSS (NM_004920)	promoter-TSS (NM_004920)	-12	NM_004920	9625	Hs.514575	NM_004920	ENSG00000181409	AATK	AATYK|AATYK1|LMR1|LMTK1|PPP1R77|p35BP	apoptosis associated tyrosine kinase	protein-coding
MACS_peak_45471	chr20	30308599	30308902	+	86.52	NA	promoter-TSS (NR_131907)	promoter-TSS (NR_131907)	-560	NR_131907	103021294		NR_131907	ENSG00000281376	ABALON	INXS	apoptotic BCL2L1-antisense long non-coding RNA	ncRNA
MACS_peak_26104	chr16	2390979	2391120	+	53.42	NA	promoter-TSS (NM_001089)	promoter-TSS (NM_001089)	126	NR_003574	650655	Hs.376281	NR_003574	ENSG00000238098	ABCA17P	ABCA17	ATP binding cassette subfamily A member 17, pseudogene	pseudo
MACS_peak_81640	chr9	139923739	139924489	+	284.96	NA	promoter-TSS (NM_212533)	promoter-TSS (NM_212533)	-740	NM_212533	20	Hs.421202	NM_001606	ENSG00000107331	ABCA2	ABC2	ATP binding cassette subfamily A member 2	protein-coding
MACS_peak_81639	chr9	139923294	139923718	+	131.25	NA	promoter-TSS (NM_001606)	promoter-TSS (NM_001606)	-132	NM_212533	20	Hs.421202	NM_001606	ENSG00000107331	ABCA2	ABC2	ATP binding cassette subfamily A member 2	protein-coding
MACS_peak_34279	chr17	67323316	67323987	+	241.7	NA	promoter-TSS (NM_172232)	promoter-TSS (NM_172232)	-377	NM_172232	23461	Hs.731824	NM_018672	ENSG00000154265	ABCA5	ABC13|EST90625|HTC3	ATP binding cassette subfamily A member 5	protein-coding
MACS_peak_36837	chr19	1039734	1040272	+	206.04	NA	promoter-TSS (NM_019112)	promoter-TSS (NM_019112)	-99	NM_019112	10347	Hs.134514	NM_019112	ENSG00000064687	ABCA7	ABCA-SSN|ABCX|AD9	ATP binding cassette subfamily A member 7	protein-coding
MACS_peak_9164	chr1	229694536	229695004	+	236.91	NA	promoter-TSS (NM_012089)	promoter-TSS (NM_012089)	-316	NM_012089	23456	Hs.17614	NM_012089	ENSG00000135776	ABCB10	EST20237|M-ABC2|MTABC2	ATP binding cassette subfamily B member 10	protein-coding
MACS_peak_44745	chr2	220083442	220083851	+	158.1	NA	promoter-TSS (NM_005689)	promoter-TSS (NM_005689)	34	NM_001349828	10058	Hs.107911	NM_005689	ENSG00000115657	ABCB6	ABC|LAN|MTABC3|PRP|umat	ATP binding cassette subfamily B member 6 (Langereis blood group)	protein-coding
MACS_peak_82707	chrX	74375829	74375997	+	71.54	NA	promoter-TSS (NM_001363821)	promoter-TSS (NM_001363821)	205	NM_001271699	22	Hs.370480	NM_004299	ENSG00000131269	ABCB7	ABC7|ASAT|Atm1p|EST140535	ATP binding cassette subfamily B member 7	protein-coding
MACS_peak_71965	chr7	150725341	150725930	+	230.17	NA	promoter-TSS (NM_001282292)	promoter-TSS (NM_001282292)	98	NM_001282292	11194	Hs.647118	NM_007188	ENSG00000197150	ABCB8	EST328128|M-ABC1|MABC1	ATP binding cassette subfamily B member 8	protein-coding
MACS_peak_19068	chr12	123450914	123451117	+	59.9	NA	promoter-TSS (NM_019624)	promoter-TSS (NM_019624)	-5	NM_203444	23457	Hs.511951	NM_019624	ENSG00000150967	ABCB9	EST122234|TAPL	ATP binding cassette subfamily B member 9	protein-coding
MACS_peak_66131	chr6	43395319	43395727	+	127.18	NA	promoter-TSS (NR_146762)	promoter-TSS (NR_146762)	-78	NR_146762	89845	Hs.55879	NM_033450	ENSG00000124574	ABCC10	EST182763|MRP7|SIMRP7	ATP binding cassette subfamily C member 10	protein-coding
MACS_peak_53824	chr3	183735477	183735979	+	265.78	NA	promoter-TSS (NM_005688)	promoter-TSS (NM_005688)	-56	NM_001023587	10057	Hs.368563	NM_005688	ENSG00000114770	ABCC5	ABC33|EST277145|MOAT-C|MOATC|MRP5|SMRP|pABC11	ATP binding cassette subfamily C member 5	protein-coding
MACS_peak_27204	chr16	16317229	16317472	+	62.82	NA	promoter-TSS (NM_001351800)	promoter-TSS (NM_001351800)	-22	NR_147784	368	Hs.442182	NM_001171	ENSG00000091262	ABCC6	ABC34|ARA|EST349056|GACI2|MLP1|MOAT-E|MOATE|MRP6|PXE|PXE1|URG7	ATP binding cassette subfamily C member 6	protein-coding
MACS_peak_83078	chrX	152990422	152990590	+	51.37	NA	promoter-TSS (NM_001139441)	promoter-TSS (NM_001139441)	195	NM_000033	215	Hs.159546	NM_000033	ENSG00000101986	ABCD1	ABC42|ALD|ALDP|AMN	ATP binding cassette subfamily D member 1	protein-coding
MACS_peak_5264	chr1	94883500	94883864	+	122.22	NA	promoter-TSS (NM_002858)	promoter-TSS (NM_002858)	-251	NM_001122674	5825	Hs.700576	NM_002858	ENSG00000117528	ABCD3	ABC43|CBAS5|PMP70|PXMP1|ZWS2	ATP binding cassette subfamily D member 3	protein-coding
MACS_peak_20964	chr14	74769524	74769704	+	54.12	NA	promoter-TSS (NR_148473)	promoter-TSS (NR_148473)	23	NM_001353599	5826	Hs.94395	NM_005050	ENSG00000119688	ABCD4	ABC41|EST352188|MAHCJ|P70R|P79R|PMP69|PXMP1L	ATP binding cassette subfamily D member 4	protein-coding
MACS_peak_55650	chr4	146019336	146019723	+	151.58	NA	promoter-TSS (NM_001256706)	promoter-TSS (NM_001256706)	66	NM_001040876	6059	Hs.12013	NM_002940	ENSG00000164163	ABCE1	ABC38|OABP|RLI|RLI1|RNASEL1|RNASELI|RNS4I	ATP binding cassette subfamily E member 1	protein-coding
MACS_peak_65565	chr6	30539028	30539336	+	172.71	NA	promoter-TSS (NM_001090).4	promoter-TSS (NM_001090).4	-37	NM_001025091	23	Hs.655285	NM_001090	ENSG00000204574	ABCF1	ABC27|ABC50	ATP binding cassette subfamily F member 1	protein-coding
MACS_peak_53838	chr3	183903470	183903771	+	106.81	NA	promoter-TSS (NM_001351299)	promoter-TSS (NM_001351299)	-243	NM_001351299	55324	Hs.361323	NM_018358	ENSG00000161204	ABCF3	EST201864	ATP binding cassette subfamily F member 3	protein-coding
MACS_peak_69682	chr7	73153845	73154089	+	92.67	NA	promoter-TSS (NM_001145364)	promoter-TSS (NM_001145364)	-770	NM_001321383	83451	Hs.647045	NM_148912	ENSG00000106077	ABHD11	PP1226|WBSCR21	abhydrolase domain containing 11	protein-coding
MACS_peak_69679	chr7	73153048	73153219	+	70.42	NA	promoter-TSS (NM_001145364)	promoter-TSS (NM_001145364)	64	NM_148912	83451	Hs.647045	NM_148912	ENSG00000106077	ABHD11	PP1226|WBSCR21	abhydrolase domain containing 11	protein-coding
MACS_peak_69680	chr7	73153274	73153453	+	66.11	NA	promoter-TSS (NM_001145364)	promoter-TSS (NM_001145364)	-166	NM_001321383	83451	Hs.647045	NM_148912	ENSG00000106077	ABHD11	PP1226|WBSCR21	abhydrolase domain containing 11	protein-coding
MACS_peak_69681	chr7	73153506	73153659	+	56.12	NA	promoter-TSS (NM_001145364)	promoter-TSS (NM_001145364)	-385	NM_001321383	83451	Hs.647045	NM_148912	ENSG00000106077	ABHD11	PP1226|WBSCR21	abhydrolase domain containing 11	protein-coding
MACS_peak_69677	chr7	73148490	73148811	+	87.66	NA	promoter-TSS (NR_026690)	promoter-TSS (NR_026690)	-749	NR_026690	171022	Hs.650513	NR_026690		ABHD11-AS1	LINC00035|NCRNA00035|WBSCR26	ABHD11 antisense RNA 1 (tail to tail)	ncRNA
MACS_peak_52263	chr3	52008969	52009117	+	56.52	NA	promoter-TSS (NM_032750)	promoter-TSS (NM_032750)	-37	NM_015407	25864	Hs.534400	NM_015407	ENSG00000248487	ABHD14A	DORZ1	abhydrolase domain containing 14A	protein-coding
MACS_peak_52262	chr3	52008633	52008934	+	102.65	NA	promoter-TSS (NM_032750)	promoter-TSS (NM_032750)	-137	NM_001146314	84836	Hs.420796	NM_032750	ENSG00000114779	ABHD14B	CIB|HEL-S-299	abhydrolase domain containing 14B	protein-coding
MACS_peak_52261	chr3	52007900	52008450	+	209.48	NA	promoter-TSS (NM_015407)	promoter-TSS (NM_015407)	471	NM_032750	84836	Hs.420796	NM_032750	ENSG00000114779	ABHD14B	CIB|HEL-S-299	abhydrolase domain containing 14B	protein-coding
MACS_peak_65663	chr6	31670711	31671184	+	207.21	NA	promoter-TSS (NM_001177515).2	promoter-TSS (NM_001177515).2	154	NR_033489	7920	Hs.388188	NM_021160	ENSG00000204427	ABHD16A	BAT5|D6S82E|NG26|PP199|hBAT5	abhydrolase domain containing 16A	protein-coding
MACS_peak_24874	chr15	89631079	89631623	+	234.85	NA	promoter-TSS (NM_152924)	promoter-TSS (NM_152924)	-336	NM_007011	11057	Hs.122337	NM_007011	ENSG00000140526	ABHD2	HS1-2|LABH2|PHPS1-2	abhydrolase domain containing 2	protein-coding
MACS_peak_24875	chr15	89631653	89631867	+	64.4	NA	promoter-TSS (NM_152924)	promoter-TSS (NM_152924)	73	NM_152924	11057	Hs.122337	NM_007011	ENSG00000140526	ABHD2	HS1-2|LABH2|PHPS1-2	abhydrolase domain containing 2	protein-coding
MACS_peak_36167	chr18	19284799	19285127	+	131.51	NA	promoter-TSS (NM_138340)	promoter-TSS (NM_138340)	-228	NM_001308256	171586	Hs.397978	NM_138340	ENSG00000158201	ABHD3	LABH3	abhydrolase domain containing 3	protein-coding
MACS_peak_51589	chr3	43731796	43732229	+	203.35	NA	promoter-TSS (NM_016006)	promoter-TSS (NM_016006)	-350	NM_001365650	51099	Hs.19385	NM_016006	ENSG00000011198	ABHD5	CGI58|IECN2|NCIE2	abhydrolase domain containing 5	protein-coding
MACS_peak_51590	chr3	43732249	43732685	+	142.82	NA	promoter-TSS (NM_016006)	promoter-TSS (NM_016006)	37	NM_016006	51099	Hs.19385	NM_016006	ENSG00000011198	ABHD5	CGI58|IECN2|NCIE2	abhydrolase domain containing 5	protein-coding
MACS_peak_44343	chr2	204192374	204192970	+	314.78	NA	promoter-TSS (NM_001282926)	promoter-TSS (NM_001282926)	-290	NM_001282932	10152	Hs.471156	NM_005759	ENSG00000138443	ABI2	ABI-2|ABI2B|AIP-1|AIP1|AblBP3|SSH3BP2|argBP1|argBPIA|argBPIB	abl interactor 2	protein-coding
MACS_peak_76929	chr9	111696767	111697043	+	86.91	NA	promoter-TSS (NM_003640)	promoter-TSS (NM_003640)	225	NM_017832	54942	Hs.29276	NM_017832	ENSG00000119328	ABITRAM	C9orf6|CG-8|FAM206A|Simiate	actin binding transcription modulator	protein-coding
MACS_peak_79526	chr9	133588726	133589249	+	119.48	NA	promoter-TSS (NM_007313)	promoter-TSS (NM_007313)	-281	NM_007313	25	Hs.431048	NM_005157	ENSG00000097007	ABL1	ABL|CHDSKM|JTK7|bcr/abl|c-ABL|c-ABL1|p150|v-abl	ABL proto-oncogene 1, non-receptor tyrosine kinase	protein-coding
MACS_peak_79536	chr9	133709987	133710531	+	228.87	NA	promoter-TSS (NM_005157)	promoter-TSS (NM_005157)	-382	NM_005157	25	Hs.431048	NM_005157	ENSG00000097007	ABL1	ABL|CHDSKM|JTK7|bcr/abl|c-ABL|c-ABL1|p150|v-abl	ABL proto-oncogene 1, non-receptor tyrosine kinase	protein-coding
MACS_peak_63501	chr5	148520755	148521382	+	187.87	NA	promoter-TSS (NM_001301018)	promoter-TSS (NM_001301018)	58	NM_001345860	22885	Hs.49688	NM_014945	ENSG00000173210	ABLIM3	HMFN1661	actin binding LIM protein family member 3	protein-coding
MACS_peak_29579	chr17	1090519	1090827	+	102.76	NA	promoter-TSS (NM_001159746)	promoter-TSS (NM_001159746)	-107	NM_001159746	29	Hs.159306	NM_001092	ENSG00000159842	ABR	MDB	ABR activator of RhoGEF and GTPase	protein-coding
MACS_peak_55163	chr4	84406067	84406290	+	66.55	NA	promoter-TSS (NM_001345962)	promoter-TSS (NM_001345962)	75	NM_139076	84142	Hs.334772	NM_139076	ENSG00000163322	ABRAXAS1	ABRA1|CCDC98|FAM175A	abraxas 1, BRCA1 A complex subunit	protein-coding
MACS_peak_65408	chr6	26596930	26597431	+	276.77	NA	promoter-TSS (NM_013375)	promoter-TSS (NM_013375)	-1	NM_013375	29777	Hs.254406	NM_013375	ENSG00000146109	ABT1	Esf2|hABT1	activator of basal transcription 1	protein-coding
MACS_peak_12601	chr11	34379920	34380460	+	182.79	NA	promoter-TSS (NM_145804)	promoter-TSS (NM_145804)	-633	NM_145804	25841	Hs.23361	NM_145804	ENSG00000166016	ABTB2	ABTB2A|BTBD22	ankyrin repeat and BTB domain containing 2	protein-coding
MACS_peak_12600	chr11	34379345	34379684	+	112.06	NA	promoter-TSS (NM_145804)	promoter-TSS (NM_145804)	43	NM_145804	25841	Hs.23361	NM_145804	ENSG00000166016	ABTB2	ABTB2A|BTBD22	ankyrin repeat and BTB domain containing 2	protein-coding
MACS_peak_51455	chr3	38178617	38179248	+	242.72	NA	promoter-TSS (NM_001607)	promoter-TSS (NM_001607)	-199	NR_024024	30	Hs.643487	NM_001607	ENSG00000060971	ACAA1	ACAA|PTHIO|THIO	acetyl-CoA acyltransferase 1	protein-coding
MACS_peak_36455	chr18	47339495	47339805	+	97.28	NA	promoter-TSS (NR_003003)	promoter-TSS (NR_003003)	253	NM_006111	10449	Hs.200136	NM_006111	ENSG00000167315	ACAA2	DSAEC	acetyl-CoA acyltransferase 2	protein-coding
MACS_peak_36456	chr18	47340014	47340264	+	83.92	NA	promoter-TSS (NM_006111)	promoter-TSS (NM_006111)	-236	NM_006111	10449	Hs.200136	NM_006111	ENSG00000167315	ACAA2	DSAEC	acetyl-CoA acyltransferase 2	protein-coding
MACS_peak_31770	chr17	35716517	35716802	+	119.99	NA	promoter-TSS (NM_198836)	promoter-TSS (NM_198836)	-600	NM_198836	31	Hs.160556	NM_000664	ENSG00000278540	ACACA	ACAC|ACACAD|ACC|ACC1|ACCA	acetyl-CoA carboxylase alpha	protein-coding
MACS_peak_53213	chr3	132378756	132379225	+	118.6	NA	promoter-TSS (NM_001321238)	promoter-TSS (NM_001321238)	-15	NR_132426	84129	Hs.441378	NM_032169	ENSG00000240303	ACAD11	ACAD-11	acyl-CoA dehydrogenase family member 11	protein-coding
MACS_peak_53104	chr3	128598016	128598775	+	378.82	NA	promoter-TSS (NR_033426)	promoter-TSS (NR_033426)	62	NR_033426	28976	Hs.567482	NM_014049	ENSG00000177646	ACAD9	MC1DN20|NPD002	acyl-CoA dehydrogenase family member 9	protein-coding
MACS_peak_18905	chr12	121163454	121163755	+	87.31	NA	promoter-TSS (NM_000017)	promoter-TSS (NM_000017)	-25	NM_001302554	35	Hs.507076	NM_000017	ENSG00000122971	ACADS	ACAD3|SCAD	acyl-CoA dehydrogenase short chain	protein-coding
MACS_peak_30143	chr17	7119609	7119757	+	53.18	NA	promoter-TSS (NM_001270447)	promoter-TSS (NM_001270447)	-761	NM_001270447	37	Hs.437178	NM_000018	ENSG00000072778	ACADVL	ACAD6|LCACD|VLCAD	acyl-CoA dehydrogenase very long chain	protein-coding
MACS_peak_54074	chr3	195163765	195164123	+	129.27	NA	promoter-TSS (NM_012287)	promoter-TSS (NM_012287)	-195	NM_012287	23527	Hs.593373	NM_012287	ENSG00000114331	ACAP2	CENTB2|CNT-B2	ArfGAP with coiled-coil, ankyrin repeat and PH domains 2	protein-coding
MACS_peak_183	chr1	1243394	1243725	+	137.42	NA	promoter-TSS (NM_001346116)	promoter-TSS (NM_001346116)	-249	NM_030649	116983	Hs.535257	NM_030649	ENSG00000131584	ACAP3	CENTB5	ArfGAP with coiled-coil, ankyrin repeat and PH domains 3	protein-coding
MACS_peak_15871	chr11	107992242	107992404	+	53.2	NA	promoter-TSS (NM_000019)	promoter-TSS (NM_000019)	29	NM_000019	38	Hs.232375	NM_000019	ENSG00000075239	ACAT1	ACAT|MAT|T2|THIL	acetyl-CoA acetyltransferase 1	protein-coding
MACS_peak_8945	chr1	226374346	226374956	+	221.34	NA	promoter-TSS (NM_022735)	promoter-TSS (NM_022735)	-209	NM_022735	64746	Hs.520207	NM_022735	ENSG00000182827	ACBD3	GCP60|GOCAP1|GOLPH1|PAP7	acyl-CoA binding domain containing 3	protein-coding
MACS_peak_32900	chr17	43210097	43210528	+	144.95	NA	promoter-TSS (NM_133373)	promoter-TSS (NM_133373)	326	NM_001321352	79777	Hs.110298	NM_024722	ENSG00000181513	ACBD4	HMFT0700	acyl-CoA binding domain containing 4	protein-coding
MACS_peak_32901	chr17	43210560	43210975	+	137.25	NA	promoter-TSS (NM_133373)	promoter-TSS (NM_133373)	781	NM_001321352	79777	Hs.110298	NM_024722	ENSG00000181513	ACBD4	HMFT0700	acyl-CoA binding domain containing 4	protein-coding
MACS_peak_32902	chr17	43212661	43212962	+	127.47	NA	promoter-TSS (NM_024722)	promoter-TSS (NM_024722)	-243	NM_001135707	79777	Hs.110298	NM_024722	ENSG00000181513	ACBD4	HMFT0700	acyl-CoA binding domain containing 4	protein-coding
MACS_peak_12690	chr11	44087384	44087645	+	93.56	NA	promoter-TSS (NM_001127219)	promoter-TSS (NM_001127219)	-306	NM_032592	84680	Hs.126706	NM_032592	ENSG00000110455	ACCS	ACS|PHACS	1-aminocyclopropane-1-carboxylate synthase homolog (inactive)	protein-coding
MACS_peak_75620	chr9	19408881	19409035	+	56.85	NA	promoter-TSS (NM_001010887)	promoter-TSS (NM_001010887)	-49	NM_001010887	340485	Hs.41379	NM_001010887	ENSG00000177076	ACER2	ALKCDase2|ASAH3L	alkaline ceramidase 2	protein-coding
MACS_peak_75619	chr9	19408498	19408658	+	55.48	NA	promoter-TSS (NM_001010887)	promoter-TSS (NM_001010887)	-429	NM_001010887	340485	Hs.41379	NM_001010887	ENSG00000177076	ACER2	ALKCDase2|ASAH3L	alkaline ceramidase 2	protein-coding
MACS_peak_15537	chr11	76571346	76571701	+	87.81	NA	promoter-TSS (NM_018367)	promoter-TSS (NM_018367)	-439	NM_018367	55331	Hs.23862	NM_018367	ENSG00000078124	ACER3	APHC|PHCA|PLDECO	alkaline ceramidase 3	protein-coding
MACS_peak_70814	chr7	100492719	100493002	+	92.89	NA	promoter-TSS (NM_001367917)	promoter-TSS (NM_001367917)	-633	NM_001367917	43	Hs.154495	NM_000665	ENSG00000087085	ACHE	ACEE|ARACHE|N-ACHE|YT	acetylcholinesterase (Cartwright blood group)	protein-coding
MACS_peak_20241	chr14	23564686	23565163	+	167.46	NA	promoter-TSS (NM_014977)	promoter-TSS (NM_014977)	-101	NM_001164814	22985	Hs.124490	NM_014977	ENSG00000100813	ACIN1	ACINUS|ACN|fSAP152	apoptotic chromatin condensation inducer 1	protein-coding
MACS_peak_20237	chr14	23540662	23540815	+	61.25	NA	promoter-TSS (NM_001164816)	promoter-TSS (NM_001164816)	40	NM_001164816	22985	Hs.124490	NM_014977	ENSG00000100813	ACIN1	ACINUS|ACN|fSAP152	apoptotic chromatin condensation inducer 1	protein-coding
MACS_peak_45170	chr2	237478246	237478498	+	89.9	NA	promoter-TSS (NM_020311)	promoter-TSS (NM_020311)	-96	NM_020311	57007	Hs.471751	NM_020311	ENSG00000144476	ACKR3	CMKOR1|CXC-R7|CXCR-7|CXCR7|GPR159|RDC-1|RDC1	atypical chemokine receptor 3	protein-coding
MACS_peak_32389	chr17	40074894	40075528	+	336.77	NA	promoter-TSS (NM_001303274)	promoter-TSS (NM_001303274)	-7	NM_001096	47	Hs.387567	NM_001096	ENSG00000131473	ACLY	ACL|ATPCL|CLATP	ATP citrate lyase	protein-coding
MACS_peak_32390	chr17	40075596	40076009	+	109.16	NA	promoter-TSS (NM_001303274)	promoter-TSS (NM_001303274)	-527	NM_001303275	47	Hs.387567	NM_001096	ENSG00000131473	ACLY	ACL|ATPCL|CLATP	ATP citrate lyase	protein-coding
MACS_peak_49674	chr22	41864387	41865440	+	579.97	NA	promoter-TSS (NM_032758)	promoter-TSS (NM_032758)	-208	NM_001098	50	Hs.643610	NM_001098	ENSG00000100412	ACO2	ACONM|HEL-S-284|ICRD|OCA8|OPA9	aconitase 2	protein-coding
MACS_peak_686	chr1	6454052	6454405	+	106.28	NA	promoter-TSS (NM_007274)	promoter-TSS (NM_007274)	-402	NM_007274	11332	Hs.126137	NM_007274	ENSG00000097021	ACOT7	ACH1|ACT|BACH|CTE-II|LACH|LACH1|hBACH	acyl-CoA thioesterase 7	protein-coding
MACS_peak_46276	chr20	44485386	44485921	+	260.86	NA	promoter-TSS (NR_037628)	promoter-TSS (NR_037628)	378	NM_005469	10005	Hs.444776	NM_005469	ENSG00000101473	ACOT8	HNAACTE|NAP1|PTE-1|PTE-2|PTE1|PTE2|hACTE-III|hTE	acyl-CoA thioesterase 8	protein-coding
MACS_peak_82281	chrX	23761079	23761652	+	257.79	NA	promoter-TSS (NM_001037171)	promoter-TSS (NM_001037171)	28	NM_001330259	23597	Hs.298885	NM_001033583	ENSG00000123130	ACOT9	ACATE2|CGI-16|MT-ACT48|MTACT48	acyl-CoA thioesterase 9	protein-coding
MACS_peak_41303	chr2	264780	265219	+	182.1	NA	promoter-TSS (NR_104224)	promoter-TSS (NR_104224)	52	NM_004300	52	Hs.558296	NM_004300	ENSG00000143727	ACP1	HAAP|LMW-PTP|LMWPTP	acid phosphatase 1	protein-coding
MACS_peak_6075	chr1	147142208	147143030	+	299.64	NA	promoter-TSS (NR_136636)	promoter-TSS (NR_136636)	27	NR_136633	51205	Hs.562154	NM_016361	ENSG00000162836	ACP6	ACPL1|LPAP|PACPL1	acid phosphatase 6, lysophosphatidic	protein-coding
MACS_peak_37629	chr19	6135033	6135206	+	62.85	NA	promoter-TSS (NM_030924)	promoter-TSS (NM_030924)	-525	NM_001289180	81616	Hs.465720	NM_030924	ENSG00000130377	ACSBG2	BGR|BRGL|PRTD-NY3|PRTDNY3	acyl-CoA synthetase bubblegum family member 2	protein-coding
MACS_peak_44887	chr2	223725652	223725910	+	80.46	NA	promoter-TSS (NM_004457)	promoter-TSS (NM_004457)	27	NM_001354158	2181	Hs.655772	NM_004457	ENSG00000123983	ACSL3	ACS3|FACL3|LACS 3|LACS3|PRO2194	acyl-CoA synthetase long chain family member 3	protein-coding
MACS_peak_82814	chrX	108976335	108976760	+	125.52	NA	promoter-TSS (NM_001318510)	promoter-TSS (NM_001318510)	-61	NM_004458	2182	Hs.268785	NM_004458	ENSG00000068366	ACSL4	ACS4|FACL4|LACS4|MRX63|MRX68	acyl-CoA synthetase long chain family member 4	protein-coding
MACS_peak_10965	chr10	90692418	90692610	+	62.39	NA	promoter-TSS (NR_125373)	promoter-TSS (NR_125373)	73	NR_125373	100132116		NR_125373	ENSG00000180139	ACTA2-AS1	UC001kfo|ZXF1|uc001kfo.1	ACTA2 antisense RNA 1	ncRNA
MACS_peak_68016	chr7	5570146	5570467	+	124.12	NA	promoter-TSS (NM_001101)	promoter-TSS (NM_001101)	-74	NM_001101	60	Hs.520640	NM_001101	ENSG00000075624	ACTB	BRWS1|PS1TP5BP1	actin beta	protein-coding
MACS_peak_68017	chr7	5570808	5570978	+	57.65	NA	promoter-TSS (NM_001101)	promoter-TSS (NM_001101)	-661	NM_001101	60	Hs.520640	NM_001101	ENSG00000075624	ACTB	BRWS1|PS1TP5BP1	actin beta	protein-coding
MACS_peak_22057	chr15	35088373	35088650	+	60.28	NA	promoter-TSS (NM_005159)	promoter-TSS (NM_005159)	-761	NM_005159	70	Hs.118127	NM_005159	ENSG00000159251	ACTC1	ACTC|ASD5|CMD1R|CMH11|LVNC4	actin alpha cardiac muscle 1	protein-coding
MACS_peak_35546	chr17	79480175	79481360	+	592.63	NA	promoter-TSS (NR_037688)	promoter-TSS (NR_037688)	-942	NR_037688	71	Hs.514581	NM_001614	ENSG00000184009	ACTG1	ACT|ACTG|DFNA20|DFNA26|HEL-176	actin gamma 1	protein-coding
MACS_peak_35545	chr17	79479754	79479907	+	56.12	NA	promoter-TSS (NR_037688)	promoter-TSS (NR_037688)	-5	NR_037688	71	Hs.514581	NM_001614	ENSG00000184009	ACTG1	ACT|ACTG|DFNA20|DFNA26|HEL-176	actin gamma 1	protein-coding
MACS_peak_45631	chr20	32254267	32254713	+	145.74	NA	promoter-TSS (NM_001024675)	promoter-TSS (NM_001024675)	-259	NM_001024675	170487	Hs.592151	NM_001024675	ENSG00000182584	ACTL10	C20orf134|dJ63M2.2	actin like 10	protein-coding
MACS_peak_53766	chr3	179280377	179280846	+	191.02	NA	promoter-TSS (NM_004301)	promoter-TSS (NM_004301)	-57	NM_177989	86	Hs.435326	NM_004301	ENSG00000136518	ACTL6A	ACTL6|ARPN-BETA|Arp4|BAF53A|INO80K	actin like 6A	protein-coding
MACS_peak_20845	chr14	69446104	69446441	+	164.07	NA	promoter-TSS (NM_001130004)	promoter-TSS (NM_001130004)	-127	NR_073422	161159	Hs.603341	NR_073422	ENSG00000259062	ACTN1-AS1	C14orf84	ACTN1 antisense RNA 1	ncRNA
MACS_peak_39655	chr19	39138045	39138279	+	89.35	NA	promoter-TSS (NM_004924)	promoter-TSS (NM_004924)	-127	NM_004924	81	Hs.270291	NM_004924	ENSG00000130402	ACTN4	ACTININ-4|FSGS|FSGS1	actinin alpha 4	protein-coding
MACS_peak_43026	chr2	98280463	98280952	+	211.79	NA	promoter-TSS (NM_005735)	promoter-TSS (NM_005735)	-200	NM_005735	10120	Hs.98791	NM_005735	ENSG00000115073	ACTR1B	ARP1B|CTRN2|PC3	actin related protein 1B	protein-coding
MACS_peak_42354	chr2	65454612	65454821	+	84.5	NA	promoter-TSS (NM_005722)	promoter-TSS (NM_005722)	-113	NM_005722	10097	Hs.643727	NM_005722	ENSG00000138071	ACTR2	ARP2	actin related protein 2	protein-coding
MACS_peak_43266	chr2	114647182	114647776	+	256.6	NA	promoter-TSS (NR_102318)	promoter-TSS (NR_102318)	-32	NR_102318	10096	Hs.433512	NM_005721	ENSG00000115091	ACTR3	ARP3	actin related protein 3	protein-coding
MACS_peak_46057	chr20	37376875	37377033	+	61.2	NA	promoter-TSS (NM_024855)	promoter-TSS (NM_024855)	-149	NM_024855	79913	Hs.371585	NM_024855	ENSG00000101442	ACTR5	Arp5|INO80M	actin related protein 5	protein-coding
MACS_peak_18431	chr12	100594463	100594660	+	91.33	NA	promoter-TSS (NR_048568)	promoter-TSS (NR_048568)	-32	NR_048569	64431	Hs.115088	NM_022496	ENSG00000075089	ACTR6	ARP6|CDA12|HSPC281|MSTP136|hARP6|hARPX	actin related protein 6	protein-coding
MACS_peak_18430	chr12	100593943	100594158	+	62.64	NA	promoter-TSS (NR_048568)	promoter-TSS (NR_048568)	185	NM_022496	64431	Hs.115088	NM_022496	ENSG00000075089	ACTR6	ARP6|CDA12|HSPC281|MSTP136|hARP6|hARPX	actin related protein 6	protein-coding
MACS_peak_18429	chr12	100593536	100593821	+	92.25	NA	promoter-TSS (NM_022496)	promoter-TSS (NM_022496)	-187	NM_022496	64431	Hs.115088	NM_022496	ENSG00000075089	ACTR6	ARP6|CDA12|HSPC281|MSTP136|hARP6|hARPX	actin related protein 6	protein-coding
MACS_peak_18428	chr12	100593047	100593248	+	73.58	NA	promoter-TSS (NM_022496)	promoter-TSS (NM_022496)	-718	NM_022496	64431	Hs.115088	NM_022496	ENSG00000075089	ACTR6	ARP6|CDA12|HSPC281|MSTP136|hARP6|hARPX	actin related protein 6	protein-coding
MACS_peak_53644	chr3	169487333	169487619	+	105.23	NA	promoter-TSS (NM_032487)	promoter-TSS (NM_032487)	-127	NM_032487	84517	Hs.135411	NM_032487	ENSG00000184378	ACTRT3	ARP-T3|ARPM1	actin related protein T3	protein-coding
MACS_peak_17463	chr12	52346039	52346457	+	111.13	NA	promoter-TSS (NM_020327)	promoter-TSS (NM_020327)	765	NM_020328	91	Hs.438918	NM_004302	ENSG00000135503	ACVR1B	ACTRIB|ACVRLK4|ALK4|SKR2	activin A receptor type 1B	protein-coding
MACS_peak_43547	chr2	148602351	148602595	+	94.26	NA	promoter-TSS (NM_001616)	promoter-TSS (NM_001616)	-125	NM_001616	92	Hs.470174	NM_001616	ENSG00000121989	ACVR2A	ACTRII|ACVR2	activin A receptor type 2A	protein-coding
MACS_peak_52267	chr3	52016678	52017218	+	139.64	NA	promoter-TSS (NM_000666)	promoter-TSS (NM_000666)	-603	NM_001198896	95	Hs.334707	NM_000666	ENSG00000243989	ACY1	ACY-1|ACY1D|HEL-S-5	aminoacylase 1	protein-coding
MACS_peak_52268	chr3	52017266	52017616	+	117.16	NA	promoter-TSS (NM_000666)	promoter-TSS (NM_000666)	-110	NM_001198896	95	Hs.334707	NM_000666	ENSG00000243989	ACY1	ACY-1|ACY1D|HEL-S-5	aminoacylase 1	protein-coding
MACS_peak_14791	chr11	67418215	67418497	+	99.09	NA	promoter-TSS (NM_080658)	promoter-TSS (NM_080658)	-155	NM_080658	91703	Hs.126265	NM_080658	ENSG00000132744	ACY3	ACY-3|HCBP1	aminoacylase 3	protein-coding
MACS_peak_20986	chr14	75530677	75530846	+	57.15	NA	promoter-TSS (NR_126393)	promoter-TSS (NR_126393)	-9	NR_126395	97	Hs.18573	NM_001107	ENSG00000119640	ACYP1	ACYPE	acylphosphatase 1	protein-coding
MACS_peak_20988	chr14	75535858	75536475	+	383.91	NA	promoter-TSS (NM_001042430)	promoter-TSS (NM_001042430)	27	NM_001302617	97	Hs.18573	NM_001107	ENSG00000119640	ACYP1	ACYPE	acylphosphatase 1	protein-coding
MACS_peak_42162	chr2	54342546	54342683	+	57.13	NA	promoter-TSS (NM_001320590)	promoter-TSS (NM_001320590)	-138	NM_001320590	98	Hs.516173	NM_138448	ENSG00000170634	ACYP2	ACYM|ACYP	acylphosphatase 2	protein-coding
MACS_peak_22933	chr15	59041715	59042542	+	299.37	NA	promoter-TSS (NM_001110)	promoter-TSS (NM_001110)	-222	NM_001110	102	Hs.172028	NM_001110	ENSG00000137845	ADAM10	AD10|AD18|CD156c|CDw156|HsT18717|MADM|RAK|kuz	ADAM metallopeptidase domain 10	protein-coding
MACS_peak_6742	chr1	155023920	155024419	+	159.28	NA	promoter-TSS (NR_040772)	promoter-TSS (NR_040772)	377	NM_001261466	8751	Hs.312098	NM_003815	ENSG00000143537	ADAM15	MDC15	ADAM metallopeptidase domain 15	protein-coding
MACS_peak_41377	chr2	9695643	9696189	+	225.3	NA	promoter-TSS (NM_003183)	promoter-TSS (NM_003183)	43	NM_003183	6868	Hs.404914	NM_003183	ENSG00000151694	ADAM17	ADAM18|CD156B|CSVP|NISBD|NISBD1|TACE	ADAM metallopeptidase domain 17	protein-coding
MACS_peak_72758	chr8	38854375	38854669	+	89.43	NA	promoter-TSS (NM_031940)	promoter-TSS (NM_031940)	17	NR_027638	8754	Hs.591852	NM_003816	ENSG00000168615	ADAM9	CORD9|MCMP|MDC9|Mltng	ADAM metallopeptidase domain 9	protein-coding
MACS_peak_48286	chr21	28217548	28217900	+	150.7	NA	promoter-TSS (NM_006988)	promoter-TSS (NM_006988)	4	NM_006988	9510	Hs.643357	NM_006988	ENSG00000154734	ADAMTS1	C3-C5|METH1	ADAM metallopeptidase with thrombospondin type 1 motif 1	protein-coding
MACS_peak_60282	chr5	33892506	33893238	+	62.47	NA	promoter-TSS (NM_001324512)	promoter-TSS (NM_001324512)	-777	NM_001324512	81792	Hs.12680	NM_030955	ENSG00000151388	ADAMTS12	PRO4389	ADAM metallopeptidase with thrombospondin type 1 motif 12	protein-coding
MACS_peak_80125	chr9	136286913	136287168	+	57.72	NA	promoter-TSS (NM_139025)	promoter-TSS (NM_139025)	-80	NM_139025	11093	Hs.131433	NM_139025	ENSG00000160323	ADAMTS13	ADAM-TS13|ADAMTS-13|C9orf8|VWFCP|vWF-CP	ADAM metallopeptidase with thrombospondin type 1 motif 13	protein-coding
MACS_peak_55039	chr4	73434932	73435086	+	55.78	NA	promoter-TSS (NM_014243)	promoter-TSS (NM_014243)	-71	NM_014243	9508	Hs.590919	NM_014243	ENSG00000156140	ADAMTS3	ADAMTS-4|HKLLS3	ADAM metallopeptidase with thrombospondin type 1 motif 3	protein-coding
MACS_peak_48288	chr21	28339868	28340032	+	52.58	NA	promoter-TSS (NM_007038)	promoter-TSS (NM_007038)	-543	NM_007038	11096	Hs.58324	NM_007038	ENSG00000154736	ADAMTS5	ADAM-TS 11|ADAM-TS 5|ADAM-TS5|ADAMTS-11|ADAMTS-5|ADAMTS11|ADMP-2	ADAM metallopeptidase with thrombospondin type 1 motif 5	protein-coding
MACS_peak_61381	chr5	64777597	64777859	+	145.7	NA	promoter-TSS (NM_197941)	promoter-TSS (NM_197941)	19	NM_197941	11174	Hs.482291	NM_197941	ENSG00000049192	ADAMTS6	ADAM-TS 6|ADAM-TS6|ADAMTS-6	ADAM metallopeptidase with thrombospondin type 1 motif 6	protein-coding
MACS_peak_80176	chr9	136399211	136399387	+	53.82	NA	promoter-TSS (NM_014694)	promoter-TSS (NM_014694)	-527	NM_014694	9719	Hs.522543	NM_014694	ENSG00000197859	ADAMTSL2	ADAMTSL-2|GPHYSD1	ADAMTS like 2	protein-coding
MACS_peak_80174	chr9	136396983	136397270	+	68.2	NA	promoter-TSS (NM_001145320)	promoter-TSS (NM_001145320)	-160	NM_001145320	9719	Hs.522543	NM_014694	ENSG00000197859	ADAMTSL2	ADAMTSL-2|GPHYSD1	ADAMTS like 2	protein-coding
MACS_peak_6335	chr1	150521164	150521328	+	63.78	NA	promoter-TSS (NM_001288607)	promoter-TSS (NM_001288607)	-599	NM_001288608	54507	Hs.516243	NM_019032	ENSG00000143382	ADAMTSL4	ADAMTSL-4|ECTOL2|TSRC1	ADAMTS like 4	protein-coding
MACS_peak_67475	chr7	995036	995155	+	61.74	NA	promoter-TSS (NM_006869)	promoter-TSS (NM_006869)	-52	NM_001284308	11033	Hs.602573	NM_006869	ENSG00000105963	ADAP1	CENTA1|GCS1L|p42IP4	ArfGAP with dual PH domains 1	protein-coding
MACS_peak_67468	chr7	960524	960687	+	52.89	NA	promoter-TSS (NM_001284311)	promoter-TSS (NM_001284311)	-79	NM_001284311	11033	Hs.602573	NM_006869	ENSG00000105963	ADAP1	CENTA1|GCS1L|p42IP4	ArfGAP with dual PH domains 1	protein-coding
MACS_peak_67476	chr7	995346	995590	+	62.75	NA	promoter-TSS (NM_001284308)	promoter-TSS (NM_001284308)	-425	NM_001284308	11033	Hs.602573	NM_006869	ENSG00000105963	ADAP1	CENTA1|GCS1L|p42IP4	ArfGAP with dual PH domains 1	protein-coding
MACS_peak_67477	chr7	995649	995865	+	51.58	NA	promoter-TSS (NM_001284308)	promoter-TSS (NM_001284308)	-714	NM_001284308	11033	Hs.602573	NM_006869	ENSG00000105963	ADAP1	CENTA1|GCS1L|p42IP4	ArfGAP with dual PH domains 1	protein-coding
MACS_peak_6672	chr1	154580651	154581052	+	148.44	NA	promoter-TSS (NM_001365049)	promoter-TSS (NM_001365049)	-189	NM_015840	103	Hs.12341	NM_001111	ENSG00000160710	ADAR	ADAR1|AGS6|DRADA|DSH|DSRAD|G1P1|IFI-4|IFI4|K88DSRBP|P136	adenosine deaminase RNA specific	protein-coding
MACS_peak_6673	chr1	154581070	154581237	+	59.63	NA	promoter-TSS (NM_001365049)	promoter-TSS (NM_001365049)	120	NM_001365048	103	Hs.12341	NM_001111	ENSG00000160710	ADAR	ADAR1|AGS6|DRADA|DSH|DSRAD|G1P1|IFI-4|IFI4|K88DSRBP|P136	adenosine deaminase RNA specific	protein-coding
MACS_peak_6675	chr1	154600178	154600593	+	142.43	NA	promoter-TSS (NM_001365046)	promoter-TSS (NM_001365046)	62	NM_001025107	103	Hs.12341	NM_001111	ENSG00000160710	ADAR	ADAR1|AGS6|DRADA|DSH|DSRAD|G1P1|IFI-4|IFI4|K88DSRBP|P136	adenosine deaminase RNA specific	protein-coding
MACS_peak_29002	chr16	75656991	75657371	+	237.34	NA	promoter-TSS (NM_001324444)	promoter-TSS (NM_001324444)	-2	NM_001324450	23536	Hs.729312	NM_012091	ENSG00000065457	ADAT1	HADAT1	adenosine deaminase tRNA specific 1	protein-coding
MACS_peak_66986	chr6	143771525	143771785	+	87.24	NA	promoter-TSS (NM_003630)	promoter-TSS (NM_003630)	177	NM_182503	134637	Hs.709561	NM_182503	ENSG00000189007	ADAT2	DEADC1|TAD2|dJ20N2|dJ20N2.1	adenosine deaminase tRNA specific 2	protein-coding
MACS_peak_17131	chr12	49181807	49182096	+	97.06	NA	promoter-TSS (NR_110019)	promoter-TSS (NR_110019)	921	NM_015270	112	Hs.525401	NM_015270	ENSG00000174233	ADCY6	AC6|LCCS8	adenylate cyclase 6	protein-coding
MACS_peak_26456	chr16	4166666	4166963	+	97.84	NA	promoter-TSS (NM_001116)	promoter-TSS (NM_001116)	-371	NM_001116	115	Hs.391860	NM_001116	ENSG00000162104	ADCY9	AC9|ACIX	adenylate cyclase 9	protein-coding
MACS_peak_11388	chr10	111766912	111767213	+	100.16	NA	promoter-TSS (NM_016824)	promoter-TSS (NM_016824)	-680	NM_016824	120	Hs.501012	NM_001121	ENSG00000148700	ADD3	ADDL|CPSQ3	adducin 3	protein-coding
MACS_peak_3340	chr1	32230140	32230453	+	116.33	NA	promoter-TSS (NM_001364857)	promoter-TSS (NM_001364857)	-355	NM_001294335	576	Hs.524138	NM_001294335	ENSG00000121753	ADGRB2	BAI2	adhesion G protein-coupled receptor B2	protein-coding
MACS_peak_3341	chr1	32230657	32231002	+	69.33	NA	promoter-TSS (NM_001294336)	promoter-TSS (NM_001294336)	-888	NM_001294335	576	Hs.524138	NM_001294335	ENSG00000121753	ADGRB2	BAI2	adhesion G protein-coupled receptor B2	protein-coding
MACS_peak_38738	chr19	14887813	14888144	+	122.31	NA	promoter-TSS (NM_001271052)	promoter-TSS (NM_001271052)	-239	NM_001271052	30817	Hs.531619	NM_013447	ENSG00000127507	ADGRE2	CD312|CD97|EMR2|VBU	adhesion G protein-coupled receptor E2	protein-coding
MACS_peak_38642	chr19	14491745	14492259	+	283.91	NA	promoter-TSS (NM_078481)	promoter-TSS (NM_078481)	46	NM_001025160	976	Hs.466039	NM_001784	ENSG00000123146	ADGRE5	CD97|TM7LN1	adhesion G protein-coupled receptor E5	protein-coding
MACS_peak_41655	chr2	26568291	26568545	+	65.57	NA	promoter-TSS (NR_137633)	promoter-TSS (NR_137633)	261	NM_001321975	165082	Hs.631878	NM_153835	ENSG00000173567	ADGRF3	GPR113|PGR23	adhesion G protein-coupled receptor F3	protein-coding
MACS_peak_41656	chr2	26568576	26568726	+	50.46	NA	promoter-TSS (NR_137633)	promoter-TSS (NR_137633)	28	NM_001321975	165082	Hs.631878	NM_153835	ENSG00000173567	ADGRF3	GPR113|PGR23	adhesion G protein-coupled receptor F3	protein-coding
MACS_peak_28537	chr16	57662495	57662671	+	55.32	NA	promoter-TSS (NM_201525)	promoter-TSS (NM_201525)	41	NM_001145772	9289	Hs.513633	NM_005682	ENSG00000205336	ADGRG1	BFPP|BPPR|GPR56|TM7LN4|TM7XN1	adhesion G protein-coupled receptor G1	protein-coding
MACS_peak_66977	chr6	142623011	142623315	+	105.8	NA	promoter-TSS (NM_198569)	promoter-TSS (NM_198569)	19	NM_198569	57211	Hs.743302	NM_020455	ENSG00000112414	ADGRG6	APG1|DREG|GPR126|LCCS9|PR126|PS1TP2|VIGR	adhesion G protein-coupled receptor G6	protein-coding
MACS_peak_5003	chr1	82267973	82268280	+	118.33	NA	promoter-TSS (NM_001366007)	promoter-TSS (NM_001366007)	-12	NM_001366007	23266	Hs.24212	NM_012302	ENSG00000117114	ADGRL2	CIRL2|CL2|LEC1|LPHH1|LPHN2	adhesion G protein-coupled receptor L2	protein-coding
MACS_peak_5002	chr1	82267387	82267640	+	89.56	NA	promoter-TSS (NM_001366007)	promoter-TSS (NM_001366007)	-625	NM_001366007	23266	Hs.24212	NM_012302	ENSG00000117114	ADGRL2	CIRL2|CL2|LEC1|LPHH1|LPHN2	adhesion G protein-coupled receptor L2	protein-coding
MACS_peak_5001	chr1	82267163	82267345	+	52.94	NA	promoter-TSS (NM_001366007)	promoter-TSS (NM_001366007)	635	NM_001350698	23266	Hs.24212	NM_012302	ENSG00000117114	ADGRL2	CIRL2|CL2|LEC1|LPHH1|LPHN2	adhesion G protein-coupled receptor L2	protein-coding
MACS_peak_5000	chr1	82266023	82266306	+	113.19	NA	promoter-TSS (NM_001366002)	promoter-TSS (NM_001366002)	82	NM_001297705	23266	Hs.24212	NM_012302	ENSG00000117114	ADGRL2	CIRL2|CL2|LEC1|LPHH1|LPHN2	adhesion G protein-coupled receptor L2	protein-coding
MACS_peak_16131	chr12	1799714	1800322	+	273.63	NA	promoter-TSS (NM_024551)	promoter-TSS (NM_024551)	-218	NM_024551	79602	Hs.371642	NM_024551	ENSG00000006831	ADIPOR2	ACDCR2|PAQR2	adiponectin receptor 2	protein-coding
MACS_peak_10755	chr10	75910740	75911370	+	186.53	NA	promoter-TSS (NR_135191)	promoter-TSS (NR_135191)	76	NM_001369123	132	Hs.656586	NM_001123	ENSG00000156110	ADK	AK	adenosine kinase	protein-coding
MACS_peak_10756	chr10	75935966	75936548	+	220.73	NA	promoter-TSS (NM_001123)	promoter-TSS (NM_001123)	10	NM_001202449	132	Hs.656586	NM_001123	ENSG00000156110	ADK	AK	adenosine kinase	protein-coding
MACS_peak_12152	chr11	10325972	10327071	+	629.12	NA	promoter-TSS (NM_001124)	promoter-TSS (NM_001124)	-99	NM_001124	133	Hs.441047	NM_001124	ENSG00000148926	ADM	AM|PAMP	adrenomedullin	protein-coding
MACS_peak_46825	chr20	49547916	49548515	+	263.65	NA	promoter-TSS (NM_001282531)	promoter-TSS (NM_001282531)	-241	NM_181442	23394	Hs.293736	NM_015339	ENSG00000101126	ADNP	ADNP1|HVDAS|MRD28	activity dependent neuroprotector homeobox	protein-coding
MACS_peak_10471	chr10	64564119	64564357	+	86.91	NA	promoter-TSS (NM_032804)	promoter-TSS (NM_032804)	-242	NM_032804	84890	Hs.99821	NM_032804	ENSG00000181915	ADO	C10orf22	2-aminoethanethiol dioxygenase	protein-coding
MACS_peak_23807	chr15	73075972	73076476	+	293.26	NA	promoter-TSS (NM_001365225)	promoter-TSS (NM_001365225)	-125	NM_001365228	83440	Hs.562587	NM_031284	ENSG00000159322	ADPGK	2610017G09Rik|ADP-GK	ADP dependent glucokinase	protein-coding
MACS_peak_20099	chr13	114103481	114104083	+	229.63	NA	promoter-TSS (NM_199162)	promoter-TSS (NM_199162)	-309	NM_199162	113622	Hs.98669	NM_138430	ENSG00000153531	ADPRHL1	ARH2	ADP-ribosylhydrolase like 1	protein-coding
MACS_peak_3613	chr1	36554265	36554603	+	149	NA	promoter-TSS (NM_017825)	promoter-TSS (NM_017825)	-59	NM_017825	54936	Hs.18021	NM_017825	ENSG00000116863	ADPRHL2	ARH3|CONDSIAS	ADP-ribosylhydrolase like 2	protein-coding
MACS_peak_3612	chr1	36553540	36553731	+	57.16	NA	promoter-TSS (NM_017825)	promoter-TSS (NM_017825)	-858	NM_017825	54936	Hs.18021	NM_017825	ENSG00000116863	ADPRHL2	ARH3|CONDSIAS	ADP-ribosylhydrolase like 2	protein-coding
MACS_peak_30458	chr17	10600569	10601310	+	239.71	NA	promoter-TSS (NM_004589)	promoter-TSS (NM_004589)	28	NM_020233	56985	Hs.47668	NM_020233	ENSG00000170222	ADPRM	C17orf48|MDS006|NBLA03831	ADP-ribose/CDP-alcohol diphosphatase, manganese dependent	protein-coding
MACS_peak_11432	chr10	112836762	112836913	+	50.14	NA	promoter-TSS (NM_000681)	promoter-TSS (NM_000681)	50	NM_000681	150	Hs.249159	NM_000681	ENSG00000150594	ADRA2A	ADRA2|ADRA2R|ADRAR|ALPHA2AAR|ZNF32	adrenoceptor alpha 2A	protein-coding
MACS_peak_63491	chr5	148205268	148206346	+	367.69	NA	promoter-TSS (NM_000024)	promoter-TSS (NM_000024)	-349	NM_000024	154	Hs.2551	NM_000024	ENSG00000169252	ADRB2	ADRB2R|ADRBR|B2AR|BAR|BETA2AR	adrenoceptor beta 2	protein-coding
MACS_peak_47420	chr20	60877480	60878060	+	322.64	NA	promoter-TSS (NM_007002)	promoter-TSS (NM_007002)	-182	NM_001281437	11047	Hs.90107	NM_007002	ENSG00000130706	ADRM1	ARM-1|ARM1|GP110	adhesion regulating molecule 1	protein-coding
MACS_peak_47419	chr20	60876823	60877186	+	132.57	NA	promoter-TSS (NM_001281437)	promoter-TSS (NM_001281437)	-948	NM_001281437	11047	Hs.90107	NM_007002	ENSG00000130706	ADRM1	ARM-1|ARM1|GP110	adhesion regulating molecule 1	protein-coding
MACS_peak_49538	chr22	40741961	40742145	+	52.34	NA	promoter-TSS (NM_001317923)	promoter-TSS (NM_001317923)	-451	NM_001123378	158	Hs.75527	NM_000026	ENSG00000239900	ADSL	AMPS|ASASE|ASL	adenylosuccinate lyase	protein-coding
MACS_peak_49537	chr22	40741695	40741889	+	51.8	NA	promoter-TSS (NM_001317923)	promoter-TSS (NM_001317923)	-712	NM_001123378	158	Hs.75527	NM_000026	ENSG00000239900	ADSL	AMPS|ASASE|ASL	adenylosuccinate lyase	protein-coding
MACS_peak_9581	chr1	244615216	244615556	+	79.47	NA	promoter-TSS (NM_001365073)	promoter-TSS (NM_001365073)	-24	NM_001365073	159	Hs.498313	NM_001126	ENSG00000035687	ADSS	ADEH|ADSS 2|ADSS2	adenylosuccinate synthase	protein-coding
MACS_peak_68977	chr7	44142950	44143181	+	68.44	NA	promoter-TSS (NM_001129)	promoter-TSS (NM_001129)	-879	NM_001129	165	Hs.439463	NM_001129	ENSG00000106624	AEBP1	ACLP	AE binding protein 1	protein-coding
MACS_peak_24849	chr15	89164215	89164486	+	80.16	NA	promoter-TSS (NM_022767)	promoter-TSS (NM_022767)	-221	NM_022767	64782	Hs.436102	NM_022767	ENSG00000181026	AEN	ISG20L1|pp12744	apoptosis enhancing nuclease	protein-coding
MACS_peak_55185	chr4	87856725	87856907	+	59.92	NA	promoter-TSS (NR_038841)	promoter-TSS (NR_038841)	662	NM_001166693	4299	Hs.480190	NM_005935	ENSG00000172493	AFF1	AF4|MLLT2|PBM1	AF4/FMR2 family member 1	protein-coding
MACS_peak_62714	chr5	132298987	132299964	+	482.88	NA	promoter-TSS (NM_014423)	promoter-TSS (NM_014423)	-149	NM_014423	27125	Hs.519313	NM_014423	ENSG00000072364	AFF4	AF5Q31|CHOPS|MCEF	AF4/FMR2 family member 4	protein-coding
MACS_peak_66655	chr6	108615983	108616164	+	53.83	NA	promoter-TSS (NM_001323005)	promoter-TSS (NM_001323005)	-185	NM_001323005	246269	Hs.259666	NM_145315	ENSG00000135537	AFG1L	AFG1|LACE1|c222389	AFG1 like ATPase	protein-coding
MACS_peak_29466	chr16	90038799	90039301	+	199.69	NA	promoter-TSS (NR_003226)	promoter-TSS (NR_003226)	62	NR_003226	172	Hs.534773	NM_001132	ENSG00000223959	AFG3L1P	AFG3|AFG3L1	AFG3 like matrix AAA peptidase subunit 1, pseudogene	pseudo
MACS_peak_42328	chr2	64751270	64751801	+	253.12	NA	promoter-TSS (NM_017657)	promoter-TSS (NM_017657)	73	NM_001002243	54812	Hs.655167	NM_017657	ENSG00000119844	AFTPH	Nbla10388	aftiphilin	protein-coding
MACS_peak_55925	chr4	178363407	178363821	+	183.84	NA	promoter-TSS (NM_001171988)	promoter-TSS (NM_001171988)	-23	NM_000027	175	Hs.207776	NM_000027	ENSG00000038002	AGA	AGU|ASRG|GA	aspartylglucosaminidase	protein-coding
MACS_peak_13114	chr11	47736851	47737206	+	58.89	NA	promoter-TSS (NM_024783)	promoter-TSS (NM_024783)	-107	NM_024783	79841	Hs.147377	NM_024783	ENSG00000165923	AGBL2	CCP2	ATP/GTP binding protein like 2	protein-coding
MACS_peak_41689	chr2	27274102	27274508	+	232.64	NA	promoter-TSS (NR_104246)	promoter-TSS (NR_104246)	14	NR_138023	60509	Hs.138207	NM_021831	ENSG00000084693	AGBL5	CCP5|RP75	ATP/GTP binding protein like 5	protein-coding
MACS_peak_70733	chr7	100136304	100136970	+	236.59	NA	promoter-TSS (NM_006076)	promoter-TSS (NM_006076)	-189	NM_006076	3268	Hs.521083	NM_006076	ENSG00000106351	AGFG2	HRBL|RABR	ArfGAP with FG repeats 2	protein-coding
MACS_peak_71901	chr7	141251092	141251304	+	63.53	NA	promoter-TSS (NM_018238)	promoter-TSS (NM_018238)	-12	NM_001364948	55750	Hs.685880	NM_018238	ENSG00000006530	AGK	CATC5|CTRCT38|MTDPS10|MULK	acylglycerol kinase	protein-coding
MACS_peak_5332	chr1	100315759	100316076	+	123.53	NA	promoter-TSS (NM_000644)	promoter-TSS (NM_000644)	0	NM_000642	178	Hs.904	NM_000028	ENSG00000162688	AGL	GDE	amylo-alpha-1, 6-glucosidase, 4-alpha-glucanotransferase	protein-coding
MACS_peak_5331	chr1	100315374	100315628	+	66.44	NA	promoter-TSS (NM_000644)	promoter-TSS (NM_000644)	-416	NM_000642	178	Hs.904	NM_000028	ENSG00000162688	AGL	GDE	amylo-alpha-1, 6-glucosidase, 4-alpha-glucanotransferase	protein-coding
MACS_peak_74171	chr8	141646072	141646832	+	307.99	NA	promoter-TSS (NM_001164623)	promoter-TSS (NM_001164623)	-720	NM_012154	27161	Hs.660189	NM_012154	ENSG00000123908	AGO2	CASC7|EIF2C2|LINC00980|PPD|Q10	argonaute RISC catalytic component 2	protein-coding
MACS_peak_65733	chr6	32143762	32143984	+	78.92	NA	promoter-TSS (NM_006411).3	promoter-TSS (NM_006411).3	-12	NM_006411	10554	Hs.409230	NM_006411	ENSG00000204310	AGPAT1	1-AGPAT1|G15|LPAAT-alpha|LPAATA	1-acylglycerol-3-phosphate O-acyltransferase 1	protein-coding
MACS_peak_81389	chr9	139582325	139582829	+	213.07	NA	promoter-TSS (NM_001012727)	promoter-TSS (NM_001012727)	-668	NM_001012727	10555	Hs.320151	NM_006412	ENSG00000169692	AGPAT2	1-AGPAT2|BSCL|BSCL1|LPAAB|LPAAT-beta	1-acylglycerol-3-phosphate O-acyltransferase 2	protein-coding
MACS_peak_53421	chr3	148415425	148415752	+	98.4	NA	promoter-TSS (NM_000685)	promoter-TSS (NM_000685)	-70	NM_000685	185	Hs.477887	NM_000685	ENSG00000144891	AGTR1	AG2S|AGTR1B|AT1|AT1AR|AT1B|AT1BR|AT1R|AT2R1|HAT1R	angiotensin II receptor type 1	protein-coding
MACS_peak_1331	chr1	11795967	11796291	+	80.42	NA	promoter-TSS (NM_001040197)	promoter-TSS (NM_001040197)	-13	NM_001040194	57085	Hs.464438	NM_020350	ENSG00000177674	AGTRAP	ATRAP	angiotensin II receptor associated protein	protein-coding
MACS_peak_9679	chr1	247095176	247095873	+	450.56	NA	promoter-TSS (NM_001323342)	promoter-TSS (NM_001323342)	-274	NR_136586	25909	Hs.300887	NM_015446	ENSG00000153207	AHCTF1	ELYS|MST108|MSTP108|TMBS62	AT-hook containing transcription factor 1	protein-coding
MACS_peak_45685	chr20	32890714	32891485	+	453.48	NA	promoter-TSS (NM_001362750)	promoter-TSS (NM_001362750)	62	NM_001362750	191	Hs.388004	NM_000687	ENSG00000101444	AHCY	SAHH|adoHcyase	adenosylhomocysteinase	protein-coding
MACS_peak_5547	chr1	110526734	110527838	+	435.21	NA	promoter-TSS (NM_006621)	promoter-TSS (NM_006621)	-101	NM_006621	10768	Hs.743973	NM_006621	ENSG00000168710	AHCYL1	DCAL|IRBIT|PPP1R78|PRO0233|XPVKONA	adenosylhomocysteinase like 1	protein-coding
MACS_peak_71587	chr7	128864299	128864785	+	181.65	NA	promoter-TSS (NM_015328)	promoter-TSS (NM_015328)	-329	NM_001130720	23382	Hs.600789	NM_015328	ENSG00000158467	AHCYL2	ADOHCYASE3|IRBIT2	adenosylhomocysteinase like 2	protein-coding
MACS_peak_13623	chr11	62314447	62314687	+	71.51	NA	promoter-TSS (NM_024060)	promoter-TSS (NM_024060)	-289	NM_024060	79026	Hs.502756	NM_001620	ENSG00000124942	AHNAK	AHNAKRS|PM227	AHNAK nucleoprotein	protein-coding
MACS_peak_13625	chr11	62315115	62315406	+	70.09	NA	promoter-TSS (NM_024060)	promoter-TSS (NM_024060)	-982	NM_024060	79026	Hs.502756	NM_001620	ENSG00000124942	AHNAK	AHNAKRS|PM227	AHNAK nucleoprotein	protein-coding
MACS_peak_13624	chr11	62314709	62314920	+	62.84	NA	promoter-TSS (NM_024060)	promoter-TSS (NM_024060)	-536	NM_024060	79026	Hs.502756	NM_001620	ENSG00000124942	AHNAK	AHNAKRS|PM227	AHNAK nucleoprotein	protein-coding
MACS_peak_13621	chr11	62312920	62313602	+	375.41	NA	promoter-TSS (NM_001346446)	promoter-TSS (NM_001346446)	37	NM_001346445	79026	Hs.502756	NM_001620	ENSG00000124942	AHNAK	AHNAKRS|PM227	AHNAK nucleoprotein	protein-coding
MACS_peak_13622	chr11	62313786	62314056	+	84.85	NA	promoter-TSS (NM_001346446)	promoter-TSS (NM_001346446)	357	NM_001620	79026	Hs.502756	NM_001620	ENSG00000124942	AHNAK	AHNAKRS|PM227	AHNAK nucleoprotein	protein-coding
MACS_peak_21557	chr14	105436694	105437186	+	217.82	NA	promoter-TSS (NM_001350929)	promoter-TSS (NM_001350929)	-96	NM_001350929	113146	Hs.441783	NM_138420	ENSG00000185567	AHNAK2	C14orf78	AHNAK nucleoprotein 2	protein-coding
MACS_peak_21084	chr14	77924614	77925011	+	168.96	NA	promoter-TSS (NM_001193314)	promoter-TSS (NM_001193314)	376	NM_012111	10598	Hs.204041	NM_012111	ENSG00000100591	AHSA1	AHA1|C14orf3|hAha1|p38	activator of HSP90 ATPase activity 1	protein-coding
MACS_peak_21083	chr14	77924245	77924599	+	111.03	NA	promoter-TSS (NM_001193314)	promoter-TSS (NM_001193314)	-14	NM_012111	10598	Hs.204041	NM_012111	ENSG00000100591	AHSA1	AHA1|C14orf3|hAha1|p38	activator of HSP90 ATPase activity 1	protein-coding
MACS_peak_42259	chr2	61404071	61404274	+	74.95	NA	promoter-TSS (NR_152211)	promoter-TSS (NR_152211)	-381	NR_152212	130872	Hs.655602	NM_152392	ENSG00000173209	AHSA2P	AHA1|AHSA2|Hch1	activator of HSP90 ATPase homolog 2, pseudogene	pseudo
MACS_peak_28345	chr16	31538510	31538654	+	52.4	NA	promoter-TSS (NM_001318222)	promoter-TSS (NM_001318222)	-639	NM_001318221	51327	Hs.274309	NM_016633	ENSG00000169877	AHSP	EDRF|ERAF	alpha hemoglobin stabilizing protein	protein-coding
MACS_peak_8729	chr1	222884822	222885641	+	325.97	NA	promoter-TSS (NM_001288579)	promoter-TSS (NM_001288579)	602	NM_022831	64853	Hs.156625	NM_022831	ENSG00000186063	AIDA	C1orf80	axin interactor, dorsalization associated	protein-coding
MACS_peak_79658	chr9	133970843	133971124	+	53.62	NA	promoter-TSS (NM_001185096)	promoter-TSS (NM_001185096)	-880	NM_001185095	83543	Hs.4944	NM_031426	ENSG00000126878	AIF1L	C9orf58|IBA2	allograft inflammatory factor 1 like	protein-coding
MACS_peak_82973	chrX	129299860	129300124	+	105.62	NA	promoter-TSS (NM_004208)	promoter-TSS (NM_004208)	-131	NM_145812	9131	Hs.424932	NM_004208	ENSG00000156709	AIFM1	AIF|CMT2D|CMTX4|COWCK|COXPD6|DFNX5|NADMR|NAMSD|PDCD8	apoptosis inducing factor mitochondria associated 1	protein-coding
MACS_peak_82974	chrX	129300166	129300347	+	62.9	NA	promoter-TSS (NM_004208)	promoter-TSS (NM_004208)	-395	NM_145812	9131	Hs.424932	NM_004208	ENSG00000156709	AIFM1	AIF|CMT2D|CMTX4|COWCK|COXPD6|DFNX5|NADMR|NAMSD|PDCD8	apoptosis inducing factor mitochondria associated 1	protein-coding
MACS_peak_10570	chr10	71892464	71892739	+	112.64	NA	promoter-TSS (NM_001198696)	promoter-TSS (NM_001198696)	-20	NM_032797	84883	Hs.650680	NM_032797	ENSG00000042286	AIFM2	AMID|PRG3	apoptosis inducing factor mitochondria associated 2	protein-coding
MACS_peak_66984	chr6	143381512	143381893	+	113.62	NA	promoter-TSS (NM_001363721)	promoter-TSS (NM_001363721)	102	NR_158896	51390	Hs.567501	NM_016108	ENSG00000146416	AIG1	AIG-1|dJ95L4.1	androgen induced 1	protein-coding
MACS_peak_14742	chr11	67249765	67249927	+	70.27	NA	promoter-TSS (NM_003977)	promoter-TSS (NM_003977)	-651	NM_001302960	9049	Hs.412433	NM_003977	ENSG00000110711	AIP	ARA9|FKBP16|FKBP37|PITA1|SMTPHN|XAP-2|XAP2	aryl hydrocarbon receptor interacting protein	protein-coding
MACS_peak_14743	chr11	67250141	67251272	+	453.91	NA	promoter-TSS (NM_001302959)	promoter-TSS (NM_001302959)	209	NM_003977	9049	Hs.412433	NM_003977	ENSG00000110711	AIP	ARA9|FKBP16|FKBP37|PITA1|SMTPHN|XAP-2|XAP2	aryl hydrocarbon receptor interacting protein	protein-coding
MACS_peak_81502	chr9	139736413	139737245	+	374.98	NA	promoter-TSS (NM_001080482)	promoter-TSS (NM_001080482)	-101	NM_001080482	389813		NM_001080482	ENSG00000232434	AJM1	C9orf172|ajm-1	apical junction component 1 homolog	protein-coding
MACS_peak_20229	chr14	23451826	23452230	+	104.7	NA	promoter-TSS (NM_032876)	promoter-TSS (NM_032876)	-268	NM_001289097	84962	Hs.655832	NM_032876	ENSG00000129474	AJUBA	JUB	ajuba LIM protein	protein-coding
MACS_peak_78242	chr9	130636006	130636664	+	172.41	NA	promoter-TSS (NM_001318122)	promoter-TSS (NM_001318122)	-576	NM_001318122	203	Hs.175473	NM_000476	ENSG00000106992	AK1	HTL-S-58j	adenylate kinase 1	protein-coding
MACS_peak_78247	chr9	130639895	130640215	+	80.13	NA	promoter-TSS (NM_000476)	promoter-TSS (NM_000476)	-33	NM_000476	203	Hs.175473	NM_000476	ENSG00000106992	AK1	HTL-S-58j	adenylate kinase 1	protein-coding
MACS_peak_3515	chr1	33502286	33502768	+	240.43	NA	promoter-TSS (NR_134976)	promoter-TSS (NR_134976)	-15	NM_001319143	204	Hs.470907	NM_001625	ENSG00000004455	AK2	ADK2	adenylate kinase 2	protein-coding
MACS_peak_75418	chr9	4741123	4741293	+	57.89	NA	promoter-TSS (NM_016282)	promoter-TSS (NM_016282)	-6	NM_001199852	50808	Hs.732022	NM_016282	ENSG00000147853	AK3	AK3L1|AK6|AKL3L|AKL3L1|FIX	adenylate kinase 3	protein-coding
MACS_peak_4825	chr1	65614100	65614257	+	51.95	NA	promoter-TSS (NM_001330616)	promoter-TSS (NM_001330616)	292	NM_013410	205	Hs.10862	NM_013410	ENSG00000162433	AK4	AK 4|AK3|AK3L1|AK3L2	adenylate kinase 4	protein-coding
MACS_peak_33623	chr17	55162130	55162510	+	150.43	NA	promoter-TSS (NM_003488)	promoter-TSS (NM_003488)	-287	NM_003488	8165	Hs.463506	NM_003488	ENSG00000121057	AKAP1	AKAP|AKAP121|AKAP149|AKAP84|D-AKAP1|PPP1R43|PRKA1|SAKAP84|TDRD17	A-kinase anchoring protein 1	protein-coding
MACS_peak_31032	chr17	19881061	19881532	+	176.36	NA	promoter-TSS (NM_001330152)	promoter-TSS (NM_001330152)	-127	NM_001330152	11216	Hs.642676	NM_007202	ENSG00000108599	AKAP10	AKAP-10|D-AKAP-2|D-AKAP2|PRKA10	A-kinase anchoring protein 10	protein-coding
MACS_peak_31033	chr17	19881984	19882107	+	52.87	NA	promoter-TSS (NM_001330152)	promoter-TSS (NM_001330152)	-876	NM_001330152	11216	Hs.642676	NM_007202	ENSG00000108599	AKAP10	AKAP-10|D-AKAP-2|D-AKAP2|PRKA10	A-kinase anchoring protein 10	protein-coding
MACS_peak_19474	chr13	42845708	42846069	+	113.45	NA	promoter-TSS (NM_016248)	promoter-TSS (NM_016248)	-400	NM_016248	11215	Hs.105105	NM_016248	ENSG00000023516	AKAP11	AKAP-11|AKAP220|PPP1R44|PRKA11	A-kinase anchoring protein 11	protein-coding
MACS_peak_38802	chr19	15490522	15490805	+	120.24	NA	promoter-TSS (NM_005858)	promoter-TSS (NM_005858)	-65	NM_005858	10270	Hs.594496	NM_005858	ENSG00000105127	AKAP8	AKAP 95|AKAP-8|AKAP-95|AKAP95	A-kinase anchoring protein 8	protein-coding
MACS_peak_70433	chr7	91569859	91570283	+	147.98	NA	promoter-TSS (NM_005751)	promoter-TSS (NM_005751)	-105	NM_147185	10142	Hs.651221	NM_005751	ENSG00000127914	AKAP9	AKAP-9|AKAP350|AKAP450|CG-NAP|HYPERION|LQT11|MU-RMS-40.16A|PPP1R45|PRKA9|YOTIAO	A-kinase anchoring protein 9	protein-coding
MACS_peak_12054	chr11	8932678	8933205	+	258.65	NA	promoter-TSS (NM_005418)	promoter-TSS (NM_005418)	205	NM_001206648	56672	Hs.131180	NM_020642	ENSG00000166452	AKIP1	BCA3|C11orf17	A-kinase interacting protein 1	protein-coding
MACS_peak_3766	chr1	39456755	39457067	+	113.38	NA	promoter-TSS (NM_001136275)	promoter-TSS (NM_001136275)	-5	NM_001136275	79647	Hs.293563	NM_024595	ENSG00000174574	AKIRIN1	C1orf108|STRF2	akirin 1	protein-coding
MACS_peak_4205	chr1	46016094	46016893	+	390.36	NA	promoter-TSS (NM_001202413)	promoter-TSS (NM_001202413)	-5	NM_006066	10327	Hs.474584	NM_006066	ENSG00000117448	AKR1A1	ALDR1|ALR|ARM|DD3|HEL-S-6	aldo-keto reductase family 1 member A1	protein-coding
MACS_peak_71773	chr7	134143760	134144048	+	109.99	NA	promoter-TSS (NM_001628)	promoter-TSS (NM_001628)	40	NR_144376	231	Hs.521212	NM_001628	ENSG00000085662	AKR1B1	ADR|ALDR1|ALR2|AR	aldo-keto reductase family 1 member B	protein-coding
MACS_peak_2152	chr1	19638283	19638698	+	123.75	NA	promoter-TSS (NM_017765)	promoter-TSS (NM_017765)	150	NM_001320979	8574	Hs.571886	NM_003689	ENSG00000053371	AKR7A2	AFAR|AFAR1|AFB1-AR1|AKR7	aldo-keto reductase family 7 member A2	protein-coding
MACS_peak_40893	chr19	50381393	50381685	+	96.08	NA	promoter-TSS (NM_032375)	promoter-TSS (NM_032375)	74	NM_001278160	84335	Hs.515542	NM_032375	ENSG00000204673	AKT1S1	Lobe|PRAS40	AKT1 substrate 1	protein-coding
MACS_peak_40891	chr19	50379310	50379629	+	156.79	NA	promoter-TSS (NM_001278159)	promoter-TSS (NM_001278159)	37	NM_001278159	84335	Hs.515542	NM_032375	ENSG00000204673	AKT1S1	Lobe|PRAS40	AKT1 substrate 1	protein-coding
MACS_peak_40892	chr19	50379765	50381210	+	733.28	NA	promoter-TSS (NM_001168222)	promoter-TSS (NM_001168222)	125	NM_001098633	84335	Hs.515542	NM_032375	ENSG00000204673	AKT1S1	Lobe|PRAS40	AKT1 substrate 1	protein-coding
MACS_peak_39795	chr19	40791295	40791777	+	179.28	NA	promoter-TSS (NM_001626)	promoter-TSS (NM_001626)	-284	NM_001243027	208	Hs.631535	NM_001626	ENSG00000105221	AKT2	HIHGHH|PKBB|PKBBETA|PRKBB|RAC-BETA	AKT serine/threonine kinase 2	protein-coding
MACS_peak_77041	chr9	116163391	116163934	+	217.85	NA	promoter-TSS (NM_000031)	promoter-TSS (NM_000031)	-44	NM_001003945	210	Hs.1227	NM_000031	ENSG00000148218	ALAD	ALADH|PBGS	aminolevulinate dehydratase	protein-coding
MACS_peak_52304	chr3	52232008	52232468	+	228.4	NA	promoter-TSS (NM_000688)	promoter-TSS (NM_000688)	62	NM_000688	211	Hs.476308	NM_000688	ENSG00000023330	ALAS1	ALAS|ALAS-H|ALAS3|ALASH|MIG4	5'-aminolevulinate synthase 1	protein-coding
MACS_peak_52789	chr3	105085653	105085826	+	76.77	NA	promoter-TSS (NM_001627)	promoter-TSS (NM_001627)	-14	NM_001243280	214	Hs.591293	NM_001627	ENSG00000170017	ALCAM	CD166|MEMD	activated leukocyte cell adhesion molecule	protein-coding
MACS_peak_52788	chr3	105085004	105085610	+	273.53	NA	promoter-TSS (NM_001243281)	promoter-TSS (NM_001243281)	-250	NM_001243281	214	Hs.591293	NM_001627	ENSG00000170017	ALCAM	CD166|MEMD	activated leukocyte cell adhesion molecule	protein-coding
MACS_peak_11078	chr10	97416414	97416739	+	125.65	NA	promoter-TSS (NM_001323412)	promoter-TSS (NM_001323412)	-108	NM_002860	5832	Hs.500645	NM_002860	ENSG00000059573	ALDH18A1	ADCL3|ARCL3A|GSAS|P5CS|PYCS|SPG9|SPG9A|SPG9B	aldehyde dehydrogenase 18 family member A1	protein-coding
MACS_peak_22914	chr15	58358646	58358937	+	61.69	NA	promoter-TSS (NM_001206897)	promoter-TSS (NM_001206897)	-670	NM_001206897	8854	Hs.643455	NM_003888	ENSG00000128918	ALDH1A2	RALDH(II)|RALDH2|RALDH2-T	aldehyde dehydrogenase 1 family member A2	protein-coding
MACS_peak_76124	chr9	38392457	38392837	+	109.11	NA	promoter-TSS (NM_000692)	promoter-TSS (NM_000692)	-52	NM_000692	219	Hs.436219	NM_000692	ENSG00000137124	ALDH1B1	ALDH5|ALDHX	aldehyde dehydrogenase 1 family member B1	protein-coding
MACS_peak_53020	chr3	125899652	125899823	+	50.48	NA	promoter-TSS (NM_012190)	promoter-TSS (NM_012190)	292	NM_001270364	10840	Hs.434435	NM_012190	ENSG00000144908	ALDH1L1	10-FTHFDH|10-fTHF|FDH|FTHFD	aldehyde dehydrogenase 1 family member L1	protein-coding
MACS_peak_18697	chr12	112203920	112204082	+	53.2	NA	promoter-TSS (NM_000690)	promoter-TSS (NM_000690)	-736	NM_001204889	217	Hs.604551	NM_000690	ENSG00000111275	ALDH2	ALDH-E2|ALDHI|ALDM	aldehyde dehydrogenase 2 family member	protein-coding
MACS_peak_31015	chr17	19648505	19649077	+	271.16	NA	promoter-TSS (NM_001135168)	promoter-TSS (NM_001135168)	-19	NM_001135168	218	Hs.531682	NM_000691	ENSG00000108602	ALDH3A1	ALDH3|ALDHIII	aldehyde dehydrogenase 3 family member A1	protein-coding
MACS_peak_31016	chr17	19651896	19652130	+	60.37	NA	promoter-TSS (NM_000691)	promoter-TSS (NM_000691)	-402	NM_001330150	218	Hs.531682	NM_000691	ENSG00000108602	ALDH3A1	ALDH3|ALDHIII	aldehyde dehydrogenase 3 family member A1	protein-coding
MACS_peak_31008	chr17	19551039	19551978	+	322.34	NA	promoter-TSS (NM_000382)	promoter-TSS (NM_000382)	45	NM_001369137	224	Hs.499886	NM_000382	ENSG00000072210	ALDH3A2	ALDH10|FALDH|SLS	aldehyde dehydrogenase 3 family member A2	protein-coding
MACS_peak_14834	chr11	67777370	67777728	+	165.95	NA	promoter-TSS (NM_001290058)	promoter-TSS (NM_001290058)	-248	NM_001290059	221	Hs.523841	NM_000694	ENSG00000006534	ALDH3B1	ALDH4|ALDH7	aldehyde dehydrogenase 3 family member B1	protein-coding
MACS_peak_14833	chr11	67776857	67777065	+	51.58	NA	promoter-TSS (NM_001290058)	promoter-TSS (NM_001290058)	-836	NM_001290059	221	Hs.523841	NM_000694	ENSG00000006534	ALDH3B1	ALDH4|ALDH7	aldehyde dehydrogenase 3 family member B1	protein-coding
MACS_peak_14831	chr11	67775862	67776102	+	81.08	NA	promoter-TSS (NM_001161473)	promoter-TSS (NM_001161473)	-35	NM_001161473	221	Hs.523841	NM_000694	ENSG00000006534	ALDH3B1	ALDH4|ALDH7	aldehyde dehydrogenase 3 family member B1	protein-coding
MACS_peak_2104	chr1	19229001	19229184	+	70.59	NA	promoter-TSS (NM_170726)	promoter-TSS (NM_170726)	-43	NM_003748	8659	Hs.77448	NM_003748	ENSG00000159423	ALDH4A1	ALDH4|P5CD|P5CDh	aldehyde dehydrogenase 4 family member A1	protein-coding
MACS_peak_2105	chr1	19229198	19229744	+	202.44	NA	promoter-TSS (NM_001319218)	promoter-TSS (NM_001319218)	-178	NM_001319218	8659	Hs.77448	NM_003748	ENSG00000159423	ALDH4A1	ALDH4|P5CD|P5CDh	aldehyde dehydrogenase 4 family member A1	protein-coding
MACS_peak_20957	chr14	74550813	74551440	+	230.14	NA	promoter-TSS (NM_001024674)	promoter-TSS (NM_001024674)	30	NM_001278594	4329	Hs.293970	NM_005589	ENSG00000119711	ALDH6A1	MMSADHA|MMSDH	aldehyde dehydrogenase 6 family member A1	protein-coding
MACS_peak_62525	chr5	125931788	125931965	+	50.84	NA	promoter-TSS (NM_001201377)	promoter-TSS (NM_001201377)	-965	NM_001182	501	Hs.483239	NM_001182	ENSG00000164904	ALDH7A1	ATQ1|EPD|PDE	aldehyde dehydrogenase 7 family member A1	protein-coding
MACS_peak_7277	chr1	165667109	165667489	+	151.35	NA	promoter-TSS (NR_036683)	promoter-TSS (NR_036683)	500	NM_001365774	223	Hs.2533	NM_000696	ENSG00000143149	ALDH9A1	ALDH4|ALDH7|ALDH9|E3|TMABADH	aldehyde dehydrogenase 9 family member A1	protein-coding
MACS_peak_28076	chr16	30075771	30075942	+	60.76	NA	promoter-TSS (NM_001127617)	promoter-TSS (NM_001127617)	38	NM_001127617	226	Hs.513490	NM_000034	ENSG00000149925	ALDOA	ALDA|GSD12|HEL-S-87p	aldolase, fructose-bisphosphate A	protein-coding
MACS_peak_26675	chr16	5121700	5122260	+	237.99	NA	promoter-TSS (NM_001330504)	promoter-TSS (NM_001330504)	170	NM_019109	56052	Hs.592086	NM_019109	ENSG00000033011	ALG1	CDG1K|HMAT1|HMT-1|HMT1|MT-1|Mat-1|hMat-1	ALG1 chitobiosyldiphosphodolichol beta-mannosyltransferase	protein-coding
MACS_peak_16929	chr12	34175135	34175507	+	178.75	NA	promoter-TSS (NM_032834)	promoter-TSS (NM_032834)	-110	NM_032834	84920	Hs.102971	NM_032834	ENSG00000139133	ALG10	ALG10A|DIE2|KCR1	ALG10 alpha-1,2-glucosyltransferase	protein-coding
MACS_peak_16941	chr12	38710273	38711032	+	372.31	NA	promoter-TSS (NM_001308340)	promoter-TSS (NM_001308340)	76	NM_001013620	144245	Hs.259305	NM_001013620	ENSG00000175548	ALG10B	ALG10|KCR1	ALG10 alpha-1,2-glucosyltransferase B	protein-coding
MACS_peak_50496	chr22	50311784	50312168	+	159.73	NA	promoter-TSS (NM_024324)	promoter-TSS (NM_024324)	110	NM_024105	79087	Hs.526711	NM_024105	ENSG00000182858	ALG12	CDG1G|ECM39|PP14673|hALG12	ALG12 alpha-1,6-mannosyltransferase	protein-coding
MACS_peak_82822	chrX	110924807	110924958	+	50.14	NA	promoter-TSS (NM_001324294)	promoter-TSS (NM_001324294)	-3	NM_001257239	79868	Hs.443061	NM_018466	ENSG00000101901	ALG13	CDG1S|CXorf45|EIEE36|GLT28D1|MDS031|TDRD13|YGL047W	ALG13 UDP-N-acetylglucosaminyltransferase subunit	protein-coding
MACS_peak_82821	chrX	110924345	110924520	+	76	NA	promoter-TSS (NM_001257234)	promoter-TSS (NM_001257234)	34	NM_001257230	79868	Hs.443061	NM_018466	ENSG00000101901	ALG13	CDG1S|CXorf45|EIEE36|GLT28D1|MDS031|TDRD13|YGL047W	ALG13 UDP-N-acetylglucosaminyltransferase subunit	protein-coding
MACS_peak_76834	chr9	101984137	101984292	+	55.45	NA	promoter-TSS (NM_033087)	promoter-TSS (NM_033087)	10	NM_033087	85365	Hs.40919	NM_033087	ENSG00000119523	ALG2	CDG1I|CDGIi|CMS14|CMSTA3|NET38|hALPG2	ALG2 alpha-1,3/1,6-mannosyltransferase	protein-coding
MACS_peak_53843	chr3	183966406	183966838	+	174.31	NA	promoter-TSS (NM_032331)	promoter-TSS (NM_032331)	128	NM_005787	10195	Hs.478481	NM_005787	ENSG00000214160	ALG3	CDG1D|CDGS4|CDGS6|D16Ertd36e|NOT56L|Not56|not	ALG3 alpha-1,3- mannosyltransferase	protein-coding
MACS_peak_19442	chr13	37573370	37573519	+	50.78	NA	promoter-TSS (NM_001142364)	promoter-TSS (NM_001142364)	33	NM_013338	29880	Hs.507769	NM_013338	ENSG00000120697	ALG5	bA421P11.2	ALG5 dolichyl-phosphate beta-glucosyltransferase	protein-coding
MACS_peak_4786	chr1	63833066	63833453	+	181.15	NA	promoter-TSS (NM_013339)	promoter-TSS (NM_013339)	-39	NM_013339	29929	Hs.258501	NM_013339	ENSG00000088035	ALG6	CDG1C	ALG6 alpha-1,3-glucosyltransferase	protein-coding
MACS_peak_15608	chr11	77850267	77850866	+	367.81	NA	promoter-TSS (NR_102280)	promoter-TSS (NR_102280)	106	NM_024079	79053	Hs.503368	NM_024079	ENSG00000159063	ALG8	CDG1H|PCLD3	ALG8 alpha-1,3-glucosyltransferase	protein-coding
MACS_peak_15889	chr11	111741996	111742126	+	57.37	NA	promoter-TSS (NM_001352415)	promoter-TSS (NM_001352415)	-37	NM_001352423	79796	Hs.745155	NM_024740	ENSG00000086848	ALG9	CDG1L|DIBD1|GIKANIS|LOH11CR1J	ALG9 alpha-1,2-mannosyltransferase	protein-coding
MACS_peak_21093	chr14	78174049	78174574	+	133.46	NA	promoter-TSS (NM_001267864)	promoter-TSS (NM_001267864)	55	NM_006020	8846	Hs.94542	NM_006020	ENSG00000100601	ALKBH1	ABH|ABH1|ALKBH|alkB|hABH	alkB homolog 1, histone H2A dioxygenase	protein-coding
MACS_peak_18576	chr12	109531048	109531641	+	188.27	NA	promoter-TSS (NM_001001655)	promoter-TSS (NM_001001655)	-51	NM_001205180	121642	Hs.374458	NM_001001655	ENSG00000189046	ALKBH2	ABH2	alkB homolog 2, alpha-ketoglutarate dependent dioxygenase	protein-coding
MACS_peak_12683	chr11	43902171	43902508	+	99.25	NA	promoter-TSS (NM_139178)	promoter-TSS (NM_139178)	-42	NM_139178	221120	Hs.720708	NM_139178	ENSG00000166199	ALKBH3	ABH3|DEPC-1|DEPC1|PCA1|hABH3	alkB homolog 3, alpha-ketoglutaratedependent dioxygenase	protein-coding
MACS_peak_71025	chr7	102104707	102105701	+	391.18	NA	promoter-TSS (NM_152892)	promoter-TSS (NM_152892)	106	NM_017621	54784	Hs.658598	NM_017621	ENSG00000160993	ALKBH4	ABH4	alkB homolog 4, lysine demethylase	protein-coding
MACS_peak_30813	chr17	18086707	18087288	+	250.97	NA	promoter-TSS (NM_017758)	promoter-TSS (NM_017758)	-145	NM_017758	54890	Hs.744130	NM_017758	ENSG00000091542	ALKBH5	ABH5|OFOXD|OFOXD1	alkB homolog 5, RNA demethylase	protein-coding
MACS_peak_30812	chr17	18086240	18086676	+	164.68	NA	promoter-TSS (NM_017758)	promoter-TSS (NM_017758)	-684	NM_017758	54890	Hs.744130	NM_017758	ENSG00000091542	ALKBH5	ABH5|OFOXD|OFOXD1	alkB homolog 5, RNA demethylase	protein-coding
MACS_peak_39464	chr19	36504823	36505068	+	78.51	NA	promoter-TSS (NM_001290056)	promoter-TSS (NM_001290056)	170	NM_001297701	84964	Hs.71941	NM_032878	ENSG00000239382	ALKBH6	ABH6	alkB homolog 6	protein-coding
MACS_peak_37642	chr19	6371884	6372052	+	51.37	NA	promoter-TSS (NM_032306)	promoter-TSS (NM_032306)	-837	NM_032306	84266	Hs.111099	NM_032306	ENSG00000125652	ALKBH7	ABH7|SPATA11|UNQ6002	alkB homolog 7	protein-coding
MACS_peak_30320	chr17	8021710	8022611	+	348.4	NA	promoter-TSS (NM_001369446)	promoter-TSS (NM_001369446)	74	NM_001165960	59344	Hs.232770	NM_021628	ENSG00000179148	ALOXE3	ARCI3|E-LOX|eLOX-3|eLOX3	arachidonate lipoxygenase 3	protein-coding
MACS_peak_45066	chr2	233243370	233243547	+	61.53	NA	promoter-TSS (NM_001632)	promoter-TSS (NM_001632)	-3	NM_001632	250	Hs.284255	NM_001632	ENSG00000163283	ALPP	ALP|ALPI|IAP|PALP|PLAP|PLAP-1	alkaline phosphatase, placental	protein-coding
MACS_peak_44256	chr2	202645515	202645983	+	135.9	NA	promoter-TSS (NM_001135745)	promoter-TSS (NM_001135745)	-93	NM_001135745	57679	Hs.471096	NM_020919	ENSG00000003393	ALS2	ALS2CR6|ALSJ|IAHSP|PLSJ	alsin Rho guanine nucleotide exchange factor ALS2	protein-coding
MACS_peak_51677	chr3	46734206	46734482	+	104.77	NA	promoter-TSS (NM_001370524)	promoter-TSS (NM_001370524)	825	NM_001190707	259173	Hs.517937	NM_147129	ENSG00000178038	ALS2CL	RN49018	ALS2 C-terminal like	protein-coding
MACS_peak_51678	chr3	46734706	46734945	+	97.94	NA	promoter-TSS (NM_001370524)	promoter-TSS (NM_001370524)	344	NM_001190707	259173	Hs.517937	NM_147129	ENSG00000178038	ALS2CL	RN49018	ALS2 C-terminal like	protein-coding
MACS_peak_60293	chr5	34007552	34008697	+	441.84	NA	promoter-TSS (NM_014324)	promoter-TSS (NM_014324)	31	NM_001167595	23600	Hs.508343	NM_014324	ENSG00000242110	AMACR	AMACRD|CBAS4|P504S|RACE|RM	alpha-methylacyl-CoA racemase	protein-coding
MACS_peak_12835	chr11	46615513	46615771	+	83.7	NA	promoter-TSS (NM_001367469)	promoter-TSS (NM_001367469)	-69	NM_001267782	55626	Hs.654644	NM_017749	ENSG00000110497	AMBRA1	DCAF3|WDR94	autophagy and beclin 1 regulator 1	protein-coding
MACS_peak_66696	chr6	111195375	111196068	+	296.53	NA	promoter-TSS (NM_001287214)	promoter-TSS (NM_001287214)	-266	NM_001287216	262	Hs.159118	NM_001634	ENSG00000123505	AMD1	ADOMETDC|AMD|SAMDC	adenosylmethionine decarboxylase 1	protein-coding
MACS_peak_26135	chr16	2570265	2570455	+	57.46	NA	promoter-TSS (NM_001330449)	promoter-TSS (NM_001330449)	-12	NM_015944	51005	Hs.740430	NM_015944	ENSG00000162066	AMDHD2	CGI-14	amidohydrolase domain containing 2	protein-coding
MACS_peak_82646	chrX	63425609	63426011	+	174.17	NA	promoter-TSS (NM_152424)	promoter-TSS (NM_152424)	-222	NM_152424	139285	Hs.314225	NM_152424	ENSG00000184675	AMER1	FAM123B|OSCS|WTX	APC membrane recruitment protein 1	protein-coding
MACS_peak_5490	chr1	110052954	110053170	+	63.76	NA	promoter-TSS (NM_020703)	promoter-TSS (NM_020703)	-713	NM_020703	57463	Hs.12264	NM_020703	ENSG00000181754	AMIGO1	ALI2|AMIGO|AMIGO-1	adhesion molecule with Ig like domain 1	protein-coding
MACS_peak_17029	chr12	47473808	47474441	+	223.96	NA	promoter-TSS (NM_001143668)	promoter-TSS (NM_001143668)	-382	NM_001370299	347902	Hs.121520	NM_181847	ENSG00000139211	AMIGO2	ALI1|AMIGO-2|DEGA	adhesion molecule with Ig like domain 2	protein-coding
MACS_peak_82820	chrX	109561186	109561337	+	50.14	NA	promoter-TSS (NM_001025580)	promoter-TSS (NM_001025580)	52	NM_015365	9949	Hs.656243	NM_015365	ENSG00000101935	AMMECR1	AMMERC1|MFHIEN	Alport syndrome, mental retardation, midface hypoplasia and elliptocytosis chromosomal region gene 1	protein-coding
MACS_peak_15774	chr11	94501138	94501472	+	129.45	NA	promoter-TSS (NM_001301007)	promoter-TSS (NM_001301007)	-217	NM_130847	154810	Hs.503594	NM_130847	ENSG00000166025	AMOTL1	JEAP	angiomotin like 1	protein-coding
MACS_peak_53246	chr3	134093763	134094157	+	147.21	NA	promoter-TSS (NM_001363943)	promoter-TSS (NM_001363943)	-208	NM_001363943	51421	Hs.426312	NM_016201	ENSG00000114019	AMOTL2	LCCP	angiomotin like 2	protein-coding
MACS_peak_53245	chr3	134093260	134093491	+	97.42	NA	promoter-TSS (NM_001278685)	promoter-TSS (NM_001278685)	-86	NM_001278685	51421	Hs.426312	NM_016201	ENSG00000114019	AMOTL2	LCCP	angiomotin like 2	protein-coding
MACS_peak_5494	chr1	110162282	110162557	+	66.48	NA	promoter-TSS (NM_139156)	promoter-TSS (NM_139156)	-16	NM_139156	271	Hs.82927	NM_004037	ENSG00000116337	AMPD2	PCH9|SPG63	adenosine monophosphate deaminase 2	protein-coding
MACS_peak_5495	chr1	110162916	110163229	+	81.21	NA	promoter-TSS (NM_001308170)	promoter-TSS (NM_001308170)	-464	NM_001308170	271	Hs.82927	NM_004037	ENSG00000116337	AMPD2	PCH9|SPG63	adenosine monophosphate deaminase 2	protein-coding
MACS_peak_5496	chr1	110163370	110163510	+	53.19	NA	promoter-TSS (NM_001308170)	promoter-TSS (NM_001308170)	-96	NM_001308170	271	Hs.82927	NM_004037	ENSG00000116337	AMPD2	PCH9|SPG63	adenosine monophosphate deaminase 2	protein-coding
MACS_peak_5497	chr1	110166209	110166426	+	62.63	NA	promoter-TSS (NM_001257361)	promoter-TSS (NM_001257361)	-293	NM_001257361	271	Hs.82927	NM_004037	ENSG00000116337	AMPD2	PCH9|SPG63	adenosine monophosphate deaminase 2	protein-coding
MACS_peak_43198	chr2	112641631	112641806	+	75.8	NA	promoter-TSS (NM_022662)	promoter-TSS (NM_022662)	52	NM_022662	64682	Hs.436527	NM_022662	ENSG00000153107	ANAPC1	APC1|MCPR|TSG24	anaphase promoting complex subunit 1	protein-coding
MACS_peak_35665	chr17	79849399	79849972	+	357.75	NA	promoter-TSS (NR_158770)	promoter-TSS (NR_158770)	96	NM_001002244	51529	Hs.534456	NM_016476	ENSG00000141552	ANAPC11	APC11|Apc11p|HSPC214	anaphase promoting complex subunit 11	protein-coding
MACS_peak_35666	chr17	79849991	79850413	+	139.4	NA	promoter-TSS (NR_158770)	promoter-TSS (NR_158770)	399	NM_001002249	51529	Hs.534456	NM_016476	ENSG00000141552	ANAPC11	APC11|Apc11p|HSPC214	anaphase promoting complex subunit 11	protein-coding
MACS_peak_35664	chr17	79848821	79848988	+	58.17	NA	promoter-TSS (NM_001289416)	promoter-TSS (NM_001289416)	238	NM_001289414	51529	Hs.534456	NM_016476	ENSG00000141552	ANAPC11	APC11|Apc11p|HSPC214	anaphase promoting complex subunit 11	protein-coding
MACS_peak_53252	chr3	134204498	134205034	+	229.19	NA	promoter-TSS (NM_001353119)	promoter-TSS (NM_001353119)	61	NM_015391	25847	Hs.106909	NM_015391	ENSG00000129055	ANAPC13	APC13|SWM1	anaphase promoting complex subunit 13	protein-coding
MACS_peak_15216	chr11	71823422	71824158	+	306.49	NA	promoter-TSS (NM_001278494)	promoter-TSS (NM_001278494)	32	NM_001278488	25906	Hs.38044	NM_014042	ENSG00000110200	ANAPC15	APC15|C11orf51|HSPC020	anaphase promoting complex subunit 15	protein-coding
MACS_peak_15215	chr11	71823074	71823336	+	74.88	NA	promoter-TSS (NM_001278494)	promoter-TSS (NM_001278494)	73	NM_001278494	25906	Hs.38044	NM_014042	ENSG00000110200	ANAPC15	APC15|C11orf51|HSPC020	anaphase promoting complex subunit 15	protein-coding
MACS_peak_81762	chr9	140082264	140082542	+	90.23	NA	promoter-TSS (NM_003731)	promoter-TSS (NM_003731)	609	NM_013366	29882	Hs.533262	NM_013366	ENSG00000176248	ANAPC2	APC2	anaphase promoting complex subunit 2	protein-coding
MACS_peak_54654	chr4	25378836	25379020	+	65.87	NA	promoter-TSS (NM_013367)	promoter-TSS (NM_013367)	43	NM_001286756	29945	Hs.152173	NM_013367	ENSG00000053900	ANAPC4	APC4	anaphase promoting complex subunit 4	protein-coding
MACS_peak_20178	chr14	21152208	21152629	+	153.12	NA	promoter-TSS (NM_001282192)	promoter-TSS (NM_001282192)	82	NM_001145	283	Hs.283749	NM_001145	ENSG00000214274	ANG	ALS9|HEL168|RAA1|RNASE4|RNASE5	angiogenin	protein-coding
MACS_peak_20177	chr14	21151476	21151939	+	173.46	NA	promoter-TSS (NM_001145)	promoter-TSS (NM_001145)	-629	NM_001145	283	Hs.283749	NM_001145	ENSG00000214274	ANG	ALS9|HEL168|RAA1|RNASE4|RNASE5	angiogenin	protein-coding
MACS_peak_21026	chr14	77279098	77279426	+	160.43	NA	promoter-TSS (NM_015305)	promoter-TSS (NM_015305)	-37	NM_001370746	23357	Hs.497448	NM_015305	ENSG00000013523	ANGEL1	Ccr4e|KIAA0759	angel homolog 1	protein-coding
MACS_peak_8617	chr1	213188933	213189491	+	169.91	NA	promoter-TSS (NM_001300755)	promoter-TSS (NM_001300755)	-3	NM_144567	90806	Hs.157078	NM_144567	ENSG00000174606	ANGEL2	Ccr4d|KIAA0759L	angel homolog 2	protein-coding
MACS_peak_8616	chr1	213188647	213188880	+	85.49	NA	promoter-TSS (NM_001300755)	promoter-TSS (NM_001300755)	88	NM_001300755	90806	Hs.157078	NM_144567	ENSG00000174606	ANGEL2	Ccr4d|KIAA0759L	angel homolog 2	protein-coding
MACS_peak_72803	chr8	41655704	41656011	+	85.54	NA	promoter-TSS (NM_020475)	promoter-TSS (NM_020475)	-717	NM_020477	286	Hs.654438	NM_000037	ENSG00000029534	ANK1	ANK|SPH1|SPH2	ankyrin 1	protein-coding
MACS_peak_29934	chr17	4166973	4167400	+	111.35	NA	promoter-TSS (NM_001330063)	promoter-TSS (NM_001330063)	-44	NM_001257999	51479	Hs.696087	NM_016376	ENSG00000185722	ANKFY1	ANKHZN|BTBD23|ZFYVE14	ankyrin repeat and FYVE domain containing 1	protein-coding
MACS_peak_58684	chr5	14872346	14873147	+	215.15	NA	promoter-TSS (NM_054027)	promoter-TSS (NM_054027)	-859	NM_054027	56172	Hs.156727	NM_054027	ENSG00000154122	ANKH	ANK|CCAL2|CMDJ|CPPDD|HANK|MANK|SLC62A1	ANKH inorganic pyrophosphate transport regulator	protein-coding
MACS_peak_63283	chr5	139780262	139781780	+	695.66	NA	promoter-TSS (NM_017978)	promoter-TSS (NM_017978)	-378	NM_020690	404734	Hs.594084	NM_020690	ENSG00000254996	ANKHD1-EIF4EBP3	MASK-BP3|MASK-BP3ARF	ANKHD1-EIF4EBP3 readthrough	protein-coding
MACS_peak_45253	chr2	241500508	241500851	+	161.57	NA	promoter-TSS (NM_001354025)	promoter-TSS (NM_001354025)	-152	NR_148696	51281	Hs.656615	NM_016552	ENSG00000144504	ANKMY1	ZMYND13	ankyrin repeat and MYND domain containing 1	protein-coding
MACS_peak_68360	chr7	16684834	16685572	+	329.36	NA	promoter-TSS (NM_001159767)	promoter-TSS (NM_001159767)	176	NM_020319	57037	Hs.157378	NM_020319	ENSG00000106524	ANKMY2	ZMYND20	ankyrin repeat and MYND domain containing 2	protein-coding
MACS_peak_61789	chr5	72860973	72862025	+	366.55	NA	promoter-TSS (NM_001284430)	promoter-TSS (NM_001284430)	-35	NM_023039	57763	Hs.239154	NM_023039	ENSG00000164331	ANKRA2	ANKRA	ankyrin repeat family A member 2	protein-coding
MACS_peak_29400	chr16	89557142	89557511	+	210.93	NA	promoter-TSS (NM_001256183)	promoter-TSS (NM_001256183)	-357	NM_001256182	29123	Hs.335003	NM_013275	ENSG00000167522	ANKRD11	ANCO-1|ANCO1|LZ16|T13	ankyrin repeat domain 11	protein-coding
MACS_peak_29401	chr16	89557581	89557726	+	52.07	NA	promoter-TSS (NM_001256183)	promoter-TSS (NM_001256183)	-684	NM_001256182	29123	Hs.335003	NM_013275	ENSG00000167522	ANKRD11	ANCO-1|ANCO1|LZ16|T13	ankyrin repeat domain 11	protein-coding
MACS_peak_4906	chr1	70820038	70820654	+	316.91	NA	promoter-TSS (NR_027404)	promoter-TSS (NR_027404)	59	NM_030816	81573	Hs.744989	NM_030816	ENSG00000118454	ANKRD13C	dJ677H15.3	ankyrin repeat domain 13C	protein-coding
MACS_peak_4905	chr1	70819582	70819845	+	86.46	NA	promoter-TSS (NR_027404)	promoter-TSS (NR_027404)	692	NM_030816	81573	Hs.744989	NM_030816	ENSG00000118454	ANKRD13C	dJ677H15.3	ankyrin repeat domain 13C	protein-coding
MACS_peak_55047	chr4	74124683	74125092	+	137.1	NA	promoter-TSS (NM_015574)	promoter-TSS (NM_015574)	-372	NM_198889	26057	Hs.601206	NM_015574	ENSG00000132466	ANKRD17	GTAR|MASK2|NY-BR-16	ankyrin repeat domain 17	protein-coding
MACS_peak_75821	chr9	33523398	33524317	+	290.8	NA	promoter-TSS (NM_001353432)	promoter-TSS (NM_001353432)	-392	NM_001353432	441459	Hs.493710	NM_001013728	ENSG00000230453	ANKRD18B	bA255A11.3|bA255A11.5	ankyrin repeat domain 18B	protein-coding
MACS_peak_76189	chr9	43134072	43134275	+	72.9	NA	promoter-TSS (NM_001012419)	promoter-TSS (NM_001012419)	-629	NM_032250	84210	Hs.632671	NM_032250	ENSG00000260691	ANKRD20A1	ANKRD20A	ankyrin repeat domain 20 family member A1	protein-coding
MACS_peak_76188	chr9	43133857	43134024	+	51.67	NA	promoter-TSS (NM_001012419)	promoter-TSS (NM_001012419)	-396	NM_032250	84210	Hs.632671	NM_032250	ENSG00000260691	ANKRD20A1	ANKRD20A	ankyrin repeat domain 20 family member A1	protein-coding
MACS_peak_43439	chr2	133016275	133016559	+	137.07	NA	promoter-TSS (NR_152415)	promoter-TSS (NR_152415)	-811	NR_027020	554226	Hs.380689	NM_001358416	ENSG00000163046	ANKRD30BL	ANKRD30BP3|NCRNA00164	ankyrin repeat domain 30B like	protein-coding
MACS_peak_43438	chr2	133015096	133015567	+	203.83	NA	promoter-TSS (NR_031608)	promoter-TSS (NR_031608)	275	NR_152415	554226	Hs.380689	NM_001358416	ENSG00000163046	ANKRD30BL	ANKRD30BP3|NCRNA00164	ankyrin repeat domain 30B like	protein-coding
MACS_peak_6013	chr1	145470461	145470766	+	88.02	NA	promoter-TSS (NM_001330685)	promoter-TSS (NM_001330685)	98	NM_001039888	284615	Hs.620591	NM_001039888	ENSG00000272031	ANKRD34A	ANKRD34	ankyrin repeat domain 34A	protein-coding
MACS_peak_43023	chr2	98206293	98206426	+	53.68	NA	promoter-TSS (NM_025190)	promoter-TSS (NM_025190)	-19	NM_001353337	57730	Hs.532921	NM_020970	ENSG00000196912	ANKRD36B	KIAA1641	ankyrin repeat domain 36B	protein-coding
MACS_peak_15651	chr11	82904913	82905313	+	143.1	NA	promoter-TSS (NR_149009)	promoter-TSS (NR_149009)	359	NM_001300975	338699	Hs.503438	NM_182603	ENSG00000137494	ANKRD42	PPP1R79|SARP	ankyrin repeat domain 42	protein-coding
MACS_peak_17947	chr12	56652218	56652727	+	169.95	NA	promoter-TSS (NM_173595)	promoter-TSS (NM_173595)	-304	NM_173595	283373	Hs.524506	NM_173595	ENSG00000139645	ANKRD52	ANKRD33	ankyrin repeat domain 52	protein-coding
MACS_peak_49342	chr22	38245252	38245473	+	101.31	NA	promoter-TSS (NM_001242923)	promoter-TSS (NM_001242923)	-37	NM_001349853	129138	Hs.135259	NM_138797	ENSG00000100124	ANKRD54	LIAR	ankyrin repeat domain 54	protein-coding
MACS_peak_49341	chr22	38244606	38244757	+	63.72	NA	promoter-TSS (NM_001242923)	promoter-TSS (NM_001242923)	644	NM_001349853	129138	Hs.135259	NM_138797	ENSG00000100124	ANKRD54	LIAR	ankyrin repeat domain 54	protein-coding
MACS_peak_65853	chr6	34856731	34857035	+	140.84	NA	promoter-TSS (NM_015245)	promoter-TSS (NM_015245)	-149	NM_015245	23294	Hs.656492	NM_015245	ENSG00000064999	ANKS1A	ANKS1	ankyrin repeat and sterile alpha motif domain containing 1A	protein-coding
MACS_peak_18420	chr12	99548517	99548681	+	52.58	NA	promoter-TSS (NM_001204068)	promoter-TSS (NM_001204068)	-22	NM_001352196	56899	Hs.506458	NM_020140	ENSG00000185046	ANKS1B	AIDA|AIDA-1|ANKS2|EB-1|EB1|cajalin-2	ankyrin repeat and sterile alpha motif domain containing 1B	protein-coding
MACS_peak_44751	chr2	220094479	220095137	+	263.14	NA	promoter-TSS (NM_001077198)	promoter-TSS (NM_001077198)	280	NM_001042410	55139	Hs.437647	NM_018089	ENSG00000163516	ANKZF1	Vms1|ZNF744	ankyrin repeat and zinc finger peptidyl tRNA hydrolase 1	protein-coding
MACS_peak_68808	chr7	36429206	36429649	+	174.12	NA	promoter-TSS (NM_001284302)	promoter-TSS (NM_001284302)	-44	NM_001284301	54443	Hs.62180	NM_018685	ENSG00000011426	ANLN	FSGS8|Scraps|scra	anillin actin binding protein	protein-coding
MACS_peak_15101	chr11	69930571	69930780	+	51.2	NA	promoter-TSS (NR_030691)	promoter-TSS (NR_030691)	-841	NR_030691	55107	Hs.503074	NM_018043	ENSG00000131620	ANO1	DOG1|ORAOV2|TAOS2|TMEM16A	anoctamin 1	protein-coding
MACS_peak_51583	chr3	43663710	43663929	+	89.02	NA	promoter-TSS (NM_001204832)	promoter-TSS (NM_001204832)	-250	NM_001204834	55129	Hs.656657	NM_018075	ENSG00000160746	ANO10	SCAR10|TMEM16K	anoctamin 10	protein-coding
MACS_peak_12403	chr11	26353350	26353957	+	214.11	NA	promoter-TSS (NM_031418)	promoter-TSS (NM_031418)	-24	NM_031418	63982	Hs.91791	NM_031418	ENSG00000134343	ANO3	C11orf25|DYT23|DYT24|GENX-3947|TMEM16C	anoctamin 3	protein-coding
MACS_peak_16992	chr12	45609986	45610336	+	110.58	NA	promoter-TSS (NR_037144)	promoter-TSS (NR_037144)	283	NM_001025356	196527	Hs.505339	NM_001025356	ENSG00000177119	ANO6	BDPLT7|SCTS|TMEM16F	anoctamin 6	protein-coding
MACS_peak_16993	chr12	45610338	45610622	+	90.78	NA	promoter-TSS (NR_037144)	promoter-TSS (NR_037144)	602	NM_001025356	196527	Hs.505339	NM_001025356	ENSG00000177119	ANO6	BDPLT7|SCTS|TMEM16F	anoctamin 6	protein-coding
MACS_peak_38954	chr19	17444685	17444983	+	94.61	NA	promoter-TSS (NM_001195422)	promoter-TSS (NM_001195422)	830	NM_020959	57719	Hs.590990	NM_020959	ENSG00000074855	ANO8	KIAA1623|TMEM16H	anoctamin 8	protein-coding
MACS_peak_76811	chr9	100744953	100745139	+	65.21	NA	promoter-TSS (NM_006401)	promoter-TSS (NM_006401)	-577	NM_006401	10541	Hs.730654	NM_006401	ENSG00000136938	ANP32B	APRIL|PHAPI2|SSP29	acidic nuclear phosphoprotein 32 family member B	protein-coding
MACS_peak_6290	chr1	150208230	150208545	+	173.31	NA	promoter-TSS (NM_001280559)	promoter-TSS (NM_001280559)	73	NM_001280559	81611	Hs.656466	NM_030920	ENSG00000143401	ANP32E	LANP-L|LANPL	acidic nuclear phosphoprotein 32 family member E	protein-coding
MACS_peak_6291	chr1	150208713	150209001	+	88.28	NA	promoter-TSS (NM_001280559)	promoter-TSS (NM_001280559)	-397	NM_001136478	81611	Hs.656466	NM_030920	ENSG00000143401	ANP32E	LANP-L|LANPL	acidic nuclear phosphoprotein 32 family member E	protein-coding
MACS_peak_6289	chr1	150206864	150207212	+	206.95	NA	promoter-TSS (NM_001136479)	promoter-TSS (NM_001136479)	-12	NM_001136479	81611	Hs.656466	NM_030920	ENSG00000143401	ANP32E	LANP-L|LANPL	acidic nuclear phosphoprotein 32 family member E	protein-coding
MACS_peak_24936	chr15	90358242	90358443	+	54	NA	promoter-TSS (NM_001150)	promoter-TSS (NM_001150)	-258	NM_001150	290	Hs.1239	NM_001150	ENSG00000166825	ANPEP	APN|CD13|GP150|LAP1|P150|PEPN	alanyl aminopeptidase, membrane	protein-coding
MACS_peak_42404	chr2	69240097	69240296	+	86.84	NA	promoter-TSS (NM_018153)	promoter-TSS (NM_018153)	-80	NM_053034	84168	Hs.165859	NM_018153	ENSG00000169604	ANTXR1	ATR|GAPO|TEM8	ANTXR cell adhesion molecule 1	protein-coding
MACS_peak_10878	chr10	81965295	81965518	+	72.97	NA	promoter-TSS (NM_001278409)	promoter-TSS (NM_001278409)	-113	NM_001157	311	Hs.530291	NM_001157	ENSG00000122359	ANXA11	ALS23|ANX11|CAP-50|CAP50	annexin A11	protein-coding
MACS_peak_10877	chr10	81964073	81964250	+	55.02	NA	promoter-TSS (NM_001278408)	promoter-TSS (NM_001278408)	86	NM_001278408	311	Hs.530291	NM_001157	ENSG00000122359	ANXA11	ALS23|ANX11|CAP-50|CAP50	annexin A11	protein-coding
MACS_peak_22998	chr15	60690274	60691189	+	283.67	NA	promoter-TSS (NM_001136015)	promoter-TSS (NM_001136015)	-546	NM_001136015	302	Hs.511605	NM_004039	ENSG00000182718	ANXA2	ANX2|ANX2L4|CAL1H|HEL-S-270|LIP2|LPC2|LPC2D|P36|PAP-IV	annexin A2	protein-coding
MACS_peak_61001	chr5	43039742	43041273	+	386.83	NA	promoter-TSS (NM_001014279)	promoter-TSS (NM_001014279)	-60	NM_001014279	389289	Hs.529385	NM_001014279	ENSG00000177721	ANXA2R	AX2R|AXIIR|C5orf39	annexin A2 receptor	protein-coding
MACS_peak_55106	chr4	79472857	79473016	+	53.83	NA	promoter-TSS (NM_005139)	promoter-TSS (NM_005139)	12	NM_005139	306	Hs.480042	NM_005139	ENSG00000138772	ANXA3	ANX3	annexin A3	protein-coding
MACS_peak_42418	chr2	69871341	69871692	+	123.5	NA	promoter-TSS (NM_014911)	promoter-TSS (NM_014911)	576	NM_001320698	307	Hs.422986	NM_001153	ENSG00000196975	ANXA4	ANX4|HEL-S-274|P32.5|PAP-II|PIG28|PP4-X|ZAP36	annexin A4	protein-coding
MACS_peak_42417	chr2	69871096	69871256	+	53.83	NA	promoter-TSS (NM_014911)	promoter-TSS (NM_014911)	236	NM_001320698	307	Hs.422986	NM_001153	ENSG00000196975	ANXA4	ANX4|HEL-S-274|P32.5|PAP-II|PIG28|PP4-X|ZAP36	annexin A4	protein-coding
MACS_peak_42424	chr2	69968375	69968512	+	61.87	NA	promoter-TSS (NM_001365496)	promoter-TSS (NM_001365496)	-823	NM_001320702	307	Hs.422986	NM_001153	ENSG00000196975	ANXA4	ANX4|HEL-S-274|P32.5|PAP-II|PIG28|PP4-X|ZAP36	annexin A4	protein-coding
MACS_peak_42416	chr2	69870820	69871066	+	85.23	NA	promoter-TSS (NM_001320698)	promoter-TSS (NM_001320698)	3	NM_001320698	307	Hs.422986	NM_001153	ENSG00000196975	ANXA4	ANX4|HEL-S-274|P32.5|PAP-II|PIG28|PP4-X|ZAP36	annexin A4	protein-coding
MACS_peak_63728	chr5	150537222	150537721	+	189.36	NA	promoter-TSS (NM_001363114)	promoter-TSS (NM_001363114)	-131	NM_001363114	309	Hs.412117	NM_001155	ENSG00000197043	ANXA6	ANX6|CBP68|CPB-II|p68|p70	annexin A6	protein-coding
MACS_peak_10703	chr10	75174007	75174192	+	52.24	NA	promoter-TSS (NM_001320879)	promoter-TSS (NM_001320879)	-283	NM_001320880	310	Hs.631827	NM_001156	ENSG00000138279	ANXA7	ANX7|SNX|SYNEXIN	annexin A7	protein-coding
MACS_peak_6379	chr1	150954294	150954923	+	163.26	NA	promoter-TSS (NM_003568)	promoter-TSS (NM_003568)	-160	NM_003568	8416	Hs.3346	NM_003568	ENSG00000143412	ANXA9	ANX31	annexin A9	protein-coding
MACS_peak_32545	chr17	41004377	41004711	+	83.71	NA	promoter-TSS (NM_001277732)	promoter-TSS (NM_001277732)	-716	NM_001277732	8639	Hs.198241	NM_003734	ENSG00000131471	AOC3	HPAO|SSAO|VAP-1|VAP1	amine oxidase copper containing 3	protein-coding
MACS_peak_76706	chr9	97488743	97489394	+	379.94	NA	promoter-TSS (NM_001193331)	promoter-TSS (NM_001193331)	87	NM_001193331	84909	Hs.434253	NM_032823	ENSG00000148120	AOPEP	AP-O|APO|C90RF3|C9orf3|ONPEP	aminopeptidase O (putative)	protein-coding
MACS_peak_44195	chr2	201559899	201560261	+	87.01	NA	promoter-TSS (NR_135011)	promoter-TSS (NR_135011)	-366	NR_135012	107161151	Hs.148269	NR_135011		AOX3P-AOX2P	AOX3/AOX3L1	AOX3P-AOX2P readthrough, transcribed pseudogene	pseudo
MACS_peak_55375	chr4	113152485	113152895	+	155.25	NA	promoter-TSS (NM_018569)	promoter-TSS (NM_018569)	-253	NM_001128426	55435	Hs.435991	NM_018569	ENSG00000138660	AP1AR	2C18|C4orf16|GBAR|PRO0971|gamma-BAR	adaptor related protein complex 1 associated regulatory protein	protein-coding
MACS_peak_38841	chr19	16308465	16308831	+	224.3	NA	promoter-TSS (NM_032493)	promoter-TSS (NM_032493)	-74	NM_001130524	8907	Hs.71040	NM_032493	ENSG00000072958	AP1M1	AP47|CLAPM2|CLTNM|MU-1A	adaptor related protein complex 1 subunit mu 1	protein-coding
MACS_peak_82206	chrX	15873260	15873426	+	51.97	NA	promoter-TSS (NM_003916)	promoter-TSS (NM_003916)	-407	NM_001369008	8905	Hs.121592	NM_003916	ENSG00000182287	AP1S2	DC22|MRX59|MRXS21|MRXS5|MRXSF|PGS|SIGMA1B	adaptor related protein complex 1 subunit sigma 2	protein-coding
MACS_peak_82207	chrX	15873653	15873820	+	51.67	NA	promoter-TSS (NM_003916)	promoter-TSS (NM_003916)	-800	NM_001369008	8905	Hs.121592	NM_003916	ENSG00000182287	AP1S2	DC22|MRX59|MRXS21|MRXS5|MRXSF|PGS|SIGMA1B	adaptor related protein complex 1 subunit sigma 2	protein-coding
MACS_peak_40870	chr19	50269586	50269898	+	88.11	NA	promoter-TSS (NM_014203)	promoter-TSS (NM_014203)	-516	NM_130787	160	Hs.467125	NM_014203	ENSG00000196961	AP2A1	ADTAA|AP2-ALPHA|CLAPA1	adaptor related protein complex 2 subunit alpha 1	protein-coding
MACS_peak_40871	chr19	50269947	50270071	+	52.5	NA	promoter-TSS (NM_014203)	promoter-TSS (NM_014203)	-249	NM_130787	160	Hs.467125	NM_014203	ENSG00000196961	AP2A1	ADTAA|AP2-ALPHA|CLAPA1	adaptor related protein complex 2 subunit alpha 1	protein-coding
MACS_peak_53836	chr3	183892429	183892915	+	191.66	NA	promoter-TSS (NM_001311198)	promoter-TSS (NM_001311198)	29	NM_004068	1173	Hs.518460	NM_004068	ENSG00000161203	AP2M1	AP50|CLAPM1|mu2	adaptor related protein complex 2 subunit mu 1	protein-coding
MACS_peak_40412	chr19	47354670	47354830	+	53.83	NA	promoter-TSS (NM_004069)	promoter-TSS (NM_004069)	-647	NM_001301081	1175	Hs.119591	NM_004069	ENSG00000042753	AP2S1	AP17|CLAPS2|FBH3|FBHOk|HHC3	adaptor related protein complex 2 subunit sigma 1	protein-coding
MACS_peak_40411	chr19	47353817	47354182	+	118.67	NA	promoter-TSS (NM_001301076)	promoter-TSS (NM_001301076)	104	NM_021575	1175	Hs.119591	NM_004069	ENSG00000042753	AP2S1	AP17|CLAPS2|FBH3|FBHOk|HHC3	adaptor related protein complex 2 subunit sigma 1	protein-coding
MACS_peak_61889	chr5	77590383	77590851	+	214.56	NA	promoter-TSS (NM_001271769)	promoter-TSS (NM_001271769)	-38	NM_003664	8546	Hs.532091	NM_003664	ENSG00000132842	AP3B1	ADTB3|ADTB3A|HPS|HPS2|PE	adaptor related protein complex 3 subunit beta 1	protein-coding
MACS_peak_24653	chr15	83332296	83332551	+	72.47	NA	promoter-TSS (NM_001348441)	promoter-TSS (NM_001348441)	-996	NM_001348441	8120	Hs.199593	NM_004644	ENSG00000103723	AP3B2	EIEE48|NAPTB	adaptor related protein complex 3 subunit beta 2	protein-coding
MACS_peak_24943	chr15	90436703	90437616	+	553.8	NA	promoter-TSS (NM_005829)	promoter-TSS (NM_005829)	67	NM_005829	10239	Hs.632161	NM_005829	ENSG00000157823	AP3S2	AP3S3|sigma3b	adaptor related protein complex 3 subunit sigma 2	protein-coding
MACS_peak_24944	chr15	90437817	90438107	+	88.86	NA	promoter-TSS (NM_005829)	promoter-TSS (NM_005829)	-736	NR_023361	10239	Hs.632161	NM_005829	ENSG00000157823	AP3S2	AP3S3|sigma3b	adaptor related protein complex 3 subunit sigma 2	protein-coding
MACS_peak_5654	chr1	114447118	114448209	+	648.42	NA	promoter-TSS (NM_001363690)	promoter-TSS (NM_001363690)	-13	NM_001253853	10717	Hs.515048	NM_006594	ENSG00000134262	AP4B1	BETA-4|CPSQ5|SPG47	adaptor related protein complex 4 subunit beta 1	protein-coding
MACS_peak_22758	chr15	51200577	51201284	+	315.92	NA	promoter-TSS (NM_001252127)	promoter-TSS (NM_001252127)	50	NM_007347	23431	Hs.413366	NM_007347	ENSG00000081014	AP4E1	CPSQ4|SPG51|STUT1	adaptor related protein complex 4 subunit epsilon 1	protein-coding
MACS_peak_70658	chr7	99698595	99699324	+	406.46	NA	promoter-TSS (NM_182776)	promoter-TSS (NM_182776)	-307	NM_004722	9179	Hs.632317	NM_004722	ENSG00000221838	AP4M1	CPSQ3|MU-4|MU-ARP2|SPG50	adaptor related protein complex 4 subunit mu 1	protein-coding
MACS_peak_20309	chr14	31495766	31496265	+	203.78	NA	promoter-TSS (NM_014574)	promoter-TSS (NM_014574)	166	NM_001254728	11154	Hs.293411	NM_007077	ENSG00000100478	AP4S1	AP47B|CLA20|CLAPS4|CPSQ6|SPG52	adaptor related protein complex 4 subunit sigma 1	protein-coding
MACS_peak_20649	chr14	57735514	57736021	+	219.07	NA	promoter-TSS (NR_026895)	promoter-TSS (NR_026895)	78	NM_018229	55745	Hs.597349	NM_018229	ENSG00000053770	AP5M1	C14orf108|MUDENG|Mu5|MuD	adaptor related protein complex 5 subunit mu 1	protein-coding
MACS_peak_45341	chr20	3800822	3800976	+	55.78	NA	promoter-TSS (NM_018347)	promoter-TSS (NM_018347)	-272	NM_001204446	55317	Hs.104806	NM_018347	ENSG00000125843	AP5S1	C20orf29	adaptor related protein complex 5 subunit sigma 1	protein-coding
MACS_peak_67876	chr7	4814268	4815401	+	466.34	NA	promoter-TSS (NM_001364858)	promoter-TSS (NM_001364858)	-420	NM_001364858	9907	Hs.558440	NM_014855	ENSG00000242802	AP5Z1	KIAA0415|SPG48|zeta	adaptor related protein complex 5 subunit zeta 1	protein-coding
MACS_peak_18417	chr12	99039200	99039373	+	62.85	NA	promoter-TSS (NM_153687)	promoter-TSS (NM_153687)	208	NM_181868	317	Hs.552567	NM_001160	ENSG00000120868	APAF1	APAF-1|CED4	apoptotic peptidase activating factor 1	protein-coding
MACS_peak_37353	chr19	3761891	3762025	+	55.88	NA	promoter-TSS (NM_004886)	promoter-TSS (NM_004886)	-268	NM_004886	9546	Hs.25527	NM_004886	ENSG00000011132	APBA3	MGC:15815|X11L2|mint3	amyloid beta precursor protein binding family A member 3	protein-coding
MACS_peak_54799	chr4	40859487	40859683	+	62.02	NA	promoter-TSS (NM_001166053)	promoter-TSS (NM_001166053)	-376	NM_001166054	323	Hs.479602	NM_004307	ENSG00000163697	APBB2	FE65L|FE65L1	amyloid beta precursor protein binding family B member 2	protein-coding
MACS_peak_63298	chr5	139943992	139944746	+	414.61	NA	promoter-TSS (NM_133173)	promoter-TSS (NM_133173)	-180	NM_006051	10307	Hs.529449	NM_006051	ENSG00000113108	APBB3	FE65L2|SRA	amyloid beta precursor protein binding family B member 3	protein-coding
MACS_peak_62363	chr5	112073302	112073807	+	237.99	NA	promoter-TSS (NM_001354906)	promoter-TSS (NM_001354906)	-28	NM_001354901	324	Hs.158932	NM_000038	ENSG00000134982	APC	BTPS2|DP2|DP2.5|DP3|GS|PPP1R46	APC regulator of WNT signaling pathway	protein-coding
MACS_peak_47230	chr20	57090198	57090406	+	57.4	NA	promoter-TSS (NR_130908)	promoter-TSS (NR_130908)	-133	NR_034147	149773	Hs.685214	NR_034147	ENSG00000231290	APCDD1L-DT	APCDD1L-AS1	APCDD1L divergent transcript	ncRNA
MACS_peak_52012	chr3	49710898	49711189	+	102.02	NA	promoter-TSS (NM_001640)	promoter-TSS (NM_001640)	-741	NM_001640	327	Hs.517969	NM_001640	ENSG00000164062	APEH	AARE|ACPH|APH|D3F15S2|D3S48E|DNF15S2|OPH	acylaminoacyl-peptide hydrolase	protein-coding
MACS_peak_52013	chr3	49711610	49711901	+	98.64	NA	promoter-TSS (NM_001640)	promoter-TSS (NM_001640)	-29	NM_001640	327	Hs.517969	NM_001640	ENSG00000164062	APEH	AARE|ACPH|APH|D3F15S2|D3S48E|DNF15S2|OPH	acylaminoacyl-peptide hydrolase	protein-coding
MACS_peak_20170	chr14	20923713	20923951	+	74.24	NA	promoter-TSS (NM_017807)	promoter-TSS (NM_017807)	447	NM_080649	328	Hs.73722	NM_001641	ENSG00000100823	APEX1	APE|APE1|APEN|APEX|APX|HAP1|REF1	apurinic/apyrimidinic endodeoxyribonuclease 1	protein-coding
MACS_peak_20169	chr14	20923177	20923608	+	244.32	NA	promoter-TSS (NM_001244249)	promoter-TSS (NM_001244249)	7	NM_080649	328	Hs.73722	NM_001641	ENSG00000100823	APEX1	APE|APE1|APEN|APEX|APX|HAP1|REF1	apurinic/apyrimidinic endodeoxyribonuclease 1	protein-coding
MACS_peak_82601	chrX	55026318	55026503	+	58.98	NA	promoter-TSS (NM_001271748)	promoter-TSS (NM_001271748)	-386	NM_001271748	27301	Hs.659558	NM_014481	ENSG00000169188	APEX2	APE2|APEXL2|XTH2|ZGRF2	apurinic/apyrimidinic endodeoxyribonuclease 2	protein-coding
MACS_peak_12679	chr11	43333394	43333799	+	209.91	NA	promoter-TSS (NM_006595)	promoter-TSS (NM_006595)	50	NM_001142931	8539	Hs.435771	NM_006595	ENSG00000166181	API5	AAC-11|AAC11	apoptosis inhibitor 5	protein-coding
MACS_peak_42398	chr2	68694813	68695135	+	133.76	NA	promoter-TSS (NR_133923)	promoter-TSS (NR_133923)	257	NM_173545	200558	Hs.720369	NM_173545	ENSG00000169621	APLF	APFL|C2orf13|PALF|Xip1|ZCCHH1	aprataxin and PNKP like factor	protein-coding
MACS_peak_42397	chr2	68694532	68694770	+	101.87	NA	promoter-TSS (NM_173545)	promoter-TSS (NM_173545)	-66	NM_173545	200558	Hs.720369	NM_173545	ENSG00000169621	APLF	APFL|C2orf13|PALF|Xip1|ZCCHH1	aprataxin and PNKP like factor	protein-coding
MACS_peak_45394	chr20	24973272	24973468	+	104.33	NA	promoter-TSS (NM_020531)	promoter-TSS (NM_020531)	17	NM_020531	57136	Hs.472330	NM_020531	ENSG00000101474	APMAP	BSCv|C20orf3	adipocyte plasma membrane associated protein	protein-coding
MACS_peak_49253	chr22	36113546	36113729	+	59.61	NA	promoter-TSS (NM_030642)	promoter-TSS (NM_030642)	-282	NM_030642	80831	Hs.326561	NM_030642	ENSG00000128313	APOL5	APOL-V|APOLV	apolipoprotein L5	protein-coding
MACS_peak_16566	chr12	12878226	12878476	+	140.79	NA	promoter-TSS (NM_001130415)	promoter-TSS (NM_001130415)	-500	NM_001130415	81575	Hs.23388	NM_030817	ENSG00000178878	APOLD1	VERGE	apolipoprotein L domain containing 1	protein-coding
MACS_peak_82288	chrX	23925646	23926081	+	175.7	NA	promoter-TSS (NM_152761)	promoter-TSS (NM_152761)	192	NR_026545	79135	Hs.495851	NM_024122	ENSG00000184831	APOO	FAM121B|MIC26|MICOS26|Mic23|My025	apolipoprotein O	protein-coding
MACS_peak_48279	chr21	27543452	27543737	+	62.67	NA	promoter-TSS (NM_001204301)	promoter-TSS (NM_001204301)	-148	NM_001136131	351	Hs.434980	NM_000484	ENSG00000142192	APP	AAA|ABETA|ABPP|AD1|APPI|CTFgamma|CVAP|PN-II|PN2|preA4	amyloid beta precursor protein	protein-coding
MACS_peak_33820	chr17	58603252	58603757	+	143.44	NA	promoter-TSS (NM_006380)	promoter-TSS (NM_006380)	97	NM_001282476	10513	Hs.84084	NM_006380	ENSG00000062725	APPBP2	APP-BP2|HS.84084|PAT1	amyloid beta precursor protein binding protein 2	protein-coding
MACS_peak_52506	chr3	57261498	57261759	+	113.2	NA	promoter-TSS (NM_012096)	promoter-TSS (NM_012096)	-129	NM_012096	26060	Hs.476415	NM_012096	ENSG00000157500	APPL1	APPL|DIP13alpha|MODY14	adaptor protein, phosphotyrosine interacting with PH domain and leucine zipper 1	protein-coding
MACS_peak_29357	chr16	88878320	88878554	+	103.41	NA	promoter-TSS (NM_001030018)	promoter-TSS (NM_001030018)	-101	NM_001030018	353	Hs.28914	NM_000485	ENSG00000198931	APRT	AMP|APRTD	adenine phosphoribosyltransferase	protein-coding
MACS_peak_29358	chr16	88878605	88878772	+	58.17	NA	promoter-TSS (NM_001030018)	promoter-TSS (NM_001030018)	-352	NM_001030018	353	Hs.28914	NM_000485	ENSG00000198931	APRT	AMP|APRTD	adenine phosphoribosyltransferase	protein-coding
MACS_peak_70307	chr7	77325307	77326046	+	279.06	NA	promoter-TSS (NR_134251)	promoter-TSS (NR_134251)	-94	NR_134253	100505854	Hs.72451	NR_038361	ENSG00000214293	APTR	RSBN1L-AS1	Alu-mediated CDKN1A/p21 transcriptional regulator	ncRNA
MACS_peak_70308	chr7	77326669	77326968	+	63.45	NA	promoter-TSS (NR_038361)	promoter-TSS (NR_038361)	-156	NR_038361	100505854	Hs.72451	NR_038361	ENSG00000214293	APTR	RSBN1L-AS1	Alu-mediated CDKN1A/p21 transcriptional regulator	ncRNA
MACS_peak_75743	chr9	33024554	33024760	+	55.76	NA	promoter-TSS (NM_001539)	promoter-TSS (NM_001539)	461	NR_160927	54840	Hs.20158	NM_017692	ENSG00000137074	APTX	AOA|AOA1|AXA1|EAOH|EOAHA|FHA-HIT	aprataxin	protein-coding
MACS_peak_15579	chr11	77300323	77300559	+	86.81	NA	promoter-TSS (NM_173039)	promoter-TSS (NM_173039)	-239	NM_001363477	282679	Hs.503345	NM_173039	ENSG00000178301	AQP11	AQPX1	aquaporin 11	protein-coding
MACS_peak_15578	chr11	77299684	77299877	+	50.89	NA	promoter-TSS (NM_001363477)	promoter-TSS (NM_001363477)	-900	NM_001363477	282679	Hs.503345	NM_173039	ENSG00000178301	AQP11	AQPX1	aquaporin 11	protein-coding
MACS_peak_75813	chr9	33448167	33448460	+	89.07	NA	promoter-TSS (NM_001318144)	promoter-TSS (NM_001318144)	-722	NM_001318144	360	Hs.234642	NM_004925	ENSG00000165272	AQP3	AQP-3|GIL	aquaporin 3 (Gill blood group)	protein-coding
MACS_peak_17335	chr12	50366636	50366945	+	66.58	NA	promoter-TSS (NM_001652)	promoter-TSS (NM_001652)	60	NM_001652	363	Hs.54505	NM_001652	ENSG00000086159	AQP6	AQP2L|KID	aquaporin 6	protein-coding
MACS_peak_17334	chr12	50366415	50366587	+	51.61	NA	promoter-TSS (NM_001652)	promoter-TSS (NM_001652)	-229	NM_001652	363	Hs.54505	NM_001652	ENSG00000086159	AQP6	AQP2L|KID	aquaporin 6	protein-coding
MACS_peak_76304	chr9	67289138	67289407	+	97.19	NA	promoter-TSS (NR_026558).2	promoter-TSS (NR_026558).2	-21	NR_026558	441432	Hs.743215	NR_026558		AQP7P3	AQPap-3	aquaporin 7 pseudogene 3	pseudo
MACS_peak_27681	chr16	25227818	25228093	+	84.5	NA	promoter-TSS (NM_001169)	promoter-TSS (NM_001169)	-313	NM_001169	343	Hs.176658	NM_001169	ENSG00000103375	AQP8	AQP-8	aquaporin 8	protein-coding
MACS_peak_22066	chr15	35261608	35262469	+	450.07	NA	promoter-TSS (NM_014691)	promoter-TSS (NM_014691)	-95	NM_014691	9716	Hs.510958	NM_014691	ENSG00000021776	AQR	IBP160|fSAP164	aquarius intron-binding spliceosomal factor	protein-coding
MACS_peak_82469	chrX	47420423	47420905	+	159.11	NA	promoter-TSS (NM_001654)	promoter-TSS (NM_001654)	60	NM_001654	369	Hs.446641	NM_001654	ENSG00000078061	ARAF	A-RAF|ARAF1|PKS2|RAFA1	A-Raf proto-oncogene, serine/threonine kinase	protein-coding
MACS_peak_54698	chr4	36246721	36246896	+	59.82	NA	promoter-TSS (NM_015230)	promoter-TSS (NM_015230)	-672	NM_015230	116984	Hs.479451	NM_015230	ENSG00000047365	ARAP2	CENTD1|PARX	ArfGAP with RhoGAP domain, ankyrin repeat and PH domain 2	protein-coding
MACS_peak_54697	chr4	36246211	36246371	+	53.83	NA	promoter-TSS (NM_015230)	promoter-TSS (NM_015230)	-155	NM_015230	116984	Hs.479451	NM_015230	ENSG00000047365	ARAP2	CENTD1|PARX	ArfGAP with RhoGAP domain, ankyrin repeat and PH domain 2	protein-coding
MACS_peak_74490	chr8	143696362	143696520	+	61.2	NA	promoter-TSS (NM_015193)	promoter-TSS (NM_015193)	-601	NM_015193	23237	Hs.40888	NM_015193	ENSG00000198576	ARC	Arg3.1|hArc	activity regulated cytoskeleton associated protein	protein-coding
MACS_peak_9047	chr1	228269867	228270548	+	231.95	NA	promoter-TSS (NM_001024228)	promoter-TSS (NM_001024228)	-154	NM_001024226	375	Hs.286221	NM_001658	ENSG00000143761	ARF1	PVNH8	ADP ribosylation factor 1	protein-coding
MACS_peak_9048	chr1	228270753	228271066	+	78.27	NA	promoter-TSS (NM_001024228)	promoter-TSS (NM_001024228)	58	NM_001024227	375	Hs.286221	NM_001658	ENSG00000143761	ARF1	PVNH8	ADP ribosylation factor 1	protein-coding
MACS_peak_52516	chr3	57582170	57583796	+	697.71	NA	promoter-TSS (NR_132369)	promoter-TSS (NR_132369)	88	NM_001660	378	Hs.652183	NM_001660	ENSG00000168374	ARF4	ARF2	ADP ribosylation factor 4	protein-coding
MACS_peak_47770	chr20	61914906	61915070	+	52.58	NA	promoter-TSS (NR_104022)	promoter-TSS (NR_104022)	-676	NR_104023	55738	Hs.25584	NM_018209	ENSG00000101199	ARFGAP1	ARF1GAP|HRIHFB2281	ADP ribosylation factor GTPase activating protein 1	protein-coding
MACS_peak_47767	chr20	61904008	61904271	+	92.36	NA	promoter-TSS (NM_175609)	promoter-TSS (NM_175609)	2	NM_001281484	55738	Hs.25584	NM_018209	ENSG00000101199	ARFGAP1	ARF1GAP|HRIHFB2281	ADP ribosylation factor GTPase activating protein 1	protein-coding
MACS_peak_12896	chr11	47197669	47200163	+	1101.93	NA	promoter-TSS (NM_001242832)	promoter-TSS (NM_001242832)	-240	NM_001242832	84364	Hs.436204	NM_032389	ENSG00000149182	ARFGAP2	IRZ|NBLA10535|ZFP289|ZNF289	ADP ribosylation factor GTPase activating protein 2	protein-coding
MACS_peak_47921	chr20	62339045	62339522	+	221.33	NA	promoter-TSS (NM_001267546)	promoter-TSS (NM_001267546)	45	NM_001267544	10139	Hs.389277	NM_003224	ENSG00000101246	ARFRP1	ARL18|ARP|Arp1	ADP ribosylation factor related protein 1	protein-coding
MACS_peak_12846	chr11	46721898	46722719	+	381.34	NA	promoter-TSS (NM_001184751)	promoter-TSS (NM_001184751)	-139	NM_004308	392	Hs.138860	NM_004308	ENSG00000175220	ARHGAP1	CDC42GAP|RHOGAP|RHOGAP1|p50rhoGAP	Rho GTPase activating protein 1	protein-coding
MACS_peak_12845	chr11	46721543	46721717	+	59.21	NA	promoter-TSS (NM_001184751)	promoter-TSS (NM_001184751)	539	NM_004308	392	Hs.138860	NM_004308	ENSG00000175220	ARHGAP1	CDC42GAP|RHOGAP|RHOGAP1|p50rhoGAP	Rho GTPase activating protein 1	protein-coding
MACS_peak_21995	chr15	32907677	32907986	+	103.78	NA	promoter-TSS (NR_135833)	promoter-TSS (NR_135833)	126	NM_014783	9824	Hs.591130	NM_014783	ENSG00000198826	ARHGAP11A	GAP (1-12)	Rho GTPase activating protein 11A	protein-coding
MACS_peak_21994	chr15	32907439	32907651	+	90.27	NA	promoter-TSS (NM_001368319)	promoter-TSS (NM_001368319)	-132	NM_199357	9824	Hs.591130	NM_014783	ENSG00000198826	ARHGAP11A	GAP (1-12)	Rho GTPase activating protein 11A	protein-coding
MACS_peak_21906	chr15	30917901	30918517	+	324.78	NA	promoter-TSS (NR_157593)	promoter-TSS (NR_157593)	-142	NM_001039841	89839	Hs.659621	NM_001039841	ENSG00000284906	ARHGAP11B	B'-T|FAM7B1|GAP (1-8)	Rho GTPase activating protein 11B	protein-coding
MACS_peak_10069	chr10	25011836	25012028	+	69.9	NA	promoter-TSS (NR_160023)	promoter-TSS (NR_160023)	218	NR_160021	57584	Hs.524195	NM_020824	ENSG00000107863	ARHGAP21	ARHGAP10	Rho GTPase activating protein 21	protein-coding
MACS_peak_10070	chr10	25013222	25013539	+	128.59	NA	promoter-TSS (NM_001367447)	promoter-TSS (NM_001367447)	-564	NM_020824	57584	Hs.524195	NM_020824	ENSG00000107863	ARHGAP21	ARHGAP10	Rho GTPase activating protein 21	protein-coding
MACS_peak_63400	chr5	142149740	142150102	+	131.1	NA	promoter-TSS (NM_015071)	promoter-TSS (NM_015071)	-21	NM_001135608	23092	Hs.654668	NM_015071	ENSG00000145819	ARHGAP26	GRAF|GRAF1|OPHN1L|OPHN1L1	Rho GTPase activating protein 26	protein-coding
MACS_peak_32969	chr17	43502943	43503278	+	117.16	NA	promoter-TSS (NM_199282)	promoter-TSS (NM_199282)	-111	NM_199282	201176	Hs.205326	NM_174919	ENSG00000159314	ARHGAP27	CAMGAP1|PP905|SH3D20|SH3P20	Rho GTPase activating protein 27	protein-coding
MACS_peak_32970	chr17	43503430	43503648	+	56.16	NA	promoter-TSS (NM_199282)	promoter-TSS (NM_199282)	-540	NM_199282	201176	Hs.205326	NM_174919	ENSG00000159314	ARHGAP27	CAMGAP1|PP905|SH3D20|SH3P20	Rho GTPase activating protein 27	protein-coding
MACS_peak_5259	chr1	94702880	94703218	+	94.51	NA	promoter-TSS (NM_001328667)	promoter-TSS (NM_001328667)	91	NM_001328667	9411	Hs.483238	NM_004815	ENSG00000137962	ARHGAP29	PARG1	Rho GTPase activating protein 29	protein-coding
MACS_peak_5260	chr1	94713203	94713428	+	65.55	NA	promoter-TSS (NM_001328665)	promoter-TSS (NM_001328665)	-13	NM_001328664	9411	Hs.483238	NM_004815	ENSG00000137962	ARHGAP29	PARG1	Rho GTPase activating protein 29	protein-coding
MACS_peak_52887	chr3	119013132	119013435	+	80.54	NA	promoter-TSS (NM_020754)	promoter-TSS (NM_020754)	53	NM_020754	57514	Hs.668218	NM_020754	ENSG00000031081	ARHGAP31	AOS1|CDGAP	Rho GTPase activating protein 31	protein-coding
MACS_peak_39447	chr19	36265734	36265926	+	69.9	NA	promoter-TSS (NM_001366178)	promoter-TSS (NM_001366178)	-636	NM_001172630	115703	Hs.515364	NM_052948	ENSG00000004777	ARHGAP33	NOMA-GAP|SNX26|TCGAP	Rho GTPase activating protein 33	protein-coding
MACS_peak_40418	chr19	47363488	47363967	+	201.38	NA	promoter-TSS (NM_004491)	promoter-TSS (NM_004491)	-527	NM_004491	2909	Hs.509447	NM_004491	ENSG00000160007	ARHGAP35	GRF-1|GRLF1|P190-A|P190A|p190ARhoGAP|p190RhoGAP	Rho GTPase activating protein 35	protein-coding
MACS_peak_75281	chr8	145911194	145911742	+	235.44	NA	promoter-TSS (NM_001308208)	promoter-TSS (NM_001308208)	-237	NM_001308208	80728	Hs.148988	NM_025251	ENSG00000147799	ARHGAP39	CrGAP|Vilse	Rho GTPase activating protein 39	protein-coding
MACS_peak_75282	chr8	145911914	145912063	+	64.59	NA	promoter-TSS (NM_001308208)	promoter-TSS (NM_001308208)	-757	NM_001308208	80728	Hs.148988	NM_025251	ENSG00000147799	ARHGAP39	CrGAP|Vilse	Rho GTPase activating protein 39	protein-coding
MACS_peak_36850	chr19	1065544	1066002	+	159.02	NA	promoter-TSS (NM_001258328)	promoter-TSS (NM_001258328)	-185	NM_001258328	23526	Hs.465521	NM_012292	ENSG00000180448	ARHGAP45	HA-1|HLA-HA1|HMHA1	Rho GTPase activating protein 45	protein-coding
MACS_peak_36849	chr19	1064986	1065147	+	60.17	NA	promoter-TSS (NM_001258328)	promoter-TSS (NM_001258328)	-892	NM_001258328	23526	Hs.465521	NM_012292	ENSG00000180448	ARHGAP45	HA-1|HLA-HA1|HMHA1	Rho GTPase activating protein 45	protein-coding
MACS_peak_20334	chr14	32545870	32546053	+	53.24	NA	promoter-TSS (NM_001173)	promoter-TSS (NM_001173)	-56	NR_027263	84837	Hs.496755	NM_032751		ARHGAP5-AS1	C14orf128	ARHGAP5 antisense RNA 1 (head to head)	ncRNA
MACS_peak_35660	chr17	79829581	79830237	+	307.69	NA	promoter-TSS (NM_001301242)	promoter-TSS (NM_001301242)	-696	NR_125441	396	Hs.159161	NM_004309	ENSG00000141522	ARHGDIA	GDIA1|HEL-S-47e|NPHS8|RHOGDI|RHOGDI-1	Rho GDP dissociation inhibitor alpha	protein-coding
MACS_peak_39934	chr19	42388139	42388599	+	180.37	NA	promoter-TSS (NM_199002)	promoter-TSS (NM_199002)	-141	NM_199002	9138	Hs.631550	NM_004706	ENSG00000076928	ARHGEF1	GEF1|IMD62|LBCL2|LSC|P115-RHOGEF|SUB1.5	Rho guanine nucleotide exchange factor 1	protein-coding
MACS_peak_7101	chr1	157015623	157015894	+	74.68	NA	promoter-TSS (NM_198236)	promoter-TSS (NM_198236)	-224	NM_014784	9826	Hs.516954	NM_014784	ENSG00000132694	ARHGEF11	GTRAP48|PDZ-RHOGEF	Rho guanine nucleotide exchange factor 11	protein-coding
MACS_peak_15305	chr11	73018163	73018561	+	120.55	NA	promoter-TSS (NM_014786)	promoter-TSS (NM_014786)	-959	NM_014786	9828	Hs.533719	NM_014786	ENSG00000110237	ARHGEF17	P164RHOGEF|RHOGEF17|TEM4|p164-RhoGEF	Rho guanine nucleotide exchange factor 17	protein-coding
MACS_peak_15306	chr11	73019003	73019171	+	60.82	NA	promoter-TSS (NM_014786)	promoter-TSS (NM_014786)	-234	NM_014786	9828	Hs.533719	NM_014786	ENSG00000110237	ARHGEF17	P164RHOGEF|RHOGEF17|TEM4|p164-RhoGEF	Rho guanine nucleotide exchange factor 17	protein-coding
MACS_peak_1728	chr1	16539644	16539869	+	52.56	NA	promoter-TSS (NM_153213)	promoter-TSS (NM_153213)	-609	NM_153213	128272	Hs.591532	NM_153213	ENSG00000142632	ARHGEF19	WGEF	Rho guanine nucleotide exchange factor 19	protein-coding
MACS_peak_6905	chr1	155948120	155948461	+	101.44	NA	promoter-TSS (NM_001162383)	promoter-TSS (NM_001162383)	46	NM_001162384	9181	Hs.743352	NM_004723	ENSG00000116584	ARHGEF2	GEF|GEF-H1|GEFH1|LFP40|NEDMHM|P40	Rho/Rac guanine nucleotide exchange factor 2	protein-coding
MACS_peak_6906	chr1	155948952	155949243	+	61.93	NA	promoter-TSS (NM_001162383)	promoter-TSS (NM_001162383)	-16	NM_001350110	9181	Hs.743352	NM_004723	ENSG00000116584	ARHGEF2	GEF|GEF-H1|GEFH1|LFP40|NEDMHM|P40	Rho/Rac guanine nucleotide exchange factor 2	protein-coding
MACS_peak_53507	chr3	153838795	153838960	+	58.82	NA	promoter-TSS (NM_001251963)	promoter-TSS (NM_001251963)	85	NM_001251962	26084	Hs.240845	NM_015595	ENSG00000114790	ARHGEF26	CSGEF|HMFN1864|SGEF	Rho guanine nucleotide exchange factor 26	protein-coding
MACS_peak_61790	chr5	72921353	72921692	+	112.24	NA	promoter-TSS (NM_001080479)	promoter-TSS (NM_001080479)	-461	NM_001177693	64283	Hs.482521	NM_001080479	ENSG00000214944	ARHGEF28	RGNEF|RIP2|p190RHOGEF	Rho guanine nucleotide exchange factor 28	protein-coding
MACS_peak_75952	chr9	35665075	35665451	+	146.11	NA	promoter-TSS (NM_032818)	promoter-TSS (NM_032818)	-71	NM_032818	84904	Hs.534579	NM_032818	ENSG00000137135	ARHGEF39	C9orf100	Rho guanine nucleotide exchange factor 39	protein-coding
MACS_peak_20034	chr13	111838209	111838370	+	52.4	NA	promoter-TSS (NM_001113513)	promoter-TSS (NM_001113513)	-852	NM_001113513	8874	Hs.508738	NM_003899	ENSG00000102606	ARHGEF7	BETA-PIX|COOL-1|COOL1|Nbla10314|P50|P50BP|P85|P85COOL1|P85SPR|PAK3|PIXB	Rho guanine nucleotide exchange factor 7	protein-coding
MACS_peak_2878	chr1	27021822	27022179	+	119.82	NA	promoter-TSS (NM_139135)	promoter-TSS (NM_139135)	-506	NM_139135	8289	Hs.468972	NM_006015	ENSG00000117713	ARID1A	B120|BAF250|BAF250a|BM029|C1orf4|CSS2|ELD|MRD14|OSA1|P270|SMARCF1|hELD|hOSA1	AT-rich interaction domain 1A	protein-coding
MACS_peak_17001	chr12	46122615	46122959	+	183.01	NA	promoter-TSS (NM_152641)	promoter-TSS (NM_152641)	-702	NM_152641	196528	Hs.317304	NM_152641	ENSG00000189079	ARID2	BAF200|CSS6|p200	AT-rich interaction domain 2	protein-coding
MACS_peak_36797	chr19	925455	925924	+	219.9	NA	promoter-TSS (NM_005224)	promoter-TSS (NM_005224)	-346	NM_005224	1820	Hs.501296	NM_005224	ENSG00000116017	ARID3A	BRIGHT|DRIL1|DRIL3|E2FBP1	AT-rich interaction domain 3A	protein-coding
MACS_peak_23994	chr15	74833069	74833420	+	150.71	NA	promoter-TSS (NM_001307939)	promoter-TSS (NM_001307939)	-274	NM_001307939	10620	Hs.647642	NM_006465	ENSG00000179361	ARID3B	BDP|DRIL2	AT-rich interaction domain 3B	protein-coding
MACS_peak_20660	chr14	58765163	58765615	+	162.63	NA	promoter-TSS (NR_029434)	promoter-TSS (NR_029434)	116	NM_002892	5926	Hs.161000	NM_002892	ENSG00000032219	ARID4A	RBBP-1|RBBP1|RBP-1|RBP1	AT-rich interaction domain 4A	protein-coding
MACS_peak_9393	chr1	235490979	235491529	+	197.55	NA	promoter-TSS (NR_036605)	promoter-TSS (NR_036605)	240	NR_135074	51742	Hs.575782	NM_016374	ENSG00000054267	ARID4B	BCAA|BRCAA1|RBBP1L1|RBP1L1|SAP180	AT-rich interaction domain 4B	protein-coding
MACS_peak_23781	chr15	72766314	72766981	+	286.69	NA	promoter-TSS (NR_135678)	promoter-TSS (NR_135678)	-24	NM_005744	25820	Hs.268787	NM_005744	ENSG00000166233	ARIH1	ARI|HARI|HHARI|UBCH7BP	ariadne RBR E3 ubiquitin protein ligase 1	protein-coding
MACS_peak_51917	chr3	48955787	48956715	+	451.77	NA	promoter-TSS (NM_001349230)	promoter-TSS (NM_001349230)	-24	NM_001349219	10425	Hs.633601	NM_006321	ENSG00000177479	ARIH2	ARI2|TRIAD1	ariadne RBR E3 ubiquitin protein ligase 2	protein-coding
MACS_peak_51916	chr3	48955424	48955658	+	63.29	NA	promoter-TSS (NM_001349230)	promoter-TSS (NM_001349230)	-734	NM_001349219	10425	Hs.633601	NM_006321	ENSG00000177479	ARIH2	ARI2|TRIAD1	ariadne RBR E3 ubiquitin protein ligase 2	protein-coding
MACS_peak_51918	chr3	48956802	48957017	+	72.04	NA	promoter-TSS (NR_161301)	promoter-TSS (NR_161301)	-91	NR_161301	646450	Hs.720727	NM_001123040	ENSG00000221883	ARIH2OS	C3orf71	ariadne RBR E3 ubiquitin protein ligase 2 opposite strand	ncRNA
MACS_peak_52727	chr3	93698824	93699364	+	270.25	NA	promoter-TSS (NR_135621)	promoter-TSS (NR_135621)	95	NR_135621	200894	Hs.533086	NM_144996	ENSG00000169379	ARL13B	ARL2L1|JBTS8	ADP ribosylation factor like GTPase 13B	protein-coding
MACS_peak_12482	chr11	30344434	30344680	+	91.97	NA	promoter-TSS (NM_152316)	promoter-TSS (NM_152316)	-94	NM_152316	120534	Hs.502208	NM_152316	ENSG00000152219	ARL14EP	ARF7EP|C11orf46|dJ299F11.1	ADP ribosylation factor like GTPase 14 effector protein	protein-coding
MACS_peak_61197	chr5	53605611	53607112	+	585.73	NA	promoter-TSS (NM_019087)	promoter-TSS (NM_019087)	42	NM_019087	54622	Hs.659125	NM_019087	ENSG00000185305	ARL15	ARFRP2	ADP ribosylation factor like GTPase 15	protein-coding
MACS_peak_33108	chr17	45126857	45127202	+	64.49	NA	promoter-TSS (NM_001330240).3	promoter-TSS (NM_001330240).3	-311	NM_001330244	51326	Hs.559259	NM_016632	ENSG00000185829	ARL17A	ARF1P2|ARL17P1	ADP ribosylation factor like GTPase 17A	protein-coding
MACS_peak_33074	chr17	44657006	44657531	+	200.75	NA	promoter-TSS (NM_001288812)	promoter-TSS (NM_001288812)	-180	NM_001288811	51326	Hs.559259	NM_016632	ENSG00000185829	ARL17A	ARF1P2|ARL17P1	ADP ribosylation factor like GTPase 17A	protein-coding
MACS_peak_33075	chr17	44657827	44658067	+	83.92	NA	promoter-TSS (NM_001288812)	promoter-TSS (NM_001288812)	-859	NM_001288811	51326	Hs.559259	NM_016632	ENSG00000185829	ARL17A	ARF1P2|ARL17P1	ADP ribosylation factor like GTPase 17A	protein-coding
MACS_peak_33055	chr17	44439241	44439380	+	68.38	NA	promoter-TSS (NM_001103154)	promoter-TSS (NM_001103154)	-147	NM_001330244	51326	Hs.559259	NM_016632	ENSG00000185829	ARL17A	ARF1P2|ARL17P1	ADP ribosylation factor like GTPase 17A	protein-coding
MACS_peak_33057	chr17	44440065	44440190	+	52.14	NA	promoter-TSS (NM_001103154)	promoter-TSS (NM_001103154)	-964	NM_001330244	51326	Hs.559259	NM_016632	ENSG00000185829	ARL17A	ARF1P2|ARL17P1	ADP ribosylation factor like GTPase 17A	protein-coding
MACS_peak_33056	chr17	44439501	44439629	+	51.07	NA	promoter-TSS (NM_001103154)	promoter-TSS (NM_001103154)	-402	NM_001330244	51326	Hs.559259	NM_016632	ENSG00000185829	ARL17A	ARF1P2|ARL17P1	ADP ribosylation factor like GTPase 17A	protein-coding
MACS_peak_11301	chr10	104473734	104473895	+	60.17	NA	promoter-TSS (NR_146992)	promoter-TSS (NR_146992)	340	NM_004311	403	Hs.182215	NM_004311	ENSG00000138175	ARL3	ARFL3|JBTS35|RP83	ADP ribosylation factor like GTPase 3	protein-coding
MACS_peak_11302	chr10	104474049	104474240	+	50.98	NA	promoter-TSS (NR_146992)	promoter-TSS (NR_146992)	10	NM_004311	403	Hs.182215	NM_004311	ENSG00000138175	ARL3	ARFL3|JBTS35|RP83	ADP ribosylation factor like GTPase 3	protein-coding
MACS_peak_68328	chr7	12726710	12727286	+	291.94	NA	promoter-TSS (NM_005738)	promoter-TSS (NM_005738)	87	NM_001195396	10124	Hs.245540	NM_005738	ENSG00000122644	ARL4A	ARL4	ADP ribosylation factor like GTPase 4A	protein-coding
MACS_peak_68327	chr7	12726004	12726492	+	199.18	NA	promoter-TSS (NM_001195396)	promoter-TSS (NM_001195396)	-204	NM_212460	10124	Hs.245540	NM_005738	ENSG00000122644	ARL4A	ARL4	ADP ribosylation factor like GTPase 4A	protein-coding
MACS_peak_32607	chr17	41475498	41475729	+	64.57	NA	promoter-TSS (NM_001661)	promoter-TSS (NM_001661)	-748	NM_001661	379	Hs.183153	NM_001661	ENSG00000175906	ARL4D	ARF4L|ARL6	ADP ribosylation factor like GTPase 4D	protein-coding
MACS_peak_32606	chr17	41475286	41475476	+	50.51	NA	promoter-TSS (NM_001661)	promoter-TSS (NM_001661)	-980	NM_001661	379	Hs.183153	NM_001661	ENSG00000175906	ARL4D	ARF4L|ARL6	ADP ribosylation factor like GTPase 4D	protein-coding
MACS_peak_9994	chr10	18948703	18949018	+	74.92	NA	promoter-TSS (NM_001351116)	promoter-TSS (NM_001351116)	500	NM_178815	221079	Hs.25362	NM_178815	ENSG00000165997	ARL5B	ARL8	ADP ribosylation factor like GTPase 5B	protein-coding
MACS_peak_27301	chr16	18812685	18813567	+	608.53	NA	promoter-TSS (NM_015161)	promoter-TSS (NM_015161)	-255	NM_015161	23204	Hs.634882	NM_015161	ENSG00000170540	ARL6IP1	AIP1|ARL6IP|ARMER|SPG61	ADP ribosylation factor like GTPase 6 interacting protein 1	protein-coding
MACS_peak_43598	chr2	153574695	153574857	+	73.83	NA	promoter-TSS (NM_001365601)	promoter-TSS (NM_001365601)	-62	NR_146426	151188	Hs.643580	NM_152522	ENSG00000177917	ARL6IP6	AIP-6|AIP6|PFAAP1	ADP ribosylation factor like GTPase 6 interacting protein 6	protein-coding
MACS_peak_43600	chr2	153575218	153575654	+	174.71	NA	promoter-TSS (NM_001354432)	promoter-TSS (NM_001354432)	285	NR_146431	151188	Hs.643580	NM_152522	ENSG00000177917	ARL6IP6	AIP-6|AIP6|PFAAP1	ADP ribosylation factor like GTPase 6 interacting protein 6	protein-coding
MACS_peak_43599	chr2	153575058	153575208	+	57.14	NA	promoter-TSS (NM_001354432)	intron (NR_146423, intron 1 of 3)	-18	NR_146429	151188	Hs.643580	NM_152522	ENSG00000177917	ARL6IP6	AIP-6|AIP6|PFAAP1	ADP ribosylation factor like GTPase 6 interacting protein 6	protein-coding
MACS_peak_50746	chr3	5163823	5164263	+	232.44	NA	promoter-TSS (NM_018184)	promoter-TSS (NM_018184)	66	NM_018184	55207	Hs.250009	NM_018184	ENSG00000134108	ARL8B	ARL10C|Gie1	ADP ribosylation factor like GTPase 8B	protein-coding
MACS_peak_50745	chr3	5163213	5163364	+	50.14	NA	promoter-TSS (NM_018184)	promoter-TSS (NM_018184)	-689	NM_018184	55207	Hs.250009	NM_018184	ENSG00000134108	ARL8B	ARL10C|Gie1	ADP ribosylation factor like GTPase 8B	protein-coding
MACS_peak_28336	chr16	31469375	31469861	+	220.24	NA	promoter-TSS (NM_001288767)	promoter-TSS (NM_001288767)	-7	NM_001288767	79798	Hs.732945	NM_024742	ENSG00000140691	ARMC5	AIMAH2	armadillo repeat containing 5	protein-coding
MACS_peak_28337	chr16	31470055	31470321	+	105.49	NA	promoter-TSS (NM_001105247)	promoter-TSS (NM_001105247)	13	NM_001301820	79798	Hs.732945	NM_024742	ENSG00000140691	ARMC5	AIMAH2	armadillo repeat containing 5	protein-coding
MACS_peak_82775	chrX	101854177	101854463	+	79.26	NA	promoter-TSS (NM_001199818)	promoter-TSS (NM_001199818)	44	NM_001199818	100528062	Hs.522729	NM_001199818	ENSG00000286237	ARMCX5-GPRASP2	ARMCX5-GPRASP2-BHLHB9-LINC00630|bHLHb9|p60TRP	ARMCX5-GPRASP2 readthrough	protein-coding
MACS_peak_4119	chr1	45140329	45140596	+	71.21	NA	promoter-TSS (NM_001300746)	promoter-TSS (NM_001300746)	76	NM_001145636	339541	Hs.173679	NM_001004307	ENSG00000198520	ARMH1	C1orf228|NCRNA00082|p40	armadillo like helical domain containing 1	protein-coding
MACS_peak_6364	chr1	150849411	150849616	+	58.24	NA	promoter-TSS (NM_178427)	promoter-TSS (NM_178427)	-438	NM_001350225	405	Hs.632446	NM_001668	ENSG00000143437	ARNT	HIF-1-beta|HIF-1beta|HIF1-beta|HIF1B|HIF1BETA|TANGO|bHLHe2	aryl hydrocarbon receptor nuclear translocator	protein-coding
MACS_peak_70586	chr7	98922825	98923665	+	424.45	NA	promoter-TSS (NM_001190996)	promoter-TSS (NM_001190996)	-251	NM_001190996	10552	Hs.124126	NM_006409	ENSG00000241685	ARPC1A	Arc40|HEL-68|HEL-S-307|SOP2Hs|SOP2L	actin related protein 2/3 complex subunit 1A	protein-coding
MACS_peak_44619	chr2	219081497	219081926	+	244.28	NA	promoter-TSS (NM_005731)	promoter-TSS (NM_005731)	-201	NM_152862	10109	Hs.529303	NM_005731	ENSG00000163466	ARPC2	ARC34|PNAS-139|PRO2446|p34-Arc	actin related protein 2/3 complex subunit 2	protein-coding
MACS_peak_44620	chr2	219082008	219082222	+	53.82	NA	promoter-TSS (NM_005731)	promoter-TSS (NM_005731)	-5	NM_005731	10109	Hs.529303	NM_005731	ENSG00000163466	ARPC2	ARC34|PNAS-139|PRO2446|p34-Arc	actin related protein 2/3 complex subunit 2	protein-coding
MACS_peak_7647	chr1	183604512	183605499	+	441.23	NA	promoter-TSS (NM_001297669)	promoter-TSS (NM_001297669)	-87	NM_005717	10092	Hs.518609	NM_005717	ENSG00000162704	ARPC5	ARC16|dJ127C7.3|p16-Arc	actin related protein 2/3 complex subunit 5	protein-coding
MACS_peak_7646	chr1	183604270	183604433	+	53.63	NA	promoter-TSS (NM_001297669)	promoter-TSS (NM_001297669)	567	NM_001270439	10092	Hs.518609	NM_005717	ENSG00000162704	ARPC5	ARC16|dJ127C7.3|p16-Arc	actin related protein 2/3 complex subunit 5	protein-coding
MACS_peak_24945	chr15	90456402	90456742	+	69.44	NA	promoter-TSS (NM_182616)	promoter-TSS (NM_182616)	-388	NM_001199058	100526783		NM_001199058	ENSG00000250021	ARPIN-AP3S2	ARPIN|C15orf38|C15orf38-AP3S2	ARPIN-AP3S2 readthrough	protein-coding
MACS_peak_22822	chr15	52860957	52861590	+	205.11	NA	promoter-TSS (NM_001330309)	promoter-TSS (NM_001330309)	-46	NM_001306196	10776	Hs.512908	NM_006628	ENSG00000128989	ARPP19	ARPP-16|ARPP-19|ARPP16|ENSAL	cAMP regulated phosphoprotein 19	protein-coding
MACS_peak_29991	chr17	4613339	4613719	+	126.12	NA	promoter-TSS (NM_001257329)	promoter-TSS (NM_001257329)	-398	NM_004313	409	Hs.435811	NM_004313	ENSG00000141480	ARRB2	ARB2|ARR2|BARR2	arrestin beta 2	protein-coding
MACS_peak_82037	chr9	140512670	140513377	+	160.79	NA	promoter-TSS (NM_024757)	promoter-TSS (NM_024757)	-42	NR_122036	85026	Hs.522520	NM_032937	ENSG00000203993	ARRDC1-AS1	C9orf37	ARRDC1 antisense RNA 1	ncRNA
MACS_peak_39046	chr19	18118225	18118376	+	50.14	NA	promoter-TSS (NM_015683)	promoter-TSS (NM_015683)	-679	NM_001286826	27106	Hs.515249	NM_015683	ENSG00000105643	ARRDC2	CLONE24945|PP2703	arrestin domain containing 2	protein-coding
MACS_peak_39044	chr19	18111752	18112184	+	136.15	NA	promoter-TSS (NM_001025604)	promoter-TSS (NM_001025604)	35	NM_001025604	27106	Hs.515249	NM_015683	ENSG00000105643	ARRDC2	CLONE24945|PP2703	arrestin domain containing 2	protein-coding
MACS_peak_39043	chr19	18110999	18111248	+	68.44	NA	promoter-TSS (NM_001025604)	promoter-TSS (NM_001025604)	-810	NM_001025604	27106	Hs.515249	NM_015683	ENSG00000105643	ARRDC2	CLONE24945|PP2703	arrestin domain containing 2	protein-coding
MACS_peak_62094	chr5	90675645	90676042	+	99.61	NA	promoter-TSS (NR_138071)	promoter-TSS (NR_138071)	71	NR_138071	57561	Hs.24684	NM_020801	ENSG00000113369	ARRDC3	TLIMP	arrestin domain containing 3	protein-coding
MACS_peak_62096	chr5	90679048	90679740	+	364.02	NA	promoter-TSS (NM_020801)	promoter-TSS (NM_020801)	-260	NR_138072	57561	Hs.24684	NM_020801	ENSG00000113369	ARRDC3	TLIMP	arrestin domain containing 3	protein-coding
MACS_peak_50666	chr22	51066876	51067216	+	83.16	NA	promoter-TSS (NM_001085425)	promoter-TSS (NM_001085425)	-466	NM_001085428	410	Hs.88251	NM_000487	ENSG00000100299	ARSA	ASA|MLD	arylsulfatase A	protein-coding
MACS_peak_61903	chr5	78281581	78281837	+	53.76	NA	promoter-TSS (NM_198709)	promoter-TSS (NM_198709)	72	NM_198709	411	Hs.149103	NM_000046	ENSG00000113273	ARSB	ASB|G4S|MPS6	arylsulfatase B	protein-coding
MACS_peak_34258	chr17	66255217	66255408	+	69.14	NA	promoter-TSS (NM_014960)	promoter-TSS (NM_014960)	1	NM_001352903	22901	Hs.437249	NM_014960	ENSG00000141337	ARSG	USH4	arylsulfatase G	protein-coding
MACS_peak_55394	chr4	114900992	114901215	+	79.58	NA	promoter-TSS (NM_001354210)	promoter-TSS (NM_001354210)	-300	NM_024590	79642	Hs.22895	NM_024590	ENSG00000180801	ARSJ	ASJ	arylsulfatase family member J	protein-coding
MACS_peak_62146	chr5	94890871	94891177	+	60.28	NA	promoter-TSS (NM_014639)	promoter-TSS (NM_014639)	219	NM_198150	153642	Hs.585051	NM_198150	ENSG00000164291	ARSK	TSULF	arylsulfatase family member K	protein-coding
MACS_peak_11934	chr11	3666139	3666357	+	57.98	NA	promoter-TSS (NM_004314)	promoter-TSS (NM_004314)	-110	NM_004314	417	Hs.382188	NM_004314	ENSG00000129744	ART1	ART2|ARTC1|CD296|RT6	ADP-ribosyltransferase 1	protein-coding
MACS_peak_4064	chr1	44399039	44399342	+	95.04	NA	promoter-TSS (NM_001136215)	promoter-TSS (NM_001136215)	198	NM_057090	9048	Hs.632404	NM_003976	ENSG00000117407	ARTN	ART|ENOVIN|EVN|NBN	artemin	protein-coding
MACS_peak_9223	chr1	231114530	231115198	+	272.84	NA	promoter-TSS (NM_001122835)	promoter-TSS (NM_001122835)	24	NM_022786	64801	Hs.275736	NM_022786	ENSG00000173409	ARV1	EIEE38	ARV1 homolog, fatty acid homeostasis modulator	protein-coding
MACS_peak_72350	chr8	17941760	17941919	+	54.15	NA	promoter-TSS (NR_125430)	promoter-TSS (NR_125430)	-223	NM_177924	427	Hs.527412	NM_004315	ENSG00000104763	ASAH1	AC|ACDase|ASAH|PHP|PHP32|SMAPME	N-acylsphingosine amidohydrolase 1	protein-coding
MACS_peak_72349	chr8	17941382	17941669	+	104.88	NA	promoter-TSS (NM_001363743)	promoter-TSS (NM_001363743)	91	NM_177924	427	Hs.527412	NM_004315	ENSG00000104763	ASAH1	AC|ACDase|ASAH|PHP|PHP32|SMAPME	N-acylsphingosine amidohydrolase 1	protein-coding
MACS_peak_32728	chr17	42263540	42263760	+	56.99	NA	promoter-TSS (NM_001353186)	promoter-TSS (NM_001353186)	435	NR_049729	339201	Hs.656564	NM_178542	ENSG00000267080	ASB16-AS1	C17orf65	ASB16 antisense RNA 1	ncRNA
MACS_peak_10633	chr10	73975657	73976091	+	176.07	NA	promoter-TSS (NM_001198798)	promoter-TSS (NM_001198798)	-7	NM_001198798	51008	Hs.500007	NM_015947	ENSG00000138303	ASCC1	ASC1p50|CGI-18|SMABF2|p50	activating signal cointegrator 1 complex subunit 1	protein-coding
MACS_peak_49130	chr22	30234168	30234376	+	71.24	NA	promoter-TSS (NM_001369925)	promoter-TSS (NM_001369925)	-9	NM_001369940	84164	Hs.731754	NM_032204	ENSG00000100325	ASCC2	ASC1p100|p100	activating signal cointegrator 1 complex subunit 2	protein-coding
MACS_peak_66575	chr6	101328941	101329414	+	178.46	NA	promoter-TSS (NM_006828)	promoter-TSS (NM_006828)	28	NM_006828	10973	Hs.486031	NM_006828	ENSG00000112249	ASCC3	ASC1p200|HELIC1|RNAH	activating signal cointegrator 1 complex subunit 3	protein-coding
MACS_peak_66773	chr6	119214883	119215069	+	78.95	NA	promoter-TSS (NM_014034)	promoter-TSS (NM_014034)	-340	NM_014034	25842	Hs.292316	NM_014034	ENSG00000111875	ASF1A	CGI-98|CIA|HSPC146	anti-silencing function 1A histone chaperone	protein-coding
MACS_peak_6854	chr1	155532695	155533394	+	276.14	NA	promoter-TSS (NM_018489)	promoter-TSS (NM_018489)	-450	NM_001366177	55870	Hs.491060	NM_018489	ENSG00000116539	ASH1L	ASH1|ASH1L1|KMT2H|MRD52	ASH1 like histone lysine methyltransferase	protein-coding
MACS_peak_72702	chr8	37962547	37962918	+	179.49	NA	promoter-TSS (NM_001261832)	promoter-TSS (NM_001261832)	-279	NM_001282272	9070	Hs.521530	NM_004674	ENSG00000129691	ASH2L	ASH2|ASH2L1|ASH2L2|Bre2	ASH2 like, histone lysine methyltransferase complex subunit	protein-coding
MACS_peak_72703	chr8	37962931	37963259	+	101.34	NA	promoter-TSS (NM_001261832)	promoter-TSS (NM_001261832)	48	NM_004674	9070	Hs.521530	NM_004674	ENSG00000129691	ASH2L	ASH2|ASH2L1|ASH2L2|Bre2	ASH2 like, histone lysine methyltransferase complex subunit	protein-coding
MACS_peak_17343	chr12	50451059	50451298	+	75.55	NA	promoter-TSS (NM_001095)	promoter-TSS (NM_001095)	-201	NR_046389	41	Hs.274361	NM_001095	ENSG00000110881	ASIC1	ACCN2|ASIC|BNaC2	acid sensing ion channel subunit 1	protein-coding
MACS_peak_70505	chr7	97501566	97501814	+	75.43	NA	promoter-TSS (NM_001673)	promoter-TSS (NM_001673)	30	NM_001178075	440	Hs.489207	NM_001673	ENSG00000070669	ASNS	ASNSD|TS11	asparagine synthetase (glutamine-hydrolyzing)	protein-coding
MACS_peak_44006	chr2	190525907	190526618	+	265.33	NA	promoter-TSS (NM_019048)	promoter-TSS (NM_019048)	77	NM_019048	54529	Hs.101364	NM_019048	ENSG00000138381	ASNSD1	NBLA00058|NS3TP1	asparagine synthetase domain containing 1	protein-coding
MACS_peak_72995	chr8	62626975	62627479	+	248.21	NA	promoter-TSS (NM_032466)	promoter-TSS (NM_032466)	-28	NM_001164756	444	Hs.332422	NM_004318	ENSG00000198363	ASPH	AAH|BAH|CASQ2BP1|FDLAB|HAAH|JCTN|junctin	aspartate beta-hydroxylase	protein-coding
MACS_peak_42435	chr2	70189402	70189559	+	54.8	NA	promoter-TSS (NM_152792)	promoter-TSS (NM_152792)	-83	NM_152792	151516	Hs.516253	NM_152792	ENSG00000244617	ASPRV1	MUNO|SASP|SASPase|Taps	aspartic peptidase retroviral like 1	protein-coding
MACS_peak_35715	chr17	79935385	79935690	+	85.54	NA	promoter-TSS (NM_001330528)	promoter-TSS (NM_001330528)	32	NR_045351	79058	Hs.298351	NM_024083	ENSG00000169696	ASPSCR1	ASPCR1|ASPL|ASPS|RCC17|TUG|UBXD9|UBXN9	ASPSCR1 tether for SLC2A4, UBX domain containing	protein-coding
MACS_peak_45537	chr20	30946717	30946948	+	60.97	NA	promoter-TSS (NM_001363734)	promoter-TSS (NM_001363734)	-36	NM_001363734	171023	Hs.374043	NM_015338	ENSG00000171456	ASXL1	BOPS|MDS	ASXL transcriptional regulator 1	protein-coding
MACS_peak_45536	chr20	30945636	30946385	+	362.6	NA	promoter-TSS (NM_001164603)	promoter-TSS (NM_001164603)	-137	NM_015338	171023	Hs.374043	NM_015338	ENSG00000171456	ASXL1	BOPS|MDS	ASXL transcriptional regulator 1	protein-coding
MACS_peak_45535	chr20	30945352	30945597	+	55	NA	promoter-TSS (NM_001164603)	promoter-TSS (NM_001164603)	-673	NM_015338	171023	Hs.374043	NM_015338	ENSG00000171456	ASXL1	BOPS|MDS	ASXL transcriptional regulator 1	protein-coding
MACS_peak_41628	chr2	26100923	26101605	+	244.7	NA	promoter-TSS (NM_018263)	promoter-TSS (NM_018263)	92	NM_018263	55252	Hs.119815	NM_018263	ENSG00000143970	ASXL2	ASXH2|SHAPNS	ASXL transcriptional regulator 2	protein-coding
MACS_peak_10947	chr10	89577593	89578117	+	276.2	NA	promoter-TSS (NR_028492)	promoter-TSS (NR_028492)	133	NR_135914	84896	Hs.435948	NM_032810	ENSG00000138138	ATAD1	AFDC1|FNP001|HKPX4|THORASE	ATPase family AAA domain containing 1	protein-coding
MACS_peak_73734	chr8	124408538	124409199	+	347.19	NA	promoter-TSS (NM_014109)	promoter-TSS (NM_014109)	-181	NM_014109	29028	Hs.370834	NM_014109	ENSG00000156802	ATAD2	ANCCA|CT137|PRO2000	ATPase family AAA domain containing 2	protein-coding
MACS_peak_252	chr1	1447048	1447604	+	227.24	NA	promoter-TSS (NM_001170535)	promoter-TSS (NM_001170535)	-216	NM_001170535	55210	Hs.23413	NM_018188	ENSG00000197785	ATAD3A	HAYOS	ATPase family AAA domain containing 3A	protein-coding
MACS_peak_242	chr1	1406776	1407201	+	160.56	NA	promoter-TSS (NM_031921)	promoter-TSS (NM_031921)	-157	NM_031921	83858	Hs.729021	NM_031921	ENSG00000160072	ATAD3B	AAA-TOB3|TOB3	ATPase family AAA domain containing 3B	protein-coding
MACS_peak_247	chr1	1413171	1413385	+	75.91	NA	promoter-TSS (NM_001317238)	promoter-TSS (NM_001317238)	49	NM_001317238	83858	Hs.729021	NM_031921	ENSG00000160072	ATAD3B	AAA-TOB3|TOB3	ATPase family AAA domain containing 3B	protein-coding
MACS_peak_31483	chr17	29158764	29159311	+	298.41	NA	promoter-TSS (NM_024857)	promoter-TSS (NM_024857)	53	NM_024857	79915	Hs.528902	NM_024857	ENSG00000176208	ATAD5	C17orf41|ELG1|FRAG1	ATPase family AAA domain containing 5	protein-coding
MACS_peak_17409	chr12	51157108	51157811	+	376.16	NA	promoter-TSS (NM_005171)	promoter-TSS (NM_005171)	-425	NM_005171	466	Hs.648565	NM_005171	ENSG00000123268	ATF1	EWS-ATF1|FUS/ATF-1|TREB36	activating transcription factor 1	protein-coding
MACS_peak_43855	chr2	176032538	176033554	+	504.48	NA	promoter-TSS (NM_001256091)	promoter-TSS (NM_001256091)	-112	NM_001256091	1386	Hs.592510	NM_001880	ENSG00000115966	ATF2	CRE-BP1|CREB-2|CREB2|HB16|TREB7	activating transcription factor 2	protein-coding
MACS_peak_49502	chr22	39915973	39916752	+	353.69	NA	promoter-TSS (NM_001675)	promoter-TSS (NM_001675)	-202	NM_001675	468	Hs.496487	NM_001675	ENSG00000128272	ATF4	CREB-2|CREB2|TAXREB67|TXREB	activating transcription factor 4	protein-coding
MACS_peak_49501	chr22	39915601	39915890	+	89.97	NA	promoter-TSS (NM_001675)	promoter-TSS (NM_001675)	-819	NM_001675	468	Hs.496487	NM_001675	ENSG00000128272	ATF4	CREB-2|CREB2|TAXREB67|TXREB	activating transcription factor 4	protein-coding
MACS_peak_40897	chr19	50432287	50432572	+	98.84	NA	promoter-TSS (NM_001193646)	promoter-TSS (NM_001193646)	29	NM_001193646	22809	Hs.9754	NM_012068	ENSG00000169136	ATF5	ATFX|HMFN0395	activating transcription factor 5	protein-coding
MACS_peak_17751	chr12	54019655	54020295	+	234.83	NA	promoter-TSS (NM_001366556)	promoter-TSS (NM_001366556)	191	NM_001366561	11016	Hs.12286	NM_006856	ENSG00000170653	ATF7	ATFA	activating transcription factor 7	protein-coding
MACS_peak_61986	chr5	81267733	81267982	+	111.03	NA	promoter-TSS (NM_001131028)	promoter-TSS (NM_001131028)	15	NM_031482	83734	Hs.713698	NM_031482	ENSG00000152348	ATG10	APG10|APG10L|pp12616	autophagy related 10	protein-coding
MACS_peak_17492	chr12	52463259	52463658	+	220.54	NA	promoter-TSS (NM_001098673)	promoter-TSS (NM_001098673)	-300	NM_021934	60673	Hs.9911	NM_021934	ENSG00000123395	ATG101	C12orf44	autophagy related 101	protein-coding
MACS_peak_17493	chr12	52463667	52464007	+	113.8	NA	promoter-TSS (NM_001098673)	promoter-TSS (NM_001098673)	75	NM_001098673	60673	Hs.9911	NM_021934	ENSG00000123395	ATG101	C12orf44	autophagy related 101	protein-coding
MACS_peak_62411	chr5	115177114	115177617	+	187.66	NA	promoter-TSS (NM_001002924)	promoter-TSS (NM_001002924)	-103	NM_004707	9140	Hs.264482	NM_004707	ENSG00000145782	ATG12	APG12|APG12L|FBR93|HAPG12	autophagy related 12	protein-coding
MACS_peak_12840	chr11	46638957	46639868	+	427.64	NA	promoter-TSS (NM_173811)	promoter-TSS (NM_173811)	586	NM_001346329	9776	Hs.127403	NM_014741	ENSG00000175224	ATG13	KIAA0652|PARATARG8	autophagy related 13	protein-coding
MACS_peak_20635	chr14	55878448	55878787	+	134.06	NA	promoter-TSS (NM_014924)	promoter-TSS (NM_014924)	-41	NM_014924	22863	Hs.414809	NM_014924	ENSG00000126775	ATG14	ATG14L|BARKOR|KIAA0831	autophagy related 14	protein-coding
MACS_peak_45098	chr2	234160017	234160454	+	189.15	NA	promoter-TSS (NM_001363742)	promoter-TSS (NM_001363742)	18	NM_198890	55054	Hs.529322	NM_017974	ENSG00000085978	ATG16L1	APG16L|ATG16A|ATG16L|IBD10|WDR30	autophagy related 16 like 1	protein-coding
MACS_peak_15280	chr11	72524730	72525586	+	191.95	NA	promoter-TSS (NM_033388)	promoter-TSS (NM_033388)	-298	NM_001318766	89849	Hs.653186	NM_033388	ENSG00000168010	ATG16L2	ATG16B|WDR80	autophagy related 16 like 2	protein-coding
MACS_peak_15279	chr11	72524463	72524689	+	51.73	NA	promoter-TSS (NM_033388)	promoter-TSS (NM_033388)	-880	NM_001318766	89849	Hs.653186	NM_033388	ENSG00000168010	ATG16L2	ATG16B|WDR80	autophagy related 16 like 2	protein-coding
MACS_peak_21267	chr14	96829575	96829794	+	87.82	NA	promoter-TSS (NM_016472)	promoter-TSS (NM_016472)	-6	NM_018036	55102	Hs.168241	NM_018036	ENSG00000066739	ATG2B	C14orf103	autophagy related 2B	protein-coding
MACS_peak_52847	chr3	112280608	112280861	+	125.02	NA	promoter-TSS (NM_001278712)	promoter-TSS (NM_001278712)	75	NM_022488	64422	Hs.477126	NM_022488	ENSG00000144848	ATG3	APG3|APG3-LIKE|APG3L|PC3-96	autophagy related 3	protein-coding
MACS_peak_82807	chrX	107334782	107335169	+	165.7	NA	promoter-TSS (NM_001321288)	promoter-TSS (NM_001321288)	-33	NM_052936	115201	Hs.8763	NM_052936	ENSG00000101844	ATG4A	APG4A|AUTL2	autophagy related 4A cysteine peptidase	protein-coding
MACS_peak_45289	chr2	242576916	242577088	+	63.19	NA	promoter-TSS (NM_178326)	promoter-TSS (NM_178326)	-106	NM_013325	23192	Hs.283610	NM_013325	ENSG00000168397	ATG4B	APG4B|AUTL1	autophagy related 4B cysteine peptidase	protein-coding
MACS_peak_4775	chr1	63249454	63250121	+	240.86	NA	promoter-TSS (NM_032852)	promoter-TSS (NM_032852)	10	NM_178221	84938	Hs.7353	NM_032852	ENSG00000125703	ATG4C	APG4-C|APG4C|AUTL1|AUTL3	autophagy related 4C cysteine peptidase	protein-coding
MACS_peak_66602	chr6	106773169	106773824	+	318.96	NA	promoter-TSS (NM_001286106)	promoter-TSS (NM_001286106)	139	NM_004849	9474	Hs.486063	NM_004849	ENSG00000057663	ATG5	APG5|APG5-LIKE|APG5L|ASP|SCAR25|hAPG5	autophagy related 5	protein-coding
MACS_peak_50972	chr3	11313863	11314382	+	245.87	NA	promoter-TSS (NM_006395)	promoter-TSS (NM_006395)	39	NM_001144912	10533	Hs.38032	NM_006395	ENSG00000197548	ATG7	APG7-LIKE|APG7L|GSA7	autophagy related 7	protein-coding
MACS_peak_44749	chr2	220093628	220093933	+	100.72	NA	promoter-TSS (NM_001042410)	promoter-TSS (NM_001042410)	578	NM_001077198	79065	Hs.323363	NM_024085	ENSG00000198925	ATG9A	APG9L1|MGD3208|mATG9	autophagy related 9A	protein-coding
MACS_peak_44750	chr2	220094238	220094440	+	52.09	NA	promoter-TSS (NM_001042410)	promoter-TSS (NM_001042410)	19	NM_001077198	79065	Hs.323363	NM_024085	ENSG00000198925	ATG9A	APG9L1|MGD3208|mATG9	autophagy related 9A	protein-coding
MACS_peak_44529	chr2	216176326	216176946	+	305.41	NA	promoter-TSS (NM_004044)	promoter-TSS (NM_004044)	-146	NM_004044	471	Hs.90280	NM_004044	ENSG00000138363	ATIC	AICAR|AICARFT|HEL-S-70p|IMPCHASE|PURH	5-aminoimidazole-4-carboxamide ribonucleotide formyltransferase/IMP cyclohydrolase	protein-coding
MACS_peak_44528	chr2	216175964	216176267	+	79.27	NA	promoter-TSS (NM_004044)	promoter-TSS (NM_004044)	-667	NM_004044	471	Hs.90280	NM_004044	ENSG00000138363	ATIC	AICAR|AICARFT|HEL-S-70p|IMPCHASE|PURH	5-aminoimidazole-4-carboxamide ribonucleotide formyltransferase/IMP cyclohydrolase	protein-coding
MACS_peak_41905	chr2	38604650	38604959	+	97.59	NA	promoter-TSS (NM_001330463)	promoter-TSS (NM_001330463)	-239	NM_001330458	64225	Hs.594950	NM_022374	ENSG00000119787	ATL2	ARL3IP2|ARL6IP2|aip-2|atlastin2	atlastin GTPase 2	protein-coding
MACS_peak_13760	chr11	63438691	63439491	+	476.18	NA	promoter-TSS (NM_015459)	promoter-TSS (NM_015459)	-243	NM_015459	25923	Hs.356719	NM_015459	ENSG00000184743	ATL3	HSN1F	atlastin GTPase 3	protein-coding
MACS_peak_15875	chr11	108093553	108094055	+	185.83	NA	promoter-TSS (NM_001321307)	promoter-TSS (NM_001321307)	10	NM_001351834	472	Hs.367437	NM_000051	ENSG00000149311	ATM	AT1|ATA|ATC|ATD|ATDC|ATE|TEL1|TELO1	ATM serine/threonine kinase	protein-coding
MACS_peak_63745	chr5	151137966	151138250	+	94.63	NA	promoter-TSS (NM_004045)	promoter-TSS (NM_004045)	84	NM_004045	475	Hs.125213	NM_004045	ENSG00000177556	ATOX1	ATX1|HAH1	antioxidant 1 copper chaperone	protein-coding
MACS_peak_53792	chr3	182510877	182511065	+	51.81	NA	promoter-TSS (NM_014616)	promoter-TSS (NM_014616)	-321	NM_014616	23200	Hs.478429	NM_014616	ENSG00000058063	ATP11B	ATPIF|ATPIR	ATPase phospholipid transporting 11B (putative)	protein-coding
MACS_peak_39257	chr19	19774591	19774830	+	80.92	NA	promoter-TSS (NM_020410)	promoter-TSS (NM_020410)	-225	NM_020410	57130	Hs.501794	NM_020410	ENSG00000105726	ATP13A1	ATP13A|CGI-152	ATPase 13A1	protein-coding
MACS_peak_1977	chr1	17338421	17338600	+	57	NA	promoter-TSS (NM_001141974)	promoter-TSS (NM_001141974)	-87	NM_001141974	23400	Hs.128866	NM_022089	ENSG00000159363	ATP13A2	CLN12|HSA9947|KRPPD|PARK9|SPG78	ATPase cation transporting 13A2	protein-coding
MACS_peak_5699	chr1	116915646	116915924	+	91.11	NA	promoter-TSS (NM_001160233)	promoter-TSS (NM_001160233)	-81	NM_000701	476	Hs.371889	NM_000701	ENSG00000163399	ATP1A1	CMT2DD|HOMGSMR2	ATPase Na+/K+ transporting subunit alpha 1	protein-coding
MACS_peak_5702	chr1	116960959	116961330	+	178.23	NA	promoter-TSS (NR_027646)	promoter-TSS (NR_027646)	37	NR_024126	84852	Hs.664752	NM_032766	ENSG00000203865	ATP1A1-AS1	ATP1A1OS|C1orf203	ATP1A1 antisense RNA 1	ncRNA
MACS_peak_39939	chr19	42499117	42499342	+	62.15	NA	promoter-TSS (NM_152296)	promoter-TSS (NM_152296)	-847	NM_001256214	478	Hs.515427	NM_152296	ENSG00000105409	ATP1A3	AHC2|ATP1A1|CAPOS|DYT12|RDP	ATPase Na+/K+ transporting subunit alpha 3	protein-coding
MACS_peak_7138	chr1	160121349	160121516	+	50.92	NA	promoter-TSS (NM_144699)	promoter-TSS (NM_144699)	80	NM_144699	480	Hs.662219	NM_144699	ENSG00000132681	ATP1A4	ATP1A1|ATP1AL2	ATPase Na+/K+ transporting subunit alpha 4	protein-coding
MACS_peak_7353	chr1	169075343	169075773	+	199.39	NA	promoter-TSS (NM_001677)	promoter-TSS (NM_001677)	-370	NM_001677	481	Hs.291196	NM_001677	ENSG00000143153	ATP1B1	ATP1B	ATPase Na+/K+ transporting subunit beta 1	protein-coding
MACS_peak_53354	chr3	141594443	141594921	+	153.86	NA	promoter-TSS (NM_001679)	promoter-TSS (NM_001679)	-803	NM_001679	483	Hs.477789	NM_001679	ENSG00000069849	ATP1B3	ATPB-3|CD298	ATPase Na+/K+ transporting subunit beta 3	protein-coding
MACS_peak_53355	chr3	141595001	141595183	+	59.92	NA	promoter-TSS (NM_001679)	promoter-TSS (NM_001679)	-393	NM_001679	483	Hs.477789	NM_001679	ENSG00000069849	ATP1B3	ATPB-3|CD298	ATPase Na+/K+ transporting subunit beta 3	protein-coding
MACS_peak_18067	chr12	58334876	58335173	+	116.93	NA	promoter-TSS (NM_001320408)	promoter-TSS (NM_001320408)	-326	NM_001320409	91419	Hs.61188	NM_033276	ENSG00000166896	ATP23	KUB3|XRCC6BP1	ATP23 metallopeptidase and ATP synthase assembly factor homolog	protein-coding
MACS_peak_27839	chr16	28891390	28891697	+	88.9	NA	promoter-TSS (NR_046287)	promoter-TSS (NR_046287)	179	NM_001286075	487	Hs.657344	NM_004320	ENSG00000196296	ATP2A1	ATP2A|SERCA1	ATPase sarcoplasmic/endoplasmic reticulum Ca2+ transporting 1	protein-coding
MACS_peak_18629	chr12	110718570	110718741	+	50.48	NA	promoter-TSS (NM_001681)	promoter-TSS (NM_001681)	-397	NM_170665	488	Hs.506759	NM_001681	ENSG00000174437	ATP2A2	ATP2B|DAR|DD|SERCA2	ATPase sarcoplasmic/endoplasmic reticulum Ca2+ transporting 2	protein-coding
MACS_peak_29910	chr17	3867812	3868108	+	112.86	NA	promoter-TSS (NM_174958)	promoter-TSS (NM_174958)	-202	NM_174956	489	Hs.513870	NM_005173	ENSG00000074370	ATP2A3	SERCA3	ATPase sarcoplasmic/endoplasmic reticulum Ca2+ transporting 3	protein-coding
MACS_peak_18297	chr12	90103713	90104072	+	223.71	NA	promoter-TSS (NM_001366524)	promoter-TSS (NM_001366524)	-749	NM_001366526	490	Hs.506276	NM_001682	ENSG00000070961	ATP2B1	PMCA1|PMCA1kb	ATPase plasma membrane Ca2+ transporting 1	protein-coding
MACS_peak_18296	chr12	90103301	90103699	+	175.75	NA	promoter-TSS (NM_001366524)	promoter-TSS (NM_001366524)	-357	NM_001366526	490	Hs.506276	NM_001682	ENSG00000070961	ATP2B1	PMCA1|PMCA1kb	ATPase plasma membrane Ca2+ transporting 1	protein-coding
MACS_peak_8188	chr1	203595669	203596065	+	135.82	NA	promoter-TSS (NM_001684)	promoter-TSS (NM_001684)	-48	NM_001001396	493	Hs.343522	NM_001684	ENSG00000058668	ATP2B4	ATP2B2|MXRA1|PMCA4|PMCA4b|PMCA4x	ATPase plasma membrane Ca2+ transporting 4	protein-coding
MACS_peak_53199	chr3	130612339	130612836	+	208.66	NA	promoter-TSS (NM_001199179)	promoter-TSS (NM_001199179)	-272	NM_001001485	27032	Hs.584884	NM_014382	ENSG00000017260	ATP2C1	ATP2C1A|BCPM|HHD|PMR1|SPCA1|hSPCA1	ATPase secretory pathway Ca2+ transporting 1	protein-coding
MACS_peak_17977	chr12	57039487	57039889	+	202.69	NA	promoter-TSS (NR_002737)	promoter-TSS (NR_002737)	80	NM_001686	506	Hs.406510	NM_001686	ENSG00000110955	ATP5F1B	ATP5B|ATPMB|ATPSB|HEL-S-271	ATP synthase F1 subunit beta	protein-coding
MACS_peak_9856	chr10	7830230	7830436	+	71.9	NA	promoter-TSS (NR_045609)	promoter-TSS (NR_045609)	193	NM_001001973	509	Hs.271135	NM_005174	ENSG00000165629	ATP5F1C	ATP5C|ATP5C1|ATP5CL1	ATP synthase F1 subunit gamma	protein-coding
MACS_peak_36892	chr19	1241086	1241351	+	92.21	NA	promoter-TSS (NM_001687)	promoter-TSS (NM_001687)	-532	NM_001001975	513	Hs.418668	NM_001687	ENSG00000099624	ATP5F1D	ATP5D|MC5DN5	ATP synthase F1 subunit delta	protein-coding
MACS_peak_36893	chr19	1241446	1241737	+	88.9	NA	promoter-TSS (NM_001687)	promoter-TSS (NM_001687)	-159	NM_001001975	513	Hs.418668	NM_001687	ENSG00000099624	ATP5F1D	ATP5D|MC5DN5	ATP synthase F1 subunit delta	protein-coding
MACS_peak_47286	chr20	57607573	57607950	+	155.44	NA	promoter-TSS (NM_006886)	promoter-TSS (NM_006886)	-371	NM_006886	514	Hs.177530	NM_006886	ENSG00000124172	ATP5F1E	ATP5E|ATPE|MC5DN3	ATP synthase F1 subunit epsilon	protein-coding
MACS_peak_3081	chr1	28562100	28562533	+	147.84	NA	promoter-TSS (NM_178190)	promoter-TSS (NM_178190)	-286	NM_178191	93974	Hs.744914	NM_016311	ENSG00000130770	ATP5IF1	ATPI|ATPIF1|ATPIP|IP	ATP synthase inhibitory factor subunit 1	protein-coding
MACS_peak_33266	chr17	46969330	46970673	+	593.83	NA	promoter-TSS (NM_005175)	promoter-TSS (NM_005175)	-148	NM_005175	516	Hs.80986	NM_005175	ENSG00000159199	ATP5MC1	ATP5A|ATP5G|ATP5G1	ATP synthase membrane subunit c locus 1	protein-coding
MACS_peak_17754	chr12	54069668	54070407	+	339.16	NA	promoter-TSS (NM_001369755)	promoter-TSS (NM_001369755)	77	NM_001002031	517	Hs.524464	NM_005176	ENSG00000135390	ATP5MC2	ATP5A|ATP5G2	ATP synthase membrane subunit c locus 2	protein-coding
MACS_peak_11337	chr10	105156083	105156460	+	155.32	NA	promoter-TSS (NM_032747)	promoter-TSS (NM_032747)	-39	NM_001206427	84833	Hs.500921	NM_032747	ENSG00000173915	ATP5MD	DAPIT|HCVFTP2|USMG5|bA792D24.4	ATP synthase membrane subunit DAPIT	protein-coding
MACS_peak_21509	chr14	104387721	104388100	+	245.94	NA	promoter-TSS (NM_001127393)	promoter-TSS (NM_001127393)	-44	NM_001127393	9556	Hs.109052	NM_004894	ENSG00000156411	ATP5MPL	6.8PL|C14orf2|MLQ|MP68|PLPM	ATP synthase membrane subunit 6.8PL	protein-coding
MACS_peak_5583	chr1	111991727	111992381	+	227.09	NA	promoter-TSS (NM_001317062)	promoter-TSS (NM_001317062)	-32	NM_001688	515	Hs.514870	NM_001688	ENSG00000116459	ATP5PB	ATP5F1|PIG47	ATP synthase peripheral stalk-membrane subunit b	protein-coding
MACS_peak_34525	chr17	73042550	73043364	+	357.72	NA	promoter-TSS (NR_110834)	promoter-TSS (NR_110834)	107	NM_006356	10476	Hs.514465	NM_006356	ENSG00000167863	ATP5PD	APT5H|ATP5H|ATPQ	ATP synthase peripheral stalk subunit d	protein-coding
MACS_peak_34524	chr17	73042349	73042516	+	53.97	NA	promoter-TSS (NR_110834)	promoter-TSS (NR_110834)	632	NM_006356	10476	Hs.514465	NM_006356	ENSG00000167863	ATP5PD	APT5H|ATP5H|ATPQ	ATP synthase peripheral stalk subunit d	protein-coding
MACS_peak_83117	chrX	153657150	153657335	+	58.98	NA	promoter-TSS (NR_103768)	promoter-TSS (NR_103768)	219	NM_001183	537	Hs.6551	NM_001183	ENSG00000071553	ATP6AP1	16A|ATP6IP1|ATP6S1|Ac45|CF2|VATPS1|XAP-3|XAP3	ATPase H+ transporting accessory protein 1	protein-coding
MACS_peak_32471	chr17	40610166	40610352	+	58.4	NA	promoter-TSS (NM_005177)	promoter-TSS (NM_005177)	-637	NM_001130021	535	Hs.463074	NM_005177	ENSG00000033627	ATP6V0A1	ATP6N1|ATP6N1A|Stv1|VPP1|Vph1|a1	ATPase H+ transporting V0 subunit a1	protein-coding
MACS_peak_19126	chr12	124196537	124196914	+	134.59	NA	promoter-TSS (NM_012463)	promoter-TSS (NM_012463)	-175	NM_012463	23545	Hs.25786	NM_012463	ENSG00000185344	ATP6V0A2	A2|ARCL|ARCL2A|ATP6A2|ATP6N1D|J6B7|RTF|STV1|TJ6|TJ6M|TJ6S|VPH1|WSS	ATPase H+ transporting V0 subunit a2	protein-coding
MACS_peak_71845	chr7	138459188	138459337	+	61.16	NA	promoter-TSS (NM_130841)	promoter-TSS (NM_130841)	-480	NM_130841	50617	Hs.98967	NM_020632	ENSG00000105929	ATP6V0A4	A4|ATP6N1B|ATP6N2|RDRTA2|RTA1C|RTADR|STV1|VPH1|VPP2	ATPase H+ transporting V0 subunit a4	protein-coding
MACS_peak_4071	chr1	44440104	44440683	+	213.28	NA	promoter-TSS (NM_004047)	promoter-TSS (NM_004047)	-239	NM_001039457	533	Hs.596514	NM_004047	ENSG00000117410	ATP6V0B	ATP6F|HATPL|VMA16	ATPase H+ transporting V0 subunit b	protein-coding
MACS_peak_26131	chr16	2563876	2564171	+	118.61	NA	promoter-TSS (NM_001694)	promoter-TSS (NM_001694)	70	NM_001694	527	Hs.389107	NM_001694	ENSG00000185883	ATP6V0C	ATP6C|ATP6L|ATPL|VATL|VPPC|Vma3	ATPase H+ transporting V0 subunit c	protein-coding
MACS_peak_28669	chr16	67514910	67515430	+	221.13	NA	promoter-TSS (NM_004691)	promoter-TSS (NM_004691)	-110	NM_004691	9114	Hs.106876	NM_004691	ENSG00000159720	ATP6V0D1	ATP6D|ATP6DV|P39|VATX|VMA6|VPATPD	ATPase H+ transporting V0 subunit d1	protein-coding
MACS_peak_28670	chr16	67515470	67515766	+	81.65	NA	promoter-TSS (NM_004691)	promoter-TSS (NM_004691)	-558	NM_004691	9114	Hs.106876	NM_004691	ENSG00000159720	ATP6V0D1	ATP6D|ATP6DV|P39|VATX|VMA6|VPATPD	ATPase H+ transporting V0 subunit d1	protein-coding
MACS_peak_64235	chr5	172410568	172410902	+	96.73	NA	promoter-TSS (NM_003945)	promoter-TSS (NM_003945)	-39	NM_003945	8992	Hs.484188	NM_003945	ENSG00000113732	ATP6V0E1	ATP6H|ATP6V0E|M9.2|Vma21|Vma21p	ATPase H+ transporting V0 subunit e1	protein-coding
MACS_peak_71952	chr7	149569955	149570110	+	62.27	NA	promoter-TSS (NM_001367793)	promoter-TSS (NM_001367793)	-21	NM_001367793	155066	Hs.556998	NM_145230	ENSG00000171130	ATP6V0E2	ATP6V0E2L|C7orf32	ATPase H+ transporting V0 subunit e2	protein-coding
MACS_peak_52865	chr3	113465441	113465632	+	57.16	NA	promoter-TSS (NM_001308445)	promoter-TSS (NM_001308445)	-346	NM_001690	523	Hs.477155	NM_001690	ENSG00000114573	ATP6V1A	ARCL2D|ATP6A1|ATP6V1A1|HO68|IECEE3|VA68|VPP2|Vma1	ATPase H+ transporting V1 subunit A	protein-coding
MACS_peak_73567	chr8	104033109	104033446	+	149.4	NA	promoter-TSS (NM_001695)	promoter-TSS (NM_001695)	-34	NM_001695	528	Hs.86905	NM_001695	ENSG00000155097	ATP6V1C1	ATP6C|ATP6D|VATC|Vma5	ATPase H+ transporting V1 subunit C1	protein-coding
MACS_peak_20792	chr14	67826188	67826842	+	229.49	NA	promoter-TSS (NM_004094)	promoter-TSS (NM_004094)	6	NM_015994	51382	Hs.272630	NM_015994	ENSG00000100554	ATP6V1D	ATP6M|VATD|VMA8	ATPase H+ transporting V1 subunit D	protein-coding
MACS_peak_48771	chr22	18111387	18111582	+	104.77	NA	promoter-TSS (NM_001696)	promoter-TSS (NM_001696)	31	NM_001696	529	Hs.517338	NM_001696	ENSG00000131100	ATP6V1E1	ARCL2C|ATP6E|ATP6E2|ATP6V1E|P31|Vma4	ATPase H+ transporting V1 subunit E1	protein-coding
MACS_peak_71560	chr7	128503538	128503792	+	71.71	NA	promoter-TSS (NR_149055)	promoter-TSS (NR_149055)	755	NM_001198909	9296	Hs.78089	NM_004231	ENSG00000128524	ATP6V1F	ATP6S14|VATF|Vma7	ATPase H+ transporting V1 subunit F	protein-coding
MACS_peak_71559	chr7	128502655	128503125	+	173.99	NA	promoter-TSS (NM_004231)	promoter-TSS (NM_004231)	-20	NM_004231	9296	Hs.78089	NM_004231	ENSG00000128524	ATP6V1F	ATP6S14|VATF|Vma7	ATPase H+ transporting V1 subunit F	protein-coding
MACS_peak_72931	chr8	54755532	54756202	+	320.59	NA	promoter-TSS (NM_015941)	promoter-TSS (NM_015941)	4	NM_213619	51606	Hs.491737	NM_015941	ENSG00000047249	ATP6V1H	CGI-11|MSTP042|NBP1|SFD|SFDalpha|SFDbeta|VMA13	ATPase H+ transporting V1 subunit H	protein-coding
MACS_peak_82721	chrX	77165894	77166141	+	88.13	NA	promoter-TSS (NM_000052)	promoter-TSS (NM_000052)	-136	NR_104109	538	Hs.496414	NM_000052	ENSG00000165240	ATP7A	DSMAX|MK|MNK|SMAX3	ATPase copper transporting alpha	protein-coding
MACS_peak_6647	chr1	154299229	154299506	+	76.74	NA	promoter-TSS (NM_020452)	promoter-TSS (NM_020452)	-856	NM_020452	57198	Hs.435700	NM_020452	ENSG00000143515	ATP8B2	ATPID	ATPase phospholipid transporting 8B2	protein-coding
MACS_peak_37005	chr19	1812738	1812882	+	52.4	NA	promoter-TSS (NM_138813)	promoter-TSS (NM_138813)	-535	NR_047593	148229	Hs.306212	NM_138813	ENSG00000130270	ATP8B3	ATPIK	ATPase phospholipid transporting 8B3	protein-coding
MACS_peak_30791	chr17	17942195	17942834	+	309.57	NA	promoter-TSS (NM_145691)	promoter-TSS (NM_145691)	-32	NM_145691	91647	Hs.528889	NM_145691	ENSG00000171953	ATPAF2	ATP12|ATP12p|LP3663|MC5DN1	ATP synthase mitochondrial F1 complex assembly factor 2	protein-coding
MACS_peak_53369	chr3	142297200	142297841	+	312.49	NA	promoter-TSS (NM_001354579)	promoter-TSS (NM_001354579)	55	NM_001184	545	Hs.271791	NM_001184	ENSG00000175054	ATR	FCTCS|FRP1|MEC1|SCKL|SCKL1	ATR serine/threonine kinase	protein-coding
MACS_peak_41698	chr2	27435383	27435520	+	57.46	NA	promoter-TSS (NM_021095)	promoter-TSS (NM_021095)	232	NM_016085	51374	Hs.9527	NM_016085	ENSG00000138085	ATRAID	APR--3|APR-3|APR3|C2orf28|HSPC013|PRO240|p18	all-trans retinoic acid induced differentiation factor	protein-coding
MACS_peak_65230	chr6	16762326	16762502	+	68.63	NA	promoter-TSS (NM_000332)	promoter-TSS (NM_000332)	-693	NM_000332	6310	Hs.434961	NM_000332	ENSG00000124788	ATXN1	ATX1|D6S504E|SCA1	ataxin 1	protein-coding
MACS_peak_28910	chr16	71879793	71879965	+	70.06	NA	promoter-TSS (NM_001137675)	promoter-TSS (NM_001137675)	0	NM_001137675	342371	Hs.743239	NM_001137675	ENSG00000224470	ATXN1L	BOAT|BOAT1	ataxin 1 like	protein-coding
MACS_peak_18688	chr12	112037433	112037588	+	55.45	NA	promoter-TSS (NM_001310123)	promoter-TSS (NM_001310123)	-30	NR_132311	6311	Hs.76253	NM_002973	ENSG00000204842	ATXN2	ATX2|SCA2|TNRC13	ataxin 2	protein-coding
MACS_peak_27826	chr16	28833792	28834149	+	177.8	NA	promoter-TSS (NM_145714)	promoter-TSS (NM_145714)	-399	NM_148416	11273	Hs.460499	NM_007245	ENSG00000168488	ATXN2L	A2D|A2LG|A2LP|A2RP	ataxin 2 like	protein-coding
MACS_peak_71312	chr7	105517613	105517927	+	114.7	NA	promoter-TSS (NM_020725)	promoter-TSS (NM_020725)	-739	NM_152749	222255	Hs.745056	NM_020725	ENSG00000146776	ATXN7L1	ATXN7L4	ataxin 7 like 1	protein-coding
MACS_peak_18209	chr12	74931456	74931695	+	74.41	NA	promoter-TSS (NM_001136262)	promoter-TSS (NM_001136262)	-40	NM_001136262	552889	Hs.744849	NM_001136262	ENSG00000253719	ATXN7L3B	lnc-SCA7	ataxin 7 like 3B	protein-coding
MACS_peak_210	chr1	1311180	1311367	+	64.5	NA	promoter-TSS (NM_001127230)	promoter-TSS (NM_001127230)	-686	NM_001127229	54998	Hs.632515	NM_017900	ENSG00000175756	AURKAIP1	AIP|AKIP|MRP-S38	aurora kinase A interacting protein 1	protein-coding
MACS_peak_30366	chr17	8113594	8114095	+	279.42	NA	promoter-TSS (NM_001313950)	promoter-TSS (NM_001313950)	49	NM_001284526	9212	Hs.442658	NM_004217	ENSG00000178999	AURKB	AIK2|AIM-1|AIM1|ARK-2|ARK2|AurB|IPL1|PPP1R48|STK-1|STK12|STK5|aurkb-sv1|aurkb-sv2	aurora kinase B	protein-coding
MACS_peak_68728	chr7	32535068	32535339	+	110.63	NA	promoter-TSS (NM_001130710)	promoter-TSS (NM_001130710)	102	NM_015060	23080	Hs.128056	NM_015060	ENSG00000105778	AVL9	KIAA0241	AVL9 cell migration associated	protein-coding
MACS_peak_11131	chr10	99447133	99447493	+	256	NA	promoter-TSS (NM_021732)	promoter-TSS (NM_021732)	-315	NM_021732	60370	Hs.23918	NM_021732	ENSG00000119986	AVPI1	PP5395|VIP32|VIT32	arginine vasopressin induced 1	protein-coding
MACS_peak_11130	chr10	99446841	99447080	+	94.46	NA	promoter-TSS (NM_021732)	promoter-TSS (NM_021732)	38	NM_021732	60370	Hs.23918	NM_021732	ENSG00000119986	AVPI1	PP5395|VIP32|VIT32	arginine vasopressin induced 1	protein-coding
MACS_peak_83084	chrX	153167303	153167599	+	85.1	NA	promoter-TSS (NR_027419)	promoter-TSS (NR_027419)	-628	NR_027419	554	Hs.567240	NM_000054	ENSG00000126895	AVPR2	ADHR|DI1|DIR|DIR3|NDI|V2R	arginine vasopressin receptor 2	protein-coding
MACS_peak_83085	chrX	153168057	153168250	+	69.5	NA	promoter-TSS (NR_027419)	promoter-TSS (NR_027419)	74	NR_027419	554	Hs.567240	NM_000054	ENSG00000126895	AVPR2	ADHR|DI1|DIR|DIR3|NDI|V2R	arginine vasopressin receptor 2	protein-coding
MACS_peak_7514	chr1	179334589	179335393	+	271.23	NA	promoter-TSS (NM_144696)	promoter-TSS (NM_144696)	-115	NM_144696	126859	Hs.658505	NM_144696	ENSG00000162779	AXDND1	C1orf125	axonemal dynein light chain domain containing 1	protein-coding
MACS_peak_7513	chr1	179334083	179334352	+	97.56	NA	promoter-TSS (NM_144696)	promoter-TSS (NM_144696)	-889	NM_144696	126859	Hs.658505	NM_144696	ENSG00000162779	AXDND1	C1orf125	axonemal dynein light chain domain containing 1	protein-coding
MACS_peak_25536	chr16	403506	403657	+	50.14	NA	promoter-TSS (NM_003502)	promoter-TSS (NM_003502)	-858	NM_181050	8312	Hs.592082	NM_003502	ENSG00000103126	AXIN1	AXIN|PPP1R49	axin 1	protein-coding
MACS_peak_39893	chr19	41724979	41725211	+	118.98	NA	promoter-TSS (NM_021913)	promoter-TSS (NM_021913)	-33	NM_021913	558	Hs.590970	NM_001699	ENSG00000167601	AXL	ARK|JTK11|Tyro7|UFO	AXL receptor tyrosine kinase	protein-coding
MACS_peak_39892	chr19	41724743	41724972	+	64.79	NA	promoter-TSS (NM_021913)	promoter-TSS (NM_021913)	-271	NM_021913	558	Hs.590970	NM_001699	ENSG00000167601	AXL	ARK|JTK11|Tyro7|UFO	AXL receptor tyrosine kinase	protein-coding
MACS_peak_39896	chr19	41731649	41732368	+	352.44	NA	promoter-TSS (NM_001278599)	promoter-TSS (NM_001278599)	-652	NM_001278599	558	Hs.590970	NM_001699	ENSG00000167601	AXL	ARK|JTK11|Tyro7|UFO	AXL receptor tyrosine kinase	protein-coding
MACS_peak_51303	chr3	28389896	28391012	+	447.6	NA	promoter-TSS (NM_022461)	promoter-TSS (NM_022461)	-139	NM_001134433	64343	Hs.706676	NM_022461	ENSG00000163512	AZI2	AZ2|NAP1|TILP	5-azacytidine induced 2	protein-coding
MACS_peak_73559	chr8	103876036	103876383	+	152.66	NA	promoter-TSS (NR_126338)	promoter-TSS (NR_126338)	182	NM_148174	51582	Hs.459106	NM_015878	ENSG00000155096	AZIN1	AZI|AZI1|AZIA1|OAZI|OAZIN|ODC1L	antizyme inhibitor 1	protein-coding
MACS_peak_3519	chr1	33546414	33546714	+	85.16	NA	promoter-TSS (NM_001293562)	promoter-TSS (NM_001293562)	-190	NM_001350401	113451	Hs.101807	NM_052998	ENSG00000142920	AZIN2	ADC|AZI2|AZIB1|ODC-p|ODC1L|ODCp	antizyme inhibitor 2	protein-coding
MACS_peak_22634	chr15	45003215	45003920	+	309.11	NA	promoter-TSS (NM_004048)	promoter-TSS (NM_004048)	-148	NM_004048	567	Hs.534255	NM_004048	ENSG00000166710	B2M	IMD43	beta-2-microglobulin	protein-coding
MACS_peak_9416	chr1	235667815	235668824	+	333.26	NA	promoter-TSS (NM_152490)	promoter-TSS (NM_152490)	-567	NM_152490	148789	Hs.498143	NM_152490	ENSG00000162885	B3GALNT2	B3GalNAc-T2|MDDGA11	beta-1,3-N-acetylgalactosaminyltransferase 2	protein-coding
MACS_peak_65780	chr6	33244509	33244782	+	96.2	NA	promoter-TSS (NM_003782).4	promoter-TSS (NM_003782).4	-255	NM_003782	8705	Hs.534375	NM_003782	ENSG00000235863	B3GALT4	BETA3GALT4|GALT2|GALT4	beta-1,3-galactosyltransferase 4	protein-coding
MACS_peak_65779	chr6	33244046	33244235	+	77.84	NA	promoter-TSS (NM_003782).4	promoter-TSS (NM_003782).4	-760	NM_003782	8705	Hs.534375	NM_003782	ENSG00000235863	B3GALT4	BETA3GALT4|GALT2|GALT4	beta-1,3-galactosyltransferase 4	protein-coding
MACS_peak_13653	chr11	62390141	62390447	+	86.02	NA	promoter-TSS (NR_109991)	promoter-TSS (NR_109991)	-647	NR_109991	26229	Hs.502759	NM_012200	ENSG00000149541	B3GAT3	GLCATI|JDSCD|glcUAT-I	beta-1,3-glucuronyltransferase 3	protein-coding
MACS_peak_13652	chr11	62388996	62389879	+	530.62	NA	promoter-TSS (NM_001288722)	promoter-TSS (NM_001288722)	21	NM_012200	26229	Hs.502759	NM_012200	ENSG00000149541	B3GAT3	GLCATI|JDSCD|glcUAT-I	beta-1,3-glucuronyltransferase 3	protein-coding
MACS_peak_35910	chr17	81009460	81009709	+	111.95	NA	promoter-TSS (NM_001320742)	promoter-TSS (NM_001320742)	62	NR_135465	146712	Hs.607824	NM_001009905	ENSG00000175711	B3GNTL1	3-Gn-T8|B3GNT8|BGnT-8|beta-1|beta3Gn-T8|beta3GnTL1	UDP-GlcNAc:betaGal beta-1,3-N-acetylglucosaminyltransferase like 1	protein-coding
MACS_peak_18044	chr12	58026897	58027292	+	158.87	NA	promoter-TSS (NM_001276468)	promoter-TSS (NM_001276468)	-72	NM_001276469	2583	Hs.159481	NM_001478	ENSG00000135454	B4GALNT1	GALGT|GALNACT|GalNAc-T|SPG26	beta-1,4-N-acetyl-galactosaminyltransferase 1	protein-coding
MACS_peak_7175	chr1	161148533	161148704	+	55.43	NA	promoter-TSS (NM_001199873)	promoter-TSS (NM_001199873)	-860	NM_001199873	8703	Hs.321231	NM_003779	ENSG00000158850	B4GALT3	beta4Gal-T3	beta-1,4-galactosyltransferase 3	protein-coding
MACS_peak_52884	chr3	118959652	118959803	+	50.14	NA	promoter-TSS (NM_003778)	promoter-TSS (NM_003778)	-2	NM_212543	8702	Hs.13225	NM_003778	ENSG00000121578	B4GALT4	B4Gal-T4|beta4Gal-T4	beta-1,4-galactosyltransferase 4	protein-coding
MACS_peak_46520	chr20	48330578	48330856	+	81.87	NA	promoter-TSS (NM_004776)	promoter-TSS (NM_004776)	-302	NM_004776	9334	Hs.370487	NM_004776	ENSG00000158470	B4GALT5	B4Gal-T5|BETA4-GALT-IV|beta4Gal-T5|beta4GalT-V|gt-V	beta-1,4-galactosyltransferase 5	protein-coding
MACS_peak_64613	chr5	177026465	177026759	+	90.42	NA	promoter-TSS (NM_007255)	promoter-TSS (NM_007255)	-521	NM_007255	11285	Hs.455109	NM_007255	ENSG00000027847	B4GALT7	EDSP1|EDSSLA|EDSSPD1|XGALT1|XGPT|XGPT1	beta-1,4-galactosyltransferase 7	protein-coding
MACS_peak_64614	chr5	177026894	177027132	+	79.65	NA	promoter-TSS (NM_007255)	promoter-TSS (NM_007255)	-120	NM_007255	11285	Hs.455109	NM_007255	ENSG00000027847	B4GALT7	EDSP1|EDSSLA|EDSSPD1|XGALT1|XGPT|XGPT1	beta-1,4-galactosyltransferase 7	protein-coding
MACS_peak_38939	chr19	17378061	17378558	+	268.05	NA	promoter-TSS (NM_014173)	promoter-TSS (NM_014173)	57	NM_014173	29086	Hs.190722	NM_014173	ENSG00000105393	BABAM1	C19orf62|HSPC142|MERIT40|NBA1	BRISC and BRCA1 A complex member 1	protein-coding
MACS_peak_41736	chr2	28114060	28114210	+	50.46	NA	promoter-TSS (NM_001287580)	promoter-TSS (NM_001287580)	-154	NR_028308	100302650	Hs.729719	NR_028308		BABAM2-AS1	BRE-AS1	BABAM2 antisense RNA 1	ncRNA
MACS_peak_48304	chr21	30671647	30671934	+	104.88	NA	promoter-TSS (NM_206866)	promoter-TSS (NM_206866)	94	NM_206866	571	Hs.154276	NM_001186	ENSG00000156273	BACH1	BACH-1|BTBD24	BTB domain and CNC homolog 1	protein-coding
MACS_peak_66531	chr6	91007123	91007440	+	128.59	NA	promoter-TSS (NM_001170794)	promoter-TSS (NM_001170794)	-654	NM_001170794	60468	Hs.269764	NM_021813	ENSG00000112182	BACH2	BTBD25|IMD60	BTB domain and CNC homolog 2	protein-coding
MACS_peak_75780	chr9	33263651	33264122	+	113.42	NA	promoter-TSS (NM_001195536)	promoter-TSS (NM_001195536)	820	NM_004323	573	Hs.377484	NM_004323	ENSG00000107262	BAG1	BAG-1|HAP|RAP46	BCL2 associated athanogene 1	protein-coding
MACS_peak_66307	chr6	57037457	57037670	+	63.23	NA	promoter-TSS (NR_110742)	promoter-TSS (NR_110742)	439	NM_004282	9532	Hs.745046	NM_004282	ENSG00000112208	BAG2	BAG-2|dJ417I1.2	BCL2 associated athanogene 2	protein-coding
MACS_peak_11541	chr10	121410783	121411056	+	138.98	NA	promoter-TSS (NM_004281)	promoter-TSS (NM_004281)	37	NM_004281	9531	Hs.523309	NM_004281	ENSG00000151929	BAG3	BAG-3|BIS|CAIR-1|MFM6	BCL2 associated athanogene 3	protein-coding
MACS_peak_72710	chr8	38034119	38034678	+	204.26	NA	promoter-TSS (NM_001204878)	promoter-TSS (NM_001204878)	25	NM_001204878	9530	Hs.194726	NM_004874	ENSG00000156735	BAG4	BAG-4|SODD	BCL2 associated athanogene 4	protein-coding
MACS_peak_21491	chr14	104028881	104029132	+	77.11	NA	promoter-TSS (NM_001302652)	promoter-TSS (NM_001302652)	145	NM_001015048	9529	Hs.5443	NM_004873	ENSG00000166170	BAG5	BAG-5	BCL2 associated athanogene 5	protein-coding
MACS_peak_21490	chr14	104028590	104028807	+	74.91	NA	promoter-TSS (NM_001302652)	promoter-TSS (NM_001302652)	-41	NM_004873	9529	Hs.5443	NM_004873	ENSG00000166170	BAG5	BAG-5	BCL2 associated athanogene 5	protein-coding
MACS_peak_65655	chr6	31620655	31621106	+	189.49	NA	promoter-TSS (NM_080703).2	promoter-TSS (NM_080703).2	-403	NM_004639	7917	Hs.440900	NM_004639	ENSG00000204463	BAG6	BAG-6|BAT3|D6S52E|G3	BCL2 associated athanogene 6	protein-coding
MACS_peak_65654	chr6	31620293	31620651	+	173.48	NA	promoter-TSS (NM_080703).2	promoter-TSS (NM_080703).2	5	NM_001199698	7917	Hs.440900	NM_004639	ENSG00000204463	BAG6	BAG-6|BAT3|D6S52E|G3	BCL2 associated athanogene 6	protein-coding
MACS_peak_70544	chr7	98030822	98031048	+	85.55	NA	promoter-TSS (NM_018842)	promoter-TSS (NM_018842)	-533	NM_018842	55971	Hs.656063	NM_018842	ENSG00000006453	BAIAP2L1	IRTKS	BAI1 associated protein 2 like 1	protein-coding
MACS_peak_25800	chr16	1385635	1385991	+	142.1	NA	promoter-TSS (NM_001199096)	promoter-TSS (NM_001199096)	-385	NM_001199096	8938	Hs.458427	NM_003933	ENSG00000007516	BAIAP3	BAP3	BAI1 associated protein 3	protein-coding
MACS_peak_14341	chr11	65768654	65768825	+	61.35	NA	promoter-TSS (NM_001143985)	promoter-TSS (NM_001143985)	-811	NM_001143985	8815	Hs.433759	NM_003860	ENSG00000175334	BANF1	BAF|BCRP1|D14S1460|NGPS	barrier to autointegration factor 1	protein-coding
MACS_peak_29293	chr16	87984717	87985022	+	119.06	NA	promoter-TSS (NM_001173540)	promoter-TSS (NM_001173540)	-171	NM_001173540	54971	Hs.461705	NM_017869	ENSG00000172530	BANP	BEND1|SMAR1|SMARBP1	BTG3 associated nuclear protein	protein-coding
MACS_peak_29292	chr16	87984374	87984674	+	109.61	NA	promoter-TSS (NM_001173540)	promoter-TSS (NM_001173540)	-516	NM_001173540	54971	Hs.461705	NM_017869	ENSG00000172530	BANP	BEND1|SMAR1|SMARBP1	BTG3 associated nuclear protein	protein-coding
MACS_peak_59024	chr5	17216214	17217402	+	449.82	NA	promoter-TSS (NM_001271606)	promoter-TSS (NM_001271606)	-124	NM_001271606	10409	Hs.201641	NM_006317	ENSG00000176788	BASP1	CAP-23|CAP23|NAP-22|NAP22	brain abundant membrane attached signal protein 1	protein-coding
MACS_peak_14065	chr11	64757575	64757768	+	61.12	NA	promoter-TSS (NM_001300807)	promoter-TSS (NM_001300807)	78	NM_001300807	116071	Hs.124840	NM_138456	ENSG00000168062	BATF2	SARI	basic leucine zipper ATF-like transcription factor 2	protein-coding
MACS_peak_40757	chr19	49457621	49458127	+	177.64	NA	promoter-TSS (NM_138764)	promoter-TSS (NM_138764)	-243	NM_001291430	581	Hs.624291	NM_004324	ENSG00000087088	BAX	BCL2L4	BCL2 associated X, apoptosis regulator	protein-coding
MACS_peak_40756	chr19	49457443	49457588	+	51.69	NA	promoter-TSS (NM_138764)	promoter-TSS (NM_138764)	-602	NM_001291430	581	Hs.624291	NM_004324	ENSG00000087088	BAX	BCL2L4	BCL2 associated X, apoptosis regulator	protein-coding
MACS_peak_69609	chr7	72936288	72937432	+	477.24	NA	promoter-TSS (NM_032408)	promoter-TSS (NM_032408)	-237	NM_001370402	9031	Hs.743372	NM_023005	ENSG00000009954	BAZ1B	WBSCR10|WBSCR9|WSTF	bromodomain adjacent to zinc finger domain 1B	protein-coding
MACS_peak_17975	chr12	57030556	57030778	+	84.45	NA	promoter-TSS (NM_013449)	promoter-TSS (NM_013449)	-524	NM_013449	11176	Hs.314263	NM_013449	ENSG00000076108	BAZ2A	TIP5|WALp3	bromodomain adjacent to zinc finger domain 2A	protein-coding
MACS_peak_17974	chr12	57030188	57030338	+	55.04	NA	promoter-TSS (NM_013449)	promoter-TSS (NM_013449)	-120	NM_013449	11176	Hs.314263	NM_013449	ENSG00000076108	BAZ2A	TIP5|WALp3	bromodomain adjacent to zinc finger domain 2A	protein-coding
MACS_peak_17971	chr12	57024133	57024357	+	79.24	NA	promoter-TSS (NM_001300905)	promoter-TSS (NM_001300905)	-135	NM_001300905	11176	Hs.314263	NM_013449	ENSG00000076108	BAZ2A	TIP5|WALp3	bromodomain adjacent to zinc finger domain 2A	protein-coding
MACS_peak_43661	chr2	160471915	160472184	+	62.67	NA	promoter-TSS (NM_001329858)	promoter-TSS (NM_001329858)	27	NM_001329858	29994	Hs.470369	NM_013450	ENSG00000123636	BAZ2B	WALp4	bromodomain adjacent to zinc finger domain 2B	protein-coding
MACS_peak_43662	chr2	160472526	160472677	+	50.14	NA	promoter-TSS (NM_001329858)	promoter-TSS (NM_001329858)	458	NM_013450	29994	Hs.470369	NM_013450	ENSG00000123636	BAZ2B	WALp4	bromodomain adjacent to zinc finger domain 2B	protein-coding
MACS_peak_40470	chr19	47734676	47734903	+	83.37	NA	promoter-TSS (NM_014417)	promoter-TSS (NM_014417)	-333	NM_014417	27113	Hs.467020	NM_014417	ENSG00000105327	BBC3	JFY-1|JFY1|PUMA	BCL2 binding component 3	protein-coding
MACS_peak_28981	chr16	75272511	75272685	+	55.94	NA	promoter-TSS (NM_001170721)	promoter-TSS (NM_001170721)	-40	NM_001170721	9564	Hs.479747	NM_014567	ENSG00000050820	BCAR1	CAS|CAS1|CASS1|CRKAS|P130Cas	BCAR1 scaffold protein, Cas family member	protein-coding
MACS_peak_28984	chr16	75299879	75300067	+	64.55	NA	promoter-TSS (NM_001170714)	promoter-TSS (NM_001170714)	-68	NM_001170718	9564	Hs.479747	NM_014567	ENSG00000050820	BCAR1	CAS|CAS1|CASS1|CRKAS|P130Cas	BCAR1 scaffold protein, Cas family member	protein-coding
MACS_peak_5221	chr1	94050573	94050912	+	106.78	NA	promoter-TSS (NM_001308251)	promoter-TSS (NM_001308251)	-23	NM_001308251	8412	Hs.36958	NM_003567	ENSG00000137936	BCAR3	AND-34|NSP2|SH2D3B	BCAR3 adaptor protein, NSP family member	protein-coding
MACS_peak_5243	chr1	94313355	94313876	+	133.68	NA	promoter-TSS (NM_001261408)	promoter-TSS (NM_001261408)	-840	NM_001261408	8412	Hs.36958	NM_003567	ENSG00000137936	BCAR3	AND-34|NSP2|SH2D3B	BCAR3 adaptor protein, NSP family member	protein-coding
MACS_peak_5242	chr1	94312907	94313299	+	114.78	NA	promoter-TSS (NM_001261408)	promoter-TSS (NM_001261408)	-328	NM_001261408	8412	Hs.36958	NM_003567	ENSG00000137936	BCAR3	AND-34|NSP2|SH2D3B	BCAR3 adaptor protein, NSP family member	protein-coding
MACS_peak_5668	chr1	115123960	115124553	+	234.04	NA	promoter-TSS (NM_005872)	promoter-TSS (NM_005872)	-20	NM_005872	10286	Hs.22960	NM_005872	ENSG00000116752	BCAS2	DAM1|SPF27|Snt309	BCAS2 pre-mRNA processing factor	protein-coding
MACS_peak_33834	chr17	58754612	58755078	+	224.08	NA	promoter-TSS (NM_001099432)	promoter-TSS (NM_001099432)	-367	NM_001320470	54828	Hs.655028	NM_017679	ENSG00000141376	BCAS3	GAOB1|MAAB	BCAS3 microtubule associated cell migration factor	protein-coding
MACS_peak_33835	chr17	58755085	58755245	+	52.21	NA	promoter-TSS (NM_001099432)	promoter-TSS (NM_001099432)	-47	NM_001320470	54828	Hs.655028	NM_017679	ENSG00000141376	BCAS3	GAOB1|MAAB	BCAS3 microtubule associated cell migration factor	protein-coding
MACS_peak_46811	chr20	49410951	49411301	+	104.49	NA	promoter-TSS (NM_198799)	promoter-TSS (NM_198799)	-305	NM_198799	55653	Hs.381178	NM_017843	ENSG00000124243	BCAS4	CNOL	breast carcinoma amplified sequence 4	protein-coding
MACS_peak_40731	chr19	49314212	49314547	+	110.73	NA	promoter-TSS (NM_001190)	promoter-TSS (NM_001190)	-93	NM_001284325	587	Hs.512670	NM_001190	ENSG00000105552	BCAT2	BCAM|BCATM|BCT2|PP18	branched chain amino acid transaminase 2	protein-coding
MACS_peak_11641	chr10	127511985	127512240	+	131.68	NA	promoter-TSS (NR_136675)	promoter-TSS (NR_136675)	-3	NM_078469	56647	Hs.370292	NM_016567	ENSG00000107949	BCCIP	TOK-1|TOK1	BRCA2 and CDKN1A interacting protein	protein-coding
MACS_peak_39928	chr19	41903588	41903872	+	105.15	NA	promoter-TSS (NM_001164783)	promoter-TSS (NM_001164783)	7	NM_000709	593	Hs.433307	NM_000709	ENSG00000248098	BCKDHA	BCKDE1A|MSU|MSUD1|OVD1A	branched chain keto acid dehydrogenase E1 subunit alpha	protein-coding
MACS_peak_66431	chr6	80816179	80816515	+	172.01	NA	promoter-TSS (NM_183050)	promoter-TSS (NM_183050)	20	NM_001318975	594	Hs.156414	NM_000056	ENSG00000083123	BCKDHB	BCKDE1B|BCKDH E1-beta|E1B	branched chain keto acid dehydrogenase E1 subunit beta	protein-coding
MACS_peak_28295	chr16	31119576	31119754	+	69.5	NA	promoter-TSS (NM_001122957)	promoter-TSS (NM_001122957)	-42	NM_001271926	10295	Hs.513520	NM_005881	ENSG00000103507	BCKDK	BCKDKD|BDK	branched chain keto acid dehydrogenase kinase	protein-coding
MACS_peak_5053	chr1	85741957	85742552	+	227.14	NA	promoter-TSS (NM_001320715)	promoter-TSS (NM_001320715)	61	NM_001320715	8915	Hs.193516	NM_003921	ENSG00000142867	BCL10	CARMEN|CIPER|CLAP|IMD37|c-E10|mE10	BCL10 immune signaling adaptor	protein-coding
MACS_peak_36582	chr18	60986667	60986878	+	70.27	NA	promoter-TSS (NM_000657)	promoter-TSS (NM_000657)	-159	NM_000633	596	Hs.150749	NM_000633	ENSG00000171791	BCL2	Bcl-2|PPP1R50	BCL2 apoptosis regulator	protein-coding
MACS_peak_45474	chr20	30311078	30311891	+	403.25	NA	promoter-TSS (NM_138578)	promoter-TSS (NM_138578)	282	NM_001317921	598	Hs.516966	NM_001191	ENSG00000171552	BCL2L1	BCL-XL/S|BCL2L|BCLX|Bcl-X|PPP1R52	BCL2 like 1	protein-coding
MACS_peak_45473	chr20	30310396	30311043	+	297.09	NA	promoter-TSS (NM_138578)	promoter-TSS (NM_138578)	-48	NM_001191	598	Hs.516966	NM_001191	ENSG00000171552	BCL2L1	BCL-XL/S|BCL2L|BCLX|Bcl-X|PPP1R52	BCL2 like 1	protein-coding
MACS_peak_45475	chr20	30312602	30312905	+	109.98	NA	promoter-TSS (NM_001317921)	promoter-TSS (NM_001317921)	-987	NM_001322240	598	Hs.516966	NM_001191	ENSG00000171552	BCL2L1	BCL-XL/S|BCL2L|BCLX|Bcl-X|PPP1R52	BCL2 like 1	protein-coding
MACS_peak_43171	chr2	111877971	111878354	+	160.11	NA	promoter-TSS (NM_006538)	promoter-TSS (NM_006538)	-329	NM_138625	10018	Hs.469658	NM_006538	ENSG00000153094	BCL2L11	BAM|BIM|BOD	BCL2 like 11	protein-coding
MACS_peak_43170	chr2	111877731	111877894	+	59.49	NA	promoter-TSS (NM_006538)	promoter-TSS (NM_006538)	-679	NM_138625	10018	Hs.469658	NM_006538	ENSG00000153094	BCL2L11	BAM|BIM|BOD	BCL2 like 11	protein-coding
MACS_peak_48772	chr22	18121319	18121651	+	151.4	NA	promoter-TSS (NM_015367)	promoter-TSS (NM_015367)	-38	NM_015367	23786	Hs.631672	NM_015367	ENSG00000099968	BCL2L13	BCL-RAMBO|Bcl2-L-13|MIL1	BCL2 like 13	protein-coding
MACS_peak_20253	chr14	23775845	23776041	+	53.82	NA	promoter-TSS (NM_001199839)	promoter-TSS (NM_001199839)	-28	NM_004050	599	Hs.410026	NM_004050	ENSG00000129473	BCL2L2	BCL-W|BCL2-L-2|BCLW|PPP1R51	BCL2 like 2	protein-coding
MACS_peak_53936	chr3	187463172	187463667	+	261.27	NA	promoter-TSS (NM_001706)	promoter-TSS (NM_001706)	-163	NM_001706	604	Hs.478588	NM_001706	ENSG00000113916	BCL6	BCL5|BCL6A|LAZ3|ZBTB27|ZNF51	BCL6 transcription repressor	protein-coding
MACS_peak_53937	chr3	187463870	187464067	+	68.23	NA	promoter-TSS (NM_001706)	promoter-TSS (NM_001706)	-712	NM_001706	604	Hs.478588	NM_001706	ENSG00000113916	BCL6	BCL5|BCL6A|LAZ3|ZBTB27|ZNF51	BCL6 transcription repressor	protein-coding
MACS_peak_30123	chr17	6925493	6925640	+	51.42	NA	promoter-TSS (NM_181844)	promoter-TSS (NM_181844)	-803	NM_181844	255877	Hs.22575	NM_181844	ENSG00000161940	BCL6B	BAZF|ZBTB28|ZNF62	BCL6B transcription repressor	protein-coding
MACS_peak_66922	chr6	136610458	136611739	+	663.83	NA	promoter-TSS (NM_001077441)	promoter-TSS (NM_001077441)	-109	NM_001077440	9774	Hs.486542	NM_014739	ENSG00000029363	BCLAF1	BTF|bK211L9.1	BCL2 associated transcription factor 1	protein-coding
MACS_peak_21263	chr14	96670804	96671006	+	54.01	NA	promoter-TSS (NM_000623)	promoter-TSS (NM_000623)	-230	NM_000623	624	Hs.654542	NM_000623	ENSG00000168398	BDKRB2	B2R|BK-2|BK2|BKR2|BRB2	bradykinin receptor B2	protein-coding
MACS_peak_12461	chr11	27722261	27723172	+	283.58	NA	promoter-TSS (NM_001143809)	promoter-TSS (NM_001143809)	-116	NM_001143811	627	Hs.502182	NM_001709	ENSG00000176697	BDNF	ANON2|BULN2	brain derived neurotrophic factor	protein-coding
MACS_peak_61714	chr5	70751286	70751585	+	130	NA	promoter-TSS (NM_018429)	promoter-TSS (NM_018429)	-43	NM_018429	55814	Hs.258272	NM_018429	ENSG00000145734	BDP1	DFNB112|HSA238520|TAF3B1|TFC5|TFIIIB''|TFIIIB150|TFIIIB90|TFNR	B double prime 1, subunit of RNA polymerase III transcription initiation factor IIIB	protein-coding
MACS_peak_32542	chr17	40975883	40976433	+	154.77	NA	promoter-TSS (NR_106839)	promoter-TSS (NR_106839)	142	NM_001313998	8678	Hs.716464	NM_003766	ENSG00000126581	BECN1	ATG6|VPS30|beclin1	beclin 1	protein-coding
MACS_peak_66302	chr6	56820079	56820449	+	165.21	NA	promoter-TSS (NM_001144769)	promoter-TSS (NM_001144769)	359	NM_152731	221336	Hs.582993	NM_152731	ENSG00000151917	BEND6	C6orf65	BEN domain containing 6	protein-coding
MACS_peak_13516	chr11	61717318	61717645	+	72.65	NA	promoter-TSS (NM_004183)	promoter-TSS (NM_004183)	188	NM_001363592	7439	Hs.524910	NM_004183	ENSG00000167995	BEST1	ARB|BEST|BMD|Best1V1Delta2|RP50|TU15B|VMD2	bestrophin 1	protein-coding
MACS_peak_70465	chr7	93633334	93633921	+	198.09	NA	promoter-TSS (NM_001317739)	promoter-TSS (NM_001317739)	40	NM_001317739	10282	Hs.489132	NM_005868	ENSG00000105829	BET1	HBET1	Bet1 golgi vesicular membrane trafficking protein	protein-coding
MACS_peak_27008	chr16	14726430	14727284	+	391.91	NA	promoter-TSS (NM_001330500)	promoter-TSS (NM_001330500)	49	NM_016561	51283	Hs.435556	NM_016561	ENSG00000103429	BFAR	BAR|RNF47	bifunctional apoptosis regulator	protein-coding
MACS_peak_27007	chr16	14726141	14726297	+	63.88	NA	promoter-TSS (NM_001330500)	promoter-TSS (NM_001330500)	-589	NM_001330500	51283	Hs.435556	NM_016561	ENSG00000103429	BFAR	BAR|RNF47	bifunctional apoptosis regulator	protein-coding
MACS_peak_50723	chr3	5020013	5020660	+	335.28	NA	promoter-TSS (NM_003670)	promoter-TSS (NM_003670)	-786	NM_003670	8553	Hs.744856	NM_003670	ENSG00000134107	BHLHE40	BHLHB2|Clast5|DEC1|HLHB2|SHARP-2|SHARP2|STRA13|Stra14	basic helix-loop-helix family member e40	protein-coding
MACS_peak_16765	chr12	26278472	26279114	+	241	NA	promoter-TSS (NM_030762)	promoter-TSS (NM_030762)	-823	NM_030762	79365	Hs.177841	NM_030762	ENSG00000123095	BHLHE41	BHLHB3|DEC2|SHARP1|hDEC2	basic helix-loop-helix family member e41	protein-coding
MACS_peak_76650	chr9	95527360	95527575	+	96.43	NA	promoter-TSS (NM_015250)	promoter-TSS (NM_015250)	-352	NM_001003800	23299	Hs.436939	NM_015250	ENSG00000185963	BICD2	SMALED2|SMALED2A|SMALED2B|bA526D8.1	BICD cargo adaptor 2	protein-coding
MACS_peak_26310	chr16	3087337	3087581	+	73.34	NA	promoter-TSS (NM_001369667)	promoter-TSS (NM_001369667)	-514	NM_001369667	146439	Hs.513285	NM_001103175	ENSG00000162069	BICDL2	BICDR-2|BICDR2|CCDC64B	BICD family like cargo adaptor 2	protein-coding
MACS_peak_66084	chr6	42714368	42714690	+	99.95	NA	promoter-TSS (NM_003192)	promoter-TSS (NM_003192)	-196	NM_001318819	23506	Hs.658033	NM_015349	ENSG00000112624	BICRAL	GLTSCR1L|KIAA0240	BRD4 interacting chromatin remodeling complex associated protein like	protein-coding
MACS_peak_15857	chr11	102217662	102217964	+	106.47	NA	promoter-TSS (NM_001256166)	promoter-TSS (NM_001256166)	-100	NM_001166	329	Hs.696238	NM_001166	ENSG00000110330	BIRC2	API1|HIAP2|Hiap-2|MIHB|RNF48|c-IAP1|cIAP1	baculoviral IAP repeat containing 2	protein-coding
MACS_peak_34970	chr17	76210144	76210427	+	92.17	NA	promoter-TSS (NM_001168)	promoter-TSS (NM_001168)	-49	NM_001012270	332	Hs.744872	NM_001168	ENSG00000089685	BIRC5	API4|EPR-1	baculoviral IAP repeat containing 5	protein-coding
MACS_peak_41840	chr2	32581842	32582163	+	148.56	NA	promoter-TSS (NM_016252)	promoter-TSS (NM_016252)	-94	NM_016252	57448	Hs.150107	NM_016252	ENSG00000115760	BIRC6	APOLLON|BRUCE	baculoviral IAP repeat containing 6	protein-coding
MACS_peak_41839	chr2	32581558	32581834	+	114.28	NA	promoter-TSS (NM_016252)	promoter-TSS (NM_016252)	-400	NM_016252	57448	Hs.150107	NM_016252	ENSG00000115760	BIRC6	APOLLON|BRUCE	baculoviral IAP repeat containing 6	protein-coding
MACS_peak_41845	chr2	32800564	32800741	+	61.53	NA	promoter-TSS (NR_125793)	promoter-TSS (NR_125793)	-767	NR_125793	103752586	Hs.666092	NR_125793	ENSG00000279897	BIRC6-AS2	linc-birc6|megamind	BIRC6 antisense RNA 2	ncRNA
MACS_peak_47752	chr20	61866471	61866632	+	56.92	NA	promoter-TSS (NM_022161)	promoter-TSS (NM_022161)	-706	NM_139317	79444	Hs.256126	NM_022161	ENSG00000101197	BIRC7	KIAP|LIVIN|ML-IAP|MLIAP|RNF50	baculoviral IAP repeat containing 7	protein-coding
MACS_peak_45990	chr20	36156060	36156710	+	293.66	NA	promoter-TSS (NM_001167820)	promoter-TSS (NM_001167820)	-52	NM_001167820	10904	Hs.472651	NM_006698	ENSG00000166619	BLCAP	BC10	BLCAP apoptosis inducing factor	protein-coding
MACS_peak_25054	chr15	91260228	91261078	+	285.68	NA	promoter-TSS (NM_000057)	promoter-TSS (NM_000057)	76	NM_001287247	641	Hs.725208	NM_000057	ENSG00000197299	BLM	BS|MGRISCE1|RECQ2|RECQL2|RECQL3	BLM RecQ like helicase	protein-coding
MACS_peak_11180	chr10	102045965	102046295	+	121.09	NA	promoter-TSS (NM_001001342)	promoter-TSS (NM_001001342)	5	NM_001282438	282991	Hs.34906	NM_173809	ENSG00000196072	BLOC1S2	BLOS2|BORCS2|CEAP|CEAP11	biogenesis of lysosomal organelles complex 1 subunit 2	protein-coding
MACS_peak_11181	chr10	102046647	102046841	+	69.22	NA	promoter-TSS (NM_001001342)	promoter-TSS (NM_001001342)	-275	NM_001282439	282991	Hs.34906	NM_173809	ENSG00000196072	BLOC1S2	BLOS2|BORCS2|CEAP|CEAP11	biogenesis of lysosomal organelles complex 1 subunit 2	protein-coding
MACS_peak_40158	chr19	45681904	45682261	+	128	NA	promoter-TSS (NM_212550)	promoter-TSS (NM_212550)	79	NM_212550	388552	Hs.103902	NM_212550	ENSG00000189114	BLOC1S3	BLOS3|HPS8|RP	biogenesis of lysosomal organelles complex 1 subunit 3	protein-coding
MACS_peak_54467	chr4	6717708	6717918	+	104.5	NA	promoter-TSS (NM_018366)	promoter-TSS (NM_018366)	-88	NM_018366	55330	Hs.7570	NM_018366	ENSG00000186222	BLOC1S4	BCAS4L|BLOS4|CNO	biogenesis of lysosomal organelles complex 1 subunit 4	protein-coding
MACS_peak_65130	chr6	8064532	8064865	+	143.77	NA	promoter-TSS (NR_037616)	promoter-TSS (NR_037616)	-51	NM_001199322	63915	Hs.719272	NM_201280	ENSG00000188428	BLOC1S5	BLOS5|MU|MUTED	biogenesis of lysosomal organelles complex 1 subunit 5	protein-coding
MACS_peak_22673	chr15	45879139	45879956	+	248.1	NA	promoter-TSS (NM_001311256)	promoter-TSS (NM_001311256)	-211	NR_132350	26258	Hs.7037	NM_012388	ENSG00000104164	BLOC1S6	BLOS6|HPS9|PA|PALLID|PLDN	biogenesis of lysosomal organelles complex 1 subunit 6	protein-coding
MACS_peak_68898	chr7	43797483	43797656	+	58.49	NA	promoter-TSS (NM_000712)	promoter-TSS (NM_000712)	-703	NM_001253823	644	Hs.488143	NM_000712	ENSG00000106605	BLVRA	BLVR|BVR|BVRA	biliverdin reductase A	protein-coding
MACS_peak_27141	chr16	15595901	15596391	+	97.11	NA	promoter-TSS (NM_001142469)	promoter-TSS (NM_001142469)	23	NM_001142469	89927	Hs.401798	NM_033201	ENSG00000166780	BMERB1	C16orf45|MINP	bMERB domain containing 1	protein-coding
MACS_peak_72397	chr8	22021991	22022223	+	57.89	NA	promoter-TSS (NR_033403)	promoter-TSS (NR_033403)	-778	NM_006129	649	Hs.1274	NM_001199	ENSG00000168487	BMP1	OI13|PCOLC|PCP|PCP2|TLD	bone morphogenetic protein 1	protein-coding
MACS_peak_55110	chr4	79696606	79697029	+	187.49	NA	promoter-TSS (NM_017593)	promoter-TSS (NM_017593)	-687	NM_017593	55589	Hs.146551	NM_017593	ENSG00000138756	BMP2K	BIKE|HRIHFB2017	BMP2 inducible kinase	protein-coding
MACS_peak_20600	chr14	54421515	54421638	+	52.87	NA	promoter-TSS (NM_130851)	promoter-TSS (NM_130851)	192	NM_001347917	652	Hs.68879	NM_001202	ENSG00000125378	BMP4	BMP2B|BMP2B1|MCOPS6|OFC11|ZYME	bone morphogenetic protein 4	protein-coding
MACS_peak_20601	chr14	54422344	54422742	+	121.12	NA	promoter-TSS (NM_001347916)	promoter-TSS (NM_001347916)	-775	NM_001347916	652	Hs.68879	NM_001202	ENSG00000125378	BMP4	BMP2B|BMP2B1|MCOPS6|OFC11|ZYME	bone morphogenetic protein 4	protein-coding
MACS_peak_68762	chr7	33944095	33944737	+	173.52	NA	promoter-TSS (NM_133468)	promoter-TSS (NM_133468)	-111	NM_133468	168667	Hs.660998	NM_133468	ENSG00000164619	BMPER	CRIM3|CV-2|CV2	BMP binding endothelial regulator	protein-coding
MACS_peak_10917	chr10	88515663	88515960	+	101.48	NA	promoter-TSS (NM_004329)	promoter-TSS (NM_004329)	-585	NM_004329	657	Hs.524477	NM_004329	ENSG00000107779	BMPR1A	10q23del|ACVRLK3|ALK3|CD292|SKR5	bone morphogenetic protein receptor type 1A	protein-coding
MACS_peak_10916	chr10	88515458	88515656	+	67.9	NA	promoter-TSS (NM_004329)	promoter-TSS (NM_004329)	-839	NM_004329	657	Hs.524477	NM_004329	ENSG00000107779	BMPR1A	10q23del|ACVRLK3|ALK3|CD292|SKR5	bone morphogenetic protein receptor type 1A	protein-coding
MACS_peak_44291	chr2	203240275	203240618	+	124.8	NA	promoter-TSS (NM_001204)	promoter-TSS (NM_001204)	-604	NM_001204	659	Hs.471119	NM_001204	ENSG00000204217	BMPR2	BMPR-II|BMPR3|BMR2|BRK-3|POVD1|PPH1|T-ALK	bone morphogenetic protein receptor type 2	protein-coding
MACS_peak_44292	chr2	203240627	203240892	+	107.59	NA	promoter-TSS (NM_001204)	promoter-TSS (NM_001204)	-291	NM_001204	659	Hs.471119	NM_001204	ENSG00000204217	BMPR2	BMPR-II|BMPR3|BMR2|BRK-3|POVD1|PPH1|T-ALK	bone morphogenetic protein receptor type 2	protein-coding
MACS_peak_10282	chr10	43277981	43278480	+	140.91	NA	promoter-TSS (NM_014753)	promoter-TSS (NM_014753)	-13	NM_014753	9790	Hs.10848	NM_014753	ENSG00000165733	BMS1	ACC|BMS1L	BMS1 ribosome biogenesis factor	protein-coding
MACS_peak_10718	chr10	75489947	75490593	+	308.47	NA	promoter-TSS (NR_026592)	promoter-TSS (NR_026592)	2	NR_026592	729096	Hs.709171	NR_026592	ENSG00000271816	BMS1P4	BMS1LP4	BMS1 pseudogene 4	pseudo
MACS_peak_71381	chr7	112579753	112580291	+	219.91	NA	promoter-TSS (NM_152556)	promoter-TSS (NM_152556)	-92	NM_152556	154743	Hs.489734	NM_152556	ENSG00000164603	BMT2	C7orf60|SAMTOR	base methyltransferase of 25S rRNA 2 homolog	protein-coding
MACS_peak_24678	chr15	83952726	83952914	+	63.21	NA	promoter-TSS (NM_001301206)	promoter-TSS (NM_001301206)	596	NM_001717	646	Hs.459153	NM_001717	ENSG00000169594	BNC1	BNC|BSN1|HsT19447	basonuclin 1	protein-coding
MACS_peak_75573	chr9	16871195	16871494	+	87.82	NA	promoter-TSS (NM_017637)	promoter-TSS (NM_017637)	-676	NM_017637	54796	Hs.656581	NM_017637	ENSG00000173068	BNC2	BSN2	basonuclin 2	protein-coding
MACS_peak_22980	chr15	59981542	59981836	+	120.63	NA	promoter-TSS (NM_004330)	promoter-TSS (NM_004330)	-170	NM_004330	663	Hs.592515	NM_004330	ENSG00000140299	BNIP2	BNIP-2|NIP2	BCL2 interacting protein 2	protein-coding
MACS_peak_22981	chr15	59982046	59982326	+	103.96	NA	promoter-TSS (NM_004330)	promoter-TSS (NM_004330)	-667	NM_004330	663	Hs.592515	NM_004330	ENSG00000140299	BNIP2	BNIP-2|NIP2	BCL2 interacting protein 2	protein-coding
MACS_peak_22979	chr15	59980881	59981465	+	248.57	NA	promoter-TSS (NM_001320675)	promoter-TSS (NM_001320675)	-48	NM_001320675	663	Hs.592515	NM_004330	ENSG00000140299	BNIP2	BNIP-2|NIP2	BCL2 interacting protein 2	protein-coding
MACS_peak_72512	chr8	26240427	26240848	+	188.29	NA	promoter-TSS (NR_144550)	promoter-TSS (NR_144550)	67	NM_004331	665	Hs.131226	NM_004331	ENSG00000104765	BNIP3L	BNIP3a|NIX	BCL2 interacting protein 3 like	protein-coding
MACS_peak_64286	chr5	173043607	173043917	+	91.13	NA	promoter-TSS (NM_138369)	promoter-TSS (NM_138369)	-96	NM_001159651	91272	Hs.425091	NM_138369	ENSG00000145919	BOD1	FAM44B	biorientation of chromosomes in cell division 1	protein-coding
MACS_peak_6268	chr1	149871001	149871296	+	155.59	NA	promoter-TSS (NM_016074)	promoter-TSS (NM_016074)	27	NM_016074	51027	Hs.13880	NM_016074	ENSG00000178096	BOLA1	CGI-143	bolA family member 1	protein-coding
MACS_peak_28105	chr16	30204114	30205939	+	900.31	NA	promoter-TSS (NM_178044)	promoter-TSS (NM_178044)	-39	NM_001320607	654483	Hs.444600	NM_001039182	ENSG00000169627	BOLA2B	BOLA2	bolA family member 2B	protein-coding
MACS_peak_27924	chr16	29465059	29466348	+	844.21	NA	promoter-TSS (NM_001039182)	promoter-TSS (NM_001039182)	-58	NM_001039182	654483	Hs.444600	NM_001039182	ENSG00000169627	BOLA2B	BOLA2	bolA family member 2B	protein-coding
MACS_peak_19622	chr13	73301469	73302215	+	360.88	NA	promoter-TSS (NM_001286747)	promoter-TSS (NM_001286747)	-45	NM_001286747	79866	Hs.643464	NM_024808	ENSG00000136122	BORA	C13orf34	BORA aurora kinase A activator	protein-coding
MACS_peak_16554	chr12	12509903	12510256	+	147.83	NA	promoter-TSS (NR_024061)	promoter-TSS (NR_024061)	67	NM_001300742	118426	Hs.504805	NM_058169	ENSG00000165714	BORCS5	LOH12CR1|LOH1CR12	BLOC-1 related complex subunit 5	protein-coding
MACS_peak_30360	chr17	8093073	8093853	+	261.81	NA	promoter-TSS (NM_017622)	promoter-TSS (NM_017622)	35	NM_017622	54785	Hs.129563	NM_017622	ENSG00000196544	BORCS6	C17orf59|PRO2472	BLOC-1 related complex subunit 6	protein-coding
MACS_peak_11310	chr10	104613822	104613975	+	55.8	NA	promoter-TSS (NR_037644)	promoter-TSS (NR_037644)	-69	NR_037644	100528007	Hs.720370	NR_037644		BORCS7-ASMT	C10orf32-AS3MT|C10orf32-ASMT	BORCS7-ASMT readthrough (NMD candidate)	ncRNA
MACS_peak_11309	chr10	104612935	104613085	+	50.46	NA	promoter-TSS (NR_037644)	promoter-TSS (NR_037644)	-957	NR_037644	100528007	Hs.720370	NR_037644		BORCS7-ASMT	C10orf32-AS3MT|C10orf32-ASMT	BORCS7-ASMT readthrough (NMD candidate)	ncRNA
MACS_peak_39213	chr19	19302646	19303310	+	338.22	NA	promoter-TSS (NM_134440)	promoter-TSS (NM_134440)	-17	NM_001145784	729991	Hs.153629	NM_001145783	ENSG00000254901	BORCS8	MEF2BNB	BLOC-1 related complex subunit 8	protein-coding
MACS_peak_71776	chr7	134331451	134331764	+	107.52	NA	promoter-TSS (NM_199186)	promoter-TSS (NM_199186)	2	NM_001724	669	Hs.198365	NM_001724	ENSG00000172331	BPGM	DPGM|ECYT8	bisphosphoglycerate mutase	protein-coding
MACS_peak_8683	chr1	220263061	220263358	+	119.25	NA	promoter-TSS (NM_006085)	promoter-TSS (NM_006085)	-14	NM_001286151	10380	Hs.406134	NM_006085	ENSG00000162813	BPNT1	HEL20|PIP	3'(2'), 5'-bisphosphate nucleotidase 1	protein-coding
MACS_peak_8684	chr1	220263667	220263959	+	63.75	NA	promoter-TSS (NM_006085)	promoter-TSS (NM_006085)	-618	NM_001286151	10380	Hs.406134	NM_006085	ENSG00000162813	BPNT1	HEL20|PIP	3'(2'), 5'-bisphosphate nucleotidase 1	protein-coding
MACS_peak_34222	chr17	65821346	65821685	+	185.96	NA	promoter-TSS (NM_004459)	promoter-TSS (NM_004459)	-104	NM_182641	2186	Hs.444200	NM_004459	ENSG00000171634	BPTF	FAC1|FALZ|NEDDFL|NURF301	bromodomain PHD finger transcription factor	protein-coding
MACS_peak_34221	chr17	65820910	65821179	+	108.99	NA	promoter-TSS (NM_004459)	promoter-TSS (NM_004459)	-575	NM_182641	2186	Hs.444200	NM_004459	ENSG00000171634	BPTF	FAC1|FALZ|NEDDFL|NURF301	bromodomain PHD finger transcription factor	protein-coding
MACS_peak_71898	chr7	140624843	140625005	+	53.2	NA	promoter-TSS (NM_004333)	promoter-TSS (NM_004333)	-195	NM_004333	673	Hs.324250	NM_004333	ENSG00000157764	BRAF	B-RAF1|B-raf|BRAF1|NS7|RAFB1	B-Raf proto-oncogene, serine/threonine kinase	protein-coding
MACS_peak_67754	chr7	2594993	2595349	+	141.98	NA	promoter-TSS (NM_001350627)	promoter-TSS (NM_001350627)	-13	NR_146879	221927	Hs.520623	NM_152743	ENSG00000106009	BRAT1	BAAT1|C7orf27|NEDCAS|RMFSL	BRCA1 associated ATM activator 1	protein-coding
MACS_peak_67755	chr7	2595624	2595826	+	64.94	NA	promoter-TSS (NM_001350627)	promoter-TSS (NM_001350627)	-567	NR_146879	221927	Hs.520623	NM_152743	ENSG00000106009	BRAT1	BAAT1|C7orf27|NEDCAS|RMFSL	BRCA1 associated ATM activator 1	protein-coding
MACS_peak_32575	chr17	41276741	41277627	+	403.63	NA	promoter-TSS (NR_003108)	promoter-TSS (NR_003108)	197	NM_007299	672	Hs.194143	NM_007294	ENSG00000012048	BRCA1	BRCAI|BRCC1|BROVCA1|FANCS|IRIS|PNCA4|PPP1R53|PSCP|RNF53	BRCA1 DNA repair associated	protein-coding
MACS_peak_19421	chr13	32889502	32889718	+	81.99	NA	promoter-TSS (NM_000059)	promoter-TSS (NM_000059)	-7	NM_000059	675	Hs.34012	NM_000059	ENSG00000139618	BRCA2	BRCC2|BROVCA2|FACD|FAD|FAD1|FANCD|FANCD1|GLM3|PNCA2|XRCC11	BRCA2 DNA repair associated	protein-coding
MACS_peak_50485	chr22	50218043	50218190	+	64.87	NA	promoter-TSS (NM_001349941)	promoter-TSS (NM_001349941)	-137	NM_001349941	23774	Hs.127950	NM_014577	ENSG00000100425	BRD1	BRL|BRPF1|BRPF2	bromodomain containing 1	protein-coding
MACS_peak_50486	chr22	50218441	50218641	+	54.57	NA	promoter-TSS (NM_001349941)	promoter-TSS (NM_001349941)	-562	NM_001349941	23774	Hs.127950	NM_014577	ENSG00000100425	BRD1	BRL|BRPF1|BRPF2	bromodomain containing 1	protein-coding
MACS_peak_65757	chr6	32936155	32936480	+	139.72	NA	promoter-TSS (NM_005104).6	promoter-TSS (NM_005104).6	-54	NM_005104	6046	Hs.75243	NM_005104	ENSG00000204256	BRD2	BRD2-IT1|D6S113E|FSH|FSRG1|NAT|O27.1.1|RING3|RNF3	bromodomain containing 2	protein-coding
MACS_peak_65760	chr6	32937867	32938273	+	158.51	NA	promoter-TSS (NM_001291986).5	promoter-TSS (NM_001291986).5	-637	NM_001291986	6046	Hs.75243	NM_005104	ENSG00000204256	BRD2	BRD2-IT1|D6S113E|FSH|FSRG1|NAT|O27.1.1|RING3|RNF3	bromodomain containing 2	protein-coding
MACS_peak_65761	chr6	32939322	32940524	+	677.27	NA	promoter-TSS (NM_001199456).6	promoter-TSS (NM_001199456).6	551	NM_001199455	6046	Hs.75243	NM_005104	ENSG00000204256	BRD2	BRD2-IT1|D6S113E|FSH|FSRG1|NAT|O27.1.1|RING3|RNF3	bromodomain containing 2	protein-coding
MACS_peak_80309	chr9	136933846	136934385	+	197.97	NA	promoter-TSS (NM_007371)	promoter-TSS (NM_007371)	-967	NM_007371	8019	Hs.522472	NM_007371	ENSG00000169925	BRD3	ORFX|RING3L	bromodomain containing 3	protein-coding
MACS_peak_80287	chr9	136890375	136890608	+	106.55	NA	promoter-TSS (NM_001355256)	promoter-TSS (NM_001355256)	-107	NR_149319	266655	Hs.654869	NM_001355256	ENSG00000235106	BRD3OS	LINC00094|LP2477|NCRNA00094	BRD3 opposite strand	protein-coding
MACS_peak_38792	chr19	15391875	15392155	+	57.88	NA	promoter-TSS (NM_014299)	promoter-TSS (NM_014299)	-753	NM_014299	23476	Hs.187763	NM_014299	ENSG00000141867	BRD4	CAP|HUNK1|HUNKI|MCAP	bromodomain containing 4	protein-coding
MACS_peak_63044	chr5	137514031	137514430	+	125.33	NA	promoter-TSS (NM_001300966)	promoter-TSS (NM_001300966)	89	NM_001300961	10902	Hs.519337	NM_006696	ENSG00000112983	BRD8	SMAP|SMAP2|p120	bromodomain containing 8	protein-coding
MACS_peak_56564	chr5	891821	893244	+	573.51	NA	promoter-TSS (NM_001166260)	promoter-TSS (NM_001166260)	105	NR_134296	65980	Hs.449278	NM_023924	ENSG00000028310	BRD9	LAVS3040|PRO9856	bromodomain containing 9	protein-coding
MACS_peak_5165	chr1	92417002	92417224	+	53.96	NA	promoter-TSS (NM_001726)	promoter-TSS (NM_001726)	-596	NM_001726	676	Hs.482520	NM_001726	ENSG00000137948	BRDT	BRD6|CT9|SPGF21	bromodomain testis associated	protein-coding
MACS_peak_72689	chr8	37707157	37707652	+	242.18	NA	promoter-TSS (NM_018310)	promoter-TSS (NM_018310)	-25	NM_018310	55290	Hs.709301	NM_018310	ENSG00000104221	BRF2	BRFU|TFIIIB50	BRF2 RNA polymerase III transcription initiation factor subunit	protein-coding
MACS_peak_26063	chr16	2261456	2261604	+	51.1	NA	promoter-TSS (NM_182563)	promoter-TSS (NM_182563)	-461	NM_182563	283870	Hs.647399	NM_182563	ENSG00000182685	BRICD5	C16orf79	BRICHOS domain containing 5	protein-coding
MACS_peak_50920	chr3	10157018	10157421	+	139.71	NA	promoter-TSS (NM_018462)	promoter-TSS (NM_018462)	-140	NM_018462	55845	Hs.649307	NM_018462	ENSG00000254999	BRK1	C3orf10|HSPC300|MDS027|hHBrk1	BRICK1 subunit of SCAR/WAVE actin nucleating complex	protein-coding
MACS_peak_8731	chr1	222886541	222887064	+	197.36	NA	promoter-TSS (NM_022831)	promoter-TSS (NM_022831)	139	NM_001288580	148362	Hs.534965	NM_144695	ENSG00000162819	BROX	C1orf58	BRO1 domain and CAAX motif containing	protein-coding
MACS_peak_8730	chr1	222886004	222886215	+	77.66	NA	promoter-TSS (NM_001288580)	promoter-TSS (NM_001288580)	203	NM_144695	148362	Hs.534965	NM_144695	ENSG00000162819	BROX	C1orf58	BRO1 domain and CAAX motif containing	protein-coding
MACS_peak_50810	chr3	9772979	9773565	+	279.82	NA	promoter-TSS (NM_004634)	promoter-TSS (NM_004634)	-141	NM_001319049	7862	Hs.1004	NM_004634	ENSG00000156983	BRPF1	BR140|IDDDFP	bromodomain and PHD finger containing 1	protein-coding
MACS_peak_50809	chr3	9772422	9772720	+	58.9	NA	promoter-TSS (NM_004634)	promoter-TSS (NM_004634)	-842	NM_001319049	7862	Hs.1004	NM_004634	ENSG00000156983	BRPF1	BR140|IDDDFP	bromodomain and PHD finger containing 1	protein-coding
MACS_peak_83015	chrX	135569338	135569518	+	54.12	NA	promoter-TSS (NM_001727)	promoter-TSS (NM_001727)	-678	NM_001727	680	Hs.121484	NM_001727	ENSG00000102239	BRS3	BB3|BB3R|BBR3	bombesin receptor subtype 3	protein-coding
MACS_peak_48494	chr21	40685445	40685887	+	180.1	NA	promoter-TSS (NM_033656)	promoter-TSS (NM_033656)	46	NM_001007246	54014	Hs.627139	NM_018963	ENSG00000185658	BRWD1	C21orf107|DCAF19|N143|WDR9|WRD9	bromodomain and WD repeat domain containing 1	protein-coding
MACS_peak_82726	chrX	80065601	80065771	+	57.2	NA	promoter-TSS (NM_153252)	promoter-TSS (NM_153252)	-310	NM_153252	254065	Hs.147027	NM_153252	ENSG00000165288	BRWD3	BRODL|MRX93	bromodomain and WD repeat domain containing 3	protein-coding
MACS_peak_13680	chr11	62477116	62477425	+	92.26	NA	promoter-TSS (NR_037948)	promoter-TSS (NR_037948)	-179	NR_037948	26580	Hs.533709	NM_032667	ENSG00000168000	BSCL2	GNG3LG|HMN5|PELD|SPG17	BSCL2 lipid droplet biogenesis associated, seipin	protein-coding
MACS_peak_36715	chr19	571079	571422	+	118.96	NA	promoter-TSS (NM_198590)	promoter-TSS (NM_198590)	-33	NM_198591	682	Hs.501293	NM_001728	ENSG00000172270	BSG	5F7|CD147|EMMPRIN|EMPRIN|OK|SLC7A11|TCSF	basigin (Ok blood group)	protein-coding
MACS_peak_36716	chr19	572190	572458	+	72.26	NA	promoter-TSS (NM_001322243)	promoter-TSS (NM_001322243)	-272	NM_001322243	682	Hs.501293	NM_001728	ENSG00000172270	BSG	5F7|CD147|EMMPRIN|EMPRIN|OK|SLC7A11|TCSF	basigin (Ok blood group)	protein-coding
MACS_peak_38970	chr19	17515912	17516243	+	97.18	NA	promoter-TSS (NR_130765)	promoter-TSS (NR_130765)	362	NM_004335	684	Hs.118110	NM_004335	ENSG00000130303	BST2	CD317|TETHERIN	bone marrow stromal cell antigen 2	protein-coding
MACS_peak_11003	chr10	93683403	93683578	+	76	NA	promoter-TSS (NM_003972)	promoter-TSS (NM_003972)	-37	NM_003972	9044	Hs.500526	NM_003972	ENSG00000095564	BTAF1	MOT1|TAF(II)170|TAF172|TAFII170	B-TFIID TATA-box binding protein associated factor 1	protein-coding
MACS_peak_61784	chr5	72793807	72794699	+	487.3	NA	promoter-TSS (NM_001207)	promoter-TSS (NM_001207)	3	NM_001037637	689	Hs.591768	NM_001207	ENSG00000145741	BTF3	BETA-NAC|BTF3a|BTF3b|NACB	basic transcription factor 3	protein-coding
MACS_peak_18310	chr12	92539513	92539868	+	149.54	NA	promoter-TSS (NR_135037)	promoter-TSS (NR_135037)	-68	NM_001731	694	Hs.255935	NM_001731	ENSG00000133639	BTG1	APRO2	BTG anti-proliferation factor 1	protein-coding
MACS_peak_8164	chr1	203274536	203274937	+	136.48	NA	promoter-TSS (NR_034150)	promoter-TSS (NR_034150)	89	NM_006763	7832	Hs.519162	NM_006763	ENSG00000159388	BTG2	APRO1|PC3|TIS21	BTG anti-proliferation factor 2	protein-coding
MACS_peak_11229	chr10	103113594	103113910	+	150.62	NA	promoter-TSS (NM_001256856)	promoter-TSS (NM_001256856)	-38	NM_001256856	8945	Hs.643802	NM_003939	ENSG00000166167	BTRC	BETA-TRCP|FBW1A|FBXW1|FBXW1A|FWD1|bTrCP|bTrCP1|betaTrCP	beta-transducin repeat containing E3 ubiquitin protein ligase	protein-coding
MACS_peak_43165	chr2	111435465	111435847	+	139.62	NA	promoter-TSS (NM_001278617)	promoter-TSS (NM_001278617)	-16	NM_004336	699	Hs.469649	NM_004336	ENSG00000169679	BUB1	BUB1A|BUB1L|hBUB1	BUB1 mitotic checkpoint serine/threonine kinase	protein-coding
MACS_peak_22183	chr15	40452899	40453721	+	340.86	NA	promoter-TSS (NM_001211)	promoter-TSS (NM_001211)	100	NM_001211	701	Hs.513645	NM_001211	ENSG00000156970	BUB1B	BUB1beta|BUBR1|Bub1A|MAD3L|MVA1|SSK1|hBUBR1	BUB1 mitotic checkpoint serine/threonine kinase B	protein-coding
MACS_peak_11585	chr10	124913458	124913889	+	184.33	NA	promoter-TSS (NM_004725)	promoter-TSS (NM_004725)	-87	NM_001007793	9184	Hs.418533	NM_004725	ENSG00000154473	BUB3	BUB3L|hBUB3	BUB3 mitotic checkpoint protein	protein-coding
MACS_peak_69650	chr7	73097874	73098087	+	64.55	NA	promoter-TSS (NR_045512)	promoter-TSS (NR_045512)	53	NR_037776	114049	Hs.647063	NM_017528	ENSG00000071462	BUD23	HASJ4442|HUSSY-3|MERM1|PP3381|WBMT|WBSCR22	BUD23 rRNA methyltransferase and ribosome maturation factor	protein-coding
MACS_peak_69651	chr7	73098152	73098586	+	198.14	NA	promoter-TSS (NM_032317)	promoter-TSS (NM_032317)	442	NR_037776	114049	Hs.647063	NM_017528	ENSG00000071462	BUD23	HASJ4442|HUSSY-3|MERM1|PP3381|WBMT|WBSCR22	BUD23 rRNA methyltransferase and ribosome maturation factor	protein-coding
MACS_peak_70597	chr7	99005956	99006880	+	643.24	NA	promoter-TSS (NM_001370407)	promoter-TSS (NM_001370407)	-174	NM_003910	8896	Hs.380233	NM_003910	ENSG00000106245	BUD31	Cwc14|EDG-2|EDG2|G10|YCR063W|fSAP17	BUD31 homolog	protein-coding
MACS_peak_66045	chr6	41889521	41889736	+	67.41	NA	promoter-TSS (NM_001305455)	promoter-TSS (NM_001305455)	391	NM_004053	705	Hs.106880	NM_004053	ENSG00000112578	BYSL	BYSTIN|Enp1	bystin like	protein-coding
MACS_peak_44206	chr2	201676946	201677558	+	286.31	NA	promoter-TSS (NR_110275)	promoter-TSS (NR_110275)	143	NM_001207068	9689	Hs.355983	NM_014670	ENSG00000082153	BZW1	BZAP45|Nbla10236	basic leucine zipper and W2 domains 1	protein-coding
MACS_peak_44204	chr2	201675865	201676198	+	109.05	NA	promoter-TSS (NM_014670)	promoter-TSS (NM_014670)	-238	NM_014670	9689	Hs.355983	NM_014670	ENSG00000082153	BZW1	BZAP45|Nbla10236	basic leucine zipper and W2 domains 1	protein-coding
MACS_peak_44205	chr2	201676273	201676917	+	268.23	NA	promoter-TSS (NM_001321688)	promoter-TSS (NM_001321688)	-38	NM_001321688	9689	Hs.355983	NM_014670	ENSG00000082153	BZW1	BZAP45|Nbla10236	basic leucine zipper and W2 domains 1	protein-coding
MACS_peak_68361	chr7	16685610	16685963	+	154.15	NA	promoter-TSS (NM_001159767)	promoter-TSS (NM_001159767)	-20	NM_001362718	28969	Hs.487635	NM_014038	ENSG00000136261	BZW2	HSPC028|MST017|MSTP017	basic leucine zipper and W2 domains 2	protein-coding
MACS_peak_11664	chr10	131908974	131909126	+	63.35	NA	promoter-TSS (NR_034125)	promoter-TSS (NR_034125)	31	NR_034125	387723	Hs.127394	NM_001355042	ENSG00000237489	C10orf143	LINC00959	chromosome 10 open reading frame 143	protein-coding
MACS_peak_11665	chr10	131909129	131909302	+	62.85	NA	promoter-TSS (NR_034125)	promoter-TSS (NR_034125)	-121	NM_001355042	387723	Hs.127394	NM_001355042	ENSG00000237489	C10orf143	LINC00959	chromosome 10 open reading frame 143	protein-coding
MACS_peak_14876	chr11	68039285	68039908	+	301.53	NA	promoter-TSS (NM_022338)	promoter-TSS (NM_022338)	-155	NM_022338	53838	Hs.303025	NM_022338	ENSG00000171067	C11orf24	DM4E3	chromosome 11 open reading frame 24	protein-coding
MACS_peak_15746	chr11	93473990	93475492	+	595.38	NA	promoter-TSS (NM_001351992)	promoter-TSS (NM_001351992)	-19	NM_001286070	28970	Hs.8360	NM_014039	ENSG00000182919	C11orf54	PTD012|PTOD012	chromosome 11 open reading frame 54	protein-coding
MACS_peak_12298	chr11	16760368	16760842	+	110.41	NA	promoter-TSS (NM_001367872)	promoter-TSS (NM_001367872)	411	NM_014267	10944	Hs.368226	NM_014267	ENSG00000110696	C11orf58	IMAGE145052|SMAP	chromosome 11 open reading frame 58	protein-coding
MACS_peak_12297	chr11	16760099	16760360	+	107.33	NA	promoter-TSS (NM_001367872)	promoter-TSS (NM_001367872)	35	NM_014267	10944	Hs.368226	NM_014267	ENSG00000110696	C11orf58	IMAGE145052|SMAP	chromosome 11 open reading frame 58	protein-coding
MACS_peak_14324	chr11	65685998	65686364	+	137.08	NA	promoter-TSS (NM_006442)	promoter-TSS (NM_006442)	352	NM_031450	83638	Hs.433573	NM_031450	ENSG00000175573	C11orf68	BLES03|P5326	chromosome 11 open reading frame 68	protein-coding
MACS_peak_14496	chr11	66511552	66511824	+	72.73	NA	promoter-TSS (NM_001302084)	promoter-TSS (NM_001302084)	-519	NM_024650	79703	Hs.292088	NM_024650	ENSG00000173715	C11orf80	HYDM4|TOP6BL|TOPOVIBL	chromosome 11 open reading frame 80	protein-coding
MACS_peak_14497	chr11	66511834	66512023	+	58.31	NA	promoter-TSS (NM_001302084)	promoter-TSS (NM_001302084)	-279	NM_024650	79703	Hs.292088	NM_024650	ENSG00000173715	C11orf80	HYDM4|TOP6BL|TOPOVIBL	chromosome 11 open reading frame 80	protein-coding
MACS_peak_13663	chr11	62432311	62433107	+	374.35	NA	promoter-TSS (NR_104414)	promoter-TSS (NR_104414)	-21	NM_001286086	102288414	Hs.9061	NM_001286086	ENSG00000278615	C11orf98	C11orf48	chromosome 11 open reading frame 98	protein-coding
MACS_peak_17691	chr12	53693108	53693950	+	264.92	NA	promoter-TSS (NM_021640)	promoter-TSS (NM_021640)	50	NM_021640	60314	Hs.655988	NM_021640	ENSG00000139637	C12orf10	Gamm1|MST024|MSTP024|MYG|MYG1	chromosome 12 open reading frame 10	protein-coding
MACS_peak_17690	chr12	53692622	53692820	+	71.79	NA	promoter-TSS (NM_021640)	promoter-TSS (NM_021640)	-758	NM_021640	60314	Hs.655988	NM_021640	ENSG00000139637	C12orf10	Gamm1|MST024|MSTP024|MYG|MYG1	chromosome 12 open reading frame 10	protein-coding
MACS_peak_16401	chr12	7052211	7052809	+	198.92	NA	promoter-TSS (NR_023317)	promoter-TSS (NR_023317)	-91	NM_001301836	113246	Hs.405913	NM_138425	ENSG00000111678	C12orf57	C10|GRCC10	chromosome 12 open reading frame 57	protein-coding
MACS_peak_16400	chr12	7051708	7051870	+	51.31	NA	promoter-TSS (NM_001301836)	promoter-TSS (NM_001301836)	-812	NM_001301836	113246	Hs.405913	NM_138425	ENSG00000111678	C12orf57	C10|GRCC10	chromosome 12 open reading frame 57	protein-coding
MACS_peak_19086	chr12	123717954	123718418	+	200.08	NA	promoter-TSS (NM_001143905)	promoter-TSS (NM_001143905)	-105	NM_001143905	91574	Hs.319128	NM_152269	ENSG00000130921	C12orf65	COXPD7|SPG55	chromosome 12 open reading frame 65	protein-coding
MACS_peak_21526	chr14	105045663	105045829	+	51.97	NA	promoter-TSS (NM_001286399)	promoter-TSS (NM_001286399)	-355	NM_001286399	400258	Hs.153827	NM_001008404	ENSG00000184601	C14orf180	C14orf77|NRAC	chromosome 14 open reading frame 180	protein-coding
MACS_peak_22089	chr15	36871368	36872067	+	191.65	NA	promoter-TSS (NM_001321758)	promoter-TSS (NM_001321758)	-110	NM_001290233	84529	Hs.48348	NM_032499	ENSG00000186073	C15orf41	HH114	chromosome 15 open reading frame 41	protein-coding
MACS_peak_22663	chr15	45722409	45722656	+	112.83	NA	promoter-TSS (NM_032413)	promoter-TSS (NM_032413)	-195	NM_197955	84419	Hs.112242	NM_032413	ENSG00000166920	C15orf48	FOAP-11|MIR147BHG|NMES1	chromosome 15 open reading frame 48	protein-coding
MACS_peak_28343	chr16	31519612	31519998	+	203.12	NA	promoter-TSS (NM_022744)	promoter-TSS (NM_022744)	-93	NM_022744	64755	Hs.9003	NM_022744	ENSG00000140688	C16orf58	RUS	chromosome 16 open reading frame 58	protein-coding
MACS_peak_28644	chr16	67143670	67144106	+	174.59	NA	promoter-TSS (NM_001320540)	promoter-TSS (NM_001320540)	44	NM_001320541	80262	Hs.513666	NM_025187	ENSG00000125149	C16orf70	C16orf6|LIN10|lin-10	chromosome 16 open reading frame 70	protein-coding
MACS_peak_26725	chr16	9184711	9185298	+	286.01	NA	promoter-TSS (NM_014117)	promoter-TSS (NM_014117)	-497	NM_014117	29035	Hs.221497	NM_014117	ENSG00000182831	C16orf72	PRO0149	chromosome 16 open reading frame 72	protein-coding
MACS_peak_25823	chr16	1470408	1471333	+	703.98	NA	promoter-TSS (NM_001272051)	promoter-TSS (NM_001272051)	-122	NM_001272051	283951	Hs.58373	NM_001010878	ENSG00000174109	C16orf91	CCSMST1|URLC5|gs103	chromosome 16 open reading frame 91	protein-coding
MACS_peak_30119	chr17	6917837	6918209	+	164.27	NA	promoter-TSS (NM_001142798)	promoter-TSS (NM_001142798)	-78	NM_001142798	124944	Hs.511801	NM_174893	ENSG00000258315	C17orf49	BAP18|HEPIS	chromosome 17 open reading frame 49	protein-coding
MACS_peak_30118	chr17	6917450	6917830	+	150.45	NA	promoter-TSS (NM_001142798)	promoter-TSS (NM_001142798)	-461	NM_001142798	124944	Hs.511801	NM_174893	ENSG00000258315	C17orf49	BAP18|HEPIS	chromosome 17 open reading frame 49	protein-coding
MACS_peak_29495	chr17	259667	260276	+	270.71	NA	promoter-TSS (NM_001013672)	promoter-TSS (NM_001013672)	-145	NM_001013672	400566	Hs.499607	NM_001013672	ENSG00000187624	C17orf97	CK20|LIAT1	chromosome 17 open reading frame 97	protein-coding
MACS_peak_36290	chr18	33552194	33552863	+	263.21	NA	promoter-TSS (NM_031446)	promoter-TSS (NM_031446)	-60	NM_001201476	83608	Hs.37883	NM_031446	ENSG00000141428	C18orf21	HsT3108|PNAS-124|PNAS-131|XTP13	chromosome 18 open reading frame 21	protein-coding
MACS_peak_36346	chr18	43753522	43754140	+	240.32	NA	promoter-TSS (NM_145055)	promoter-TSS (NM_145055)	-157	NM_001008239	147339	Hs.116486	NM_145055	ENSG00000152242	C18orf25	ARKL1|Ark2N|RNF111L1	chromosome 18 open reading frame 25	protein-coding
MACS_peak_39307	chr19	30206681	30206881	+	87.88	NA	promoter-TSS (NM_001282931)	promoter-TSS (NM_001282931)	-85	NM_001256047	83636	Hs.529094	NM_031448	ENSG00000131943	C19orf12	MPAN|NBIA3|NBIA4|SPG43	chromosome 19 open reading frame 12	protein-coding
MACS_peak_39616	chr19	38794436	38794763	+	124.93	NA	promoter-TSS (NM_033520)	promoter-TSS (NM_033520)	-292	NM_001317801	64073	Hs.631544	NM_022125	ENSG00000167644	C19orf33	H2RSP|IMUP|IMUP-1|IMUP-2	chromosome 19 open reading frame 33	protein-coding
MACS_peak_38423	chr19	13885087	13885601	+	241.68	NA	promoter-TSS (NM_014047)	promoter-TSS (NM_014047)	74	NM_014047	28974	Hs.231616	NM_014047	ENSG00000104979	C19orf53	HSPC023|LYDG10	chromosome 19 open reading frame 53	protein-coding
MACS_peak_42389	chr2	68289935	68290241	+	132.79	NA	promoter-TSS (NM_173177)	promoter-TSS (NM_173177)	48	NM_173177	10438	Hs.602900	NM_006333	ENSG00000197223	C1D	LRP1|Rrp47|SUN-CoR|SUNCOR|hC1D	C1D nuclear receptor corepressor	protein-coding
MACS_peak_3707	chr1	38273239	38273536	+	86.08	NA	promoter-TSS (NM_001142726)	promoter-TSS (NM_001142726)	-75	NM_198446	127687	Hs.532749	NM_198446	ENSG00000197982	C1orf122	ALAESM	chromosome 1 open reading frame 122	protein-coding
MACS_peak_9052	chr1	228290782	228291246	+	267.89	NA	promoter-TSS (NM_024319)	promoter-TSS (NM_024319)	12	NM_024319	79169	Hs.445952	NM_024319	ENSG00000143793	C1orf35	MMTAG2	chromosome 1 open reading frame 35	protein-coding
MACS_peak_9053	chr1	228291508	228291747	+	76.43	NA	promoter-TSS (NM_024319)	promoter-TSS (NM_024319)	-601	NR_130975	79169	Hs.445952	NM_024319	ENSG00000143793	C1orf35	MMTAG2	chromosome 1 open reading frame 35	protein-coding
MACS_peak_6639	chr1	154192479	154193461	+	632.32	NA	promoter-TSS (NM_014847)	promoter-TSS (NM_014847)	96	NM_138740	25912	Hs.287471	NM_015449	ENSG00000143612	C1orf43	HSPC012|NICE-3|NICE3|NS5ATP4|S863-3	chromosome 1 open reading frame 43	protein-coding
MACS_peak_5052	chr1	85725012	85725737	+	298.62	NA	promoter-TSS (NM_198077)	promoter-TSS (NM_198077)	-29	NR_024113	148423	Hs.26226	NM_198077	ENSG00000162642	C1orf52	gm117	chromosome 1 open reading frame 52	protein-coding
MACS_peak_8475	chr1	209957623	209958259	+	204.2	NA	promoter-TSS (NM_152485)	promoter-TSS (NM_152485)	-37	NM_152485	148304	Hs.497642	NM_152485	ENSG00000162757	C1orf74	URLC4	chromosome 1 open reading frame 74	protein-coding
MACS_peak_30069	chr17	5342189	5342752	+	185.01	NA	promoter-TSS (NM_001212)	promoter-TSS (NM_001212)	5	NM_001212	708	Hs.555866	NM_001212	ENSG00000108561	C1QBP	COXPD33|GC1QBP|HABP1|SF2AP32|SF2p32|gC1Q-R|gC1qR|p32	complement C1q binding protein	protein-coding
MACS_peak_60309	chr5	34244936	34245393	+	122.19	NA	promoter-TSS (NR_146599)	promoter-TSS (NR_146599)	-335	NR_146599	114899	Hs.171929	NM_030945	ENSG00000082196	C1QTNF3	C1ATNF3|CORCS|CORS|CORS-26|CORS26|CTRP3	C1q and TNF related 3	protein-coding
MACS_peak_13078	chr11	47616073	47616406	+	81.55	NA	promoter-TSS (NM_031909)	promoter-TSS (NM_031909)	-276	NM_031909	114900	Hs.662633	NM_031909	ENSG00000172247	C1QTNF4	CTRP4|ZACRP4	C1q and TNF related 4	protein-coding
MACS_peak_13079	chr11	47616574	47617044	+	68.86	NA	promoter-TSS (NM_031909)	promoter-TSS (NM_031909)	-846	NM_031909	114900	Hs.662633	NM_031909	ENSG00000172247	C1QTNF4	CTRP4|ZACRP4	C1q and TNF related 4	protein-coding
MACS_peak_49295	chr22	37595333	37595482	+	50.78	NA	promoter-TSS (NM_001365878)	promoter-TSS (NM_001365878)	56	NM_001365878	114904	Hs.22011	NM_031910	ENSG00000133466	C1QTNF6	CTFP6|CTRP6|ZACRP6	C1q and TNF related 6	protein-coding
MACS_peak_16420	chr12	7261617	7261820	+	75.07	NA	promoter-TSS (NM_001297642)	promoter-TSS (NM_001297642)	92	NM_001297643	51279	Hs.631730	NM_016546	ENSG00000139178	C1RL	C1RL1|C1RLP|C1r-LP|CLSPa	complement C1r subcomponent like	protein-coding
MACS_peak_16418	chr12	7260606	7260944	+	96.99	NA	promoter-TSS (NR_026947)	promoter-TSS (NR_026947)	-129	NR_026947	283314	Hs.744212	NR_026947	ENSG00000205885	C1RL-AS1	MATL2963	C1RL antisense RNA 1	ncRNA
MACS_peak_65704	chr6	31865467	31865703	+	75.35	NA	promoter-TSS (NM_001282457).3	promoter-TSS (NM_001282457).3	25	NM_001282457	717	Hs.408903	NM_000063	ENSG00000166278	C2	ARMD14|CO2	complement C2	protein-coding
MACS_peak_48344	chr21	34144409	34144579	+	57.2	NA	promoter-TSS (NM_013329)	promoter-TSS (NM_013329)	83	NR_024622	54067	Hs.54725	NM_001006116		C21orf62-AS1	C21orf49	C21orf62 antisense RNA 1	ncRNA
MACS_peak_48254	chr21	19191842	19192041	+	54.85	NA	promoter-TSS (NM_017447)	promoter-TSS (NM_017447)	-268	NM_017447	54149	Hs.293811	NM_017447	ENSG00000154642	C21orf91	C21orf14|C21orf38|CSSG1|EURL|YG81	chromosome 21 open reading frame 91	protein-coding
MACS_peak_16727	chr12	22697725	22697890	+	51.4	NA	promoter-TSS (NM_001286173)	promoter-TSS (NM_001286173)	-327	NM_001286177	9847	Hs.271014	NM_014802	ENSG00000111731	C2CD5	CDP138|KIAA0528	C2 calcium dependent domain containing 5	protein-coding
MACS_peak_43433	chr2	132439763	132440054	+	96.86	NA	promoter-TSS (NM_001354871)	promoter-TSS (NM_001354871)	-164	NM_001354871	29798	Hs.635289	NM_013310		C2orf27A	C2orf27|C2orf27B	chromosome 2 open reading frame 27A	protein-coding
MACS_peak_43093	chr2	105953849	105954051	+	133.03	NA	promoter-TSS (NM_024093)	promoter-TSS (NM_024093)	-47	NM_001286537	79074	Hs.549577	NM_024093	ENSG00000135974	C2orf49	asw	chromosome 2 open reading frame 49	protein-coding
MACS_peak_42658	chr2	85838555	85838808	+	117.63	NA	promoter-TSS (NM_001256727)	promoter-TSS (NM_001256727)	508	NM_001013649	388969	Hs.516159	NM_001013649	ENSG00000168887	C2orf68	HCRCN81	chromosome 2 open reading frame 68	protein-coding
MACS_peak_43285	chr2	120124074	120124493	+	196.42	NA	promoter-TSS (NM_001178017)	promoter-TSS (NM_001178017)	35	NM_001017927	130355	Hs.99488	NM_001017927	ENSG00000186132	C2orf76	AIM29	chromosome 2 open reading frame 76	protein-coding
MACS_peak_42547	chr2	74648592	74648872	+	100.53	NA	promoter-TSS (NM_001316764)	promoter-TSS (NM_001316764)	14	NM_001316766	388963	Hs.445377	NM_001145054	ENSG00000284308	C2orf81	hCG40743	chromosome 2 open reading frame 81	protein-coding
MACS_peak_51607	chr3	44466262	44466545	+	92.89	NA	promoter-TSS (NM_001351480)	promoter-TSS (NM_001351480)	-878	NM_001351480	102724231	Hs.131918	NM_001351479		C3orf86	LINC00694	chromosome 3 open reading frame 86	protein-coding
MACS_peak_55422	chr4	120221480	120222018	+	160.6	NA	promoter-TSS (NM_001001701)	promoter-TSS (NM_001001701)	51	NM_001001701	401152	Hs.173705	NM_001001701	ENSG00000164096	C4orf3	ALN|HCVFTP1	chromosome 4 open reading frame 3	protein-coding
MACS_peak_55772	chr4	159592155	159592442	+	91.61	NA	promoter-TSS (NM_001281737)	promoter-TSS (NM_001281737)	741	NM_001008393	201725	Hs.380920	NM_001008393	ENSG00000205208	C4orf46	RCDG1	chromosome 4 open reading frame 46	protein-coding
MACS_peak_62762	chr5	133303888	133304477	+	255.82	NA	promoter-TSS (NR_134247)	promoter-TSS (NR_134247)	134	NM_020199	56951	Hs.744034	NM_020199	ENSG00000113583	C5orf15	HTGN29|KCT2	chromosome 5 open reading frame 15	protein-coding
MACS_peak_62761	chr5	133303515	133303739	+	53.01	NA	promoter-TSS (NR_134247)	promoter-TSS (NR_134247)	689	NM_020199	56951	Hs.744034	NM_020199	ENSG00000113583	C5orf15	HTGN29|KCT2	chromosome 5 open reading frame 15	protein-coding
MACS_peak_66615	chr6	107349267	107349567	+	100.49	NA	promoter-TSS (NM_016487)	promoter-TSS (NM_016487)	14	NM_001142468	51250	Hs.486084	NM_016487	ENSG00000130349	C6orf203	HSPC230|PRED31	chromosome 6 open reading frame 203	protein-coding
MACS_peak_65659	chr6	31628608	31628900	+	109.94	NA	promoter-TSS (NM_021184).5	promoter-TSS (NM_021184).5	-199	NM_021184	57827	Hs.247323	NM_021184	ENSG00000204439	C6orf47	D6S53E|G4|NG34	chromosome 6 open reading frame 47	protein-coding
MACS_peak_65935	chr6	36853480	36853906	+	157.72	NA	promoter-TSS (NM_001286635)	promoter-TSS (NM_001286635)	-35	NM_001286637	221477	Hs.433381	NM_152734	ENSG00000198663	C6orf89	BRAP|PS1TP5TP1	chromosome 6 open reading frame 89	protein-coding
MACS_peak_67485	chr7	1068710	1068998	+	121.72	NA	promoter-TSS (NR_156697)	promoter-TSS (NR_156697)	-786	NR_134537	84310	Hs.653258	NM_032350	ENSG00000146540	C7orf50	YCR016W	chromosome 7 open reading frame 50	protein-coding
MACS_peak_67497	chr7	1177914	1178138	+	66.25	NA	promoter-TSS (NM_001350970)	promoter-TSS (NM_001350970)	-133	NM_032350	84310	Hs.653258	NM_032350	ENSG00000146540	C7orf50	YCR016W	chromosome 7 open reading frame 50	protein-coding
MACS_peak_67498	chr7	1178387	1178608	+	59.43	NA	promoter-TSS (NM_001350970)	promoter-TSS (NM_001350970)	-604	NM_032350	84310	Hs.653258	NM_032350	ENSG00000146540	C7orf50	YCR016W	chromosome 7 open reading frame 50	protein-coding
MACS_peak_81563	chr9	139839795	139839980	+	52.96	NA	promoter-TSS (NM_018998)	promoter-TSS (NM_018998)	192	NM_000606	733	Hs.1285	NM_000606	ENSG00000176919	C8G	C8C	complement C8 gamma chain	protein-coding
MACS_peak_60772	chr5	39364575	39365253	+	80.7	NA	promoter-TSS (NM_001737)	promoter-TSS (NM_001737)	-317	NM_001737	735	Hs.654443	NM_001737	ENSG00000113600	C9	ARMD15|C9D	complement C9	protein-coding
MACS_peak_80847	chr9	138391548	138391839	+	84.87	NA	promoter-TSS (NM_016034)	promoter-TSS (NM_016034)	22	NM_001048265	138162	Hs.414028	NM_144654	ENSG00000160345	C9orf116	PIERCE1|RbEST47	chromosome 9 open reading frame 116	protein-coding
MACS_peak_78442	chr9	130921627	130921972	+	76.24	NA	promoter-TSS (NM_024112)	promoter-TSS (NM_024112)	-745	NM_024112	79095	Hs.522412	NM_024112	ENSG00000171159	C9orf16	EST00098	chromosome 9 open reading frame 16	protein-coding
MACS_peak_78443	chr9	130922305	130922476	+	50.82	NA	promoter-TSS (NM_024112)	promoter-TSS (NM_024112)	-154	NM_024112	79095	Hs.522412	NM_024112	ENSG00000171159	C9orf16	EST00098	chromosome 9 open reading frame 16	protein-coding
MACS_peak_75709	chr9	27573616	27574028	+	118.79	NA	promoter-TSS (NM_145005)	promoter-TSS (NM_145005)	42	NM_145005	203228	Hs.493639	NM_018325	ENSG00000147894	C9orf72	ALSFTD|DENND9|DENNL72|FTDALS|FTDALS1	C9orf72-SMCR8 complex subunit	protein-coding
MACS_peak_79311	chr9	132596964	132597835	+	454.81	NA	promoter-TSS (NM_001110303)	promoter-TSS (NM_001110303)	155	NM_016520	51759	Hs.278429	NM_016520	ENSG00000136819	C9orf78	CSU2|HCA59|HSPC220|bA409K20.3	chromosome 9 open reading frame 78	protein-coding
MACS_peak_40711	chr19	49149480	49149770	+	90.67	NA	promoter-TSS (NM_001217)	promoter-TSS (NM_001217)	-181	NM_001217	770	Hs.428446	NM_001217	ENSG00000063180	CA11	CA-RP|CA-RP II|CA-XI|CARP-2|CARPX1	carbonic anhydrase 11	protein-coding
MACS_peak_23081	chr15	63674177	63674594	+	104.46	NA	promoter-TSS (NM_001293642)	promoter-TSS (NM_001293642)	-76	NM_001293642	771	Hs.210995	NM_001218	ENSG00000074410	CA12	CA-XII|CAXII|HsT18816|T18816	carbonic anhydrase 12	protein-coding
MACS_peak_6294	chr1	150230047	150230337	+	74.22	NA	promoter-TSS (NM_012113)	promoter-TSS (NM_012113)	23	NM_012113	23632	Hs.528988	NM_012113	ENSG00000118298	CA14	CAXiV	carbonic anhydrase 14	protein-coding
MACS_peak_82205	chrX	15693316	15693871	+	250.53	NA	promoter-TSS (NR_160542)	promoter-TSS (NR_160542)	12	NR_160543	340591	Hs.732244	NR_026551	ENSG00000186312	CA5BP1	CA5BL|CA5BP|PRO2325	carbonic anhydrase 5B pseudogene 1	pseudo
MACS_peak_82204	chrX	15692813	15693094	+	113.93	NA	promoter-TSS (NR_160541)	promoter-TSS (NR_160541)	-86	NR_026551	340591	Hs.732244	NR_026551	ENSG00000186312	CA5BP1	CA5BL|CA5BP|PRO2325	carbonic anhydrase 5B pseudogene 1	pseudo
MACS_peak_44999	chr2	231577285	231577573	+	97.84	NA	promoter-TSS (NM_016289)	promoter-TSS (NM_016289)	-128	NM_016289	51719	Hs.603930	NM_016289	ENSG00000135932	CAB39	CGI-66|MO25	calcium binding protein 39	protein-coding
MACS_peak_48982	chr22	24407737	24407914	+	61.53	NA	promoter-TSS (NM_001201429)	promoter-TSS (NM_001201429)	5	NM_001199281	23523	Hs.517478	NM_012295	ENSG00000099991	CABIN1	CAIN|KB-318B8.7|PPP3IN	calcineurin binding protein 1	protein-coding
MACS_peak_36199	chr18	20714948	20715149	+	87.5	NA	promoter-TSS (NM_001100619)	promoter-TSS (NM_001100619)	520	NR_023359	91768	Hs.11108	NM_138375	ENSG00000134508	CABLES1	CABL1|CABLES|HsT2563|IK3-1	Cdk5 and Abl enzyme substrate 1	protein-coding
MACS_peak_47487	chr20	60982827	60982960	+	60.65	NA	promoter-TSS (NM_031215)	promoter-TSS (NM_031215)	-554	NM_031215	81928	Hs.301040	NM_031215	ENSG00000149679	CABLES2	C20orf150|dJ908M14.2|ik3-2	Cdk5 and Abl enzyme substrate 2	protein-coding
MACS_peak_14759	chr11	67291197	67291428	+	71.46	NA	promoter-TSS (NM_001318496)	promoter-TSS (NM_001318496)	-395	NM_001318496	51475	Hs.278984	NM_016366	ENSG00000167791	CABP2	DFNB93	calcium binding protein 2	protein-coding
MACS_peak_80138	chr9	136324849	136325408	+	220.61	NA	promoter-TSS (NM_001242369)	promoter-TSS (NM_001242369)	28	NM_017586	11094	Hs.62003	NM_017586	ENSG00000160325	CACFD1	C9orf7|D9S2135|FLOWER	calcium channel flower domain containing 1	protein-coding
MACS_peak_38398	chr19	13617378	13617615	+	98.39	NA	promoter-TSS (NM_001127221)	promoter-TSS (NM_001127221)	-203	NM_023035	773	Hs.501632	NM_000068	ENSG00000141837	CACNA1A	APCA|BI|CACNL1A4|CAV2.1|EA2|EIEE42|FHM|HPCA|MHP|MHP1|SCA6	calcium voltage-gated channel subunit alpha1 A	protein-coding
MACS_peak_33473	chr17	48637560	48637872	+	103.15	NA	promoter-TSS (NM_198385)	promoter-TSS (NM_198385)	-360	NM_001256360	8913	Hs.591169	NM_018896	ENSG00000006283	CACNA1G	Ca(V)T.1|Cav3.1|NBR13|SCA42|SCA42ND	calcium voltage-gated channel subunit alpha1 G	protein-coding
MACS_peak_33474	chr17	48639677	48639915	+	87.95	NA	promoter-TSS (NR_038439)	promoter-TSS (NR_038439)	-327	NR_038439	253962	Hs.558704	NR_038439	ENSG00000250107	CACNA1G-AS1	CAS1	CACNA1G antisense RNA 1	ncRNA
MACS_peak_17135	chr12	49208003	49208215	+	64.73	NA	promoter-TSS (NM_001206917)	promoter-TSS (NM_001206917)	-154	NM_001206917	784	Hs.250712	NM_000725	ENSG00000167535	CACNB3	CAB3|CACNLB3	calcium voltage-gated channel auxiliary subunit beta 3	protein-coding
MACS_peak_17136	chr12	49208977	49209251	+	81.36	NA	promoter-TSS (NM_001206916)	promoter-TSS (NM_001206916)	-243	NM_001206916	784	Hs.250712	NM_000725	ENSG00000167535	CACNB3	CAB3|CACNLB3	calcium voltage-gated channel auxiliary subunit beta 3	protein-coding
MACS_peak_34175	chr17	65039937	65040097	+	52.81	NA	promoter-TSS (NM_000727)	promoter-TSS (NM_000727)	-653	NM_000727	786	Hs.147989	NM_000727	ENSG00000108878	CACNG1	CACNLG	calcium voltage-gated channel auxiliary subunit gamma 1	protein-coding
MACS_peak_37330	chr19	3626697	3627208	+	224.69	NA	promoter-TSS (NM_021231)	promoter-TSS (NM_021231)	-139	NM_021231	58509	Hs.128425	NM_021231	ENSG00000105298	CACTIN	C19orf29|NY-REN-24|fSAPc	cactin, spliceosome C complex subunit	protein-coding
MACS_peak_37326	chr19	3607545	3607791	+	74.15	NA	promoter-TSS (NM_201636)	promoter-TSS (NM_201636)	423	NR_038865	404665	Hs.719726	NM_001012712	ENSG00000226800	CACTIN-AS1	C19orf29-AS1|C19orf29OS	CACTIN antisense RNA 1	ncRNA
MACS_peak_11510	chr10	120514355	120514947	+	301.81	NA	promoter-TSS (NM_153810)	promoter-TSS (NM_153810)	-169	NM_153810	143384	Hs.420024	NM_153810	ENSG00000151893	CACUL1	C10orf46|CAC1	CDK2 associated cullin domain 1	protein-coding
MACS_peak_7450	chr1	174968365	174968913	+	260.8	NA	promoter-TSS (NM_001007214)	promoter-TSS (NM_001007214)	68	NM_001007214	27101	Hs.508524	NM_014412	ENSG00000116161	CACYBP	GIG5|PNAS-107|S100A6BP|SIP	calcyclin binding protein	protein-coding
MACS_peak_41699	chr2	27440186	27440506	+	129.72	NA	promoter-TSS (NM_001306079)	promoter-TSS (NM_001306079)	88	NM_001306079	790	Hs.377010	NM_004341	ENSG00000084774	CAD	CDG1Z|EIEE50|GATD4	carbamoyl-phosphate synthetase 2, aspartate transcarbamylase, and dihydroorotase	protein-coding
MACS_peak_52711	chr3	85553237	85553397	+	53.83	NA	promoter-TSS (NM_001256505)	promoter-TSS (NM_001256505)	-892	NM_001256504	253559	Hs.164578	NM_153184	ENSG00000175161	CADM2	IGSF4D|NECL3|Necl-3|SynCAM 2|synCAM2	cell adhesion molecule 2	protein-coding
MACS_peak_17756	chr12	54120945	54121776	+	250.91	NA	promoter-TSS (NM_020898)	promoter-TSS (NM_020898)	-124	NM_020898	57658	Hs.156667	NM_020898	ENSG00000012822	CALCOCO1	Cocoa|PP13275|calphoglin	calcium binding and coiled-coil domain 1	protein-coding
MACS_peak_11341	chr10	105238772	105239045	+	89.58	NA	promoter-TSS (NM_001129742)	promoter-TSS (NM_001129742)	89	NM_001129742	119395	Hs.364624	NM_182494	ENSG00000183128	CALHM3	FAM26A|bA225H22.7	calcium homeostasis modulator 3	protein-coding
MACS_peak_21178	chr14	90863308	90863472	+	55.47	NA	promoter-TSS (NM_006888)	promoter-TSS (NM_006888)	17	NM_006888	801	Hs.282410	NM_006888	ENSG00000198668	CALM1	CALML2|CAM2|CAM3|CAMB|CAMC|CAMI|CAMIII|CPVT4|DD132|LQT14|PHKD|caM	calmodulin 1	protein-coding
MACS_peak_42106	chr2	47403336	47404178	+	449.17	NA	promoter-TSS (NM_001305624)	promoter-TSS (NM_001305624)	5	NM_001305624	805	Hs.468442	NM_001743	ENSG00000143933	CALM2	CALM|CALML2|CAM1|CAM3|CAMC|CAMII|CAMIII|LQT15|PHKD|PHKD2|caM	calmodulin 2	protein-coding
MACS_peak_23465	chr15	68499197	68499400	+	55.3	NA	promoter-TSS (NM_001286694)	promoter-TSS (NM_001286694)	-850	NM_001286695	91860	Hs.709550	NM_033429	ENSG00000129007	CALML4	NY-BR-20	calmodulin like 4	protein-coding
MACS_peak_334	chr1	1845611	1846067	+	157.44	NA	promoter-TSS (NM_001330313)	promoter-TSS (NM_001330313)	-860	NM_001330313	163688	Hs.85902	NM_138705	ENSG00000169885	CALML6	CAGLP	calmodulin like 6	protein-coding
MACS_peak_38228	chr19	13048441	13049715	+	592.39	NA	promoter-TSS (NM_004343)	promoter-TSS (NM_004343)	-336	NM_004343	811	Hs.515162	NM_004343	ENSG00000179218	CALR	CRT|HEL-S-99n|RO|SSA|cC1qR	calreticulin	protein-coding
MACS_peak_50825	chr3	9811648	9811902	+	52.91	NA	promoter-TSS (NM_003656)	promoter-TSS (NM_003656)	-144	NM_003656	8536	Hs.434875	NM_003656	ENSG00000134072	CAMK1	CAMKI	calcium/calmodulin dependent protein kinase I	protein-coding
MACS_peak_55390	chr4	114683128	114683523	+	184.26	NA	promoter-TSS (NM_001321583)	promoter-TSS (NM_001321583)	-242	NM_172127	817	Hs.144114	NM_001221	ENSG00000145349	CAMK2D	CAMKD	calcium/calmodulin dependent protein kinase II delta	protein-coding
MACS_peak_55391	chr4	114683622	114684042	+	142.61	NA	promoter-TSS (NM_001321583)	promoter-TSS (NM_001321583)	-749	NM_172127	817	Hs.144114	NM_001221	ENSG00000145349	CAMK2D	CAMKD	calcium/calmodulin dependent protein kinase II delta	protein-coding
MACS_peak_10732	chr10	75635199	75635382	+	50.2	NA	promoter-TSS (NM_172170)	promoter-TSS (NM_172170)	-941	NM_172171	818	Hs.523045	NM_001222	ENSG00000148660	CAMK2G	CAMK|CAMK-II|CAMKG	calcium/calmodulin dependent protein kinase II gamma	protein-coding
MACS_peak_62342	chr5	110559772	110560002	+	77.78	NA	promoter-TSS (NM_001744)	promoter-TSS (NM_001744)	-195	NM_001323376	814	Hs.438801	NM_001744	ENSG00000152495	CAMK4	CaMK IV|CaMK-GR|CaMKIV|caMK	calcium/calmodulin dependent protein kinase IV	protein-coding
MACS_peak_29893	chr17	3796822	3797024	+	59.07	NA	promoter-TSS (NM_172207)	promoter-TSS (NM_172207)	-576	NM_032294	84254	Hs.8417	NM_032294	ENSG00000004660	CAMKK1	CAMKKA	calcium/calmodulin dependent protein kinase kinase 1	protein-coding
MACS_peak_29891	chr17	3794771	3794932	+	55.61	NA	promoter-TSS (NM_172206)	promoter-TSS (NM_172206)	-814	NM_172206	84254	Hs.8417	NM_032294	ENSG00000004660	CAMKK1	CAMKKA	calcium/calmodulin dependent protein kinase kinase 1	protein-coding
MACS_peak_18919	chr12	121735717	121735883	+	65.27	NA	promoter-TSS (NM_172215)	promoter-TSS (NM_172215)	-178	NM_172214	10645	Hs.297343	NM_006549	ENSG00000110931	CAMKK2	CAMKK|CAMKKB	calcium/calmodulin dependent protein kinase kinase 2	protein-coding
MACS_peak_42034	chr2	44588855	44589370	+	211.18	NA	promoter-TSS (NM_024766)	promoter-TSS (NM_024766)	26	NM_024766	79823	Hs.468349	NM_024766	ENSG00000143919	CAMKMT	C2orf34|CLNMT|CaM KMT|Cam|KMT	calmodulin-lysine N-methyltransferase	protein-coding
MACS_peak_42035	chr2	44589613	44589816	+	79.72	NA	promoter-TSS (NM_001171617)	promoter-TSS (NM_001171617)	628	NM_024766	79823	Hs.468349	NM_024766	ENSG00000143919	CAMKMT	C2orf34|CLNMT|CaM KMT|Cam|KMT	calmodulin-lysine N-methyltransferase	protein-coding
MACS_peak_62894	chr5	134073462	134074539	+	490.81	NA	promoter-TSS (NM_001745)	promoter-TSS (NM_001745)	-238	NM_001745	819	Hs.529846	NM_001745	ENSG00000164615	CAMLG	CAML|GET2	calcium modulating ligand	protein-coding
MACS_peak_7842	chr1	200708207	200708433	+	62.71	NA	promoter-TSS (NM_001297707)	promoter-TSS (NM_001297707)	-380	NM_001297707	23271	Hs.23585	NM_203459	ENSG00000118200	CAMSAP2	CAMSAP1L1	calmodulin regulated spectrin associated protein family member 2	protein-coding
MACS_peak_37730	chr19	7660307	7660497	+	69.5	NA	promoter-TSS (NM_001080429)	promoter-TSS (NM_001080429)	-347	NM_001080429	57662	Hs.17686	NM_020902	ENSG00000076826	CAMSAP3	KIAA1543|NEZHA|PPP1R80	calmodulin regulated spectrin associated protein family member 3	protein-coding
MACS_peak_37729	chr19	7659928	7660106	+	50.06	NA	promoter-TSS (NM_001080429)	promoter-TSS (NM_001080429)	-732	NM_001080429	57662	Hs.17686	NM_020902	ENSG00000076826	CAMSAP3	KIAA1543|NEZHA|PPP1R80	calmodulin regulated spectrin associated protein family member 3	protein-coding
MACS_peak_862	chr1	7729803	7729984	+	65.43	NA	promoter-TSS (NM_001349625)	promoter-TSS (NM_001349625)	68	NM_001349617	23261	Hs.397705	NM_015215	ENSG00000171735	CAMTA1	CANPMR	calmodulin binding transcription activator 1	protein-coding
MACS_peak_787	chr1	6844841	6845107	+	145.18	NA	promoter-TSS (NR_149049)	promoter-TSS (NR_149049)	66	NR_149049	110841581		NR_149049		CAMTA1-DT	lncCAMTA1	CAMTA1 divergent transcript	ncRNA
MACS_peak_786	chr1	6844179	6844696	+	157.2	NA	promoter-TSS (NM_001242701)	promoter-TSS (NM_001242701)	603	NR_149049	110841581		NR_149049		CAMTA1-DT	lncCAMTA1	CAMTA1 divergent transcript	ncRNA
MACS_peak_18138	chr12	67662260	67662587	+	115.58	NA	promoter-TSS (NM_018448)	promoter-TSS (NM_018448)	-715	NM_001329675	55832	Hs.546407	NM_018448	ENSG00000111530	CAND1	TIP120|TIP120A	cullin associated and neddylation dissociated 1	protein-coding
MACS_peak_18139	chr12	67663067	67663337	+	90.55	NA	promoter-TSS (NM_018448)	promoter-TSS (NM_018448)	64	NM_001329676	55832	Hs.546407	NM_018448	ENSG00000111530	CAND1	TIP120|TIP120A	cullin associated and neddylation dissociated 1	protein-coding
MACS_peak_35147	chr17	77005787	77006219	+	202.99	NA	promoter-TSS (NM_001159772)	promoter-TSS (NM_001159772)	-157	NM_001159772	124583	Hs.8859	NM_138793	ENSG00000171302	CANT1	DBQD|DBQD1|EDM7|SCAN-1|SCAN1|SHAPY	calcium activated nucleotidase 1	protein-coding
MACS_peak_35148	chr17	77006443	77006634	+	54.97	NA	promoter-TSS (NM_001159772)	promoter-TSS (NM_001159772)	-692	NM_001159772	124583	Hs.8859	NM_138793	ENSG00000171302	CANT1	DBQD|DBQD1|EDM7|SCAN-1|SCAN1|SHAPY	calcium activated nucleotidase 1	protein-coding
MACS_peak_64777	chr5	179125318	179126042	+	332.91	NA	promoter-TSS (NM_001363999)	promoter-TSS (NM_001363999)	-108	NM_001363996	821	Hs.567968	NM_001746	ENSG00000127022	CANX	CNX|IP90|P90	calnexin	protein-coding
MACS_peak_64776	chr5	179124691	179124907	+	54.29	NA	promoter-TSS (NM_001363994)	promoter-TSS (NM_001363994)	-629	NM_001363994	821	Hs.567968	NM_001746	ENSG00000127022	CANX	CNX|IP90|P90	calnexin	protein-coding
MACS_peak_3843	chr1	40506503	40506713	+	71.15	NA	promoter-TSS (NM_001350481)	promoter-TSS (NM_001350481)	85	NM_001350481	10487	Hs.370581	NM_006367	ENSG00000131236	CAP1	CAP|CAP1-PEN	cyclase associated actin cytoskeleton regulatory protein 1	protein-coding
MACS_peak_3841	chr1	40505298	40505886	+	274.16	NA	promoter-TSS (NM_001350476)	promoter-TSS (NM_001350476)	-145	NM_001350479	10487	Hs.370581	NM_006367	ENSG00000131236	CAP1	CAP|CAP1-PEN	cyclase associated actin cytoskeleton regulatory protein 1	protein-coding
MACS_peak_3842	chr1	40506206	40506500	+	113.84	NA	promoter-TSS (NM_001350476)	promoter-TSS (NM_001350476)	-48	NM_001350477	10487	Hs.370581	NM_006367	ENSG00000131236	CAP1	CAP|CAP1-PEN	cyclase associated actin cytoskeleton regulatory protein 1	protein-coding
MACS_peak_42629	chr2	85637665	85637868	+	66.3	NA	promoter-TSS (NM_001256140)	promoter-TSS (NM_001256140)	54	NM_001256140	822	Hs.516155	NM_001747	ENSG00000042493	CAPG	AFCP|HEL-S-66|MCP	capping actin protein, gelsolin like	protein-coding
MACS_peak_14096	chr11	64949626	64949859	+	81.49	NA	promoter-TSS (NR_145677)	promoter-TSS (NR_145677)	343	NM_005186	823	Hs.502842	NM_005186	ENSG00000014216	CAPN1	CANP|CANP1|CANPL1|SPG76|muCANP|muCL	calpain 1	protein-coding
MACS_peak_14097	chr11	64950059	64950425	+	79.45	NA	promoter-TSS (NR_145677)	promoter-TSS (NR_145677)	843	NM_005186	823	Hs.502842	NM_005186	ENSG00000014216	CAPN1	CANP|CANP1|CANPL1|SPG76|muCANP|muCL	calpain 1	protein-coding
MACS_peak_45256	chr2	241525926	241526076	+	57.14	NA	promoter-TSS (NM_023083)	promoter-TSS (NM_023083)	-150	NM_023083	11132	Hs.728234	NM_021251	ENSG00000142330	CAPN10	CANP10|NIDDM1	calpain 10	protein-coding
MACS_peak_45255	chr2	241525674	241525842	+	64.57	NA	promoter-TSS (NM_023083)	promoter-TSS (NM_023083)	-25	NR_103792	101752400	Hs.585987	NR_103792	ENSG00000260942	CAPN10-DT	CAPN10-AS1|locus959	CAPN10 divergent transcript	ncRNA
MACS_peak_45254	chr2	241525325	241525504	+	50.39	NA	promoter-TSS (NM_023083)	promoter-TSS (NM_023083)	319	NR_103792	101752400	Hs.585987	NR_103792	ENSG00000260942	CAPN10-DT	CAPN10-AS1|locus959	CAPN10 divergent transcript	ncRNA
MACS_peak_8762	chr1	223899891	223900213	+	92.05	NA	promoter-TSS (NM_001748)	promoter-TSS (NM_001748)	-189	NM_001748	824	Hs.350899	NM_001748	ENSG00000162909	CAPN2	CANP2|CANPL2|CANPml|mCANP	calpain 2	protein-coding
MACS_peak_8760	chr1	223888763	223889004	+	62.56	NA	promoter-TSS (NM_001146068)	promoter-TSS (NM_001146068)	-412	NM_001146068	824	Hs.350899	NM_001748	ENSG00000162909	CAPN2	CANP2|CANPL2|CANPml|mCANP	calpain 2	protein-coding
MACS_peak_15546	chr11	76777517	76777741	+	60.79	NA	promoter-TSS (NM_004055)	promoter-TSS (NM_004055)	-389	NM_004055	726	Hs.248153	NM_004055	ENSG00000149260	CAPN5	ADNIV|HTRA3|VRNI|nCL-3	calpain 5	protein-coding
MACS_peak_51146	chr3	15247884	15248417	+	241.95	NA	promoter-TSS (NR_027927)	promoter-TSS (NR_027927)	397	NM_014296	23473	Hs.595234	NM_014296	ENSG00000131375	CAPN7	CALPAIN7|PALBH	calpain 7	protein-coding
MACS_peak_39476	chr19	36630572	36631114	+	234.01	NA	promoter-TSS (NM_001302632)	promoter-TSS (NM_001302632)	-125	NM_001003962	826	Hs.515371	NM_001749	ENSG00000126247	CAPNS1	CALPAIN4|CANP|CANPS|CAPN4|CDPS|CSS1	calpain small subunit 1	protein-coding
MACS_peak_12583	chr11	34072927	34073260	+	203.26	NA	promoter-TSS (NM_005898)	promoter-TSS (NM_005898)	-185	NM_005898	4076	Hs.471818	NM_005898	ENSG00000135387	CAPRIN1	GPIAP1|GPIP137|GRIP137|M11S1|RNG105|p137GPI	cell cycle associated protein 1	protein-coding
MACS_peak_18212	chr12	75723879	75724129	+	97.41	NA	promoter-TSS (NM_001286547)	promoter-TSS (NM_001286547)	100	NM_032606	84698	Hs.733835	NM_032606	ENSG00000180881	CAPS2	UG0636c06	calcyphosine 2	protein-coding
MACS_peak_71416	chr7	116502517	116502864	+	149.28	NA	promoter-TSS (NM_006136)	promoter-TSS (NM_006136)	49	NM_006136	830	Hs.446123	NM_006136	ENSG00000198898	CAPZA2	CAPPA2|CAPZ	capping actin protein of muscle Z-line subunit alpha 2	protein-coding
MACS_peak_2164	chr1	19812391	19812534	+	60.37	NA	promoter-TSS (NM_001313932)	promoter-TSS (NM_001313932)	-429	NM_001206540	832	Hs.432760	NM_004930	ENSG00000077549	CAPZB	CAPB|CAPPB|CAPZ	capping actin protein of muscle Z-line subunit beta	protein-coding
MACS_peak_2163	chr1	19811204	19811506	+	83.63	NA	promoter-TSS (NM_001282162)	promoter-TSS (NM_001282162)	-566	NM_001282162	832	Hs.432760	NM_004930	ENSG00000077549	CAPZB	CAPB|CAPPB|CAPZ	capping actin protein of muscle Z-line subunit beta	protein-coding
MACS_peak_44317	chr2	203776816	203777158	+	145.81	NA	promoter-TSS (NM_001352677)	promoter-TSS (NM_001352677)	-11	NM_001352677	79800	Hs.444982	NM_024744	ENSG00000138380	CARF	ALS2CR8|NYD-SP24	calcium responsive transcription factor	protein-coding
MACS_peak_44316	chr2	203775997	203776322	+	53.53	NA	promoter-TSS (NM_001352677)	promoter-TSS (NM_001352677)	-782	NM_001282911	79800	Hs.444982	NM_024744	ENSG00000138380	CARF	ALS2CR8|NYD-SP24	calcium responsive transcription factor	protein-coding
MACS_peak_26702	chr16	8963115	8963283	+	51.37	NA	promoter-TSS (NM_014316)	promoter-TSS (NM_014316)	-330	NM_001278260	23589	Hs.632184	NM_014316	ENSG00000153048	CARHSP1	CRHSP-24|CRHSP24|CSDC1	calcium regulated heat stable protein 1	protein-coding
MACS_peak_26699	chr16	8961421	8961779	+	89.31	NA	promoter-TSS (NM_001278264)	promoter-TSS (NM_001278264)	-315	NM_001278264	23589	Hs.632184	NM_014316	ENSG00000153048	CARHSP1	CRHSP-24|CRHSP24|CSDC1	calcium regulated heat stable protein 1	protein-coding
MACS_peak_26700	chr16	8961835	8962042	+	61.33	NA	promoter-TSS (NM_001278264)	promoter-TSS (NM_001278264)	280	NM_001278263	23589	Hs.632184	NM_014316	ENSG00000153048	CARHSP1	CRHSP-24|CRHSP24|CSDC1	calcium regulated heat stable protein 1	protein-coding
MACS_peak_26701	chr16	8962090	8962755	+	225.39	NA	promoter-TSS (NM_001278263)	promoter-TSS (NM_001278263)	154	NM_001278261	23589	Hs.632184	NM_014316	ENSG00000153048	CARHSP1	CRHSP-24|CRHSP24|CSDC1	calcium regulated heat stable protein 1	protein-coding
MACS_peak_65340	chr6	25279012	25279161	+	50.78	NA	promoter-TSS (NM_001173977)	promoter-TSS (NM_001173977)	-516	NM_001173977	55604	Hs.649550	NM_017640	ENSG00000079691	CARMIL1	CARMIL|CARMIL1a|LRRC16|LRRC16A|dJ501N12.1|dJ501N12.5	capping protein regulator and myosin 1 linker 1	protein-coding
MACS_peak_63519	chr5	148785665	148785955	+	77	NA	promoter-TSS (NR_105059)	promoter-TSS (NR_105059)	-598	NR_105060	728264	Hs.519666	NR_027180		CARMN	CARMEN|MIR143HG	cardiac mesoderm enhancer-associated non-coding RNA	ncRNA
MACS_peak_63520	chr5	148786228	148786447	+	67.25	NA	promoter-TSS (NR_105059)	promoter-TSS (NR_105059)	-71	NR_105060	728264	Hs.519666	NR_027180		CARMN	CARMEN|MIR143HG	cardiac mesoderm enhancer-associated non-coding RNA	ncRNA
MACS_peak_76447	chr9	77643180	77643548	+	158.78	NA	promoter-TSS (NM_152420)	promoter-TSS (NM_152420)	-18	NR_135282	138199	Hs.567688	NM_152420	ENSG00000156017	CARNMT1	C9orf41|UPF0586	carnosine N-methyltransferase 1	protein-coding
MACS_peak_14709	chr11	67182739	67182951	+	70.02	NA	promoter-TSS (NM_020811)	promoter-TSS (NM_020811)	-304	NM_001166222	57571	Hs.502982	NM_020811	ENSG00000172508	CARNS1	ATPGD1	carnosine synthase 1	protein-coding
MACS_peak_11890	chr11	3078346	3079216	+	288.26	NA	promoter-TSS (NM_001014437)	promoter-TSS (NM_001014437)	-128	NM_139273	833	Hs.274873	NM_001751	ENSG00000110619	CARS	CARS1|CYSRS|MGC:11246	cysteinyl-tRNA synthetase	protein-coding
MACS_peak_20012	chr13	111358670	111358843	+	50.39	NA	promoter-TSS (NM_024537)	promoter-TSS (NM_024537)	106	NR_147941	79587	Hs.508725	NM_024537	ENSG00000134905	CARS2	COXPD27|cysRS	cysteinyl-tRNA synthetase 2, mitochondrial	protein-coding
MACS_peak_20013	chr13	111358853	111359047	+	55.33	NA	promoter-TSS (NM_001352252)	promoter-TSS (NM_001352252)	-88	NM_001352252	79587	Hs.508725	NM_024537	ENSG00000134905	CARS2	COXPD27|cysRS	cysteinyl-tRNA synthetase 2, mitochondrial	protein-coding
MACS_peak_73836	chr8	128746131	128746537	+	135.49	NA	promoter-TSS (NR_117102)	promoter-TSS (NR_117102)	-121	NR_117101	100270680	Hs.333720	NR_117101	ENSG00000249375	CASC11	CARLO7|CARLo-7|LINC00990|TCONS_00014535	cancer susceptibility 11	ncRNA
MACS_peak_32142	chr17	38296573	38296935	+	151.94	NA	promoter-TSS (NM_007359)	promoter-TSS (NM_007359)	-36	NM_007359	22794	Hs.743287	NM_007359	ENSG00000108349	CASC3	BTZ|MLN51	CASC3 exon junction complex subunit	protein-coding
MACS_peak_22605	chr15	44580703	44581155	+	189.31	NA	promoter-TSS (NR_157849)	promoter-TSS (NR_157849)	12	NM_177974	113201	Hs.512867	NM_138423	ENSG00000166734	CASC4	H63	cancer susceptibility 4	protein-coding
MACS_peak_22604	chr15	44580455	44580699	+	85.16	NA	promoter-TSS (NR_157849)	promoter-TSS (NR_157849)	-340	NR_157849	113201	Hs.512867	NM_138423	ENSG00000166734	CASC4	H63	cancer susceptibility 4	protein-coding
MACS_peak_34601	chr17	73511558	73512121	+	276.77	NA	promoter-TSS (NM_207346)	promoter-TSS (NM_207346)	-221	NM_020753	57513	Hs.274408	NM_020753	ENSG00000177303	CASKIN2	ANKS5B	CASK interacting protein 2	protein-coding
MACS_peak_26344	chr16	3194137	3194278	+	53.42	NA	promoter-TSS (NR_132322)	promoter-TSS (NR_132322)	-85	NR_132322	197350	Hs.434132	NR_132322	ENSG00000228146	CASP16P	CASP16	caspase 16, pseudogene	pseudo
MACS_peak_55361	chr4	110624470	110624653	+	59.61	NA	promoter-TSS (NR_133012)	promoter-TSS (NR_133012)	40	NM_032992	839	Hs.654616	NM_001226	ENSG00000138794	CASP6	MCH2	caspase 6	protein-coding
MACS_peak_11457	chr10	115439059	115439455	+	134.82	NA	promoter-TSS (NM_001267057)	promoter-TSS (NM_001267057)	-171	NM_001267057	840	Hs.9216	NM_001227	ENSG00000165806	CASP7	CASP-7|CMH-1|ICE-LAP3|LICE2|MCH3	caspase 7	protein-coding
MACS_peak_11458	chr10	115439490	115439821	+	130.4	NA	promoter-TSS (NM_001227)	promoter-TSS (NM_001227)	-16	NM_033339	840	Hs.9216	NM_001227	ENSG00000165806	CASP7	CASP-7|CMH-1|ICE-LAP3|LICE2|MCH3	caspase 7	protein-coding
MACS_peak_44242	chr2	202097984	202098303	+	92.56	NA	promoter-TSS (NM_001228)	promoter-TSS (NM_001228)	-23	NM_001228	841	Hs.599762	NM_001228	ENSG00000064012	CASP8	ALPS2B|CAP4|Casp-8|FLICE|MACH|MCH5	caspase 8	protein-coding
MACS_peak_62187	chr5	95997635	95997893	+	103.01	NA	promoter-TSS (NM_001330628)	promoter-TSS (NM_001330628)	23	NM_001042442	831	Hs.436186	NM_001750	ENSG00000153113	CAST	BS-17|PLACK	calpastatin	protein-coding
MACS_peak_70690	chr7	99870040	99870398	+	177.55	NA	promoter-TSS (NM_178831)	promoter-TSS (NM_178831)	-364	NR_028040	352954	Hs.556063	NM_178831	ENSG00000239521	CASTOR3	GATS|STAG3OS	CASTOR family member 3	protein-coding
MACS_peak_70689	chr7	99869846	99870010	+	52.58	NA	promoter-TSS (NM_178831)	promoter-TSS (NM_178831)	-73	NR_028040	352954	Hs.556063	NM_178831	ENSG00000239521	CASTOR3	GATS|STAG3OS	CASTOR family member 3	protein-coding
MACS_peak_1232	chr1	10856636	10856797	+	53.52	NA	promoter-TSS (NM_017766)	promoter-TSS (NM_017766)	-13	NM_001079843	54897	Hs.439894	NM_017766	ENSG00000130940	CASZ1	CAS11|CST|SRG|ZNF693|dJ734G22.1	castor zinc finger 1	protein-coding
MACS_peak_14354	chr11	65794808	65795063	+	71.39	NA	promoter-TSS (NM_053054)	promoter-TSS (NM_053054)	-985	NM_053054	117144	Hs.189105	NM_053054	ENSG00000175294	CATSPER1	CATSPER|SPGF7	cation channel sperm associated 1	protein-coding
MACS_peak_9582	chr1	244624463	244624673	+	67.05	NA	promoter-TSS (NM_001242340)	promoter-TSS (NM_001242340)	-7	NM_173807	257044	Hs.459534	NM_173807	ENSG00000179397	CATSPERE	C10orf101|C1orf101	catsper channel auxiliary subunit epsilon	protein-coding
MACS_peak_39623	chr19	38826192	38826506	+	151.45	NA	promoter-TSS (NM_021185)	promoter-TSS (NM_021185)	-121	NM_001330496	57828	Hs.324335	NM_021185	ENSG00000099338	CATSPERG	C19orf15	cation channel sperm associated auxiliary subunit gamma	protein-coding
MACS_peak_71409	chr7	116165292	116165608	+	85.99	NA	promoter-TSS (NM_001172897)	promoter-TSS (NM_001172897)	360	NM_001753	857	Hs.74034	NM_001753	ENSG00000105974	CAV1	BSCL3|CGL3|LCCNS|MSTP085|PPH3|VIP21	caveolin 1	protein-coding
MACS_peak_71408	chr7	116164694	116165286	+	251.05	NA	promoter-TSS (NM_001172895)	promoter-TSS (NM_001172895)	-73	NM_001172895	857	Hs.74034	NM_001753	ENSG00000105974	CAV1	BSCL3|CGL3|LCCNS|MSTP085|PPH3|VIP21	caveolin 1	protein-coding
MACS_peak_71406	chr7	116139310	116139488	+	53.97	NA	promoter-TSS (NM_001206747)	promoter-TSS (NM_001206747)	-393	NM_198212	858	Hs.212332	NM_001233	ENSG00000105971	CAV2	CAV	caveolin 2	protein-coding
MACS_peak_11974	chr11	6341671	6342305	+	255.32	NA	promoter-TSS (NM_145040)	promoter-TSS (NM_145040)	-257	NM_145040	112464	Hs.434044	NM_145040	ENSG00000170955	CAVIN3	HSRBC|PRKCDBP|SRBC|cavin-3	caveolae associated protein 3	protein-coding
MACS_peak_36889	chr19	1238488	1238634	+	51.74	NA	promoter-TSS (NM_152769)	promoter-TSS (NM_152769)	-557	NM_152769	255057	Hs.346575	NM_152769	ENSG00000099625	CBARP	BARP|C19orf26|DOS	CACN subunit beta associated regulatory protein	protein-coding
MACS_peak_45619	chr20	32077382	32077785	+	182.87	NA	promoter-TSS (NM_001032999)	promoter-TSS (NM_001032999)	-319	NM_001032999	9139	Hs.153934	NM_005093	ENSG00000078699	CBFA2T2	EHT|MTGR1|ZMYND3|p85	CBFA2/RUNX1 partner transcriptional co-repressor 2	protein-coding
MACS_peak_28638	chr16	67062446	67062808	+	161.15	NA	promoter-TSS (NM_022845)	promoter-TSS (NM_022845)	-425	NM_001368708	865	Hs.460988	NM_001755	ENSG00000067955	CBFB	PEBP2B	core-binding factor subunit beta	protein-coding
MACS_peak_28637	chr16	67061984	67062122	+	50.1	NA	promoter-TSS (NM_022845)	promoter-TSS (NM_022845)	-999	NM_001368708	865	Hs.460988	NM_001755	ENSG00000067955	CBFB	PEBP2B	core-binding factor subunit beta	protein-coding
MACS_peak_52795	chr3	105587935	105588184	+	90.93	NA	promoter-TSS (NR_135812)	promoter-TSS (NR_135812)	186	NM_001321790	868	Hs.430589	NM_170662	ENSG00000114423	CBLB	Cbl-b|Nbla00127|RNF56	Cbl proto-oncogene B	protein-coding
MACS_peak_52794	chr3	105587316	105587436	+	53.03	NA	promoter-TSS (NR_135812)	promoter-TSS (NR_135812)	27	NR_135812	868	Hs.430589	NM_170662	ENSG00000114423	CBLB	Cbl-b|Nbla00127|RNF56	Cbl proto-oncogene B	protein-coding
MACS_peak_52793	chr3	105587105	105587267	+	59.83	NA	promoter-TSS (NM_001321786)	promoter-TSS (NM_001321786)	-23	NM_001321789	868	Hs.430589	NM_170662	ENSG00000114423	CBLB	Cbl-b|Nbla00127|RNF56	Cbl proto-oncogene B	protein-coding
MACS_peak_48413	chr21	37442093	37442293	+	80.8	NA	promoter-TSS (NM_001286789)	promoter-TSS (NM_001286789)	-129	NM_001286789	873	Hs.88778	NM_001757	ENSG00000159228	CBR1	CBR|SDR21C1|hCBR1	carbonyl reductase 1	protein-coding
MACS_peak_55856	chr4	169930776	169931945	+	518.9	NA	promoter-TSS (NM_032783)	promoter-TSS (NM_032783)	46	NM_032783	84869	Hs.659311	NM_032783	ENSG00000145439	CBR4	SDR45C1	carbonyl reductase 4	protein-coding
MACS_peak_76389	chr9	70856599	70857239	+	359.31	NA	promoter-TSS (NM_201453)	promoter-TSS (NM_201453)	58	NM_201453	445571	Hs.645337	NM_201453	ENSG00000196873	CBWD3	bA561O23.1	COBW domain containing 3	protein-coding
MACS_peak_33213	chr17	46178524	46178875	+	165.97	NA	promoter-TSS (NM_006807)	promoter-TSS (NM_006807)	141	NM_001127228	10951	Hs.77254	NM_006807	ENSG00000108468	CBX1	CBX|HP1-BETA|HP1Hs-beta|HP1Hsbeta|M31|MOD1|p25beta	chromobox 1	protein-coding
MACS_peak_33214	chr17	46178883	46179392	+	202.54	NA	promoter-TSS (NM_001127228)	promoter-TSS (NM_001127228)	-297	NM_001127228	10951	Hs.77254	NM_006807	ENSG00000108468	CBX1	CBX|HP1-BETA|HP1Hs-beta|HP1Hsbeta|M31|MOD1|p25beta	chromobox 1	protein-coding
MACS_peak_68543	chr7	26240571	26241183	+	354.48	NA	promoter-TSS (NM_002137)	promoter-TSS (NM_002137)	-186	NM_007276	11335	Hs.381189	NM_007276	ENSG00000122565	CBX3	HECH|HP1-GAMMA|HP1Hs-gamma	chromobox 3	protein-coding
MACS_peak_35243	chr17	77813898	77814081	+	80.09	NA	promoter-TSS (NM_003655)	promoter-TSS (NM_003655)	-750	NM_003655	8535	Hs.405046	NM_003655	ENSG00000141582	CBX4	NBP16|PC2	chromobox 4	protein-coding
MACS_peak_35242	chr17	77813705	77813895	+	63.91	NA	promoter-TSS (NM_003655)	promoter-TSS (NM_003655)	-561	NM_003655	8535	Hs.405046	NM_003655	ENSG00000141582	CBX4	NBP16|PC2	chromobox 4	protein-coding
MACS_peak_17828	chr12	54673074	54674173	+	445.67	NA	promoter-TSS (NM_002136)	promoter-TSS (NM_002136)	283	NM_012117	23468	Hs.349283	NM_012117	ENSG00000094916	CBX5	HEL25|HP1|HP1A	chromobox 5	protein-coding
MACS_peak_17825	chr12	54653193	54653551	+	250.86	NA	promoter-TSS (NM_001127321)	promoter-TSS (NM_001127321)	-2	NM_001127321	23468	Hs.349283	NM_012117	ENSG00000094916	CBX5	HEL25|HP1|HP1A	chromobox 5	protein-coding
MACS_peak_17826	chr12	54653984	54654211	+	68.31	NA	promoter-TSS (NM_001127321)	promoter-TSS (NM_001127321)	-727	NM_001127321	23468	Hs.349283	NM_012117	ENSG00000094916	CBX5	HEL25|HP1|HP1A	chromobox 5	protein-coding
MACS_peak_35225	chr17	77770931	77771152	+	61.33	NA	promoter-TSS (NM_020649)	promoter-TSS (NM_020649)	-165	NM_020649	57332	Hs.387258	NM_020649	ENSG00000141570	CBX8	PC3|RC1	chromobox 8	protein-coding
MACS_peak_72436	chr8	22461835	22462322	+	196.38	NA	promoter-TSS (NM_001363069)	promoter-TSS (NM_001363069)	-192	NR_033902	57805	Hs.744848	NM_021174	ENSG00000158941	CCAR2	DBC-1|DBC1|KIAA1967|NET35|p30 DBC|p30DBC	cell cycle and apoptosis regulator 2	protein-coding
MACS_peak_36605	chr18	66382253	66382721	+	241.53	NA	promoter-TSS (NM_001350515)	promoter-TSS (NM_001350515)	34	NM_001093729	79839	Hs.280781	NM_024781	ENSG00000150636	CCDC102B	ACY1L|AN|C18orf14|HsT1731	coiled-coil domain containing 102B	protein-coding
MACS_peak_41187	chr19	56159069	56159630	+	166.21	NA	promoter-TSS (NM_001370470)	promoter-TSS (NM_001370470)	-36	NM_001370468	29903	Hs.82482	NM_013301	ENSG00000173581	CCDC106	HSU79303|ZNF581	coiled-coil domain containing 106	protein-coding
MACS_peak_41186	chr19	56158660	56158815	+	54.24	NA	promoter-TSS (NM_001370470)	promoter-TSS (NM_001370470)	-29	NM_001370467	29903	Hs.82482	NM_013301	ENSG00000173581	CCDC106	HSU79303|ZNF581	coiled-coil domain containing 106	protein-coding
MACS_peak_75949	chr9	35658198	35658595	+	159.79	NA	promoter-TSS (NR_003051)	promoter-TSS (NR_003051)	107	NM_001195201	203260	Hs.745107	NM_174923	ENSG00000159884	CCDC107	PSEC0222	coiled-coil domain containing 107	protein-coding
MACS_peak_62401	chr5	114631831	114632100	+	122.97	NA	promoter-TSS (NM_152549)	promoter-TSS (NM_152549)	22	NM_152549	153733	Hs.436121	NM_152549	ENSG00000164221	CCDC112	MBC1	coiled-coil domain containing 112	protein-coding
MACS_peak_40631	chr19	48824981	48825453	+	189.89	NA	promoter-TSS (NM_001364171)	promoter-TSS (NM_001364171)	11	NM_001364171	93233	Hs.112645	NM_144577	ENSG00000105479	CCDC114	CILD20	coiled-coil domain containing 114	protein-coding
MACS_peak_43409	chr2	131100493	131100801	+	139.22	NA	promoter-TSS (NR_135548)	promoter-TSS (NR_135548)	-393	NM_001321118	84317	Hs.104203	NM_032357	ENSG00000136710	CCDC115	CDG2O|ccp1	coiled-coil domain containing 115	protein-coding
MACS_peak_43407	chr2	131099956	131100151	+	89.84	NA	promoter-TSS (NR_135548)	promoter-TSS (NR_135548)	201	NR_104471	84317	Hs.104203	NM_032357	ENSG00000136710	CCDC115	CDG2O|ccp1	coiled-coil domain containing 115	protein-coding
MACS_peak_43408	chr2	131100273	131100472	+	74.27	NA	promoter-TSS (NR_135548)	promoter-TSS (NR_135548)	-118	NM_001321118	84317	Hs.104203	NM_032357	ENSG00000136710	CCDC115	CDG2O|ccp1	coiled-coil domain containing 115	protein-coding
MACS_peak_49079	chr22	29168655	29168821	+	51.97	NA	promoter-TSS (NM_001284265)	promoter-TSS (NM_001284265)	55	NM_173510	150275	Hs.406460	NM_173510	ENSG00000159873	CCDC117	dJ366L4.1	coiled-coil domain containing 117	protein-coding
MACS_peak_61458	chr5	68628286	68628846	+	257.63	NA	promoter-TSS (NM_176816)	promoter-TSS (NM_176816)	54	NM_001297697	202243	Hs.654850	NM_176816	ENSG00000183323	CCDC125	KENAE	coiled-coil domain containing 125	protein-coding
MACS_peak_35581	chr17	79633444	79634159	+	338.67	NA	promoter-TSS (NR_130938)	promoter-TSS (NR_130938)	34	NM_199287	339230	Hs.744125	NM_199287	ENSG00000185298	CCDC137	RaRF	coiled-coil domain containing 137	protein-coding
MACS_peak_38081	chr19	11545783	11546015	+	83.25	NA	promoter-TSS (NM_001289102)	promoter-TSS (NM_001289102)	43	NM_001302454	115948	Hs.124010	NM_145045	ENSG00000198003	CCDC151	CILD30	coiled-coil domain containing 151	protein-coding
MACS_peak_60938	chr5	42756044	42756527	+	60.98	NA	promoter-TSS (NM_001134848)	promoter-TSS (NM_001134848)	-635	NM_001134848	100129792	Hs.745017	NM_001134848	ENSG00000198865	CCDC152	CH5400	coiled-coil domain containing 152	protein-coding
MACS_peak_4194	chr1	45965461	45965863	+	118.82	NA	promoter-TSS (NR_033298)	promoter-TSS (NR_033298)	83	NR_033297	126661	Hs.461300	NM_001102601	ENSG00000280670	CCDC163	C1orf231|CCDC163P	coiled-coil domain containing 163	protein-coding
MACS_peak_65978	chr6	37467498	37467804	+	117.43	NA	promoter-TSS (NM_138493)	promoter-TSS (NM_138493)	18	NM_138493	154467	Hs.284207	NM_138493	ENSG00000198937	CCDC167	C6orf129|HSPC265	coiled-coil domain containing 167	protein-coding
MACS_peak_19437	chr13	36872002	36872182	+	60.56	NA	promoter-TSS (NM_001144981)	promoter-TSS (NM_001144981)	-100	NM_001144982	728591	Hs.656745	NM_001144981	ENSG00000242715	CCDC169	C13orf38	coiled-coil domain containing 169	protein-coding
MACS_peak_75546	chr9	15552490	15553352	+	284.71	NA	promoter-TSS (NM_001348002)	promoter-TSS (NM_001348002)	-120	NM_001348002	203238	Hs.17267	NM_173550	ENSG00000164989	CCDC171	C9orf93|bA536D16.1|bA778P13.1	coiled-coil domain containing 171	protein-coding
MACS_peak_75545	chr9	15552312	15552487	+	50.04	NA	promoter-TSS (NM_001348002)	promoter-TSS (NM_001348002)	-642	NM_001348002	203238	Hs.17267	NM_173550	ENSG00000164989	CCDC171	C9orf93|bA536D16.1|bA778P13.1	coiled-coil domain containing 171	protein-coding
MACS_peak_51123	chr3	14692951	14693755	+	394.75	NA	promoter-TSS (NR_135523)	promoter-TSS (NR_135523)	84	NM_016474	51244	Hs.517820	NM_016474	ENSG00000154781	CCDC174	C3orf19|HSPC212|IHPM|IHPMR	coiled-coil domain containing 174	protein-coding
MACS_peak_81471	chr9	139690279	139690706	+	64.77	NA	promoter-TSS (NM_001039374)	promoter-TSS (NM_001039374)	-298	NM_001039374	84960	Hs.728796	NM_032874	ENSG00000213213	CCDC183	KIAA1984|PARF|bA216L13.7	coiled-coil domain containing 183	protein-coding
MACS_peak_81485	chr9	139703894	139704196	+	59.4	NA	promoter-TSS (NR_024580)	promoter-TSS (NR_024580)	-745	NR_024580	100131193	Hs.734812	NR_024580	ENSG00000228544	CCDC183-AS1	KIAA1984-AS1	CCDC183 antisense RNA 1	ncRNA
MACS_peak_8755	chr1	223566305	223566431	+	51.87	NA	promoter-TSS (NM_152610)	promoter-TSS (NM_152610)	-389	NM_152610	164127	Hs.192090	NM_152610	ENSG00000178395	CCDC185	C1orf65	coiled-coil domain containing 185	protein-coding
MACS_peak_11467	chr10	115933895	115934078	+	87.35	NA	promoter-TSS (NM_153249)	promoter-TSS (NM_153249)	-7	NR_135815	55088	Hs.159066	NM_018017	ENSG00000165813	CCDC186	C10orf118|CCCP-1|golgin104	coiled-coil domain containing 186	protein-coding
MACS_peak_28238	chr16	30773187	30773823	+	319.27	NA	promoter-TSS (NM_001195620)	promoter-TSS (NM_001195620)	60	NM_001195620	90835	Hs.724010	NM_001014979	ENSG00000196118	CCDC189	C16orf93	coiled-coil domain containing 189	protein-coding
MACS_peak_52869	chr3	113775070	113775480	+	178.21	NA	promoter-TSS (NM_001256836)	promoter-TSS (NM_001256836)	98	NM_020817	57577	Hs.477159	NM_020817	ENSG00000163617	CCDC191	KIAA1407	coiled-coil domain containing 191	protein-coding
MACS_peak_66949	chr6	139094547	139094898	+	111.69	NA	promoter-TSS (NM_015439)	promoter-TSS (NM_015439)	65	NM_015439	25901	Hs.412019	NM_015439	ENSG00000024862	CCDC28A	C6orf80|CCRL1AP	coiled-coil domain containing 28A	protein-coding
MACS_peak_3976	chr1	42928848	42929219	+	171.62	NA	promoter-TSS (NM_001355227)	promoter-TSS (NM_001355227)	76	NM_001355227	728621	Hs.729640	NM_001080850	ENSG00000186409	CCDC30	PFD6L|PFDN6L	coiled-coil domain containing 30	protein-coding
MACS_peak_22258	chr15	40857343	40857561	+	74.43	NA	promoter-TSS (NM_001080791)	promoter-TSS (NM_001080791)	-196	NM_001289132	90416	Hs.654661	NM_052849	ENSG00000128891	CCDC32	C15orf57	coiled-coil domain containing 32	protein-coding
MACS_peak_23957	chr15	74609983	74610468	+	181.35	NA	promoter-TSS (NM_001287181)	promoter-TSS (NM_001287181)	-675	NM_001287181	80125	Hs.383206	NM_025055	ENSG00000140481	CCDC33	CT61|HP11097	coiled-coil domain containing 33	protein-coding
MACS_peak_12440	chr11	27384106	27385332	+	378.22	NA	promoter-TSS (NM_030771)	promoter-TSS (NM_030771)	43	NM_030771	91057	Hs.143733	NM_030771	ENSG00000109881	CCDC34	L15|NY-REN-41|RAMA3	coiled-coil domain containing 34	protein-coding
MACS_peak_33997	chr17	61850596	61851544	+	470.07	NA	promoter-TSS (NM_020198)	promoter-TSS (NM_020198)	-113	NM_020198	57003	Hs.202011	NM_020198	ENSG00000108588	CCDC47	GK001|MSTP041|THNS	coiled-coil domain containing 47	protein-coding
MACS_peak_53971	chr3	191046893	191047180	+	104.88	NA	promoter-TSS (NM_174908)	promoter-TSS (NM_174908)	-147	NM_174908	152137	Hs.478682	NM_174908	ENSG00000152492	CCDC50	C3orf6|DFNA44|YMER	coiled-coil domain containing 50	protein-coding
MACS_peak_18261	chr12	82751889	82752418	+	224.77	NA	promoter-TSS (NM_001319675)	promoter-TSS (NM_001319675)	13	NM_014167	29080	Hs.582627	NM_014167	ENSG00000133773	CCDC59	BR22|HSPC128|TAP26	coiled-coil domain containing 59	protein-coding
MACS_peak_10449	chr10	61666252	61666730	+	221.96	NA	promoter-TSS (NM_005436)	promoter-TSS (NM_005436)	-177	NM_005436	8030	Hs.591360	NM_005436	ENSG00000108091	CCDC6	D10S170|H4|PTC|TPC|TST1	coiled-coil domain containing 6	protein-coding
MACS_peak_10196	chr10	32734902	32735311	+	178.61	NA	promoter-TSS (NR_120660)	promoter-TSS (NR_120660)	38	NR_109827	79741	Hs.585464	NM_024688	ENSG00000216937	CCDC7	BIOT2|BioT2-A|BioT2-B|BioT2-C|C10orf68	coiled-coil domain containing 7	protein-coding
MACS_peak_25680	chr16	776090	776284	+	62.64	NA	promoter-TSS (NM_001290137)	promoter-TSS (NM_001290137)	256	NM_001031737	124093	Hs.381943	NM_173476	ENSG00000162004	CCDC78	C16orf25|CNM4|JFP10|hsCCDC78	coiled-coil domain containing 78	protein-coding
MACS_peak_15800	chr11	96122478	96123480	+	410.86	NA	promoter-TSS (NM_001363594)	promoter-TSS (NM_001363594)	1	NM_001363594	79780	Hs.525088	NM_014148	ENSG00000149231	CCDC82	HSPC048	coiled-coil domain containing 82	protein-coding
MACS_peak_15675	chr11	85565667	85566065	+	131.84	NA	promoter-TSS (NM_001286159)	promoter-TSS (NM_001286159)	-278	NM_001286159	220047	Hs.567774	NM_173556	ENSG00000150676	CCDC83	CT148|HSD9|KP-CoT-23	coiled-coil domain containing 83	protein-coding
MACS_peak_15925	chr11	118868609	118868902	+	96.21	NA	promoter-TSS (NM_198489)	promoter-TSS (NM_198489)	-93	NR_104050	338657	Hs.534613	NM_198489	ENSG00000186166	CCDC84	DLNB14	coiled-coil domain containing 84	protein-coding
MACS_peak_14312	chr11	65657636	65658062	+	135.47	NA	promoter-TSS (NM_006848)	promoter-TSS (NM_006848)	-295	NM_006848	11007	Hs.66713	NM_006848	ENSG00000175602	CCDC85B	DIPA	coiled-coil domain containing 85B	protein-coding
MACS_peak_42204	chr2	55646805	55647254	+	182.41	NA	promoter-TSS (NM_001365480)	promoter-TSS (NM_001365480)	-37	NM_001365480	55704	Hs.292925	NM_018084	ENSG00000115355	CCDC88A	APE|GIRDIN|GIV|GRDN|HkRP1|KIAA1212|PEHO|PEHOL	coiled-coil domain containing 88A	protein-coding
MACS_peak_13941	chr11	64107214	64107525	+	110.12	NA	promoter-TSS (NM_032251)	promoter-TSS (NM_032251)	-307	NM_032251	283234	Hs.98564	NM_032251	ENSG00000168071	CCDC88B	BRLZ|CCDC88|HKRP3|gipie	coiled-coil domain containing 88B	protein-coding
MACS_peak_21196	chr14	91885023	91885184	+	60.17	NA	promoter-TSS (NM_001080414)	promoter-TSS (NM_001080414)	-939	NM_001080414	440193	Hs.525536	NM_001080414	ENSG00000015133	CCDC88C	DAPLE|HKRP2|HYC1|KIAA1509|SCA40	coiled-coil domain containing 88C	protein-coding
MACS_peak_21195	chr14	91884807	91884949	+	53.08	NA	promoter-TSS (NM_001080414)	promoter-TSS (NM_001080414)	-714	NM_001080414	440193	Hs.525536	NM_001080414	ENSG00000015133	CCDC88C	DAPLE|HKRP2|HYC1|KIAA1509|SCA40	coiled-coil domain containing 88C	protein-coding
MACS_peak_15655	chr11	82997988	82998333	+	86.2	NA	promoter-TSS (NM_001286116)	promoter-TSS (NM_001286116)	-710	NM_021825	60492	Hs.368866	NM_021825	ENSG00000137500	CCDC90B	MDS011|MDS025	coiled-coil domain containing 90B	protein-coding
MACS_peak_16808	chr12	28343087	28343381	+	76.27	NA	promoter-TSS (NM_001352080)	promoter-TSS (NM_001352080)	-155	NM_001330367	55297	Hs.653125	NM_018318	ENSG00000123106	CCDC91	HSD8|p56	coiled-coil domain containing 91	protein-coding
MACS_peak_22214	chr15	40633081	40633463	+	93.23	NA	promoter-TSS (NM_207380)	promoter-TSS (NM_207380)	-104	NM_207380	388115	Hs.32433	NM_207380	ENSG00000188549	CCDC9B	C15orf52	coiled-coil domain containing 9B	protein-coding
MACS_peak_61078	chr5	43396737	43397564	+	202.33	NA	promoter-TSS (NM_001301875)	promoter-TSS (NM_001301875)	89	NM_001301875	56477	Hs.656904	NM_019846	ENSG00000151882	CCL28	CCK1|MEC|SCYA28	C-C motif chemokine ligand 28	protein-coding
MACS_peak_69066	chr7	45039477	45039704	+	95.5	NA	promoter-TSS (NM_031443)	promoter-TSS (NM_031443)	-197	NM_031443	83605	Hs.148272	NM_031443	ENSG00000136280	CCM2	C7orf22|OSM|PP10187	CCM2 scaffold protein	protein-coding
MACS_peak_5065	chr1	86046080	86046598	+	251.19	NA	promoter-TSS (NM_001554)	promoter-TSS (NM_001554)	-105	NM_001554	3491	Hs.8867	NM_001554	ENSG00000142871	CCN1	CYR61|GIG1|IGFBP10	cellular communication network factor 1	protein-coding
MACS_peak_66864	chr6	132272488	132272762	+	102.62	NA	promoter-TSS (NM_001901)	promoter-TSS (NM_001901)	-113	NM_001901	1490	Hs.410037	NM_001901	ENSG00000118523	CCN2	CTGF|HCS24|IGFBP8|NOV2	cellular communication network factor 2	protein-coding
MACS_peak_46205	chr20	43343079	43343529	+	200.41	NA	promoter-TSS (NM_001323370)	promoter-TSS (NM_001323370)	-181	NM_003881	8839	Hs.592145	NM_003881	ENSG00000064205	CCN5	CT58|CTGF-L|WISP2	cellular communication network factor 5	protein-coding
MACS_peak_61439	chr5	68462489	68463200	+	289.36	NA	promoter-TSS (NM_001354844)	promoter-TSS (NM_001354844)	7	NM_001354845	891	Hs.23960	NM_031966	ENSG00000134057	CCNB1	CCNB	cyclin B1	protein-coding
MACS_peak_66568	chr6	100016223	100016745	+	220.35	NA	promoter-TSS (NM_005190)	promoter-TSS (NM_005190)	52	NM_005190	892	Hs.430646	NM_005190	ENSG00000112237	CCNC	CycC|SRB11|hSRB11	cyclin C	protein-coding
MACS_peak_15060	chr11	69454982	69455372	+	122.81	NA	promoter-TSS (NM_053056)	promoter-TSS (NM_053056)	-696	NM_053056	595	Hs.523852	NM_053056	ENSG00000110092	CCND1	BCL1|D11S287E|PRAD1|U21B31	cyclin D1	protein-coding
MACS_peak_22535	chr15	43477328	43477695	+	122.26	NA	promoter-TSS (NR_045999)	promoter-TSS (NR_045999)	-90	NM_012142	23582	Hs.36794	NM_012142	ENSG00000166946	CCNDBP1	DIP1|GCIP|HHM	cyclin D1 binding protein 1	protein-coding
MACS_peak_73345	chr8	95907172	95907792	+	212.3	NA	promoter-TSS (NM_057749)	promoter-TSS (NM_057749)	0	NM_057749	9134	Hs.521693	NM_004702	ENSG00000175305	CCNE2	CYCE2	cyclin E2	protein-coding
MACS_peak_26109	chr16	2479034	2479240	+	107.56	NA	promoter-TSS (NM_001761)	promoter-TSS (NM_001761)	-311	NM_001761	899	Hs.1973	NM_001761	ENSG00000162063	CCNF	FBX1|FBXO1	cyclin F	protein-coding
MACS_peak_55091	chr4	77997074	77997658	+	306.13	NA	promoter-TSS (NM_006835)	promoter-TSS (NM_006835)	-224	NM_006835	10983	Hs.518827	NM_006835	ENSG00000118816	CCNI	CCNI1|CYC1|CYI	cyclin I	protein-coding
MACS_peak_21281	chr14	99947727	99948040	+	90	NA	promoter-TSS (NM_199123)	promoter-TSS (NM_199123)	137	NM_001099402	8812	Hs.510409	NM_003858	ENSG00000090061	CCNK	CPR4|IDDHDF	cyclin K	protein-coding
MACS_peak_61219	chr5	54529112	54530602	+	555.05	NA	promoter-TSS (NM_021147)	promoter-TSS (NM_021147)	-312	NR_125347	10309	Hs.3041	NM_021147	ENSG00000152669	CCNO	CCNU|CILD29|UDG2	cyclin O	protein-coding
MACS_peak_17123	chr12	49110678	49111043	+	139.73	NA	promoter-TSS (NM_001240)	promoter-TSS (NM_001240)	-370	NM_001277842	904	Hs.92308	NM_001240	ENSG00000129315	CCNT1	CCNT|CYCT1|HIVE1	cyclin T1	protein-coding
MACS_peak_43483	chr2	135676715	135676893	+	74.87	NA	promoter-TSS (NR_036549)	promoter-TSS (NR_036549)	412	NM_001320748	905	Hs.744115	NM_001241	ENSG00000082258	CCNT2	CYCT2	cyclin T2	protein-coding
MACS_peak_43482	chr2	135676083	135676710	+	237.01	NA	promoter-TSS (NM_001320749)	promoter-TSS (NM_001320749)	4	NM_001320748	905	Hs.744115	NM_001241	ENSG00000082258	CCNT2	CYCT2	cyclin T2	protein-coding
MACS_peak_22847	chr15	55700787	55701043	+	73.58	NA	promoter-TSS (NM_001204450)	promoter-TSS (NM_001204450)	-207	NM_001204450	9236	Hs.285051	NM_004748	ENSG00000260916	CCPG1	CPR8	cell cycle progression 1	protein-coding
MACS_peak_22846	chr15	55700296	55700776	+	209.82	NA	promoter-TSS (NM_001198784)	promoter-TSS (NM_001198784)	21	NM_020739	9236	Hs.285051	NM_004748	ENSG00000260916	CCPG1	CPR8	cell cycle progression 1	protein-coding
MACS_peak_32246	chr17	38716381	38716829	+	130.36	NA	promoter-TSS (NM_001301718)	promoter-TSS (NM_001301718)	41	NM_001301718	1236	Hs.370036	NM_001838	ENSG00000126353	CCR7	BLR2|CC-CKR-7|CCR-7|CD197|CDw197|CMKBR7|EBI1	C-C motif chemokine receptor 7	protein-coding
MACS_peak_55224	chr4	91048301	91048578	+	87.76	NA	promoter-TSS (NM_001145065)	promoter-TSS (NM_001145065)	-245	NM_001145065	401145	Hs.654735	NM_207491	ENSG00000184305	CCSER1	FAM190A	coiled-coil serine rich protein 1	protein-coding
MACS_peak_18181	chr12	69979424	69979690	+	105.49	NA	promoter-TSS (NR_037475)	promoter-TSS (NR_037475)	-112	NM_001198842	10576	Hs.189772	NM_006431	ENSG00000166226	CCT2	99D8.1|CCT-beta|CCTB|HEL-S-100n|PRO1633|TCP-1-beta	chaperonin containing TCP1 subunit 2	protein-coding
MACS_peak_18180	chr12	69979205	69979354	+	50.78	NA	promoter-TSS (NR_037475)	promoter-TSS (NR_037475)	40	NM_006431	10576	Hs.189772	NM_006431	ENSG00000166226	CCT2	99D8.1|CCT-beta|CCTB|HEL-S-100n|PRO1633|TCP-1-beta	chaperonin containing TCP1 subunit 2	protein-coding
MACS_peak_6999	chr1	156307623	156308731	+	667.43	NA	promoter-TSS (NM_001304824)	promoter-TSS (NM_001304824)	29	NR_036565	7203	Hs.491494	NM_005998	ENSG00000163468	CCT3	CCT-gamma|CCTG|PIG48|TCP-1-gamma|TRIC5	chaperonin containing TCP1 subunit 3	protein-coding
MACS_peak_42293	chr2	62115256	62116138	+	438.87	NA	promoter-TSS (NM_006430)	promoter-TSS (NM_006430)	94	NM_006430	10575	Hs.421509	NM_006430	ENSG00000115484	CCT4	CCT-DELTA|Cctd|SRB	chaperonin containing TCP1 subunit 4	protein-coding
MACS_peak_42292	chr2	62114899	62115125	+	65.66	NA	promoter-TSS (NM_001321782)	promoter-TSS (NM_001321782)	779	NM_006430	10575	Hs.421509	NM_006430	ENSG00000115484	CCT4	CCT-DELTA|Cctd|SRB	chaperonin containing TCP1 subunit 4	protein-coding
MACS_peak_58064	chr5	10248912	10251580	+	1201.62	NA	promoter-TSS (NM_001258389)	promoter-TSS (NM_001258389)	-146	NM_012073	22948	Hs.1600	NM_012073	ENSG00000150753	CCT5	CCT-epsilon|CCTE|HEL-S-69|PNAS-102|TCP-1-epsilon	chaperonin containing TCP1 subunit 5	protein-coding
MACS_peak_31606	chr17	33288160	33288660	+	290.03	NA	promoter-TSS (NM_001193529)	promoter-TSS (NM_001193529)	69	NM_006584	10693	Hs.73072	NM_006584	ENSG00000132141	CCT6B	CCT-zeta-2|CCTZ-2|Cctz2|TCP-1-zeta-2|TSA303	chaperonin containing TCP1 subunit 6B	protein-coding
MACS_peak_48300	chr21	30445714	30446440	+	417.89	NA	promoter-TSS (NM_006585)	promoter-TSS (NM_006585)	41	NM_001282909	10694	Hs.125113	NM_006585	ENSG00000156261	CCT8	C21orf112|Cctq|D21S246|PRED71	chaperonin containing TCP1 subunit 8	protein-coding
MACS_peak_68117	chr7	5938164	5938530	+	175.69	NA	promoter-TSS (NM_015622)	promoter-TSS (NM_015622)	-17	NM_015622	51622	Hs.530000	NM_015622	ENSG00000122674	CCZ1	C7orf28A|CCZ1A|CGI-43|H_DJ1163J12.2	CCZ1 homolog, vacuolar protein trafficking and biogenesis associated	protein-coding
MACS_peak_68116	chr7	5937985	5938145	+	85.02	NA	promoter-TSS (NM_015622)	promoter-TSS (NM_015622)	-299	NM_015622	51622	Hs.530000	NM_015622	ENSG00000122674	CCZ1	C7orf28A|CCZ1A|CGI-43|H_DJ1163J12.2	CCZ1 homolog, vacuolar protein trafficking and biogenesis associated	protein-coding
MACS_peak_68278	chr7	6866049	6866198	+	79.57	NA	promoter-TSS (NM_198097)	promoter-TSS (NM_198097)	-197	NM_198097	221960	Hs.567779	NM_198097	ENSG00000146574	CCZ1B	C7orf28A|C7orf28B|CCZ1|H_NH0577018.2	CCZ1 homolog B, vacuolar protein trafficking and biogenesis associated	protein-coding
MACS_peak_66389	chr6	74405505	74405782	+	93.4	NA	promoter-TSS (NM_001159587)	promoter-TSS (NM_001159587)	-165	NM_001159587	135228	Hs.399891	NM_133493	ENSG00000156535	CD109	CPAMD7|p180|r150	CD109 molecule	protein-coding
MACS_peak_66673	chr6	109703477	109703849	+	225.29	NA	promoter-TSS (NM_001142403)	promoter-TSS (NM_001142403)	7	NM_006016	8763	Hs.520313	NM_006016	ENSG00000135535	CD164	DFNA66|MGC-24|MGC-24v|MUC-24|endolyn	CD164 molecule	protein-coding
MACS_peak_66674	chr6	109703856	109704345	+	176.8	NA	promoter-TSS (NM_001142403)	promoter-TSS (NM_001142403)	-85	NM_001142404	8763	Hs.520313	NM_006016	ENSG00000135535	CD164	DFNA66|MGC-24|MGC-24v|MUC-24|endolyn	CD164 molecule	protein-coding
MACS_peak_83213	chrY	21154770	21154910	+	53.76	NA	promoter-TSS (NM_013230)	promoter-TSS (NM_013230)	-40	NR_117090	100133941	Hs.644105	NM_013230	ENSG00000272398	CD24	CD24A	CD24 molecule	protein-coding
MACS_peak_75431	chr9	5450374	5450607	+	84.45	NA	promoter-TSS (NM_001314029)	promoter-TSS (NM_001314029)	-13	NM_001267706	29126	Hs.521989	NM_014143	ENSG00000120217	CD274	B7-H|B7H1|PD-L1|PDCD1L1|PDCD1LG1|PDL1|hPD-L1	CD274 molecule	protein-coding
MACS_peak_23821	chr15	73976106	73976381	+	85.44	NA	promoter-TSS (NM_001329629)	promoter-TSS (NM_001329629)	-379	NM_025240	80381	Hs.744915	NM_025240	ENSG00000103855	CD276	4Ig-B7-H3|B7-H3|B7H3|B7RP-2	CD276 molecule	protein-coding
MACS_peak_28151	chr16	30366346	30367643	+	689.25	NA	promoter-TSS (NM_001243646)	promoter-TSS (NM_001243646)	-365	NM_006110	10421	Hs.202677	NM_006110	ENSG00000169217	CD2BP2	FWP010|LIN1|PPP1R59|Snu40|U5-52K	CD2 cytoplasmic tail binding protein 2	protein-coding
MACS_peak_28150	chr16	30366096	30366294	+	87.35	NA	promoter-TSS (NM_001243646)	promoter-TSS (NM_001243646)	60	NM_001243646	10421	Hs.202677	NM_006110	ENSG00000169217	CD2BP2	FWP010|LIN1|PPP1R59|Snu40|U5-52K	CD2 cytoplasmic tail binding protein 2	protein-coding
MACS_peak_32670	chr17	41923542	41923868	+	113.91	NA	promoter-TSS (NM_001168324)	promoter-TSS (NM_001168324)	-839	NM_001168323	146894	Hs.147313	NM_145273	ENSG00000161649	CD300LG	CLM-9|CLM9|NEPMUCIN|TREM-4|TREM4	CD300 molecule like family member g	protein-coding
MACS_peak_37771	chr19	8373332	8373576	+	100.04	NA	promoter-TSS (NM_016579)	promoter-TSS (NM_016579)	-212	NM_016579	51293	Hs.558499	NM_016579	ENSG00000167775	CD320	8D6|8D6A|TCBLR|TCN2R	CD320 molecule	protein-coding
MACS_peak_40195	chr19	45909509	45910516	+	429.05	NA	promoter-TSS (NM_001142502)	promoter-TSS (NM_001142502)	110	NM_012099	10849	Hs.710495	NM_012099	ENSG00000117877	CD3EAP	ASE-1|ASE1|CAST|PAF49	CD3e molecule associated protein	protein-coding
MACS_peak_16356	chr12	6898246	6898567	+	76.25	NA	promoter-TSS (NM_000616)	promoter-TSS (NM_000616)	-288	NM_001195014	920	Hs.631659	NM_000616	ENSG00000010610	CD4	CD4mut	CD4 molecule	protein-coding
MACS_peak_12619	chr11	35160308	35161049	+	185.25	NA	promoter-TSS (NM_000610)	promoter-TSS (NM_000610)	-40	NM_000610	960	Hs.502328	NM_000610	ENSG00000026508	CD44	CDW44|CSPG8|ECMR-III|HCELL|HUTCH-I|IN|LHR|MC56|MDU2|MDU3|MIC4|Pgp1	CD44 molecule (Indian blood group)	protein-coding
MACS_peak_8444	chr1	207925168	207925756	+	213.35	NA	promoter-TSS (NM_002389)	promoter-TSS (NM_002389)	63	NM_172359	4179	Hs.510402	NM_002389	ENSG00000117335	CD46	AHUS2|MCP|MIC10|TLX|TRA2.10	CD46 molecule	protein-coding
MACS_peak_8438	chr1	207494414	207495163	+	500.42	NA	promoter-TSS (NM_001300902)	promoter-TSS (NM_001300902)	-235	NM_001114752	1604	Hs.126517	NM_000574	ENSG00000196352	CD55	CHAPLE|CR|CROM|DAF|TC	CD55 molecule (Cromer blood group)	protein-coding
MACS_peak_5707	chr1	117113560	117113754	+	53.6	NA	promoter-TSS (NR_026665)	promoter-TSS (NR_026665)	-9	NR_026665	965	Hs.34341	NM_001779	ENSG00000116815	CD58	LFA-3|LFA3|ag3	CD58 molecule	protein-coding
MACS_peak_12564	chr11	33745032	33745357	+	87.03	NA	promoter-TSS (NM_001127227)	promoter-TSS (NM_001127227)	-696	NM_001127227	966	Hs.278573	NM_000611	ENSG00000085063	CD59	16.3A5|1F5|EJ16|EJ30|EL32|G344|HRF-20|HRF20|MAC-IP|MACIF|MEM43|MIC11|MIN1|MIN2|MIN3|MIRL|MSK21|p18-20	CD59 molecule (CD59 blood group)	protein-coding
MACS_peak_12570	chr11	33758693	33758977	+	100.41	NA	promoter-TSS (NM_000611)	promoter-TSS (NM_000611)	-810	NM_203331	966	Hs.278573	NM_000611	ENSG00000085063	CD59	16.3A5|1F5|EJ16|EJ30|EL32|G344|HRF-20|HRF20|MAC-IP|MACIF|MEM43|MIC11|MIN1|MIN2|MIN3|MIRL|MSK21|p18-20	CD59 molecule (CD59 blood group)	protein-coding
MACS_peak_12569	chr11	33758282	33758656	+	92.78	NA	promoter-TSS (NM_000611)	promoter-TSS (NM_000611)	-444	NM_203331	966	Hs.278573	NM_000611	ENSG00000085063	CD59	16.3A5|1F5|EJ16|EJ30|EL32|G344|HRF-20|HRF20|MAC-IP|MACIF|MEM43|MIC11|MIN1|MIN2|MIN3|MIRL|MSK21|p18-20	CD59 molecule (CD59 blood group)	protein-coding
MACS_peak_17883	chr12	56122818	56123225	+	165.93	NA	promoter-TSS (NM_001267698)	promoter-TSS (NM_001267698)	-99	NM_001780	967	Hs.445570	NM_001780	ENSG00000135404	CD63	LAMP-3|ME491|MLA1|OMA81H|TSPAN30	CD63 molecule	protein-coding
MACS_peak_17882	chr12	56121900	56122116	+	82.12	NA	promoter-TSS (NM_001257400)	promoter-TSS (NM_001257400)	128	NM_001257392	967	Hs.445570	NM_001780	ENSG00000135404	CD63	LAMP-3|ME491|MLA1|OMA81H|TSPAN30	CD63 molecule	protein-coding
MACS_peak_30242	chr17	7482390	7482738	+	94.59	NA	promoter-TSS (NM_001040059)	promoter-TSS (NM_001040059)	-392	NM_001040059	968	Hs.647419	NM_001251	ENSG00000129226	CD68	GP110|LAMP4|SCARD1	CD68 molecule	protein-coding
MACS_peak_63658	chr5	149792370	149792642	+	75.43	NA	promoter-TSS (NM_001025158)	promoter-TSS (NM_001025158)	-7	NM_001025158	972	Hs.436568	NM_004355	ENSG00000019582	CD74	DHLAG|HLADG|II|Ia-GAMMA|p33	CD74 molecule	protein-coding
MACS_peak_12699	chr11	44586398	44586719	+	113.42	NA	promoter-TSS (NM_001024844)	promoter-TSS (NM_001024844)	-655	NM_001024844	3732	Hs.527778	NM_002231	ENSG00000085117	CD82	4F9|C33|GR15|IA4|KAI1|R2|SAR2|ST6|TSPAN27	CD82 molecule	protein-coding
MACS_peak_16251	chr12	6308781	6309082	+	77.64	NA	promoter-TSS (NM_001769)	promoter-TSS (NM_001769)	-181	NM_001330312	928	Hs.114286	NM_001769	ENSG00000010278	CD9	BTCC-1|DRAP-27|MIC3|MRP-1|TSPAN-29|TSPAN29	CD9 molecule	protein-coding
MACS_peak_82141	chrX	2608898	2609062	+	59.16	NA	promoter-TSS (NM_001321369)	promoter-TSS (NM_001321369)	-356	NM_001321368	4267	Hs.653349	NM_002414	ENSG00000002586	CD99	HBA71|MIC2|MIC2X|MIC2Y|MSK5X	CD99 molecule (Xg blood group)	protein-coding
MACS_peak_2205	chr1	20914848	20915702	+	261.22	NA	promoter-TSS (NM_001785)	promoter-TSS (NM_001785)	-315	NM_001785	978	Hs.466910	NM_001785	ENSG00000158825	CDA	CDD	cytidine deaminase	protein-coding
MACS_peak_22512	chr15	43029996	43030250	+	66.66	NA	promoter-TSS (NM_138477)	promoter-TSS (NM_138477)	-797	NM_138477	146059	Hs.599232	NM_138477	ENSG00000140326	CDAN1	CDA1|CDAI|CDAN1A|DLT|PRO1295	codanin 1	protein-coding
MACS_peak_5355	chr1	100817436	100818122	+	261.72	NA	promoter-TSS (NM_001319210)	promoter-TSS (NM_001319210)	-244	NM_033312	8556	Hs.127411	NM_003672	ENSG00000079335	CDC14A	DFNB105|DFNB32|DFNB35|cdc14|hCDC14	cell division cycle 14A	protein-coding
MACS_peak_4033	chr1	43824382	43824948	+	167.08	NA	promoter-TSS (NM_001255)	promoter-TSS (NM_001255)	13	NM_001255	991	Hs.524947	NM_001255	ENSG00000117399	CDC20	CDC20A|bA276H19.3|p55CDC	cell division cycle 20	protein-coding
MACS_peak_61213	chr5	54468822	54469163	+	103.61	NA	promoter-TSS (NM_001145734)	promoter-TSS (NM_001145734)	13	NM_152623	166979	Hs.669184	NM_152623	ENSG00000164287	CDC20B	G6VTS76519	cell division cycle 20B	protein-coding
MACS_peak_63048	chr5	137548685	137549261	+	218.15	NA	promoter-TSS (NM_004661)	promoter-TSS (NM_004661)	39	NM_004661	8697	Hs.73625	NM_004661	ENSG00000094880	CDC23	ANAPC8|APC8|CUT23	cell division cycle 23	protein-coding
MACS_peak_51803	chr3	48229710	48230500	+	394.98	NA	promoter-TSS (NM_001789)	promoter-TSS (NM_001789)	-198	NM_001789	993	Hs.437705	NM_001789	ENSG00000164045	CDC25A	CDC25A2	cell division cycle 25A	protein-coding
MACS_peak_63063	chr5	137674765	137675005	+	65.52	NA	promoter-TSS (NM_001318098)	promoter-TSS (NM_001318098)	-841	NM_001364026	995	Hs.656	NM_001790	ENSG00000158402	CDC25C	CDC25|PPP1R60	cell division cycle 25C	protein-coding
MACS_peak_77037	chr9	116037455	116038178	+	401.26	NA	promoter-TSS (NM_001322266)	promoter-TSS (NM_001322266)	36	NM_139286	246184	Hs.727648	NM_139286	ENSG00000176386	CDC26	ANAPC12|APC12|C9orf17	cell division cycle 26	protein-coding
MACS_peak_33115	chr17	45266314	45267025	+	438.9	NA	promoter-TSS (NM_001353051)	promoter-TSS (NM_001353051)	-8	NM_001353049	996	Hs.463295	NM_001256	ENSG00000004897	CDC27	ANAPC3|APC3|CDC27Hs|D0S1430E|D17S978E|H-NUC|HNUC|NUC2	cell division cycle 27	protein-coding
MACS_peak_37934	chr19	10513903	10514761	+	318.5	NA	promoter-TSS (NM_007065)	promoter-TSS (NM_007065)	-114	NM_007065	11140	Hs.160958	NM_007065	ENSG00000105401	CDC37	P50CDC37	cell division cycle 37	protein-coding
MACS_peak_37935	chr19	10514812	10515043	+	64.21	NA	promoter-TSS (NM_007065)	promoter-TSS (NM_007065)	-709	NM_007065	11140	Hs.160958	NM_007065	ENSG00000105401	CDC37	P50CDC37	cell division cycle 37	protein-coding
MACS_peak_75416	chr9	4679119	4680115	+	415.21	NA	promoter-TSS (NM_017913)	promoter-TSS (NM_017913)	48	NM_017913	55664	Hs.666439	NM_017913	ENSG00000106993	CDC37L1	CDC37B|HARC	cell division cycle 37 like 1	protein-coding
MACS_peak_2412	chr1	22379004	22379215	+	78.4	NA	promoter-TSS (NM_044472)	promoter-TSS (NM_044472)	-93	NM_044472	998	Hs.467637	NM_001791	ENSG00000070831	CDC42	CDC42Hs|G25K|TKS	cell division cycle 42	protein-coding
MACS_peak_14122	chr11	65081869	65082097	+	62.91	NA	promoter-TSS (NM_006779)	promoter-TSS (NM_006779)	-354	NM_006779	10435	Hs.343380	NM_006779	ENSG00000149798	CDC42EP2	BORG1|CEP2	CDC42 effector protein 2	protein-coding
MACS_peak_14121	chr11	65081392	65081654	+	59.76	NA	promoter-TSS (NM_006779)	promoter-TSS (NM_006779)	-814	NM_006779	10435	Hs.343380	NM_006779	ENSG00000149798	CDC42EP2	BORG1|CEP2	CDC42 effector protein 2	protein-coding
MACS_peak_14123	chr11	65082297	65082536	+	59.21	NA	promoter-TSS (NM_006779)	promoter-TSS (NM_006779)	79	NM_006779	10435	Hs.343380	NM_006779	ENSG00000149798	CDC42EP2	BORG1|CEP2	CDC42 effector protein 2	protein-coding
MACS_peak_34394	chr17	71308040	71308487	+	221.78	NA	promoter-TSS (NM_012121)	promoter-TSS (NM_012121)	-123	NM_012121	23580	Hs.3903	NM_012121	ENSG00000179604	CDC42EP4	BORG4|CEP4|KAIA1777	CDC42 effector protein 4	protein-coding
MACS_peak_34395	chr17	71308637	71308787	+	57.14	NA	promoter-TSS (NM_012121)	promoter-TSS (NM_012121)	-572	NM_012121	23580	Hs.3903	NM_012121	ENSG00000179604	CDC42EP4	BORG4|CEP4|KAIA1777	CDC42 effector protein 4	protein-coding
MACS_peak_6391	chr1	151031759	151032457	+	268.56	NA	promoter-TSS (NM_001038707)	promoter-TSS (NM_001038707)	-10	NM_020239	56882	Hs.22065	NM_020239	ENSG00000197622	CDC42SE1	SCIP1|SPEC1	CDC42 small effector 1	protein-coding
MACS_peak_66219	chr6	44355245	44355482	+	95.19	NA	promoter-TSS (NM_001253)	promoter-TSS (NM_001253)	-80	NM_001253	988	Hs.485471	NM_001253	ENSG00000096401	CDC5L	CDC5|CDC5-LIKE|CEF1|PCDC5RP|dJ319D22.1	cell division cycle 5 like	protein-coding
MACS_peak_72504	chr8	25316413	25316949	+	229.19	NA	promoter-TSS (NM_017634)	promoter-TSS (NM_017634)	-68	NM_152562	157313	Hs.33366	NM_152562	ENSG00000184661	CDCA2	PPP1R81|Repo-Man	cell division cycle associated 2	protein-coding
MACS_peak_16368	chr12	6960284	6960590	+	96.29	NA	promoter-TSS (NM_003481)	promoter-TSS (NM_003481)	657	NR_138531	83461	Hs.524216	NM_031299	ENSG00000111665	CDCA3	GRCC8|TOME-1	cell division cycle associated 3	protein-coding
MACS_peak_14079	chr11	64851246	64851787	+	334.92	NA	promoter-TSS (NM_006782)	promoter-TSS (NM_006782)	-4	NM_080668	113130	Hs.434886	NM_080668	ENSG00000146670	CDCA5	SORORIN	cell division cycle associated 5	protein-coding
MACS_peak_14078	chr11	64850892	64851145	+	86.45	NA	promoter-TSS (NM_006782)	promoter-TSS (NM_006782)	494	NM_080668	113130	Hs.434886	NM_080668	ENSG00000146670	CDCA5	SORORIN	cell division cycle associated 5	protein-coding
MACS_peak_43828	chr2	174219450	174219896	+	185.65	NA	promoter-TSS (NM_031942)	promoter-TSS (NM_031942)	73	NM_145810	83879	Hs.470654	NM_031942	ENSG00000144354	CDCA7	ICF3|JPO1	cell division cycle associated 7	protein-coding
MACS_peak_43827	chr2	174219261	174219443	+	59.92	NA	promoter-TSS (NM_031942)	promoter-TSS (NM_031942)	-248	NM_031942	83879	Hs.470654	NM_031942	ENSG00000144354	CDCA7	ICF3|JPO1	cell division cycle associated 7	protein-coding
MACS_peak_68425	chr7	21985150	21986179	+	454.13	NA	promoter-TSS (NM_001127370)	promoter-TSS (NM_001127370)	-147	NM_001127371	55536	Hs.744069	NM_018719	ENSG00000164649	CDCA7L	JPO2|R1|RAM2	cell division cycle associated 7 like	protein-coding
MACS_peak_3703	chr1	38157709	38158596	+	328.63	NA	promoter-TSS (NM_001350768)	promoter-TSS (NM_001350768)	-36	NM_018101	55143	Hs.524571	NM_018101	ENSG00000134690	CDCA8	BOR|BOREALIN|DasraB|MESRGP	cell division cycle associated 8	protein-coding
MACS_peak_51631	chr3	45187779	45187984	+	60.99	NA	promoter-TSS (NM_022842)	promoter-TSS (NM_022842)	-11	NM_022842	64866	Hs.476093	NM_022842	ENSG00000163814	CDCP1	CD318|SIMA135|TRASK	CUB domain containing protein 1	protein-coding
MACS_peak_29049	chr16	82660495	82660822	+	118.1	NA	promoter-TSS (NM_001220489)	promoter-TSS (NM_001220489)	84	NM_001220489	1012	Hs.654386	NM_001257	ENSG00000140945	CDH13	CDHH|P105	cadherin 13	protein-coding
MACS_peak_20236	chr14	23527268	23527568	+	113.96	NA	promoter-TSS (NM_022478)	promoter-TSS (NM_022478)	-671	NM_022478	64403	Hs.155912	NM_022478	ENSG00000139880	CDH24	CDH11L	cadherin 24	protein-coding
MACS_peak_26576	chr16	4588679	4588923	+	93.24	NA	promoter-TSS (NM_013399)	promoter-TSS (NM_013399)	-27	NM_013399	29965	Hs.654653	NM_013399	ENSG00000089486	CDIP1	C16orf5|CDIP|I1|LITAFL	cell death inducing p53 target 1	protein-coding
MACS_peak_28039	chr16	29874744	29875106	+	128.15	NA	promoter-TSS (NM_001286586)	promoter-TSS (NM_001286586)	-79	NR_024370	440356	Hs.448823	NR_015396	ENSG00000214725	CDIPTOSP	CDIPT-AS1	CDIP transferase opposite strand, pseudogene	ncRNA
MACS_peak_10454	chr10	62537969	62538608	+	260.49	NA	promoter-TSS (NM_033379)	promoter-TSS (NM_033379)	52	NM_001786	983	Hs.732435	NM_001786	ENSG00000170312	CDK1	CDC2|CDC28A|P34CDC2	cyclin dependent kinase 1	protein-coding
MACS_peak_302	chr1	1655403	1656190	+	447.58	NA	promoter-TSS (NM_001291345)	promoter-TSS (NM_001291345)	0	NM_001313982	728642	Hs.651228	NM_024011	ENSG00000008128	CDK11A	CDC2L2|CDC2L3|CDK11-p110|CDK11-p46|CDK11-p58|PITSLRE|p58GTA	cyclin dependent kinase 11A	protein-coding
MACS_peak_32043	chr17	37617460	37618054	+	301.45	NA	promoter-TSS (NM_016507)	promoter-TSS (NM_016507)	18	NM_015083	51755	Hs.345028	NM_015083	ENSG00000167258	CDK12	CRK7|CRKR|CRKRS	cyclin dependent kinase 12	protein-coding
MACS_peak_32042	chr17	37616954	37617147	+	59.31	NA	promoter-TSS (NM_016507)	promoter-TSS (NM_016507)	-689	NM_016507	51755	Hs.345028	NM_015083	ENSG00000167258	CDK12	CRK7|CRKR|CRKRS	cyclin dependent kinase 12	protein-coding
MACS_peak_68847	chr7	39989904	39990080	+	68.63	NA	promoter-TSS (NM_031267)	promoter-TSS (NM_031267)	33	NM_031267	8621	Hs.233552	NM_003718	ENSG00000065883	CDK13	CDC2L|CDC2L5|CHDFIDD|CHED|hCDK13	cyclin dependent kinase 13	protein-coding
MACS_peak_82460	chrX	47077781	47078104	+	106.12	NA	promoter-TSS (NM_006201)	promoter-TSS (NM_006201)	-138	NM_006201	5127	Hs.496068	NM_006201	ENSG00000102225	CDK16	PCTAIRE|PCTAIRE1|PCTGAIRE|PCTK1	cyclin dependent kinase 16	protein-coding
MACS_peak_82459	chrX	47077260	47077389	+	50.72	NA	promoter-TSS (NM_006201)	promoter-TSS (NM_006201)	-378	NM_033018	5127	Hs.496068	NM_006201	ENSG00000102225	CDK16	PCTAIRE|PCTAIRE1|PCTGAIRE|PCTK1	cyclin dependent kinase 16	protein-coding
MACS_peak_66692	chr6	111136642	111136854	+	69.95	NA	promoter-TSS (NM_001300963)	promoter-TSS (NM_001300963)	-76	NM_001300960	23097	Hs.744895	NM_015076	ENSG00000155111	CDK19	CDC2L6|CDK11|bA346C16.3	cyclin dependent kinase 19	protein-coding
MACS_peak_17909	chr12	56360560	56361055	+	169.13	NA	promoter-TSS (NM_001320122)	promoter-TSS (NM_001320122)	193	NM_001290230	1017	Hs.19192	NM_001798	ENSG00000123374	CDK2	CDKN2|p33(CDK2)	cyclin dependent kinase 2	protein-coding
MACS_peak_76573	chr9	90589396	90589842	+	222.21	NA	promoter-TSS (NM_012119)	promoter-TSS (NM_012119)	76	NM_178432	23552	Hs.522274	NM_012119	ENSG00000156345	CDK20	CCRK|CDCH|P42|PNQALRE	cyclin dependent kinase 20	protein-coding
MACS_peak_19092	chr12	123755084	123755292	+	64.74	NA	promoter-TSS (NM_001270433)	promoter-TSS (NM_001270433)	-358	NM_001270433	8099	Hs.433201	NM_004642	ENSG00000111328	CDK2AP1	DOC1|DORC1|ST19|doc-1|p12DOC-1	cyclin dependent kinase 2 associated protein 1	protein-coding
MACS_peak_14752	chr11	67275081	67276410	+	562.18	NA	promoter-TSS (NM_001271849)	promoter-TSS (NM_001271849)	-112	NM_001271849	10263	Hs.523835	NM_005851	ENSG00000167797	CDK2AP2	DOC-1R|p14	cyclin dependent kinase 2 associated protein 2	protein-coding
MACS_peak_18050	chr12	58145588	58146505	+	528.24	NA	promoter-TSS (NM_000075)	promoter-TSS (NM_000075)	47	NM_000075	1019	Hs.95577	NM_000075	ENSG00000135446	CDK4	CMM3|PSK-J3	cyclin dependent kinase 4	protein-coding
MACS_peak_45603	chr20	31989044	31989442	+	127.02	NA	promoter-TSS (NM_016408)	promoter-TSS (NM_016408)	82	NM_016408	51654	Hs.435952	NM_016082	ENSG00000101391	CDK5RAP1	C20orf34|C42|CGI-05|HSPC167	CDK5 regulatory subunit associated protein 1	protein-coding
MACS_peak_77115	chr9	123342118	123342776	+	274.23	NA	promoter-TSS (NR_073555)	promoter-TSS (NR_073555)	1	NM_001272039	55755	Hs.269560	NM_018249	ENSG00000136861	CDK5RAP2	C48|Cep215|MCPH3	CDK5 regulatory subunit associated protein 2	protein-coding
MACS_peak_33194	chr17	46048127	46048592	+	141.31	NA	promoter-TSS (NM_001278217)	promoter-TSS (NM_001278217)	37	NM_001278217	80279	Hs.20157	NM_025197	ENSG00000108465	CDK5RAP3	C53|HSF-27|IC53|LZAP|MST016|OK/SW-cl.114|PP1553	CDK5 regulatory subunit associated protein 3	protein-coding
MACS_peak_70458	chr7	92463905	92464346	+	194.78	NA	promoter-TSS (NM_001259)	promoter-TSS (NM_001259)	-852	NM_001259	1021	Hs.119882	NM_001259	ENSG00000105810	CDK6	MCPH12|PLSTIRE	cyclin dependent kinase 6	protein-coding
MACS_peak_70457	chr7	92463365	92463518	+	62.99	NA	promoter-TSS (NM_001259)	promoter-TSS (NM_001259)	-168	NM_001259	1021	Hs.119882	NM_001259	ENSG00000105810	CDK6	MCPH12|PLSTIRE	cyclin dependent kinase 6	protein-coding
MACS_peak_61451	chr5	68530393	68531173	+	235.15	NA	promoter-TSS (NR_136690)	promoter-TSS (NR_136690)	70	NM_001324074	1022	Hs.184298	NM_001799	ENSG00000134058	CDK7	CAK|CAK1|CDKN7|HCAK|MO15|STK1|p39MO15	cyclin dependent kinase 7	protein-coding
MACS_peak_19393	chr13	26828148	26828368	+	87.46	NA	promoter-TSS (NM_001346501)	promoter-TSS (NM_001346501)	-8	NM_001318368	1024	Hs.382306	NM_001260	ENSG00000132964	CDK8	K35	cyclin dependent kinase 8	protein-coding
MACS_peak_20534	chr14	50863767	50863951	+	50.53	NA	promoter-TSS (NM_004196)	promoter-TSS (NM_004196)	157	NM_001282236	8814	Hs.280881	NM_004196	ENSG00000100490	CDKL1	KKIALRE|P42	cyclin dependent kinase like 1	protein-coding
MACS_peak_62824	chr5	133702570	133703067	+	260.42	NA	promoter-TSS (NM_016508)	promoter-TSS (NM_016508)	44	NM_001113575	51265	Hs.719926	NM_016508	ENSG00000006837	CDKL3	NKIAMRE	cyclin dependent kinase like 3	protein-coding
MACS_peak_82239	chrX	18443436	18443586	+	50.46	NA	promoter-TSS (NM_001323289)	promoter-TSS (NM_001323289)	-214	NM_003159	6792	Hs.659851	NM_003159	ENSG00000008086	CDKL5	CFAP247|EIEE2|ISSX|STK9	cyclin dependent kinase like 5	protein-coding
MACS_peak_65921	chr6	36647065	36647397	+	158.75	NA	promoter-TSS (NR_144384)	promoter-TSS (NR_144384)	740	NM_000389	1026	Hs.370771	NM_000389	ENSG00000124762	CDKN1A	CAP20|CDKN1|CIP1|MDA-6|P21|SDI1|WAF1|p21CIP1	cyclin dependent kinase inhibitor 1A	protein-coding
MACS_peak_65919	chr6	36643651	36643775	+	51.43	NA	promoter-TSS (NM_001291549)	promoter-TSS (NM_001291549)	-314	NM_001291549	1026	Hs.370771	NM_000389	ENSG00000124762	CDKN1A	CAP20|CDKN1|CIP1|MDA-6|P21|SDI1|WAF1|p21CIP1	cyclin dependent kinase inhibitor 1A	protein-coding
MACS_peak_65920	chr6	36646374	36646674	+	107.15	NA	promoter-TSS (NM_000389)	promoter-TSS (NM_000389)	33	NM_000389	1026	Hs.370771	NM_000389	ENSG00000124762	CDKN1A	CAP20|CDKN1|CIP1|MDA-6|P21|SDI1|WAF1|p21CIP1	cyclin dependent kinase inhibitor 1A	protein-coding
MACS_peak_75656	chr9	21994180	21994415	+	84.39	NA	promoter-TSS (NR_120536)	promoter-TSS (NR_120536)	193	NM_058195	1029	Hs.512599	NM_000077	ENSG00000147889	CDKN2A	ARF|CDK4I|CDKN2|CMM2|INK4|INK4A|MLM|MTS-1|MTS1|P14|P14ARF|P16|P16-INK4A|P16INK4|P16INK4A|P19|P19ARF|TP16	cyclin dependent kinase inhibitor 2A	protein-coding
MACS_peak_75653	chr9	21974408	21975218	+	337.35	NA	promoter-TSS (NM_058197)	promoter-TSS (NM_058197)	13	NM_058197	1029	Hs.512599	NM_000077	ENSG00000147889	CDKN2A	ARF|CDK4I|CDKN2|CMM2|INK4|INK4A|MLM|MTS-1|MTS1|P14|P14ARF|P16|P16-INK4A|P16INK4|P16INK4A|P19|P19ARF|TP16	cyclin dependent kinase inhibitor 2A	protein-coding
MACS_peak_75658	chr9	21994931	21995216	+	123.07	NA	promoter-TSS (NM_058195)	promoter-TSS (NM_058195)	250	NM_001363763	1029	Hs.512599	NM_000077	ENSG00000147889	CDKN2A	ARF|CDK4I|CDKN2|CMM2|INK4|INK4A|MLM|MTS-1|MTS1|P14|P14ARF|P16|P16-INK4A|P16INK4|P16INK4A|P19|P19ARF|TP16	cyclin dependent kinase inhibitor 2A	protein-coding
MACS_peak_75659	chr9	21995474	21995820	+	158.69	NA	promoter-TSS (NM_001363763)	promoter-TSS (NM_001363763)	-324	NM_001363763	1029	Hs.512599	NM_000077	ENSG00000147889	CDKN2A	ARF|CDK4I|CDKN2|CMM2|INK4|INK4A|MLM|MTS-1|MTS1|P14|P14ARF|P16|P16-INK4A|P16INK4|P16INK4A|P19|P19ARF|TP16	cyclin dependent kinase inhibitor 2A	protein-coding
MACS_peak_75660	chr9	21995951	21996342	+	151.02	NA	promoter-TSS (NM_001363763)	promoter-TSS (NM_001363763)	-823	NM_001363763	1029	Hs.512599	NM_000077	ENSG00000147889	CDKN2A	ARF|CDK4I|CDKN2|CMM2|INK4|INK4A|MLM|MTS-1|MTS1|P14|P14ARF|P16|P16-INK4A|P16INK4|P16INK4A|P19|P19ARF|TP16	cyclin dependent kinase inhibitor 2A	protein-coding
MACS_peak_75652	chr9	21966310	21966513	+	50.36	NA	promoter-TSS (NR_024274)	promoter-TSS (NR_024274)	-727	NR_024274	51198	Hs.721053	NM_016349		CDKN2A-DT	C9orf53|CDKN2A-AS1|bA149I2.3	CDKN2A divergent transcript	ncRNA
MACS_peak_55942	chr4	184365526	184365841	+	89.41	NA	promoter-TSS (NM_017632)	promoter-TSS (NM_017632)	-106	NM_001317343	55602	Hs.592508	NM_017632	ENSG00000168564	CDKN2AIP	CARF	CDKN2A interacting protein	protein-coding
MACS_peak_55941	chr4	184365259	184365410	+	50.14	NA	promoter-TSS (NM_017632)	promoter-TSS (NM_017632)	-455	NM_001317343	55602	Hs.592508	NM_017632	ENSG00000168564	CDKN2AIP	CARF	CDKN2A interacting protein	protein-coding
MACS_peak_62830	chr5	133747256	133747874	+	216.23	NA	promoter-TSS (NM_080656)	promoter-TSS (NM_080656)	7	NM_080656	91368	Hs.156506	NM_080656	ENSG00000237190	CDKN2AIPNL	C2AIL	CDKN2A interacting protein N-terminal like	protein-coding
MACS_peak_75657	chr9	21994706	21994883	+	64.5	NA	promoter-TSS (NM_058195)	promoter-TSS (NM_058195)	4	NR_047542	100048912	Hs.493614	NR_003529	ENSG00000240498	CDKN2B-AS1	ANRIL|CDKN2B-AS|CDKN2BAS|NCRNA00089|PCAT12|p15AS	CDKN2B antisense RNA 1	ncRNA
MACS_peak_4385	chr1	51435265	51435580	+	113.27	NA	promoter-TSS (NM_078626)	promoter-TSS (NM_078626)	-495	NM_078626	1031	Hs.525324	NM_001262	ENSG00000123080	CDKN2C	INK4C|p18|p18-INK4C	cyclin dependent kinase inhibitor 2C	protein-coding
MACS_peak_4383	chr1	51433654	51433932	+	88.2	NA	promoter-TSS (NM_001262)	promoter-TSS (NM_001262)	-574	NM_001262	1031	Hs.525324	NM_001262	ENSG00000123080	CDKN2C	INK4C|p18|p18-INK4C	cyclin dependent kinase inhibitor 2C	protein-coding
MACS_peak_37961	chr19	10679812	10680194	+	139.62	NA	promoter-TSS (NM_079421)	promoter-TSS (NM_079421)	-348	NM_079421	1032	Hs.435051	NM_001800	ENSG00000129355	CDKN2D	INK4D|p19|p19-INK4D	cyclin dependent kinase inhibitor 2D	protein-coding
MACS_peak_37960	chr19	10679578	10679748	+	50.78	NA	promoter-TSS (NM_079421)	promoter-TSS (NM_079421)	-8	NM_079421	1032	Hs.435051	NM_001800	ENSG00000129355	CDKN2D	INK4D|p19|p19-INK4D	cyclin dependent kinase inhibitor 2D	protein-coding
MACS_peak_20606	chr14	54863503	54863894	+	129.86	NA	promoter-TSS (NM_005192)	promoter-TSS (NM_005192)	25	NM_001130851	1033	Hs.84113	NM_005192	ENSG00000100526	CDKN3	CDI1|CIP2|KAP|KAP1	cyclin dependent kinase inhibitor 3	protein-coding
MACS_peak_9946	chr10	14879527	14879975	+	153.64	NA	promoter-TSS (NM_001278205)	promoter-TSS (NM_001278205)	285	NM_001029954	441549	Hs.559067	NM_001029954	ENSG00000185267	CDNF	ARMETL1	cerebral dopamine neurotrophic factor	protein-coding
MACS_peak_50379	chr22	46646029	46646315	+	105.23	NA	promoter-TSS (NM_207327)	promoter-TSS (NM_207327)	18	NM_207327	150383	Hs.103110	NM_207327	ENSG00000205643	CDPF1	C22orf40	cysteine rich DPF motif domain containing 1	protein-coding
MACS_peak_53217	chr3	133292111	133292450	+	120.71	NA	promoter-TSS (NM_001134423)	promoter-TSS (NM_001134423)	-250	NM_017548	55573	Hs.518265	NM_017548	ENSG00000091527	CDV3	H41	CDV3 homolog	protein-coding
MACS_peak_46646	chr20	48807316	48807504	+	64.58	NA	promoter-TSS (NM_005194)	promoter-TSS (NM_005194)	43	NM_005194	1051	Hs.517106	NM_005194	ENSG00000172216	CEBPB	C/EBP-beta|IL6DBP|NF-IL6|TCF5	CCAAT enhancer binding protein beta	protein-coding
MACS_peak_46645	chr20	48806872	48807046	+	57.21	NA	promoter-TSS (NM_005194)	promoter-TSS (NM_005194)	-161	NM_001285879	1051	Hs.517106	NM_005194	ENSG00000172216	CEBPB	C/EBP-beta|IL6DBP|NF-IL6|TCF5	CCAAT enhancer binding protein beta	protein-coding
MACS_peak_46644	chr20	48805890	48806532	+	166.41	NA	promoter-TSS (NM_001285879)	promoter-TSS (NM_001285879)	-909	NM_001285879	1051	Hs.517106	NM_005194	ENSG00000172216	CEBPB	C/EBP-beta|IL6DBP|NF-IL6|TCF5	CCAAT enhancer binding protein beta	protein-coding
MACS_peak_72870	chr8	48651538	48651688	+	50.46	NA	promoter-TSS (NM_005195)	promoter-TSS (NM_005195)	-887	NM_005195	1052	Hs.440829	NM_005195	ENSG00000221869	CEBPD	C/EBP-delta|CELF|CRP3|NF-IL6-beta	CCAAT enhancer binding protein delta	protein-coding
MACS_peak_39363	chr19	33864269	33864540	+	83.74	NA	promoter-TSS (NM_001806)	promoter-TSS (NM_001806)	-211	NM_001806	1054	Hs.429666	NM_001806	ENSG00000153879	CEBPG	GPE1BP|IG/EBP-1	CCAAT enhancer binding protein gamma	protein-coding
MACS_peak_41885	chr2	37458440	37458745	+	68.36	NA	promoter-TSS (NM_001350027)	promoter-TSS (NM_001350027)	147	NM_005760	10153	Hs.135406	NM_005760	ENSG00000115816	CEBPZ	CBF|CBF2|HSP-CBF|NOC1	CCAAT enhancer binding protein zeta	protein-coding
MACS_peak_41884	chr2	37423500	37423864	+	129.56	NA	promoter-TSS (NM_001322374)	promoter-TSS (NM_001322374)	43	NM_001322373	100505876	Hs.666958	NM_001322373	ENSG00000218739	CEBPZOS	CEBPZ-AS1	CEBPZ opposite strand	protein-coding
MACS_peak_23773	chr15	72612756	72612930	+	64.32	NA	promoter-TSS (NM_001172684)	promoter-TSS (NM_001172684)	-345	NM_052840	60677	Hs.348342	NM_052840	ENSG00000140488	CELF6	BRUNOL6	CUGBP Elav-like family member 6	protein-coding
MACS_peak_5468	chr1	109791972	109792183	+	76.92	NA	promoter-TSS (NM_001408)	promoter-TSS (NM_001408)	-84	NM_001408	1952	Hs.57652	NM_001408	ENSG00000143126	CELSR2	ADGRC2|CDHF10|EGFL2|Flamingo1|MEGF3	cadherin EGF LAG seven-pass G-type receptor 2	protein-coding
MACS_peak_5467	chr1	109791604	109791816	+	63.53	NA	promoter-TSS (NM_001408)	promoter-TSS (NM_001408)	-451	NM_001408	1952	Hs.57652	NM_001408	ENSG00000143126	CELSR2	ADGRC2|CDHF10|EGFL2|Flamingo1|MEGF3	cadherin EGF LAG seven-pass G-type receptor 2	protein-coding
MACS_peak_51873	chr3	48700426	48700729	+	133.86	NA	promoter-TSS (NM_001407)	promoter-TSS (NM_001407)	-258	NM_001407	1951	Hs.631926	NM_001407	ENSG00000008300	CELSR3	ADGRC3|CDHF11|EGFL1|FMI1|HFMI1|MEGF2|RESDA1	cadherin EGF LAG seven-pass G-type receptor 3	protein-coding
MACS_peak_76423	chr9	74384256	74384414	+	68.19	NA	promoter-TSS (NM_013390)	promoter-TSS (NM_013390)	-906	NM_001349784	23670	Hs.494146	NM_013390	ENSG00000135048	CEMIP2	TMEM2	cell migration inducing hyaluronidase 2	protein-coding
MACS_peak_76422	chr9	74383376	74383586	+	64.13	NA	promoter-TSS (NM_013390)	promoter-TSS (NM_013390)	-52	NM_001349784	23670	Hs.494146	NM_013390	ENSG00000135048	CEMIP2	TMEM2	cell migration inducing hyaluronidase 2	protein-coding
MACS_peak_41678	chr2	27008770	27009059	+	117.97	NA	promoter-TSS (NM_001809)	promoter-TSS (NM_001809)	-10	NM_001809	1058	Hs.1594	NM_001809	ENSG00000115163	CENPA	CENP-A|CenH3	centromere protein A	protein-coding
MACS_peak_55006	chr4	68410972	68411380	+	201.06	NA	promoter-TSS (NM_001812)	promoter-TSS (NM_001812)	45	NM_001812	1060	Hs.479867	NM_001812	ENSG00000145241	CENPC	CENP-C|CENPC1|MIF2|hcp-4	centromere protein C	protein-coding
MACS_peak_61383	chr5	64858538	64859437	+	320.17	NA	promoter-TSS (NM_001278927)	promoter-TSS (NM_001278927)	8	NM_022145	64105	Hs.529778	NM_022145	ENSG00000123219	CENPK	AF5alpha|CENP-K|FKSG14|P33|Solt	centromere protein K	protein-coding
MACS_peak_41591	chr2	25015723	25016354	+	249.44	NA	promoter-TSS (NR_136183)	promoter-TSS (NR_136183)	54	NM_024322	79172	Hs.731569	NM_024322	ENSG00000138092	CENPO	CENP-O|ICEN-36|MCM21R	centromere protein O	protein-coding
MACS_peak_66248	chr6	49430928	49431375	+	196.78	NA	promoter-TSS (NM_018132)	promoter-TSS (NM_018132)	68	NM_018132	55166	Hs.88663	NM_018132	ENSG00000031691	CENPQ	C6orf139|CENP-Q	centromere protein Q	protein-coding
MACS_peak_1184	chr1	10490286	10490534	+	79.63	NA	promoter-TSS (NR_036462)	promoter-TSS (NR_036462)	-80	NM_198544	100526739	Hs.412311	NM_198544	ENSG00000251503	CENPS-CORT	APITD1|APITD1-CORT|CENP-S|CENPS|FAAP16|MHF1	CENPS-CORT readthrough	protein-coding
MACS_peak_78570	chr9	131182207	131182721	+	143.23	NA	promoter-TSS (NM_016174)	promoter-TSS (NM_016174)	-672	NM_016174	51148	Hs.495230	NM_016174	ENSG00000167123	CERCAM	CEECAM1|GLT25D3	cerebral endothelial cell adhesion molecule	protein-coding
MACS_peak_50447	chr22	47134873	47135186	+	136.9	NA	promoter-TSS (NM_022766)	promoter-TSS (NM_022766)	-880	NM_022766	64781	Hs.200668	NM_022766	ENSG00000100422	CERK	LK4|dA59H18.2|dA59H18.3|hCERK	ceramide kinase	protein-coding
MACS_peak_43928	chr2	182521733	182521943	+	99.38	NA	promoter-TSS (NM_001030313)	promoter-TSS (NM_001030313)	-4	NM_001030312	375298	Hs.732358	NM_201548	ENSG00000188452	CERKL	RP26	ceramide kinase like	protein-coding
MACS_peak_72950	chr8	56987015	56987393	+	154.94	NA	promoter-TSS (NM_001023)	promoter-TSS (NM_001023)	53	NR_149110	105375847		NR_149110	ENSG00000253603	CERNA3	CTA	competing endogenous lncRNA 3 for miR-645	ncRNA
MACS_peak_39185	chr19	19007611	19007777	+	58.49	NA	promoter-TSS (NM_021267)	promoter-TSS (NM_021267)	-158	NM_001290265	10715	Hs.412355	NM_021267	ENSG00000223802	CERS1	EPM8|GDF-1|GDF1|LAG1|LASS1|UOG1	ceramide synthase 1	protein-coding
MACS_peak_17361	chr12	50560854	50561661	+	228.8	NA	promoter-TSS (NR_138534)	promoter-TSS (NR_138534)	59	NM_001281731	91012	Hs.270525	NM_147190	ENSG00000139624	CERS5	LASS5|Trh4	ceramide synthase 5	protein-coding
MACS_peak_43737	chr2	169312550	169312721	+	56.64	NA	promoter-TSS (NM_001256126)	promoter-TSS (NM_001256126)	-147	NM_203463	253782	Hs.506829	NM_203463	ENSG00000172292	CERS6	CERS5|LASS6	ceramide synthase 6	protein-coding
MACS_peak_61820	chr5	74806444	74807076	+	176.45	NA	promoter-TSS (NM_016218)	promoter-TSS (NM_016218)	694	NM_005713	10087	Hs.270437	NM_005713	ENSG00000113163	CERT1	CERT|CERTL|COL4A3BP|GPBP|MRD34|STARD11	ceramide transporter 1	protein-coding
MACS_peak_28632	chr16	66968310	66968466	+	83.75	NA	promoter-TSS (NM_016062)	promoter-TSS (NM_016062)	14	NM_003869	8824	Hs.282975	NM_003869	ENSG00000172831	CES2	CE-2|CES2A1|PCE-2|iCE	carboxylesterase 2	protein-coding
MACS_peak_28989	chr16	75467252	75467588	+	118.03	NA	promoter-TSS (NM_006324)	promoter-TSS (NM_006324)	-19	NM_006324	10428	Hs.461361	NM_006324	ENSG00000153774	CFDP1	BCNT|BUCENTAUR|CENP-29|CP27|SWC5|Yeti|p97	craniofacial development protein 1	protein-coding
MACS_peak_28990	chr16	75467653	75467968	+	82.87	NA	promoter-TSS (NM_006324)	promoter-TSS (NM_006324)	-409	NM_006324	10428	Hs.461361	NM_006324	ENSG00000153774	CFDP1	BCNT|BUCENTAUR|CENP-29|CP27|SWC5|Yeti|p97	craniofacial development protein 1	protein-coding
MACS_peak_14298	chr11	65625507	65626047	+	332.42	NA	promoter-TSS (NM_005507)	promoter-TSS (NM_005507)	-126	NM_005507	1072	Hs.170622	NM_005507	ENSG00000172757	CFL1	CFL|HEL-S-15|cofilin	cofilin 1	protein-coding
MACS_peak_10948	chr10	89578220	89578484	+	89.11	NA	promoter-TSS (NR_135914)	promoter-TSS (NR_135914)	282	NR_028492	142913	Hs.369431	NR_028492	ENSG00000223820	CFL1P1	CFLP1	cofilin 1 pseudogene 1	pseudo
MACS_peak_44237	chr2	201983055	201983863	+	283.76	NA	promoter-TSS (NR_147252)	promoter-TSS (NR_147252)	20	NM_001127183	8837	Hs.390736	NM_003879	ENSG00000003402	CFLAR	CASH|CASP8AP1|CLARP|Casper|FLAME|FLAME-1|FLAME1|FLIP|I-FLICE|MRIT|c-FLIP|c-FLIPL|c-FLIPR|c-FLIPS|cFLIP	CASP8 and FADD like apoptosis regulator	protein-coding
MACS_peak_44236	chr2	201982473	201982866	+	113.54	NA	promoter-TSS (NR_147252)	promoter-TSS (NR_147252)	-545	NR_147255	8837	Hs.390736	NM_003879	ENSG00000003402	CFLAR	CASH|CASP8AP1|CLARP|Casper|FLAME|FLAME-1|FLAME1|FLIP|I-FLICE|MRIT|c-FLIP|c-FLIPL|c-FLIPR|c-FLIPS|cFLIP	CASP8 and FADD like apoptosis regulator	protein-coding
MACS_peak_66372	chr6	74161636	74162282	+	264.89	NA	promoter-TSS (NM_138441)	promoter-TSS (NM_138441)	61	NM_138441	115004	Hs.658405	NM_138441	ENSG00000164430	CGAS	C6orf150|MB21D1|h-cGAS	cyclic GMP-AMP synthase	protein-coding
MACS_peak_40774	chr19	49546994	49547162	+	62.01	NA	promoter-TSS (NM_033043)	promoter-TSS (NM_033043)	-27	NM_033043	93659	Hs.172944	NM_033043	ENSG00000189052	CGB5	CGB|HCG|hCGB	chorionic gonadotropin subunit beta 5	protein-coding
MACS_peak_40776	chr19	49559114	49559416	+	106.47	NA	promoter-TSS (NM_033142)	promoter-TSS (NM_033142)	-268	NM_033142	94027	Hs.681647	NM_033142	ENSG00000196337	CGB7	CG-beta-a|CGB6	chorionic gonadotropin subunit beta 7	protein-coding
MACS_peak_52720	chr3	88198657	88198805	+	57.83	NA	promoter-TSS (NM_173824)	promoter-TSS (NM_173824)	285	NM_001195308	8545	Hs.444818	NM_003663	ENSG00000163320	CGGBP1	CGGBP|p20-CGGBP	CGG triplet repeat binding protein 1	protein-coding
MACS_peak_20610	chr14	54976245	54976763	+	251.23	NA	promoter-TSS (NM_006568)	promoter-TSS (NM_006568)	-120	NM_006568	10668	Hs.59106	NM_006568	ENSG00000100532	CGRRF1	CGR19|RNF197	cell growth regulator with ring finger domain 1	protein-coding
MACS_peak_10966	chr10	90966998	90967197	+	54.85	NA	promoter-TSS (NM_003956)	promoter-TSS (NM_003956)	-23	NM_003956	9023	Hs.47357	NM_003956	ENSG00000138135	CH25H	C25H	cholesterol 25-hydroxylase	protein-coding
MACS_peak_37441	chr19	4402284	4402657	+	156.84	NA	promoter-TSS (NM_005483)	promoter-TSS (NM_005483)	-167	NM_005483	10036	Hs.79018	NM_005483	ENSG00000167670	CHAF1A	CAF-1|CAF1|CAF1B|CAF1P150|P150	chromatin assembly factor 1 subunit A	protein-coding
MACS_peak_20158	chr13	115079773	115079951	+	55.56	NA	promoter-TSS (NM_032436)	promoter-TSS (NM_032436)	-116	NM_001164144	283489	Hs.7542	NM_032436	ENSG00000198824	CHAMP1	C13orf8|CAMP|CHAMP|MRD40|ZNF828	chromosome alignment maintaining phosphoprotein 1	protein-coding
MACS_peak_10724	chr10	75541488	75541923	+	175.7	NA	promoter-TSS (NM_203298)	promoter-TSS (NM_203298)	-101	NM_203298	118487	Hs.181174	NM_203298	ENSG00000172586	CHCHD1	C10orf34|C2360|MRP-S37	coiled-coil-helix-coiled-coil-helix domain containing 1	protein-coding
MACS_peak_69265	chr7	56174087	56174475	+	130.85	NA	promoter-TSS (NM_016139)	promoter-TSS (NM_016139)	42	NM_001320327	51142	Hs.389996	NM_016139	ENSG00000106153	CHCHD2	C7orf17|MIX17B|MNRR1|NS2TP|PARK22	coiled-coil-helix-coiled-coil-helix domain containing 2	protein-coding
MACS_peak_71759	chr7	132766543	132767101	+	316.26	NA	promoter-TSS (NM_017812)	promoter-TSS (NM_017812)	28	NM_017812	54927	Hs.655010	NM_017812	ENSG00000106554	CHCHD3	MICOS19|MINOS3|Mic19|PPP1R22	coiled-coil-helix-coiled-coil-helix domain containing 3	protein-coding
MACS_peak_51074	chr3	14166284	14166448	+	52.3	NA	promoter-TSS (NM_144636)	promoter-TSS (NM_144636)	4	NM_144636	131474	Hs.517815	NM_144636	ENSG00000163528	CHCHD4	MIA40|TIMM40	coiled-coil-helix-coiled-coil-helix domain containing 4	protein-coding
MACS_peak_51073	chr3	14165599	14165846	+	66.63	NA	promoter-TSS (NM_024334)	promoter-TSS (NM_024334)	648	NM_144636	131474	Hs.517815	NM_144636	ENSG00000163528	CHCHD4	MIA40|TIMM40	coiled-coil-helix-coiled-coil-helix domain containing 4	protein-coding
MACS_peak_72951	chr8	57124485	57124704	+	80.94	NA	promoter-TSS (NM_001114634)	intron (NR_133936, intron 1 of 5)	246	NM_001011671	79145	Hs.436913	NM_024300	ENSG00000170791	CHCHD7	COX23	coiled-coil-helix-coiled-coil-helix domain containing 7	protein-coding
MACS_peak_6068	chr1	146644275	146644597	+	133.86	NA	promoter-TSS (NR_103870)	promoter-TSS (NR_103870)	110	NM_001348451	9557	Hs.191164	NM_004284	ENSG00000131778	CHD1L	ALC1|CHDL	chromodomain helicase DNA binding protein 1 like	protein-coding
MACS_peak_6069	chr1	146714670	146715059	+	146.78	NA	promoter-TSS (NM_001348452)	promoter-TSS (NM_001348452)	72	NM_001348452	9557	Hs.191164	NM_004284	ENSG00000131778	CHD1L	ALC1|CHDL	chromodomain helicase DNA binding protein 1 like	protein-coding
MACS_peak_30296	chr17	7790950	7791551	+	297.63	NA	promoter-TSS (NM_005852)	promoter-TSS (NM_005852)	-857	NM_005852	1107	Hs.25601	NM_005852	ENSG00000170004	CHD3	Mi-2a|Mi2-ALPHA|SNIBCPS|ZFH	chromodomain helicase DNA binding protein 3	protein-coding
MACS_peak_30293	chr17	7787447	7787604	+	50.54	NA	promoter-TSS (NM_001005271)	promoter-TSS (NM_001005271)	-589	NM_001005271	1107	Hs.25601	NM_005852	ENSG00000170004	CHD3	Mi-2a|Mi2-ALPHA|SNIBCPS|ZFH	chromodomain helicase DNA binding protein 3	protein-coding
MACS_peak_16326	chr12	6716328	6716659	+	119.28	NA	promoter-TSS (NM_001297553)	promoter-TSS (NM_001297553)	52	NM_001363606	1108	Hs.162233	NM_001273	ENSG00000111642	CHD4	CHD-4|Mi-2b|Mi2-BETA|SIHIWES	chromodomain helicase DNA binding protein 4	protein-coding
MACS_peak_46115	chr20	40246967	40247170	+	66.3	NA	promoter-TSS (NM_032221)	promoter-TSS (NM_032221)	-52	NM_032221	84181	Hs.740645	NM_032221	ENSG00000124177	CHD6	CHD-6|CHD5|RIGB	chromodomain helicase DNA binding protein 6	protein-coding
MACS_peak_20198	chr14	21905333	21905682	+	116.33	NA	promoter-TSS (NM_020920)	promoter-TSS (NM_020920)	-73	NM_020920	57680	Hs.530698	NM_020920	ENSG00000100888	CHD8	AUTS18|HELSNF1	chromodomain helicase DNA binding protein 8	protein-coding
MACS_peak_28444	chr16	53088580	53089039	+	195.57	NA	promoter-TSS (NM_025134)	promoter-TSS (NM_025134)	-94	NM_025134	80205	Hs.59159	NM_015287	ENSG00000177200	CHD9	AD013|CHD-9|CReMM|KISH2|PRIC320	chromodomain helicase DNA binding protein 9	protein-coding
MACS_peak_15970	chr11	125495751	125496376	+	287.7	NA	promoter-TSS (NM_001330428)	promoter-TSS (NM_001330428)	-56	NM_001330428	1111	Hs.24529	NM_001274	ENSG00000149554	CHEK1	CHK1	checkpoint kinase 1	protein-coding
MACS_peak_15969	chr11	125495385	125495731	+	118.34	NA	promoter-TSS (NM_001330428)	promoter-TSS (NM_001330428)	239	NM_001330427	1111	Hs.24529	NM_001274	ENSG00000149554	CHEK1	CHK1	checkpoint kinase 1	protein-coding
MACS_peak_38872	chr19	16652583	16653720	+	458.62	NA	promoter-TSS (NM_006387)	promoter-TSS (NM_006387)	97	NM_006387	10523	Hs.740364	NM_006387	ENSG00000085872	CHERP	DAN16|SCAF6|SRA1	calcium homeostasis endoplasmic reticulum protein	protein-coding
MACS_peak_38873	chr19	16653749	16653917	+	61.33	NA	promoter-TSS (NM_006387)	promoter-TSS (NM_006387)	-585	NM_006387	10523	Hs.740364	NM_006387	ENSG00000085872	CHERP	DAN16|SCAF6|SRA1	calcium homeostasis endoplasmic reticulum protein	protein-coding
MACS_peak_19336	chr12	133464184	133464337	+	56.12	NA	promoter-TSS (NM_001161344)	promoter-TSS (NM_001161344)	-56	NM_001161345	55743	Hs.720197	NM_018223	ENSG00000072609	CHFR	RNF116|RNF196	checkpoint with forkhead and ring finger domains	protein-coding
MACS_peak_14858	chr11	67889343	67889845	+	229.3	NA	promoter-TSS (NM_001277)	promoter-TSS (NM_001277)	-736	NM_212469	1119	Hs.77221	NM_001277	ENSG00000110721	CHKA	CHK|CK|CKI|EK	choline kinase alpha	protein-coding
MACS_peak_14857	chr11	67889137	67889335	+	65.17	NA	promoter-TSS (NM_001277)	promoter-TSS (NM_001277)	-378	NM_212469	1119	Hs.77221	NM_001277	ENSG00000110721	CHKA	CHK|CK|CKI|EK	choline kinase alpha	protein-coding
MACS_peak_50661	chr22	51020999	51021652	+	334.18	NA	promoter-TSS (NR_021492)	promoter-TSS (NR_021492)	103	NM_005198	1120	Hs.654827	NM_005198	ENSG00000100288	CHKB	CHETK|CHKL|CK|CKB|CKEKB|EK|EKB|MDCMC	choline kinase beta	protein-coding
MACS_peak_36080	chr18	11851299	11851660	+	126.62	NA	promoter-TSS (NM_020412)	promoter-TSS (NM_020412)	67	NM_020412	57132	Hs.656244	NM_020412	ENSG00000255112	CHMP1B	C10orf2|C18-ORF2|C18orf2|CHMP1.5|Vps46-2|Vps46B|hVps46-2	charged multivesicular body protein 1B	protein-coding
MACS_peak_41287	chr19	59066240	59066881	+	243.4	NA	promoter-TSS (NM_198426)	promoter-TSS (NM_198426)	-88	NM_198426	27243	Hs.12107	NM_014453	ENSG00000130724	CHMP2A	BC-2|BC2|CHMP2|VPS2|VPS2A	charged multivesicular body protein 2A	protein-coding
MACS_peak_52713	chr3	87276106	87276562	+	217.94	NA	promoter-TSS (NM_014043)	promoter-TSS (NM_014043)	-125	NM_014043	25978	Hs.476930	NM_014043	ENSG00000083937	CHMP2B	ALS17|CHMP2.5|DMT1|VPS2-2|VPS2B	charged multivesicular body protein 2B	protein-coding
MACS_peak_45662	chr20	32398846	32399235	+	185.73	NA	promoter-TSS (NR_110623)	promoter-TSS (NR_110623)	-114	NM_176812	128866	Hs.472471	NM_176812	ENSG00000101421	CHMP4B	C20orf178|CHMP4A|CTPP3|CTRCT31|SNF7|SNF7-2|Shax1|VPS32B|Vps32-2|dJ553F4.4	charged multivesicular body protein 4B	protein-coding
MACS_peak_73201	chr8	82644573	82644963	+	124.93	NA	promoter-TSS (NM_152284)	promoter-TSS (NM_152284)	85	NM_152284	92421	Hs.183861	NM_152284	ENSG00000164695	CHMP4C	SNF7-3|Shax3|VPS32C	charged multivesicular body protein 4C	protein-coding
MACS_peak_75781	chr9	33264766	33265481	+	233.25	NA	promoter-TSS (NM_001349286)	promoter-TSS (NM_001349286)	76	NM_016410	51510	Hs.635313	NM_016410	ENSG00000086065	CHMP5	C9orf83|CGI-34|HSPC177|PNAS-2|SNF7DC2|Vps60	charged multivesicular body protein 5	protein-coding
MACS_peak_15708	chr11	89955594	89956653	+	492.1	NA	promoter-TSS (NM_012124)	promoter-TSS (NM_012124)	94	NM_012124	26973	Hs.22857	NM_012124	ENSG00000110172	CHORDC1	CHP1	cysteine and histidine rich domain containing 1	protein-coding
MACS_peak_22374	chr15	41523176	41523997	+	286.49	NA	promoter-TSS (NM_001286441)	promoter-TSS (NM_001286441)	120	NM_007236	11261	Hs.406234	NM_007236	ENSG00000187446	CHP1	CHP|SLC9A1BP|SPAX9|Sid470p|p22|p24	calcineurin like EF-hand protein 1	protein-coding
MACS_peak_44830	chr2	220407808	220408097	+	89.63	NA	promoter-TSS (NM_001195731)	promoter-TSS (NM_001195731)	-133	NM_001195731	79586	Hs.516711	NM_024536	ENSG00000123989	CHPF	CHSY2|CSS2	chondroitin polymerizing factor	protein-coding
MACS_peak_74138	chr8	141520795	141521927	+	524.76	NA	promoter-TSS (NM_017444)	promoter-TSS (NM_017444)	-36	NR_023360	54108	Hs.279704	NM_017444	ENSG00000104472	CHRAC1	CHARC1|CHARC15|CHRAC-1|CHRAC-15|CHRAC15|YCL1	chromatin accessibility complex subunit 1	protein-coding
MACS_peak_74137	chr8	141520419	141520774	+	115.96	NA	promoter-TSS (NM_017444)	promoter-TSS (NM_017444)	-801	NR_023360	54108	Hs.279704	NM_017444	ENSG00000104472	CHRAC1	CHARC1|CHARC15|CHRAC-1|CHRAC-15|CHRAC15|YCL1	chromatin accessibility complex subunit 1	protein-coding
MACS_peak_45077	chr2	233404303	233404454	+	56.8	NA	promoter-TSS (NM_005199)	promoter-TSS (NM_005199)	-24	NM_005199	1146	Hs.248101	NM_005199	ENSG00000196811	CHRNG	ACHRG	cholinergic receptor nicotinic gamma subunit	protein-coding
MACS_peak_43900	chr2	179278238	179278405	+	58.17	NA	promoter-TSS (NR_110206)	promoter-TSS (NR_110206)	-65	NR_110204	101927027	Hs.715694	NR_110204	ENSG00000223960	CHROMR	CHROME|PRKRA-AS1	cholesterol induced regulator of metabolism RNA	ncRNA
MACS_peak_18494	chr12	104850349	104850750	+	133.15	NA	promoter-TSS (NM_001173982)	promoter-TSS (NM_001173982)	-177	NM_001173982	50515	Hs.17569	NM_018413	ENSG00000171310	CHST11	C4ST|C4ST-1|C4ST1|HSA269537|OCBMD	carbohydrate sulfotransferase 11	protein-coding
MACS_peak_67716	chr7	2442808	2443015	+	76.97	NA	promoter-TSS (NM_018641)	promoter-TSS (NM_018641)	-335	NM_001243794	55501	Hs.288853	NM_018641	ENSG00000136213	CHST12	C4S-2|C4ST-2|C4ST2	carbohydrate sulfotransferase 12	protein-coding
MACS_peak_62591	chr5	129239488	129239813	+	98.33	NA	promoter-TSS (NM_175856)	promoter-TSS (NM_175856)	-508	NM_175856	337876	Hs.213137	NM_175856	ENSG00000198108	CHSY3	CHSY2|CSS3	chondroitin sulfate synthase 3	protein-coding
MACS_peak_6548	chr1	153606400	153606788	+	132.15	NA	promoter-TSS (NM_015607)	promoter-TSS (NM_015607)	52	NM_015607	26097	Hs.611057	NM_015607	ENSG00000160679	CHTOP	C10orf77|C1orf77|FL-SRAG|FOP|SRAG|SRAG-3|SRAG-5|pp7704	chromatin target of PRMT1	protein-coding
MACS_peak_6547	chr1	153606015	153606385	+	93.99	NA	promoter-TSS (NM_001244664)	promoter-TSS (NM_001244664)	-258	NM_001244664	26097	Hs.611057	NM_015607	ENSG00000160679	CHTOP	C10orf77|C1orf77|FL-SRAG|FOP|SRAG|SRAG-3|SRAG-5|pp7704	chromatin target of PRMT1	protein-coding
MACS_peak_11176	chr10	101989099	101989513	+	135.46	NA	promoter-TSS (NM_001278)	promoter-TSS (NM_001278)	47	NM_001278	1147	Hs.198998	NM_001278	ENSG00000213341	CHUK	IKBKA|IKK-alpha|IKK1|IKKA|NFKBIKA|TCF16	component of inhibitor of nuclear factor kappa B kinase complex	protein-coding
MACS_peak_20769	chr14	65380996	65381300	+	105.8	NA	promoter-TSS (NM_001204064)	promoter-TSS (NM_001204064)	-25	NM_001202558	100529261	Hs.325531	NM_001202558	ENSG00000125954	CHURC1-FNTB	FNTB|FTase-beta	CHURC1-FNTB readthrough	protein-coding
MACS_peak_28631	chr16	66967831	66968002	+	50.48	NA	promoter-TSS (NM_003869)	promoter-TSS (NM_003869)	389	NR_046109	51647	Hs.9825	NM_016062	ENSG00000166595	CIAO2B	CGI-128|CIA2B|FAM96B|MIP18	cytosolic iron-sulfur assembly component 2B	protein-coding
MACS_peak_25688	chr16	790780	791233	+	254.14	NA	promoter-TSS (NM_001304799)	promoter-TSS (NM_001304799)	-9	NM_022493	64428	Hs.513247	NM_022493	ENSG00000103245	CIAO3	HPRN|IOP1|LET1L|NAR1|NARFL|PRN	cytosolic iron-sulfur assembly component 3	protein-coding
MACS_peak_28524	chr16	57481213	57481672	+	146.97	NA	promoter-TSS (NM_001308347)	promoter-TSS (NM_001308347)	-2	NM_001308347	57019	Hs.4900	NM_020313	ENSG00000005194	CIAPIN1	Anamorsin|CIAE2|DRE2|PRO0915	cytokine induced apoptosis inhibitor 1	protein-coding
MACS_peak_6297	chr1	150254264	150254673	+	114.55	NA	promoter-TSS (NM_001300838)	promoter-TSS (NM_001300838)	-496	NM_001300838	148523	Hs.54680	NM_144697	ENSG00000159208	CIART	C1orf51|CHRONO|GM129	circadian associated repressor of transcription	protein-coding
MACS_peak_25002	chr15	90809332	90809727	+	138.95	NA	promoter-TSS (NR_102428)	promoter-TSS (NR_102428)	-538	NR_102428	10519	Hs.715556	NM_006384	ENSG00000185043	CIB1	CIB|CIBP|KIP1|PRKDCIP|SIP2-28	calcium and integrin binding 1	protein-coding
MACS_peak_24995	chr15	90776446	90776835	+	111.55	NA	promoter-TSS (NM_001013657)	promoter-TSS (NM_001013657)	533	NM_006384	10519	Hs.715556	NM_006384	ENSG00000185043	CIB1	CIB|CIBP|KIP1|PRKDCIP|SIP2-28	calcium and integrin binding 1	protein-coding
MACS_peak_24996	chr15	90776894	90777184	+	105.38	NA	promoter-TSS (NM_001013657)	promoter-TSS (NM_001013657)	134	NM_006384	10519	Hs.715556	NM_006384	ENSG00000185043	CIB1	CIB|CIBP|KIP1|PRKDCIP|SIP2-28	calcium and integrin binding 1	protein-coding
MACS_peak_39963	chr19	42772119	42773021	+	282.1	NA	promoter-TSS (NM_001304815)	promoter-TSS (NM_001304815)	-119	NM_001304815	23152	Hs.388236	NM_015125	ENSG00000079432	CIC	MRD45	capicua transcriptional repressor	protein-coding
MACS_peak_50869	chr3	9921552	9921925	+	72.84	NA	promoter-TSS (NM_022094)	promoter-TSS (NM_022094)	199	NM_001321144	63924	Hs.567562	NM_022094	ENSG00000187288	CIDEC	CIDE-3|CIDE3|FPLD5|FSP27	cell death inducing DFFA like effector c	protein-coding
MACS_peak_50870	chr3	9922596	9922990	+	97.65	NA	promoter-TSS (NM_001321142)	promoter-TSS (NM_001321142)	-855	NM_001199551	63924	Hs.567562	NM_022094	ENSG00000187288	CIDEC	CIDE-3|CIDE3|FPLD5|FSP27	cell death inducing DFFA like effector c	protein-coding
MACS_peak_52811	chr3	108308186	108308660	+	189.14	NA	promoter-TSS (NM_020890)	promoter-TSS (NM_020890)	-138	NM_020890	57650	Hs.591308	NM_020890	ENSG00000163507	CIP2A	KIAA1524|p90	cell proliferation regulating inhibitor of protein phosphatase 2A	protein-coding
MACS_peak_52810	chr3	108308003	108308176	+	63.11	NA	promoter-TSS (NM_014648)	promoter-TSS (NM_014648)	196	NM_020890	57650	Hs.591308	NM_020890	ENSG00000163507	CIP2A	KIAA1524|p90	cell proliferation regulating inhibitor of protein phosphatase 2A	protein-coding
MACS_peak_21071	chr14	77564104	77564664	+	238.97	NA	promoter-TSS (NM_033426)	promoter-TSS (NM_033426)	-217	NM_033426	85457	Hs.709066	NM_033426	ENSG00000198894	CIPC	KIAA1737	CLOCK interacting pacemaker	protein-coding
MACS_peak_43848	chr2	175260031	175260714	+	246.39	NA	promoter-TSS (NM_004882)	promoter-TSS (NM_004882)	68	NM_004882	9541	Hs.632531	NM_004882	ENSG00000138433	CIR1	CIR	corepressor interacting with RBPJ, 1	protein-coding
MACS_peak_36913	chr19	1268846	1269009	+	52.89	NA	promoter-TSS (NM_001300815)	promoter-TSS (NM_001300815)	-340	NM_001280	1153	Hs.618145	NM_001280	ENSG00000099622	CIRBP	CIRP	cold inducible RNA binding protein	protein-coding
MACS_peak_36914	chr19	1269174	1269343	+	51.07	NA	promoter-TSS (NM_001300815)	promoter-TSS (NM_001300815)	-9	NM_001280	1153	Hs.618145	NM_001280	ENSG00000099622	CIRBP	CIRP	cold inducible RNA binding protein	protein-coding
MACS_peak_10432	chr10	60028725	60028982	+	101.81	NA	promoter-TSS (NM_018464)	promoter-TSS (NM_018464)	-69	NM_018464	55847	Hs.370102	NM_018464	ENSG00000122873	CISD1	C10orf70|MDS029|ZCD1|mitoNEET	CDGSH iron sulfur domain 1	protein-coding
MACS_peak_55306	chr4	103790166	103790515	+	104.31	NA	promoter-TSS (NM_181893)	promoter-TSS (NM_181893)	191	NM_001008388	493856	Hs.444955	NM_001008388	ENSG00000145354	CISD2	ERIS|Miner1|NAF-1|WFS2|ZCD2	CDGSH iron sulfur domain 2	protein-coding
MACS_peak_31931	chr17	36885664	36885808	+	59.26	NA	promoter-TSS (NM_001136498)	promoter-TSS (NM_001136498)	-858	NM_001136498	284106	Hs.713595	NM_001136498	ENSG00000277972	CISD3	MiNT|Miner2	CDGSH iron sulfur domain 3	protein-coding
MACS_peak_18832	chr12	120314980	120315175	+	62.33	NA	promoter-TSS (NM_007174)	promoter-TSS (NM_007174)	47	NM_001206999	11113	Hs.119594	NM_007174	ENSG00000122966	CIT	CITK|CRIK|MCPH17|STK21	citron rho-interacting serine/threonine kinase	protein-coding
MACS_peak_66955	chr6	139695462	139695723	+	86.91	NA	promoter-TSS (NM_001168389)	promoter-TSS (NM_001168389)	-93	NM_001168388	10370	Hs.82071	NM_006079	ENSG00000164442	CITED2	ASD8|MRG-1|MRG1|P35SRJ|VSD2	Cbp/p300 interacting transactivator with Glu/Asp rich carboxy-terminal domain 2	protein-coding
MACS_peak_66956	chr6	139695725	139695946	+	64.94	NA	promoter-TSS (NM_001168389)	promoter-TSS (NM_001168389)	-50	NM_006079	10370	Hs.82071	NM_006079	ENSG00000164442	CITED2	ASD8|MRG-1|MRG1|P35SRJ|VSD2	Cbp/p300 interacting transactivator with Glu/Asp rich carboxy-terminal domain 2	protein-coding
MACS_peak_66957	chr6	139696151	139696691	+	242.05	NA	promoter-TSS (NM_001168388)	promoter-TSS (NM_001168388)	-636	NM_006079	10370	Hs.82071	NM_006079	ENSG00000164442	CITED2	ASD8|MRG-1|MRG1|P35SRJ|VSD2	Cbp/p300 interacting transactivator with Glu/Asp rich carboxy-terminal domain 2	protein-coding
MACS_peak_78458	chr9	130953811	130954246	+	158.26	NA	promoter-TSS (NM_001257976)	promoter-TSS (NM_001257976)	-177	NM_001257976	25792	Hs.212395	NM_012127	ENSG00000148337	CIZ1	LSFR1|NP94|ZNF356	CDKN1A interacting zinc finger protein 1	protein-coding
MACS_peak_78459	chr9	130954933	130955757	+	255.26	NA	promoter-TSS (NM_001257975)	promoter-TSS (NM_001257975)	-962	NM_001257975	25792	Hs.212395	NM_012127	ENSG00000148337	CIZ1	LSFR1|NP94|ZNF356	CDKN1A interacting zinc finger protein 1	protein-coding
MACS_peak_78464	chr9	130966158	130966843	+	215.82	NA	promoter-TSS (NM_001131015)	promoter-TSS (NM_001131015)	1	NM_012127	25792	Hs.212395	NM_012127	ENSG00000148337	CIZ1	LSFR1|NP94|ZNF356	CDKN1A interacting zinc finger protein 1	protein-coding
MACS_peak_18530	chr12	106642383	106642534	+	56.8	NA	promoter-TSS (NM_006825)	promoter-TSS (NM_006825)	-660	NM_006825	10970	Hs.74368	NM_006825	ENSG00000136026	CKAP4	CLIMP-63|ERGIC-63|p63	cytoskeleton associated protein 4	protein-coding
MACS_peak_12860	chr11	46867701	46868011	+	143.6	NA	promoter-TSS (NR_038909)	promoter-TSS (NR_038909)	3	NM_014756	9793	Hs.201253	NM_014756	ENSG00000175216	CKAP5	CHTOG|MSPS|TOG|TOGp|ch-TOG	cytoskeleton associated protein 5	protein-coding
MACS_peak_12859	chr11	46867155	46867392	+	97.95	NA	promoter-TSS (NR_038909)	promoter-TSS (NR_038909)	558	NM_001008938	9793	Hs.201253	NM_014756	ENSG00000175216	CKAP5	CHTOG|MSPS|TOG|TOGp|ch-TOG	cytoskeleton associated protein 5	protein-coding
MACS_peak_28604	chr16	66586091	66586645	+	229.32	NA	promoter-TSS (NM_181640)	promoter-TSS (NM_181640)	-98	NM_181641	51192	Hs.15159	NM_016326	ENSG00000217555	CKLF	C32|CKLF1|CKLF2|CKLF3|CKLF4|HSPC224|UCK-1	chemokine like factor	protein-coding
MACS_peak_22565	chr15	43985489	43985939	+	171.03	NA	promoter-TSS (NR_135856)	promoter-TSS (NR_135856)	83	NM_001321928	548596	Hs.654988	NM_001015001	ENSG00000223572	CKMT1A	CKMT1|U-MtCK|mia-CK	creatine kinase, mitochondrial 1A	protein-coding
MACS_peak_22556	chr15	43885709	43886123	+	138.19	NA	promoter-TSS (NR_135748)	promoter-TSS (NR_135748)	-116	NR_135749	1159	Hs.741420	NM_020990	ENSG00000237289	CKMT1B	CKMT|CKMT1|UMTCK	creatine kinase, mitochondrial 1B	protein-coding
MACS_peak_6705	chr1	154946638	154947627	+	490.71	NA	promoter-TSS (NM_001826)	promoter-TSS (NM_001826)	14	NR_024163	1163	Hs.374378	NM_001826	ENSG00000173207	CKS1B	CKS1|PNAS-16|PNAS-18|ckshs1	CDC28 protein kinase regulatory subunit 1B	protein-coding
MACS_peak_76606	chr9	91926475	91926680	+	65.67	NA	promoter-TSS (NR_036108)	promoter-TSS (NR_036108)	467	NM_001827	1164	Hs.83758	NM_001827	ENSG00000123975	CKS2	CKSHS2	CDC28 protein kinase regulatory subunit 2	protein-coding
MACS_peak_76604	chr9	91925605	91925951	+	187.49	NA	promoter-TSS (NM_001827)	promoter-TSS (NM_001827)	-332	NM_001827	1164	Hs.83758	NM_001827	ENSG00000123975	CKS2	CKSHS2	CDC28 protein kinase regulatory subunit 2	protein-coding
MACS_peak_76605	chr9	91925990	91926242	+	103.66	NA	promoter-TSS (NM_001827)	promoter-TSS (NM_001827)	6	NM_001827	1164	Hs.83758	NM_001827	ENSG00000123975	CKS2	CKSHS2	CDC28 protein kinase regulatory subunit 2	protein-coding
MACS_peak_43327	chr2	122406867	122407266	+	133.81	NA	promoter-TSS (NR_037858)	promoter-TSS (NR_037858)	-28	NM_015282	23332	Hs.469840	NM_015282	ENSG00000074054	CLASP1	MAST1	cytoplasmic linker associated protein 1	protein-coding
MACS_peak_40137	chr19	45542207	45542399	+	56.87	NA	promoter-TSS (NM_007056)	promoter-TSS (NM_007056)	0	NR_103529	11129	Hs.466917	NM_007056	ENSG00000104859	CLASRP	CLASP|SFRS16|SWAP2	CLK4 associating serine/arginine rich protein	protein-coding
MACS_peak_14685	chr11	67141457	67142333	+	404.16	NA	promoter-TSS (NM_001166212)	promoter-TSS (NM_001166212)	-247	NM_001166212	23529	Hs.502977	NM_013246	ENSG00000175505	CLCF1	BSF-3|BSF3|CISS2|CLC|NNT-1|NNT1|NR6	cardiotrophin like cytokine factor 1	protein-coding
MACS_peak_53856	chr3	184079125	184079292	+	51.67	NA	promoter-TSS (NM_001278700)	promoter-TSS (NM_001278700)	185	NM_001171087	1181	Hs.436847	NM_004366	ENSG00000114859	CLCN2	CIC-2|CLC2|ECA2|ECA3|EGI11|EGI3|EGMA|EJM6|EJM8|HALD2|LKPAT|clC-2	chloride voltage-gated channel 2	protein-coding
MACS_peak_55865	chr4	170541194	170541894	+	308.18	NA	promoter-TSS (NM_001829)	promoter-TSS (NM_001829)	-185	NM_173872	1182	Hs.481186	NM_001829	ENSG00000109572	CLCN3	CLC3|ClC-3	chloride voltage-gated channel 3	protein-coding
MACS_peak_1349	chr1	11865473	11866545	+	640.87	NA	promoter-TSS (NR_046428)	promoter-TSS (NR_046428)	-144	NM_001256959	1185	Hs.193043	NM_001286	ENSG00000011021	CLCN6	CLC-6	chloride voltage-gated channel 6	protein-coding
MACS_peak_1348	chr1	11865176	11865382	+	55.63	NA	promoter-TSS (NR_046428)	promoter-TSS (NR_046428)	-874	NM_001256959	1185	Hs.193043	NM_001286	ENSG00000011021	CLCN6	CLC-6	chloride voltage-gated channel 6	protein-coding
MACS_peak_1646	chr1	16374607	16374768	+	59.63	NA	promoter-TSS (NM_001165945)	promoter-TSS (NM_001165945)	-570	NM_001165945	1188	Hs.352243	NM_000085	ENSG00000184908	CLCNKB	CLCKB|ClC-K2|ClC-Kb	chloride voltage-gated channel Kb	protein-coding
MACS_peak_1647	chr1	16374934	16375081	+	50.79	NA	promoter-TSS (NM_001165945)	promoter-TSS (NM_001165945)	-250	NM_001165945	1188	Hs.352243	NM_000085	ENSG00000184908	CLCNKB	CLCKB|ClC-K2|ClC-Kb	chloride voltage-gated channel Kb	protein-coding
MACS_peak_1644	chr1	16369165	16369489	+	126.82	NA	promoter-TSS (NM_000085)	promoter-TSS (NM_000085)	-904	NM_000085	1188	Hs.352243	NM_000085	ENSG00000184908	CLCNKB	CLCKB|ClC-K2|ClC-Kb	chloride voltage-gated channel Kb	protein-coding
MACS_peak_48434	chr21	37949271	37949421	+	50.46	NA	promoter-TSS (NM_001146077)	promoter-TSS (NM_001146077)	-479	NM_001146077	23562	Hs.660278	NM_012130	ENSG00000159261	CLDN14	DFNB29	claudin 14	protein-coding
MACS_peak_69697	chr7	73244864	73245377	+	186.28	NA	promoter-TSS (NM_001305)	promoter-TSS (NM_001305)	-73	NM_001305	1364	Hs.647036	NM_001305	ENSG00000189143	CLDN4	CPE-R|CPER|CPETR|CPETR1|WBSCR8|hCPE-R	claudin 4	protein-coding
MACS_peak_30158	chr17	7166370	7166635	+	98.95	NA	promoter-TSS (NM_001307)	promoter-TSS (NM_001307)	10	NM_001185022	1366	Hs.513915	NM_001307	ENSG00000181885	CLDN7	CEPTRL2|CLDN-7|CPETRL2|Hs.84359|claudin-1	claudin 7	protein-coding
MACS_peak_26770	chr16	11038122	11038729	+	282.98	NA	promoter-TSS (NM_015226)	promoter-TSS (NM_015226)	4	NM_015226	23274	Hs.35490	NM_015226	ENSG00000038532	CLEC16A	Gop-1|KIAA0350	C-type lectin domain containing 16A	protein-coding
MACS_peak_65667	chr6	31704158	31704357	+	55.7	NA	promoter-TSS (NM_001287594)	promoter-TSS (NM_001287594)	65	NM_001287594	1192	Hs.414565	NM_001288	ENSG00000213719	CLIC1	CL1C1|G6|NCC27	chloride intracellular channel 1	protein-coding
MACS_peak_2673	chr1	25071201	25072051	+	322.65	NA	promoter-TSS (NM_013943)	promoter-TSS (NM_013943)	-312	NM_013943	25932	Hs.440544	NM_013943	ENSG00000169504	CLIC4	CLIC4L|H1|MTCLIC|huH1|p64H1	chloride intracellular channel 4	protein-coding
MACS_peak_63848	chr5	157286039	157286376	+	120.93	NA	promoter-TSS (NM_001195555)	promoter-TSS (NM_001195555)	-54	NM_014666	9685	Hs.644000	NM_014666	ENSG00000113282	CLINT1	CLINT|ENTH|EPN4|EPNR	clathrin interactor 1	protein-coding
MACS_peak_19025	chr12	122907957	122908156	+	81.17	NA	promoter-TSS (NM_002956)	promoter-TSS (NM_002956)	-840	NM_198240	6249	Hs.524809	NM_002956	ENSG00000130779	CLIP1	CLIP|CLIP-170|CLIP170|CYLN1|RSN	CAP-Gly domain containing linker protein 1	protein-coding
MACS_peak_69821	chr7	73703510	73703645	+	51.93	NA	promoter-TSS (NM_032421)	promoter-TSS (NM_032421)	-160	NM_032421	7461	Hs.647018	NM_003388	ENSG00000106665	CLIP2	CLIP|CLIP-115|CYLN2|WBSCR3|WBSCR4|WSCR3|WSCR4	CAP-Gly domain containing linker protein 2	protein-coding
MACS_peak_44216	chr2	201730181	201730397	+	54	NA	promoter-TSS (NR_027855)	promoter-TSS (NR_027855)	-908	NR_027855	1195	Hs.433732	NM_004071	ENSG00000013441	CLK1	CLK|CLK/STY|STY	CDC like kinase 1	protein-coding
MACS_peak_24003	chr15	74907222	74907499	+	78.58	NA	promoter-TSS (NM_001130028)	promoter-TSS (NM_001130028)	25	NM_001130028	1198	Hs.511790	NM_001292	ENSG00000179335	CLK3	PHCLK3|PHCLK3/152	CDC like kinase 3	protein-coding
MACS_peak_72093	chr8	1711856	1712027	+	50.48	NA	promoter-TSS (NR_134302)	promoter-TSS (NR_134302)	71	NM_018941	2055	Hs.127675	NM_018941	ENSG00000182372	CLN8	C8orf61|EPMR|TLCD6	CLN8 transmembrane ER and ERGIC protein	protein-coding
MACS_peak_54953	chr4	56413239	56413382	+	66.78	NA	promoter-TSS (NM_004898)	promoter-TSS (NM_004898)	-234	NM_004898	9575	Hs.436975	NM_004898	ENSG00000134852	CLOCK	KAT13D|bHLHe8	clock circadian regulator	protein-coding
MACS_peak_54952	chr4	56412149	56412318	+	51.07	NA	promoter-TSS (NM_001267843)	promoter-TSS (NM_001267843)	-134	NM_001267843	9575	Hs.436975	NM_004898	ENSG00000134852	CLOCK	KAT13D|bHLHe8	clock circadian regulator	protein-coding
MACS_peak_13281	chr11	57424903	57425516	+	338.35	NA	promoter-TSS (NM_001142597)	promoter-TSS (NM_001142597)	-7	NM_001142597	10978	Hs.523687	NM_006831	ENSG00000172409	CLP1	HEAB|hClp1	cleavage and polyadenylation factor I subunit 1	protein-coding
MACS_peak_56876	chr5	1345115	1346321	+	458.2	NA	promoter-TSS (NM_030782)	promoter-TSS (NM_030782)	-504	NM_030782	81037	Hs.444673	NM_030782	ENSG00000049656	CLPTM1L	CRR9	CLPTM1 like	protein-coding
MACS_peak_23234	chr15	65478470	65478699	+	84.21	NA	promoter-TSS (NR_133680)	promoter-TSS (NR_133680)	-904	NM_006660	10845	Hs.113823	NM_006660	ENSG00000166855	CLPX	EPP2	caseinolytic mitochondrial matrix peptidase chaperone subunit	protein-coding
MACS_peak_1130	chr1	9885235	9885737	+	149.02	NA	promoter-TSS (NM_001009566)	promoter-TSS (NM_001009566)	-902	NM_001009566	22883	Hs.29665	NM_014944	ENSG00000171603	CLSTN1	ALC-ALPHA|CDHR12|CST-1|CSTN1|PIK3CD|XB31alpha|alcalpha1|alcalpha2	calsyntenin 1	protein-coding
MACS_peak_16423	chr12	7282942	7283089	+	53.36	NA	promoter-TSS (NM_001329454)	promoter-TSS (NM_001329454)	48	NM_014718	9746	Hs.535378	NM_014718	ENSG00000139182	CLSTN3	CDHR14|CSTN3|alcbeta	calsyntenin 3	protein-coding
MACS_peak_33739	chr17	57696545	57697590	+	701.88	NA	promoter-TSS (NM_001288653)	promoter-TSS (NM_001288653)	17	NM_001288653	1213	Hs.491351	NM_004859	ENSG00000141367	CLTC	CHC|CHC17|CLH-17|CLTCL2|Hc|MRD56	clathrin heavy chain	protein-coding
MACS_peak_72538	chr8	27468669	27468793	+	63.63	NA	promoter-TSS (NR_106902)	promoter-TSS (NR_106902)	223	NR_038335	1191	Hs.436657	NM_001831	ENSG00000120885	CLU	AAG4|APO-J|APOJ|CLI|CLU1|CLU2|KUB1|NA1/NA2|SGP-2|SGP2|SP-40|TRPM-2|TRPM2	clusterin	protein-coding
MACS_peak_72539	chr8	27470118	27470347	+	91.14	NA	promoter-TSS (NR_045494)	promoter-TSS (NR_045494)	-964	NR_045494	1191	Hs.436657	NM_001831	ENSG00000120885	CLU	AAG4|APO-J|APOJ|CLI|CLU1|CLU2|KUB1|NA1/NA2|SGP-2|SGP2|SP-40|TRPM-2|TRPM2	clusterin	protein-coding
MACS_peak_72540	chr8	27471742	27472559	+	392.01	NA	promoter-TSS (NM_001831)	promoter-TSS (NM_001831)	67	NM_001831	1191	Hs.436657	NM_001831	ENSG00000120885	CLU	AAG4|APO-J|APOJ|CLI|CLU1|CLU2|KUB1|NA1/NA2|SGP-2|SGP2|SP-40|TRPM-2|TRPM2	clusterin	protein-coding
MACS_peak_29799	chr17	2615008	2615302	+	102.5	NA	promoter-TSS (NM_001366661)	promoter-TSS (NM_001366661)	-97	NM_015229	23277	Hs.22616	NM_015229	ENSG00000132361	CLUH	CLU1	clustered mitochondria homolog	protein-coding
MACS_peak_28348	chr16	31711783	31712027	+	106.7	NA	promoter-TSS (NR_024034)	promoter-TSS (NR_024034)	-29	NR_024034	100132341	Hs.715792	NM_024048	ENSG00000131797	CLUHP3	C16orf67|KIAA0664L3|KIAA0664P3|URLC3	clustered mitochondria homolog pseudogene 3	pseudo
MACS_peak_19871	chr13	100258472	100258717	+	127.93	NA	promoter-TSS (NM_206808)	promoter-TSS (NM_206808)	-324	NM_206808	171425	Hs.655642	NM_206808	ENSG00000125246	CLYBL	CLB	citrate lyase beta like	protein-coding
MACS_peak_51300	chr3	28282976	28283426	+	213.98	NA	promoter-TSS (NM_001331185)	promoter-TSS (NM_001331185)	91	NR_138585	152100	Hs.444724	NM_182523	ENSG00000187118	CMC1	C3orf68	C-X9-C motif containing 1	protein-coding
MACS_peak_29019	chr16	81040793	81041302	+	192.68	NA	promoter-TSS (NR_147838)	promoter-TSS (NR_147838)	-523	NR_147841	56942	Hs.55028	NM_020188	ENSG00000103121	CMC2	2310061C15Rik|C16orf61|DC13	C-X9-C motif containing 2	protein-coding
MACS_peak_29018	chr16	81040384	81040655	+	110.63	NA	promoter-TSS (NR_147838)	promoter-TSS (NR_147838)	5	NR_147838	56942	Hs.55028	NM_020188	ENSG00000103121	CMC2	2310061C15Rik|C16orf61|DC13	C-X9-C motif containing 2	protein-coding
MACS_peak_28606	chr16	66637296	66637463	+	51.36	NA	promoter-TSS (NM_001363918)	promoter-TSS (NM_001363918)	-520	NM_001363923	123920	Hs.298198	NM_144601	ENSG00000140931	CMTM3	BNAS2|CKLFSF3	CKLF like MARVEL transmembrane domain containing 3	protein-coding
MACS_peak_51335	chr3	32279278	32279512	+	54.15	NA	promoter-TSS (NM_178868)	promoter-TSS (NM_178868)	-776	NM_001320308	152189	Hs.154986	NM_178868	ENSG00000170293	CMTM8	CKLFSF8|CKLFSF8-V2	CKLF like MARVEL transmembrane domain containing 8	protein-coding
MACS_peak_65976	chr6	37400981	37401144	+	55.47	NA	promoter-TSS (NM_015050)	promoter-TSS (NM_015050)	65	NM_015050	23070	Hs.520102	NM_015050	ENSG00000137200	CMTR1	FTSJD2|KIAA0082|MTr1|hMTr1	cap methyltransferase 1	protein-coding
MACS_peak_36630	chr18	72163382	72163543	+	53.52	NA	promoter-TSS (NM_018235)	promoter-TSS (NM_018235)	-136	NM_018235	55748	Hs.149185	NM_018235	ENSG00000133313	CNDP2	CN2|CPGL|HEL-S-13|HsT2298|PEPA	carnosine dipeptidase 2	protein-coding
MACS_peak_20607	chr14	54907975	54908309	+	165.35	NA	promoter-TSS (NM_005776)	promoter-TSS (NM_005776)	-50	NM_005776	10175	Hs.294603	NM_005776	ENSG00000100528	CNIH1	CNIH|CNIH-1|CNIL|TGAM77	cornichon family AMPA receptor auxiliary protein 1	protein-coding
MACS_peak_14380	chr11	66044824	66044973	+	56.01	NA	promoter-TSS (NM_182553)	promoter-TSS (NM_182553)	-748	NR_073079	254263	Hs.437072	NM_182553	ENSG00000174871	CNIH2	CNIH-2|Cnil	cornichon family AMPA receptor auxiliary protein 2	protein-coding
MACS_peak_8816	chr1	224622813	224623052	+	54.51	NA	promoter-TSS (NM_025160)	promoter-TSS (NM_025160)	381	NR_136294	149111	Hs.731723	NM_152495	ENSG00000143786	CNIH3	CNIH-3	cornichon family AMPA receptor auxiliary protein 3	protein-coding
MACS_peak_8813	chr1	224544465	224544690	+	66.34	NA	promoter-TSS (NM_001277200)	promoter-TSS (NM_001277200)	-4	NM_001277199	29097	Hs.445890	NM_014184	ENSG00000143771	CNIH4	CNIH-4|CNIH2|HSPC163	cornichon family AMPA receptor auxiliary protein 4	protein-coding
MACS_peak_2811	chr1	26502934	26503089	+	54.24	NA	promoter-TSS (NM_001297648)	promoter-TSS (NM_001297648)	-971	NM_006314	10256	Hs.16232	NM_006314	ENSG00000142675	CNKSR1	CNK|CNK1	connector enhancer of kinase suppressor of Ras 1	protein-coding
MACS_peak_11315	chr10	104677551	104677784	+	63.64	NA	promoter-TSS (NM_017649)	promoter-TSS (NM_017649)	-384	NM_199076	54805	Hs.643509	NM_017649	ENSG00000148842	CNNM2	ACDP2|HOMG6|HOMGSMR	cyclin and CBS domain divalent metal cation transport mediator 2	protein-coding
MACS_peak_11316	chr10	104677791	104677951	+	53.83	NA	promoter-TSS (NM_017649)	promoter-TSS (NM_017649)	-180	NM_199076	54805	Hs.643509	NM_017649	ENSG00000148842	CNNM2	ACDP2|HOMG6|HOMGSMR	cyclin and CBS domain divalent metal cation transport mediator 2	protein-coding
MACS_peak_43008	chr2	97481986	97482120	+	55.88	NA	promoter-TSS (NM_017623)	promoter-TSS (NM_017623)	48	NM_199078	26505	Hs.711617	NM_017623	ENSG00000168763	CNNM3	ACDP3	cyclin and CBS domain divalent metal cation transport mediator 3	protein-coding
MACS_peak_28575	chr16	58663297	58663988	+	341.49	NA	promoter-TSS (NM_016284)	promoter-TSS (NM_016284)	88	NM_016284	23019	Hs.460923	NM_016284	ENSG00000125107	CNOT1	AD-005|CDC39|NOT1|NOT1H	CCR4-NOT transcription complex subunit 1	protein-coding
MACS_peak_28577	chr16	58664255	58664443	+	85.35	NA	promoter-TSS (NM_016284)	promoter-TSS (NM_016284)	-619	NM_001265612	23019	Hs.460923	NM_016284	ENSG00000125107	CNOT1	AD-005|CDC39|NOT1|NOT1H	CCR4-NOT transcription complex subunit 1	protein-coding
MACS_peak_28576	chr16	58663990	58664154	+	52.58	NA	promoter-TSS (NM_016284)	promoter-TSS (NM_016284)	-342	NM_001265612	23019	Hs.460923	NM_016284	ENSG00000125107	CNOT1	AD-005|CDC39|NOT1|NOT1H	CCR4-NOT transcription complex subunit 1	protein-coding
MACS_peak_43070	chr2	101869123	101869709	+	231.28	NA	promoter-TSS (NM_017546)	promoter-TSS (NM_017546)	68	NM_017546	55571	Hs.744080	NM_017546	ENSG00000158435	CNOT11	C2orf29|C40	CCR4-NOT transcription complex subunit 11	protein-coding
MACS_peak_18189	chr12	70636578	70637345	+	339.19	NA	promoter-TSS (NM_014515)	promoter-TSS (NM_014515)	151	NM_001199302	4848	Hs.133350	NM_014515	ENSG00000111596	CNOT2	CDC36|HSPC131|NOT2|NOT2H	CCR4-NOT transcription complex subunit 2	protein-coding
MACS_peak_41080	chr19	54641119	54641539	+	181.46	NA	promoter-TSS (NM_014516)	promoter-TSS (NM_014516)	-149	NM_014516	4849	Hs.343571	NM_014516	ENSG00000088038	CNOT3	LENG2|NOT3|NOT3H	CCR4-NOT transcription complex subunit 3	protein-coding
MACS_peak_41079	chr19	54640394	54640596	+	57.76	NA	promoter-TSS (NM_014516)	promoter-TSS (NM_014516)	-983	NM_014516	4849	Hs.343571	NM_014516	ENSG00000088038	CNOT3	LENG2|NOT3|NOT3H	CCR4-NOT transcription complex subunit 3	protein-coding
MACS_peak_71797	chr7	135195388	135195674	+	70.84	NA	promoter-TSS (NM_001190848)	promoter-TSS (NM_001190848)	-656	NM_001190848	4850	Hs.490224	NM_013316	ENSG00000080802	CNOT4	CLONE243|NOT4|NOT4H	CCR4-NOT transcription complex subunit 4	protein-coding
MACS_peak_64880	chr5	179921070	179921353	+	105.84	NA	promoter-TSS (NM_001370472)	promoter-TSS (NM_001370472)	-168	NR_163438	57472	Hs.608380	NM_015455	ENSG00000113300	CNOT6	CCR4|Ccr4a	CCR4-NOT transcription complex subunit 6	protein-coding
MACS_peak_55100	chr4	78741205	78741821	+	220.42	NA	promoter-TSS (NM_144571)	promoter-TSS (NM_144571)	-90	NM_001365006	246175	Hs.592519	NM_144571	ENSG00000138767	CNOT6L	CCR4b	CCR4-NOT transcription complex subunit 6 like	protein-coding
MACS_peak_55099	chr4	78740373	78740561	+	78.21	NA	promoter-TSS (NM_144571)	promoter-TSS (NM_144571)	55	NM_001286790	246175	Hs.592519	NM_144571	ENSG00000138767	CNOT6L	CCR4b	CCR4-NOT transcription complex subunit 6 like	protein-coding
MACS_peak_72329	chr8	17103850	17104544	+	325.29	NA	promoter-TSS (NM_152415)	promoter-TSS (NM_152415)	-71	NM_001322088	29883	Hs.587465	NM_013354	ENSG00000198791	CNOT7	CAF-1|CAF1|Caf1a|hCAF-1	CCR4-NOT transcription complex subunit 7	protein-coding
MACS_peak_63806	chr5	154237003	154238183	+	561.69	NA	promoter-TSS (NM_001301074)	promoter-TSS (NM_001301074)	-216	NM_001301083	9337	Hs.26703	NM_004779	ENSG00000155508	CNOT8	CAF1|CALIF|Caf1b|POP2|hCAF1	CCR4-NOT transcription complex subunit 8	protein-coding
MACS_peak_44681	chr2	219432665	219434130	+	906.17	NA	promoter-TSS (NM_005444)	promoter-TSS (NM_005444)	94	NM_001271635	9125	Hs.148767	NM_005444	ENSG00000144580	CNOT9	CAF40|CT129|RCD-1|RCD1|RQCD1	CCR4-NOT transcription complex subunit 9	protein-coding
MACS_peak_32409	chr17	40118573	40118788	+	95.72	NA	promoter-TSS (NM_033133)	promoter-TSS (NM_033133)	-133	NM_033133	1267	Hs.273621	NM_033133	ENSG00000173786	CNP	CNP1	2',3'-cyclic nucleotide 3' phosphodiesterase	protein-coding
MACS_peak_32408	chr17	40117973	40118329	+	67.79	NA	promoter-TSS (NM_033133)	promoter-TSS (NM_033133)	-662	NM_033133	1267	Hs.273621	NM_033133	ENSG00000173786	CNP	CNP1	2',3'-cyclic nucleotide 3' phosphodiesterase	protein-coding
MACS_peak_32410	chr17	40118811	40119405	+	194.97	NA	promoter-TSS (NM_001330216)	promoter-TSS (NM_001330216)	295	NM_033133	1267	Hs.273621	NM_033133	ENSG00000173786	CNP	CNP1	2',3'-cyclic nucleotide 3' phosphodiesterase	protein-coding
MACS_peak_32411	chr17	40119633	40120095	+	115.49	NA	promoter-TSS (NM_001330216)	promoter-TSS (NM_001330216)	49	NM_001330216	1267	Hs.273621	NM_033133	ENSG00000173786	CNP	CNP1	2',3'-cyclic nucleotide 3' phosphodiesterase	protein-coding
MACS_peak_44735	chr2	220041732	220042063	+	159.49	NA	promoter-TSS (NM_015680)	promoter-TSS (NM_015680)	-1	NR_135628	27013	Hs.4973	NM_015680	ENSG00000115649	CNPPD1	C2orf24|CGI-57	cyclin Pas1/PHO80 domain containing 1	protein-coding
MACS_peak_44734	chr2	220041490	220041694	+	60.92	NA	promoter-TSS (NM_015680)	promoter-TSS (NM_015680)	55	NM_015680	27013	Hs.4973	NM_015680	ENSG00000115649	CNPPD1	C2orf24|CGI-57	cyclin Pas1/PHO80 domain containing 1	protein-coding
MACS_peak_44736	chr2	220042570	220043007	+	196.98	NA	promoter-TSS (NM_001321389)	promoter-TSS (NM_001321389)	40	NM_001321389	27013	Hs.4973	NM_015680	ENSG00000115649	CNPPD1	C2orf24|CGI-57	cyclin Pas1/PHO80 domain containing 1	protein-coding
MACS_peak_17955	chr12	56709839	56710235	+	162.24	NA	promoter-TSS (NM_001190991)	promoter-TSS (NM_001190991)	95	NM_001190991	10330	Hs.8752	NM_014255	ENSG00000257727	CNPY2	HP10390|MSAP|TMEM4|ZSIG9	canopy FGF signaling regulator 2	protein-coding
MACS_peak_66095	chr6	42896814	42897182	+	158.78	NA	promoter-TSS (NR_134885)	promoter-TSS (NR_134885)	130	NM_001318842	10695	Hs.414099	NM_006586	ENSG00000137161	CNPY3	CAG4A|EIEE60|ERDA5|PRAT4A|TNRC5	canopy FGF signaling regulator 3	protein-coding
MACS_peak_70660	chr7	99716641	99718060	+	770	NA	promoter-TSS (NM_001365001)	promoter-TSS (NM_001365001)	93	NM_152755	245812	Hs.632293	NM_152755	ENSG00000166997	CNPY4	PRAT4B	canopy FGF signaling regulator 4	protein-coding
MACS_peak_9659	chr1	246730102	246730406	+	129.48	NA	promoter-TSS (NM_022366)	promoter-TSS (NM_022366)	496	NM_152609	163882	Hs.368353	NM_152609	ENSG00000162852	CNST	C1orf71|PPP1R64	consortin, connexin sorting protein	protein-coding
MACS_peak_9658	chr1	246729900	246730078	+	58.94	NA	promoter-TSS (NM_022366)	promoter-TSS (NM_022366)	231	NM_152609	163882	Hs.368353	NM_152609	ENSG00000162852	CNST	C1orf71|PPP1R64	consortin, connexin sorting protein	protein-coding
MACS_peak_32540	chr17	40950855	40951039	+	57.25	NA	promoter-TSS (NM_001330222)	promoter-TSS (NM_001330222)	68	NM_173478	124817	Hs.12272	NM_173478	ENSG00000176563	CNTD1	CNTD|COSA1	cyclin N-terminal domain containing 1	protein-coding
MACS_peak_75580	chr9	17134700	17135124	+	172.16	NA	promoter-TSS (NM_017738)	promoter-TSS (NM_017738)	-126	NM_001365029	54875	Hs.435381	NM_017738	ENSG00000044459	CNTLN	C9orf101|C9orf39|bA340N12.1	centlein	protein-coding
MACS_peak_77180	chr9	123883874	123884178	+	85.8	NA	promoter-TSS (NM_001369892)	promoter-TSS (NM_001369892)	-22	NM_001369892	11064	Hs.653263	NM_007018	ENSG00000119397	CNTRL	CEP1|CEP110|FAN|bA165P4.1	centriolin	protein-coding
MACS_peak_77179	chr9	123836648	123837846	+	442.52	NA	promoter-TSS (NM_001317163)	promoter-TSS (NM_001317163)	14	NM_001369893	11064	Hs.653263	NM_007018	ENSG00000119397	CNTRL	CEP1|CEP110|FAN|bA165P4.1	centriolin	protein-coding
MACS_peak_30301	chr17	7835662	7836172	+	123.74	NA	promoter-TSS (NM_021210)	promoter-TSS (NM_021210)	393	NM_001353203	116840	Hs.348012	NM_053051	ENSG00000170037	CNTROB	LIP8|PP1221	centrobin, centriole duplication and spindle assembly protein	protein-coding
MACS_peak_30300	chr17	7835373	7835650	+	96.32	NA	promoter-TSS (NM_001330124)	promoter-TSS (NM_001330124)	-13	NM_001353206	116840	Hs.348012	NM_053051	ENSG00000170037	CNTROB	LIP8|PP1221	centrobin, centriole duplication and spindle assembly protein	protein-coding
MACS_peak_68897	chr7	43768844	43769547	+	299.77	NA	promoter-TSS (NM_001350925)	promoter-TSS (NM_001350925)	-55	NM_001321199	55744	Hs.268887	NM_018224	ENSG00000106603	COA1	C7orf44|MITRAC15	cytochrome c oxidase assembly factor 1 homolog	protein-coding
MACS_peak_32539	chr17	40950602	40950853	+	101.61	NA	promoter-TSS (NM_001330222)	promoter-TSS (NM_001330222)	-5	NM_001040431	28958	Hs.16059	NM_001040431	ENSG00000183978	COA3	CCDC56|COX25|HSPC009|MITRAC12	cytochrome c oxidase assembly factor 3	protein-coding
MACS_peak_15357	chr11	73587554	73588357	+	332.26	NA	promoter-TSS (NM_001267805)	promoter-TSS (NM_001267805)	-64	NM_016565	51287	Hs.475387	NM_016565	ENSG00000181924	COA4	CHCHD8|CMC3|E2IG2	cytochrome c oxidase assembly factor 4 homolog	protein-coding
MACS_peak_4462	chr1	53163998	53164274	+	84.81	NA	promoter-TSS (NM_023077)	promoter-TSS (NM_023077)	-117	NM_023077	65260	Hs.349905	NM_023077	ENSG00000162377	COA7	C1orf163|RESA1|SCAN3|SELRC1	cytochrome c oxidase assembly factor 7 (putative)	protein-coding
MACS_peak_21492	chr14	104029200	104029591	+	129.86	NA	promoter-TSS (NM_001302652)	promoter-TSS (NM_001302652)	98	NR_126431	84334	Hs.598441	NM_001302652	ENSG00000256053	COA8	APOP|APOP1|APOPT1|C14orf153	cytochrome c oxidase assembly factor 8	protein-coding
MACS_peak_21493	chr14	104029620	104029754	+	55.88	NA	promoter-TSS (NM_001015048)	promoter-TSS (NM_001015048)	390	NR_126431	84334	Hs.598441	NM_001302652	ENSG00000256053	COA8	APOP|APOP1|APOPT1|C14orf153	cytochrome c oxidase assembly factor 8	protein-coding
MACS_peak_32494	chr17	40713872	40714475	+	316.69	NA	promoter-TSS (NM_001042532)	promoter-TSS (NM_001042532)	7	NM_025233	80347	Hs.296422	NM_025233	ENSG00000068120	COASY	DPCK|NBIA6|NBP|PCH12|PPAT|UKR1|pOV-2	Coenzyme A synthase	protein-coding
MACS_peak_43719	chr2	165698584	165698791	+	58.74	NA	promoter-TSS (NM_001365670)	promoter-TSS (NM_001365670)	-101	NM_001278458	22837	Hs.470457	NM_014900	ENSG00000082438	COBLL1	COBLR1	cordon-bleu WH2 repeat protein like 1	protein-coding
MACS_peak_34372	chr17	71189146	71189411	+	127.43	NA	promoter-TSS (NM_018714)	promoter-TSS (NM_018714)	84	NM_018714	9382	Hs.103555	NM_018714	ENSG00000166685	COG1	CDG2G|LDLB	component of oligomeric golgi complex 1	protein-coding
MACS_peak_9203	chr1	230777960	230778416	+	231.78	NA	promoter-TSS (NM_001145036)	promoter-TSS (NM_001145036)	-39	NM_007357	22796	Hs.211800	NM_007357	ENSG00000135775	COG2	CDG2Q|LDLC	component of oligomeric golgi complex 2	protein-coding
MACS_peak_28866	chr16	70557248	70557516	+	118.9	NA	promoter-TSS (NM_015386)	promoter-TSS (NM_015386)	75	NM_001195139	25839	Hs.208680	NM_015386	ENSG00000103051	COG4	CDG2J|COD1|SWILS	component of oligomeric golgi complex 4	protein-coding
MACS_peak_28777	chr16	69373136	69373878	+	271.1	NA	promoter-TSS (NM_016101)	promoter-TSS (NM_016101)	19	NM_032382	84342	Hs.130849	NM_032382	ENSG00000213380	COG8	CDG2H|DOR1	component of oligomeric golgi complex 8	protein-coding
MACS_peak_66398	chr6	75915704	75916104	+	140.14	NA	promoter-TSS (NM_004370)	promoter-TSS (NM_004370)	-135	NM_080645	1303	Hs.101302	NM_004370	ENSG00000111799	COL12A1	BA209D8.1|BTHLM2|COL12A1L|DJ234P15.1|EDSMYP|UCMD2	collagen type XII alpha 1 chain	protein-coding
MACS_peak_66399	chr6	75916131	75916291	+	53.83	NA	promoter-TSS (NM_004370)	promoter-TSS (NM_004370)	-442	NM_080645	1303	Hs.101302	NM_004370	ENSG00000111799	COL12A1	BA209D8.1|BTHLM2|COL12A1L|DJ234P15.1|EDSMYP|UCMD2	collagen type XII alpha 1 chain	protein-coding
MACS_peak_33430	chr17	48279596	48280052	+	146.71	NA	promoter-TSS (NM_000088)	promoter-TSS (NM_000088)	-824	NM_000088	1277	Hs.172928	NM_000088	ENSG00000108821	COL1A1	EDSARTH1|EDSC|OI1|OI2|OI3|OI4	collagen type I alpha 1 chain	protein-coding
MACS_peak_55351	chr4	110223750	110223895	+	52.07	NA	promoter-TSS (NM_001256074)	promoter-TSS (NM_001256074)	-8	NM_001256074	84570	Hs.658842	NM_032518	ENSG00000188517	COL25A1	AMY|CFEOM5|CLAC|CLAC-P|CLACP	collagen type XXV alpha 1 chain	protein-coding
MACS_peak_70902	chr7	101005618	101005778	+	82.03	NA	promoter-TSS (NM_133457)	promoter-TSS (NM_133457)	-403	NM_133457	136227	Hs.654854	NM_133457	ENSG00000160963	COL26A1	EMI6|EMID2|EMU2|SH2B	collagen type XXVI alpha 1 chain	protein-coding
MACS_peak_19985	chr13	110958715	110958972	+	101.81	NA	promoter-TSS (NM_001846)	promoter-TSS (NM_001846)	661	NM_001845	1282	Hs.17441	NM_001845	ENSG00000187498	COL4A1	BSVD|BSVD1|RATOR	collagen type IV alpha 1 chain	protein-coding
MACS_peak_19986	chr13	110959373	110959586	+	69.63	NA	promoter-TSS (NM_001845)	promoter-TSS (NM_001845)	25	NM_001845	1282	Hs.17441	NM_001845	ENSG00000187498	COL4A1	BSVD|BSVD1|RATOR	collagen type IV alpha 1 chain	protein-coding
MACS_peak_19987	chr13	110960264	110960606	+	126.44	NA	promoter-TSS (NM_001845)	promoter-TSS (NM_001845)	804	NM_001846	1284	Hs.508716	NM_001846	ENSG00000134871	COL4A2	BSVD2|ICH|POREN2	collagen type IV alpha 2 chain	protein-coding
MACS_peak_44953	chr2	228029148	228029326	+	67.92	NA	promoter-TSS (NM_000091)	promoter-TSS (NM_000091)	38	NM_000092	1286	Hs.591645	NM_000092	ENSG00000081052	COL4A4	ATS2|BFH|CA44	collagen type IV alpha 4 chain	protein-coding
MACS_peak_80599	chr9	137532918	137533744	+	335.99	NA	promoter-TSS (NM_000093)	promoter-TSS (NM_000093)	-320	NM_001278074	1289	Hs.210283	NM_000093	ENSG00000130635	COL5A1	EDSC|EDSCL1	collagen type V alpha 1 chain	protein-coding
MACS_peak_51145	chr3	15247373	15247573	+	52.92	NA	promoter-TSS (NR_027927)	promoter-TSS (NR_027927)	-7	NR_027927	344875	Hs.722756	NR_027927	ENSG00000230524	COL6A4P1	COL6A4|COL6A4P|DIVA|DVWA|VWA6	collagen type VI alpha 4 pseudogene 1	pseudo
MACS_peak_51865	chr3	48632909	48633677	+	177.32	NA	promoter-TSS (NM_000094)	promoter-TSS (NM_000094)	-700	NM_000094	1294	Hs.476218	NM_000094	ENSG00000114270	COL7A1	EBD1|EBDCT|EBR1|NDNC8	collagen type VII alpha 1 chain	protein-coding
MACS_peak_52740	chr3	99356805	99356994	+	71.59	NA	promoter-TSS (NM_001850)	promoter-TSS (NM_001850)	-539	NM_001850	1295	Hs.654548	NM_001850	ENSG00000144810	COL8A1	C3orf7	collagen type VIII alpha 1 chain	protein-coding
MACS_peak_73667	chr8	119964508	119964675	+	58.17	NA	promoter-TSS (NM_002546)	promoter-TSS (NM_002546)	89	NM_001324095	10584	Hs.176615	NM_006438	ENSG00000184374	COLEC10	3MC3|CL-34|CLL1	collectin subfamily member 10	protein-coding
MACS_peak_38994	chr19	17666055	17666456	+	173.31	NA	promoter-TSS (NM_024656)	promoter-TSS (NM_024656)	-203	NM_024656	79709	Hs.418795	NM_024656	ENSG00000130309	COLGALT1	BSVD3|ColGalT 1|GLT25D1	collagen beta(1-O)galactosyltransferase 1	protein-coding
MACS_peak_62412	chr5	115420555	115420804	+	87.88	NA	promoter-TSS (NR_146220)	promoter-TSS (NR_146220)	-43	NR_146220	51397	Hs.483136	NM_016144	ENSG00000145781	COMMD10	PTD002	COMM domain containing 10	protein-coding
MACS_peak_62413	chr5	115420946	115421225	+	66.66	NA	promoter-TSS (NM_001308080)	promoter-TSS (NM_001308080)	-74	NM_001308080	51397	Hs.483136	NM_016144	ENSG00000145781	COMMD10	PTD002	COMM domain containing 10	protein-coding
MACS_peak_53446	chr3	149470081	149470430	+	196.87	NA	promoter-TSS (NR_135149)	promoter-TSS (NR_135149)	21	NM_016094	51122	Hs.432729	NM_016094	ENSG00000114744	COMMD2	HSPC042	COMM domain containing 2	protein-coding
MACS_peak_10040	chr10	22604902	22605095	+	56.57	NA	promoter-TSS (NM_012071)	promoter-TSS (NM_012071)	-314	NM_001204062	100532731	Hs.380403	NM_001204062	ENSG00000269897	COMMD3-BMI1	BMI1|PCGF4|RNF51	COMMD3-BMI1 readthrough	protein-coding
MACS_peak_75333	chr8	146078628	146079050	+	119.54	NA	promoter-TSS (NM_014066)	promoter-TSS (NM_014066)	102	NM_001081003	28991	Hs.493218	NM_014066	ENSG00000170619	COMMD5	HCARG|HT002	COMM domain containing 5	protein-coding
MACS_peak_19658	chr13	76111753	76112116	+	124.65	NA	promoter-TSS (NM_203497)	promoter-TSS (NM_203497)	74	NM_203497	170622	Hs.508266	NM_203495	ENSG00000188243	COMMD6	Acrg	COMM domain containing 6	protein-coding
MACS_peak_45581	chr20	31332578	31332699	+	57.23	NA	promoter-TSS (NM_001099339)	promoter-TSS (NM_001099339)	-824	NM_053041	149951	Hs.408427	NM_053041	ENSG00000149600	COMMD7	C20orf92|dJ1085F17.3	COMM domain containing 7	protein-coding
MACS_peak_12646	chr11	36310694	36311351	+	305.23	NA	promoter-TSS (NM_014186)	promoter-TSS (NM_014186)	-48	NM_001101653	29099	Hs.99443	NM_014186	ENSG00000110442	COMMD9	C11orf55|HSPC166|LINC00610	COMM domain containing 9	protein-coding
MACS_peak_7462	chr1	176176451	176176882	+	153.11	NA	promoter-TSS (NM_001001740)	promoter-TSS (NM_001001740)	-244	NM_022457	64326	Hs.523744	NM_022457	ENSG00000143207	COP1	RFWD2|RNF200	COP1 E3 ubiquitin ligase	protein-coding
MACS_peak_7144	chr1	160312748	160313449	+	371.35	NA	promoter-TSS (NM_015331)	promoter-TSS (NM_015331)	-58	NM_001098398	1314	Hs.162121	NM_004371	ENSG00000122218	COPA	AILJK|HEP-COP|alpha-COP	coatomer protein complex subunit alpha	protein-coding
MACS_peak_12281	chr11	14521261	14521472	+	63.83	NA	promoter-TSS (NM_001144061)	promoter-TSS (NM_001144061)	38	NM_016451	1315	Hs.339278	NM_016451	ENSG00000129083	COPB1	COPB	coatomer protein complex subunit beta 1	protein-coding
MACS_peak_53322	chr3	139108079	139108405	+	139.34	NA	promoter-TSS (NR_121608)	promoter-TSS (NR_121608)	247	NM_004766	9276	Hs.681616	NM_004766	ENSG00000184432	COPB2	MCPH19|beta'-COP	coatomer protein complex subunit beta 2	protein-coding
MACS_peak_39188	chr19	19029883	19030817	+	535.84	NA	promoter-TSS (NR_033677)	promoter-TSS (NR_033677)	-154	NM_001330469	11316	Hs.10326	NM_007263	ENSG00000105669	COPE	epsilon-COP	coatomer protein complex subunit epsilon	protein-coding
MACS_peak_53130	chr3	128968077	128968461	+	166.87	NA	promoter-TSS (NM_016128)	promoter-TSS (NM_016128)	-180	NM_016128	22820	Hs.518250	NM_016128	ENSG00000181789	COPG1	COPG	coatomer protein complex subunit gamma 1	protein-coding
MACS_peak_53129	chr3	128967855	128968010	+	54.24	NA	promoter-TSS (NM_016128)	promoter-TSS (NM_016128)	-517	NM_016128	22820	Hs.518250	NM_016128	ENSG00000181789	COPG1	COPG	coatomer protein complex subunit gamma 1	protein-coding
MACS_peak_71694	chr7	130353454	130353664	+	67.38	NA	promoter-TSS (NM_012133)	promoter-TSS (NM_012133)	29	NM_012133	26958	Hs.6421	NM_012133	ENSG00000158623	COPG2	2-COP|gamma-2-COP	coatomer protein complex subunit gamma 2	protein-coding
MACS_peak_22711	chr15	49447139	49448166	+	443.04	NA	promoter-TSS (NM_001001556)	promoter-TSS (NM_001001556)	144	NM_001143887	9318	Hs.369614	NM_004236	ENSG00000166200	COPS2	ALIEN|CSN2|SGN2|TRIP15	COP9 signalosome subunit 2	protein-coding
MACS_peak_30693	chr17	17184162	17184614	+	182.42	NA	promoter-TSS (NM_001199125)	promoter-TSS (NM_001199125)	172	NM_003653	8533	Hs.6076	NM_003653	ENSG00000141030	COPS3	CSN3|SGN3	COP9 signalosome subunit 3	protein-coding
MACS_peak_30692	chr17	17183901	17184102	+	61.68	NA	promoter-TSS (NM_001199125)	promoter-TSS (NM_001199125)	11	NM_001199125	8533	Hs.6076	NM_003653	ENSG00000141030	COPS3	CSN3|SGN3	COP9 signalosome subunit 3	protein-coding
MACS_peak_55149	chr4	83956104	83956534	+	224.56	NA	promoter-TSS (NM_016129)	promoter-TSS (NM_016129)	-17	NM_016129	51138	Hs.190384	NM_016129	ENSG00000138663	COPS4	CSN4|SGN4	COP9 signalosome subunit 4	protein-coding
MACS_peak_70654	chr7	99686249	99686644	+	102.92	NA	promoter-TSS (NM_006833)	promoter-TSS (NM_006833)	-146	NM_006833	10980	Hs.15591	NM_006833	ENSG00000168090	COPS6	CSN6|MOV34-34KD	COP9 signalosome subunit 6	protein-coding
MACS_peak_16342	chr12	6833018	6833701	+	302.93	NA	promoter-TSS (NM_001164093)	promoter-TSS (NM_001164093)	-94	NM_001164093	50813	Hs.530823	NM_016319	ENSG00000111652	COPS7A	CSN7|CSN7A|SGN7a	COP9 signalosome subunit 7A	protein-coding
MACS_peak_45062	chr2	232650945	232651250	+	125.34	NA	promoter-TSS (NM_022730)	promoter-TSS (NM_022730)	4	NM_001282952	64708	Hs.335061	NM_022730	ENSG00000144524	COPS7B	CSN7B|SGN7b	COP9 signalosome subunit 7B	protein-coding
MACS_peak_45188	chr2	237994367	237994696	+	167.5	NA	promoter-TSS (NM_006710)	promoter-TSS (NM_006710)	-1	NM_006710	10920	Hs.531713	NM_006710	ENSG00000198612	COPS8	COP9|CSN8|SGN8	COP9 signalosome subunit 8	protein-coding
MACS_peak_45187	chr2	237994130	237994297	+	58.17	NA	promoter-TSS (NM_006710)	promoter-TSS (NM_006710)	129	NM_198189	10920	Hs.531713	NM_006710	ENSG00000198612	COPS8	COP9|CSN8|SGN8	COP9 signalosome subunit 8	protein-coding
MACS_peak_66559	chr6	99841914	99842322	+	171.83	NA	promoter-TSS (NM_017421)	promoter-TSS (NM_017421)	-47	NM_017421	51805	Hs.713623	NM_017421	ENSG00000132423	COQ3	DHHBMT|DHHBMTASE|UG0215E05|bA9819.1	coenzyme Q3, methyltransferase	protein-coding
MACS_peak_20954	chr14	74416689	74417291	+	343.53	NA	promoter-TSS (NM_182476)	promoter-TSS (NM_182476)	-15	NM_182476	51004	Hs.131555	NM_182476	ENSG00000119723	COQ6	CGI-10|CGI10|COQ10D6	coenzyme Q6, monooxygenase	protein-coding
MACS_peak_27319	chr16	19078831	19079423	+	343.43	NA	promoter-TSS (NR_119382)	promoter-TSS (NR_119382)	82	NM_001370494	10229	Hs.157113	NM_016138	ENSG00000167186	COQ7	CAT5|CLK-1|CLK1|COQ10D8	coenzyme Q7, hydroxylase	protein-coding
MACS_peak_27320	chr16	19079661	19079989	+	61.49	NA	promoter-TSS (NR_119379)	promoter-TSS (NR_119379)	-144	NM_001370491	10229	Hs.157113	NM_016138	ENSG00000167186	COQ7	CAT5|CLK-1|CLK1|COQ10D8	coenzyme Q7, hydroxylase	protein-coding
MACS_peak_8979	chr1	227127214	227127994	+	355	NA	promoter-TSS (NM_020247)	promoter-TSS (NM_020247)	-391	NM_020247	56997	Hs.118241	NM_020247	ENSG00000163050	COQ8A	ADCK3|ARCA2|CABC1|COQ10D4|COQ8|SCAR9	coenzyme Q8A	protein-coding
MACS_peak_39864	chr19	41222688	41222962	+	153.84	NA	promoter-TSS (NM_025194)	promoter-TSS (NM_025194)	-34	NM_024876	79934	Hs.130712	NM_024876	ENSG00000123815	COQ8B	ADCK4|NPHS9	coenzyme Q8B	protein-coding
MACS_peak_39863	chr19	41221526	41221842	+	136.06	NA	promoter-TSS (NM_001142555)	promoter-TSS (NM_001142555)	-660	NM_001142555	79934	Hs.130712	NM_024876	ENSG00000123815	COQ8B	ADCK4|NPHS9	coenzyme Q8B	protein-coding
MACS_peak_39862	chr19	41221034	41221344	+	90.32	NA	promoter-TSS (NM_001142555)	promoter-TSS (NM_001142555)	-165	NM_001142555	79934	Hs.130712	NM_024876	ENSG00000123815	COQ8B	ADCK4|NPHS9	coenzyme Q8B	protein-coding
MACS_peak_28098	chr16	30194641	30194800	+	54.15	NA	promoter-TSS (NM_007074)	promoter-TSS (NM_007074)	-11	NM_007074	11151	Hs.415067	NM_007074	ENSG00000102879	CORO1A	CLABP|CLIPINA|HCORO1|IMD8|TACO|p57	coronin 1A	protein-coding
MACS_peak_14723	chr11	67211383	67211624	+	89.5	NA	promoter-TSS (NM_020441)	promoter-TSS (NM_020441)	-211	NM_001018070	57175	Hs.6191	NM_020441	ENSG00000172725	CORO1B	CORONIN-2	coronin 1B	protein-coding
MACS_peak_14724	chr11	67211732	67211899	+	58.72	NA	promoter-TSS (NM_020441)	promoter-TSS (NM_020441)	-523	NM_001018070	57175	Hs.6191	NM_020441	ENSG00000172725	CORO1B	CORONIN-2	coronin 1B	protein-coding
MACS_peak_18562	chr12	109125965	109126244	+	114.68	NA	promoter-TSS (NM_014325)	promoter-TSS (NM_014325)	-778	NM_014325	23603	Hs.330384	NM_014325	ENSG00000110880	CORO1C	HCRNN4	coronin 1C	protein-coding
MACS_peak_18561	chr12	109125523	109125755	+	83.25	NA	promoter-TSS (NM_014325)	promoter-TSS (NM_014325)	-313	NM_014325	23603	Hs.330384	NM_014325	ENSG00000110880	CORO1C	HCRNN4	coronin 1C	protein-coding
MACS_peak_76816	chr9	100935144	100935298	+	55.78	NA	promoter-TSS (NM_003389)	promoter-TSS (NM_003389)	-47	NM_003389	7464	Hs.113094	NM_003389	ENSG00000106789	CORO2A	CLIPINB|IR10|WDR2	coronin 2A	protein-coding
MACS_peak_23521	chr15	68933172	68933527	+	88.12	NA	promoter-TSS (NM_001324015)	promoter-TSS (NM_001324015)	-493	NM_001324015	10391	Hs.551213	NM_006091	ENSG00000103647	CORO2B	CLIPINC	coronin 2B	protein-coding
MACS_peak_26563	chr16	4466504	4466879	+	130.91	NA	promoter-TSS (NM_001201472)	promoter-TSS (NM_001201472)	-94	NM_001201473	79585	Hs.437957	NM_024535	ENSG00000262246	CORO7	0610011B16Rik|CRN7|POD1	coronin 7	protein-coding
MACS_peak_30490	chr17	13972431	13972903	+	286.01	NA	promoter-TSS (NM_001303)	promoter-TSS (NM_001303)	108	NR_049718	100874058	Hs.720411	NR_049718	ENSG00000236088	COX10-AS1	COX10-AS|COX10AS	COX10 antisense RNA 1	ncRNA
MACS_peak_33576	chr17	53045857	53046498	+	211.72	NA	promoter-TSS (NM_001321518)	promoter-TSS (NM_001321518)	-31	NM_004375	1353	Hs.591171	NM_004375	ENSG00000166260	COX11	COX11P	cytochrome c oxidase copper chaperone COX11	protein-coding
MACS_peak_17353	chr12	50505462	50506340	+	456.07	NA	promoter-TSS (NM_001257134)	promoter-TSS (NM_001257134)	-118	NM_001257133	84987	Hs.388645	NM_032901	ENSG00000178449	COX14	C12orf62|PCAG1	cytochrome c oxidase assembly factor COX14	protein-coding
MACS_peak_11165	chr10	101492296	101492613	+	142.88	NA	promoter-TSS (NM_001320976)	promoter-TSS (NM_001320976)	-31	NM_001320975	1355	Hs.28326	NM_004376	ENSG00000014919	COX15	CEMCOX2	cytochrome c oxidase assembly homolog COX15	protein-coding
MACS_peak_20873	chr14	70826162	70826610	+	109.93	NA	promoter-TSS (NM_016468)	promoter-TSS (NM_016468)	14	NM_016468	51241	Hs.709581	NM_016468	ENSG00000133983	COX16	C14orf112|HSPC203|hCOX16	cytochrome c oxidase assembly factor COX16	protein-coding
MACS_peak_55043	chr4	73935145	73935711	+	345.19	NA	promoter-TSS (NM_001297733)	promoter-TSS (NM_001297733)	5	NM_173827	285521	Hs.356697	NM_173827	ENSG00000163626	COX18	COX18HS	cytochrome c oxidase assembly factor COX18	protein-coding
MACS_peak_9598	chr1	244998063	244998332	+	90.97	NA	promoter-TSS (NM_001312872)	promoter-TSS (NM_001312872)	-411	NM_001312871	116228	Hs.411490	NM_198076	ENSG00000203667	COX20	FAM36A	cytochrome c oxidase assembly factor COX20	protein-coding
MACS_peak_9599	chr1	244998636	244998905	+	89.98	NA	promoter-TSS (NM_001312872)	promoter-TSS (NM_001312872)	-8	NR_132419	116228	Hs.411490	NM_198076	ENSG00000203667	COX20	FAM36A	cytochrome c oxidase assembly factor COX20	protein-coding
MACS_peak_29161	chr16	85833105	85833348	+	99.98	NA	promoter-TSS (NM_001318794)	promoter-TSS (NM_001318794)	-75	NM_001861	1327	Hs.433419	NM_001861	ENSG00000131143	COX4I1	COX IV-1|COX4|COX4-1|COXIV|COXIV-1	cytochrome c oxidase subunit 4I1	protein-coding
MACS_peak_45464	chr20	30224854	30225104	+	90.58	NA	promoter-TSS (NM_032609)	promoter-TSS (NM_032609)	-736	NM_032609	84701	Hs.277101	NM_032609	ENSG00000131055	COX4I2	COX4|COX4-2|COX4B|COX4L2|COXIV-2|dJ857M17.2	cytochrome c oxidase subunit 4I2	protein-coding
MACS_peak_24064	chr15	75230955	75231162	+	92.61	NA	promoter-TSS (NM_004255)	promoter-TSS (NM_004255)	-644	NM_004255	9377	Hs.401903	NM_004255	ENSG00000178741	COX5A	COX|COX-VA|VA	cytochrome c oxidase subunit 5A	protein-coding
MACS_peak_24065	chr15	75231176	75231315	+	63.36	NA	promoter-TSS (NM_004255)	promoter-TSS (NM_004255)	-831	NM_004255	9377	Hs.401903	NM_004255	ENSG00000178741	COX5A	COX|COX-VA|VA	cytochrome c oxidase subunit 5A	protein-coding
MACS_peak_43024	chr2	98262329	98262559	+	97.8	NA	promoter-TSS (NM_001862)	promoter-TSS (NM_001862)	-81	NM_001862	1329	Hs.1342	NM_001862	ENSG00000135940	COX5B	COXVB	cytochrome c oxidase subunit 5B	protein-coding
MACS_peak_18883	chr12	120875473	120876251	+	292.45	NA	promoter-TSS (NM_004373)	promoter-TSS (NM_004373)	-54	NM_004373	1337	Hs.369624	NM_004373	ENSG00000111775	COX6A1	CMTRID|COX6A|COX6AL	cytochrome c oxidase subunit 6A1	protein-coding
MACS_peak_39424	chr19	36139060	36139270	+	64.13	NA	promoter-TSS (NM_001863)	promoter-TSS (NM_001863)	-60	NM_001863	1340	Hs.431668	NM_001863	ENSG00000126267	COX6B1	COX6B|COXG|COXVIb1	cytochrome c oxidase subunit 6B1	protein-coding
MACS_peak_41960	chr2	42587710	42587886	+	55.32	NA	promoter-TSS (NR_134948)	promoter-TSS (NR_134948)	559	NM_001319038	9167	Hs.339639	NM_004718	ENSG00000115944	COX7A2L	COX7AR|COX7RP|EB1|SIG81	cytochrome c oxidase subunit 7A2 like	protein-coding
MACS_peak_41961	chr2	42588241	42588734	+	239.47	NA	promoter-TSS (NR_134947)	promoter-TSS (NR_134947)	-104	NM_001319040	9167	Hs.339639	NM_004718	ENSG00000115944	COX7A2L	COX7AR|COX7RP|EB1|SIG81	cytochrome c oxidase subunit 7A2 like	protein-coding
MACS_peak_41962	chr2	42588738	42588862	+	52.5	NA	promoter-TSS (NR_134947)	promoter-TSS (NR_134947)	-417	NM_001319040	9167	Hs.339639	NM_004718	ENSG00000115944	COX7A2L	COX7AR|COX7RP|EB1|SIG81	cytochrome c oxidase subunit 7A2 like	protein-coding
MACS_peak_13812	chr11	63741856	63742424	+	350.56	NA	promoter-TSS (NM_004074)	promoter-TSS (NM_004074)	48	NM_004074	1351	Hs.743989	NM_004074	ENSG00000176340	COX8A	COX|COX8|COX8-2|COX8L|VIII|VIII-L	cytochrome c oxidase subunit 8A	protein-coding
MACS_peak_13811	chr11	63741316	63741811	+	186.51	NA	promoter-TSS (NM_004074)	promoter-TSS (NM_004074)	-529	NM_004074	1351	Hs.743989	NM_004074	ENSG00000176340	COX8A	COX|COX8|COX8-2|COX8L|VIII|VIII-L	cytochrome c oxidase subunit 8A	protein-coding
MACS_peak_71685	chr7	130019496	130019627	+	50.03	NA	promoter-TSS (NM_001868)	promoter-TSS (NM_001868)	-774	NM_001868	1357	Hs.2879	NM_001868	ENSG00000091704	CPA1	CPA	carboxypeptidase A1	protein-coding
MACS_peak_31426	chr17	28705136	28705350	+	54.66	NA	promoter-TSS (NM_001304)	promoter-TSS (NM_001304)	-702	NM_001304	1362	Hs.446079	NM_001304	ENSG00000108582	CPD	GP180	carboxypeptidase D	protein-coding
MACS_peak_24652	chr15	83317416	83317576	+	53.83	NA	promoter-TSS (NM_030594)	promoter-TSS (NM_030594)	50	NM_001365246	64506	Hs.459132	NM_030594	ENSG00000214575	CPEB1	CPE-BP1|CPEB|CPEB-1|h-CPEB|hCPEB-1	cytoplasmic polyadenylation element binding protein 1	protein-coding
MACS_peak_54595	chr4	15004044	15004574	+	253.54	NA	promoter-TSS (NR_038857)	promoter-TSS (NR_038857)	204	NM_001177383	132864	Hs.656937	NM_182485	ENSG00000137449	CPEB2	CPE-BP2|CPEB-2|hCPEB-2	cytoplasmic polyadenylation element binding protein 2	protein-coding
MACS_peak_54594	chr4	15003670	15003846	+	61.85	NA	promoter-TSS (NM_001177382)	promoter-TSS (NM_001177382)	-89	NR_038857	441009	Hs.535004	NR_038857	ENSG00000247624	CPEB2-DT	CPEB2-AS1	CPEB2 divergent transcript	ncRNA
MACS_peak_54593	chr4	15003139	15003296	+	54.8	NA	promoter-TSS (NM_001177382)	promoter-TSS (NM_001177382)	452	NR_038857	441009	Hs.535004	NR_038857	ENSG00000247624	CPEB2-DT	CPEB2-AS1	CPEB2 divergent transcript	ncRNA
MACS_peak_64310	chr5	173314706	173315504	+	255.08	NA	promoter-TSS (NM_030627)	promoter-TSS (NM_030627)	-247	NM_001308191	80315	Hs.127126	NM_030627	ENSG00000113742	CPEB4	CPE-BP4|hCPEB-4	cytoplasmic polyadenylation element binding protein 4	protein-coding
MACS_peak_71448	chr7	120627783	120627965	+	51.37	NA	promoter-TSS (NM_024913)	promoter-TSS (NM_024913)	-891	NM_024913	79974	Hs.189652	NM_024913	ENSG00000106034	CPED1	C7orf58	cadherin like and PC-esterase domain containing 1	protein-coding
MACS_peak_54024	chr3	194072456	194072877	+	139.73	NA	promoter-TSS (NM_001291988)	promoter-TSS (NM_001291988)	-609	NM_001291988	1370	Hs.528368	NM_001309	ENSG00000178772	CPN2	ACBP	carboxypeptidase N subunit 2	protein-coding
MACS_peak_45800	chr20	34253590	34253735	+	50.28	NA	promoter-TSS (NM_152926)	promoter-TSS (NM_152926)	-840	NM_152928	8904	Hs.246413	NM_003915	ENSG00000214078	CPNE1	COPN1|CPN1	copine 1	protein-coding
MACS_peak_73373	chr8	97657223	97657402	+	63.41	NA	promoter-TSS (NM_016134)	promoter-TSS (NM_016134)	-158	NM_016134	10404	Hs.156178	NM_016134	ENSG00000104324	CPQ	LDP|PGCP	carboxypeptidase Q	protein-coding
MACS_peak_75161	chr8	145635124	145635527	+	156.01	NA	promoter-TSS (NM_013291)	promoter-TSS (NM_013291)	-606	NM_013291	29894	Hs.493202	NM_013291	ENSG00000071894	CPSF1	CPSF160|HSU37012|P/cl.18	cleavage and polyadenylation specific factor 1	protein-coding
MACS_peak_75160	chr8	145634691	145635087	+	106.08	NA	promoter-TSS (NM_013291)	promoter-TSS (NM_013291)	-170	NM_013291	29894	Hs.493202	NM_013291	ENSG00000071894	CPSF1	CPSF160|HSU37012|P/cl.18	cleavage and polyadenylation specific factor 1	protein-coding
MACS_peak_21212	chr14	92588206	92588374	+	51.37	NA	promoter-TSS (NM_017437)	promoter-TSS (NM_017437)	-23	NM_017437	53981	Hs.657632	NM_017437	ENSG00000165934	CPSF2	CPSF100	cleavage and polyadenylation specific factor 2	protein-coding
MACS_peak_21213	chr14	92588571	92589014	+	179.72	NA	promoter-TSS (NM_004545)	promoter-TSS (NM_004545)	479	NM_001322270	53981	Hs.657632	NM_017437	ENSG00000165934	CPSF2	CPSF100	cleavage and polyadenylation specific factor 2	protein-coding
MACS_peak_41372	chr2	9563531	9563975	+	158.64	NA	promoter-TSS (NR_134953)	promoter-TSS (NR_134953)	-30	NM_016207	51692	Hs.515972	NM_016207	ENSG00000119203	CPSF3	CPSF-73|CPSF73	cleavage and polyadenylation specific factor 3	protein-coding
MACS_peak_41373	chr2	9564140	9564325	+	93.46	NA	promoter-TSS (NR_134953)	promoter-TSS (NR_134953)	449	NM_016207	51692	Hs.515972	NM_016207	ENSG00000119203	CPSF3	CPSF-73|CPSF73	cleavage and polyadenylation specific factor 3	protein-coding
MACS_peak_70605	chr7	99036649	99036920	+	86.65	NA	promoter-TSS (NM_001318162)	promoter-TSS (NM_001318162)	-215	NM_001318162	10898	Hs.489287	NM_006693	ENSG00000160917	CPSF4	CPSF30|NAR|NEB-1|NEB1	cleavage and polyadenylation specific factor 4	protein-coding
MACS_peak_18169	chr12	69633068	69633539	+	169.54	NA	promoter-TSS (NM_001300947)	promoter-TSS (NM_001300947)	-46	NM_007007	11052	Hs.369606	NM_007007	ENSG00000111605	CPSF6	CFIM|CFIM68|CFIM72|HPBRII-4|HPBRII-7	cleavage and polyadenylation specific factor 6	protein-coding
MACS_peak_191	chr1	1260772	1261224	+	212.22	NA	promoter-TSS (NM_001256456)	promoter-TSS (NM_001256456)	816	NM_001029885	80772	Hs.515689	NM_001029885	ENSG00000224051	CPTP	GLTPD1	ceramide-1-phosphate transfer protein	protein-coding
MACS_peak_7062	chr1	156675457	156675670	+	53.46	NA	promoter-TSS (NM_001199723)	promoter-TSS (NM_001199723)	45	NM_001199723	1382	Hs.405662	NM_001878	ENSG00000143320	CRABP2	CRABP-II|RBP6	cellular retinoic acid binding protein 2	protein-coding
MACS_peak_18340	chr12	94071164	94071638	+	172.27	NA	promoter-TSS (NM_001320099)	promoter-TSS (NM_001320099)	-92	NM_001320099	8738	Hs.38533	NM_003805	ENSG00000169372	CRADD	MRT34|RAIDD	CASP2 and RIPK1 domain containing adaptor with death domain	protein-coding
MACS_peak_78889	chr9	131872335	131872699	+	120.66	NA	promoter-TSS (NM_021131)	promoter-TSS (NM_021131)	555	NM_001346548	1384	Hs.12068	NM_000755	ENSG00000095321	CRAT	CAT|CAT1|NBIA8	carnitine O-acetyltransferase	protein-coding
MACS_peak_7762	chr1	197169831	197170882	+	475.47	NA	promoter-TSS (NM_194314)	promoter-TSS (NM_194314)	-278	NM_001257965	23418	Hs.126135	NM_012076	ENSG00000134376	CRB1	LCA8|RP12	crumbs cell polarity complex component 1	protein-coding
MACS_peak_77430	chr9	126130430	126130804	+	98.09	NA	promoter-TSS (NR_104603)	promoter-TSS (NR_104603)	-441	NR_104603	286204	Hs.568340	NM_173689	ENSG00000148204	CRB2	FSGS9|VMCKD	crumbs cell polarity complex component 2	protein-coding
MACS_peak_77429	chr9	126129979	126130314	+	80.41	NA	promoter-TSS (NR_104603)	promoter-TSS (NR_104603)	-912	NR_104603	286204	Hs.568340	NM_173689	ENSG00000148204	CRB2	FSGS9|VMCKD	crumbs cell polarity complex component 2	protein-coding
MACS_peak_50695	chr3	3221104	3221622	+	186.98	NA	promoter-TSS (NM_016302)	promoter-TSS (NM_016302)	38	NM_001173482	51185	Hs.18925	NM_016302	ENSG00000113851	CRBN	MRT2|MRT2A	cereblon	protein-coding
MACS_peak_44421	chr2	208394245	208395033	+	291.21	NA	promoter-TSS (NM_004379)	promoter-TSS (NM_004379)	-47	NR_135473	1385	Hs.516646	NM_004379	ENSG00000118260	CREB1	CREB|CREB-1	cAMP responsive element binding protein 1	protein-coding
MACS_peak_75964	chr9	35731983	35733112	+	528.85	NA	promoter-TSS (NM_006289)	promoter-TSS (NM_006289)	-116	NM_006368	10488	Hs.522110	NM_006368	ENSG00000107175	CREB3	LUMAN|LZIP|sLZIP	cAMP responsive element binding protein 3	protein-coding
MACS_peak_12801	chr11	46298335	46298699	+	107.91	NA	promoter-TSS (NM_052854)	promoter-TSS (NM_052854)	-696	NM_052854	90993	Hs.405961	NM_052854	ENSG00000157613	CREB3L1	OASIS|OI16	cAMP responsive element binding protein 3 like 1	protein-coding
MACS_peak_71824	chr7	137686484	137687073	+	258.71	NA	promoter-TSS (NM_001253775)	promoter-TSS (NM_001253775)	54	NM_194071	64764	Hs.490273	NM_194071	ENSG00000182158	CREB3L2	BBF2H7	cAMP responsive element binding protein 3 like 2	protein-coding
MACS_peak_37406	chr19	4153490	4153632	+	59.99	NA	promoter-TSS (NM_001271995)	promoter-TSS (NM_001271995)	-67	NM_001271995	84699	Hs.247744	NM_032607	ENSG00000060566	CREB3L3	CREB-H|CREBH|HYST1481	cAMP responsive element binding protein 3 like 3	protein-coding
MACS_peak_68645	chr7	28725293	28725531	+	103.49	NA	promoter-TSS (NM_001011666)	promoter-TSS (NM_001011666)	-338	NM_001011666	9586	Hs.437075	NM_004904	ENSG00000146592	CREB5	CRE-BPA|CREB-5|CREBPA	cAMP responsive element binding protein 5	protein-coding
MACS_peak_26424	chr16	3930682	3930994	+	120.59	NA	promoter-TSS (NM_001079846)	promoter-TSS (NM_001079846)	-124	NM_004380	1387	Hs.459759	NM_004380	ENSG00000005339	CREBBP	CBP|KAT3A|MKHK1|RSTS|RSTS1	CREB binding protein	protein-coding
MACS_peak_64242	chr5	172483077	172483515	+	215.29	NA	promoter-TSS (NM_153607)	promoter-TSS (NM_153607)	-59	NM_001168394	153222	Hs.484195	NM_153607	ENSG00000164463	CREBRF	C5orf41|LRF	CREB3 regulatory factor	protein-coding
MACS_peak_50893	chr3	9975223	9975791	+	366.01	NA	promoter-TSS (NM_001031717)	promoter-TSS (NM_001031717)	-11	NM_001077415	78987	Hs.9383	NM_015513	ENSG00000163703	CRELD1	AVSD2|CIRRIN	cysteine rich with EGF like domains 1	protein-coding
MACS_peak_50892	chr3	9974357	9974895	+	137.74	NA	promoter-TSS (NM_001031717)	promoter-TSS (NM_001031717)	-892	NM_001077415	78987	Hs.9383	NM_015513	ENSG00000163703	CRELD1	AVSD2|CIRRIN	cysteine rich with EGF like domains 1	protein-coding
MACS_peak_10215	chr10	35415918	35416181	+	135.76	NA	promoter-TSS (NM_181571)	promoter-TSS (NM_181571)	-106	NM_181571	1390	Hs.200250	NM_001881	ENSG00000095794	CREM	CREM-2|ICER|hCREM-2	cAMP responsive element modulator	protein-coding
MACS_peak_21595	chr14	105939186	105939353	+	51.67	NA	promoter-TSS (NR_073082)	promoter-TSS (NR_073082)	-13	NM_001270837	1397	Hs.534309	NM_001312	ENSG00000182809	CRIP2	CRIP|CRP2|ESP1	cysteine rich protein 2	protein-coding
MACS_peak_21597	chr14	105940144	105940315	+	77.55	NA	promoter-TSS (NM_001270841)	promoter-TSS (NM_001270841)	-929	NR_073083	1397	Hs.534309	NM_001312	ENSG00000182809	CRIP2	CRIP|CRP2|ESP1	cysteine rich protein 2	protein-coding
MACS_peak_42082	chr2	46844419	46844620	+	50.13	NA	promoter-TSS (NM_173074)	promoter-TSS (NM_173074)	165	NM_014171	9419	Hs.133998	NM_014171	ENSG00000119878	CRIPT	HSPC139|SSMDF	CXXC repeat containing interactor of PDZ3 domain	protein-coding
MACS_peak_29089	chr16	84853439	84853715	+	82.21	NA	promoter-TSS (NM_031476)	promoter-TSS (NM_031476)	-14	NM_031476	83716	Hs.513779	NM_031476	ENSG00000103196	CRISPLD2	CRISP11|LCRISP2|LGL1	cysteine rich secretory protein LCCL domain containing 2	protein-coding
MACS_peak_29631	chr17	1359526	1359769	+	73.31	NA	promoter-TSS (NM_005206)	promoter-TSS (NM_005206)	-121	NM_005206	1398	Hs.461896	NM_005206	ENSG00000167193	CRK	CRKII|p38	CRK proto-oncogene, adaptor protein	protein-coding
MACS_peak_45359	chr20	5986549	5986764	+	75.57	NA	promoter-TSS (NM_019095)	promoter-TSS (NM_019095)	72	NM_001323562	54675	Hs.743956	NM_019095	ENSG00000088766	CRLS1	C20orf155|CLS|CLS1|GCD10|dJ967N21.6	cardiolipin synthase 1	protein-coding
MACS_peak_28462	chr16	54963191	54963357	+	58.49	NA	promoter-TSS (NR_110454)	promoter-TSS (NR_110454)	-173	NR_034105	643911	Hs.237396	NM_001308963		CRNDE	CRNDEP|LINC00180|NCRNA00180|PNAS-108|lincIRX5	colorectal neoplasia differentially expressed	protein-coding
MACS_peak_1816	chr1	16957662	16958377	+	144.43	NA	promoter-TSS (NR_026752)	promoter-TSS (NR_026752)	-618	NR_026752	84809	Hs.631865	NR_026752	ENSG00000215908	CROCCP2	CROCCL1	CROCC pseudogene 2	pseudo
MACS_peak_51376	chr3	33155228	33155418	+	59.02	NA	promoter-TSS (NM_006371)	promoter-TSS (NM_006371)	-127	NM_006371	10491	Hs.517888	NM_006371	ENSG00000170275	CRTAP	CASP|LEPREL3|OI7|P3H5	cartilage associated protein	protein-coding
MACS_peak_39165	chr19	18794130	18794294	+	59.16	NA	promoter-TSS (NM_015321)	promoter-TSS (NM_015321)	-278	NM_001098482	23373	Hs.371096	NM_015321	ENSG00000105662	CRTC1	MAML2|MECT1|Mam-2|TORC-1|TORC1|WAMTP1	CREB regulated transcription coactivator 1	protein-coding
MACS_peak_6605	chr1	153930906	153931310	+	117.38	NA	promoter-TSS (NM_181715)	promoter-TSS (NM_181715)	-20	NM_181715	200186	Hs.406392	NM_181715	ENSG00000160741	CRTC2	TORC-2|TORC2	CREB regulated transcription coactivator 2	protein-coding
MACS_peak_25030	chr15	91072087	91072317	+	92.53	NA	promoter-TSS (NM_022769)	promoter-TSS (NM_022769)	-953	NM_022769	64784	Hs.567572	NM_022769	ENSG00000140577	CRTC3	TORC-3|TORC3	CREB regulated transcription coactivator 3	protein-coding
MACS_peak_25031	chr15	91072533	91072736	+	63.93	NA	promoter-TSS (NM_022769)	promoter-TSS (NM_022769)	-521	NM_022769	64784	Hs.567572	NM_022769	ENSG00000140577	CRTC3	TORC-3|TORC3	CREB regulated transcription coactivator 3	protein-coding
MACS_peak_25032	chr15	91072762	91072890	+	51.56	NA	promoter-TSS (NM_022769)	promoter-TSS (NM_022769)	-329	NM_022769	64784	Hs.567572	NM_022769	ENSG00000140577	CRTC3	TORC-3|TORC3	CREB regulated transcription coactivator 3	protein-coding
MACS_peak_18548	chr12	107487380	107488064	+	292.91	NA	promoter-TSS (NM_004075)	promoter-TSS (NM_004075)	-395	NM_004075	1407	Hs.151573	NM_004075	ENSG00000008405	CRY1	DSPD|PHLL1	cryptochrome circadian regulator 1	protein-coding
MACS_peak_12760	chr11	45868603	45868992	+	173.89	NA	promoter-TSS (NM_021117)	promoter-TSS (NM_021117)	128	NM_001127457	1408	Hs.532491	NM_021117	ENSG00000121671	CRY2	HCRY2|PHLL2	cryptochrome circadian regulator 2	protein-coding
MACS_peak_48579	chr21	44588463	44588614	+	56.8	NA	promoter-TSS (NM_001314050)	promoter-TSS (NM_001314050)	-580	NM_000394	1409	Hs.184085	NM_000394	ENSG00000160202	CRYAA	CRYA1|CTRCT9|HSPB4	crystallin alpha A	protein-coding
MACS_peak_49026	chr22	25843842	25844088	+	85.23	NA	promoter-TSS (NR_033733)	promoter-TSS (NR_033733)	-89	NR_033734	1416	Hs.571835	NR_033733	ENSG00000100058	CRYBB2P1	CRYB2B	crystallin beta B2 pseudogene 1	pseudo
MACS_peak_27381	chr16	21311927	21312321	+	135.49	NA	promoter-TSS (NR_026675)	promoter-TSS (NR_026675)	-46	NR_026675	400508	Hs.578949	NM_001101368		CRYM-AS1	NCRNA00169	CRYM antisense RNA 1	ncRNA
MACS_peak_48367	chr21	35013694	35013942	+	89.24	NA	promoter-TSS (NM_001331011)	promoter-TSS (NM_001331011)	229	NM_145858	9946	Hs.352671	NM_145311	ENSG00000205758	CRYZL1	4P11|QOH-1	crystallin zeta like 1	protein-coding
MACS_peak_17666	chr12	53574999	53575283	+	82.64	NA	promoter-TSS (NM_015989)	promoter-TSS (NM_015989)	-432	NM_001244705	51380	Hs.279815	NM_015989	ENSG00000139631	CSAD	CSD|PCAP	cysteine sulfinic acid decarboxylase	protein-coding
MACS_peak_17665	chr12	53573721	53574741	+	483.5	NA	promoter-TSS (NM_001004304)	promoter-TSS (NM_001004304)	199	NM_015989	51380	Hs.279815	NM_015989	ENSG00000139631	CSAD	CSD|PCAP	cysteine sulfinic acid decarboxylase	protein-coding
MACS_peak_49693	chr22	41957422	41957997	+	212.07	NA	promoter-TSS (NR_134631)	promoter-TSS (NR_134631)	695	NM_014460	27254	Hs.310893	NM_014460	ENSG00000172346	CSDC2	PIPPIN|dJ347H13.2	cold shock domain containing C2	protein-coding
MACS_peak_46452	chr20	47662643	47663483	+	313.07	NA	promoter-TSS (NR_110624)	promoter-TSS (NR_110624)	214	NM_001362762	1434	Hs.90073	NM_001316	ENSG00000124207	CSE1L	CAS|CSE1|XPO2	chromosome segregation 1 like	protein-coding
MACS_peak_72365	chr8	19615114	19615353	+	94.46	NA	promoter-TSS (NM_001354488)	promoter-TSS (NM_001354488)	307	NR_148898	55790	Hs.613729	NM_018371	ENSG00000147408	CSGALNACT1	CSGalNAcT-1|ChGn|ChGn-1|beta4GalNAcT	chondroitin sulfate N-acetylgalactosaminyltransferase 1	protein-coding
MACS_peak_10284	chr10	43633013	43633227	+	62.93	NA	promoter-TSS (NR_135077)	promoter-TSS (NR_135077)	-773	NR_135077	55454	Hs.657569	NM_018590	ENSG00000169826	CSGALNACT2	CHGN2|ChGn-2|GALNACT-2|GALNACT2|PRO0082|beta4GalNAcT	chondroitin sulfate N-acetylgalactosaminyltransferase 2	protein-coding
MACS_peak_34020	chr17	61974116	61974385	+	68.68	NA	promoter-TSS (NM_001317)	promoter-TSS (NM_001317)	-316	NM_001317	1442	Hs.654390	NM_001317	ENSG00000136488	CSH1	CS-1|CSA|CSMT|GHB3|PL|hCS-1|hCS-A	chorionic somatomammotropin hormone 1	protein-coding
MACS_peak_34021	chr17	61974426	61974587	+	52.45	NA	promoter-TSS (NM_001317)	promoter-TSS (NM_001317)	-572	NM_001317	1442	Hs.654390	NM_001317	ENSG00000136488	CSH1	CS-1|CSA|CSMT|GHB3|PL|hCS-1|hCS-A	chorionic somatomammotropin hormone 1	protein-coding
MACS_peak_63550	chr5	148930240	148931514	+	855.36	NA	promoter-TSS (NM_001271742)	promoter-TSS (NM_001271742)	125	NM_001025105	1452	Hs.529862	NM_001892	ENSG00000113712	CSNK1A1	CK1|CK1a|CKIa|HEL-S-77p|HLCDGP1|PRO2975	casein kinase 1 alpha 1	protein-coding
MACS_peak_49373	chr22	38714538	38714724	+	65.21	NA	promoter-TSS (NM_001894)	promoter-TSS (NM_001894)	-542	NM_001894	1454	Hs.474833	NM_001894	ENSG00000213923	CSNK1E	CKIe|CKIepsilon|HCKIE	casein kinase 1 epsilon	protein-coding
MACS_peak_23140	chr15	64648157	64648777	+	335.69	NA	promoter-TSS (NM_022048)	promoter-TSS (NM_022048)	-95	NM_001329607	53944	Hs.646508	NM_022048	ENSG00000169118	CSNK1G1	CK1gamma1	casein kinase 1 gamma 1	protein-coding
MACS_peak_62470	chr5	122847309	122848143	+	288.71	NA	promoter-TSS (NM_001364147)	promoter-TSS (NM_001364147)	-67	NM_001031812	1456	Hs.129206	NM_004384	ENSG00000151292	CSNK1G3	CKI-gamma 3|CSNK1G3L	casein kinase 1 gamma 3	protein-coding
MACS_peak_45321	chr20	524646	524780	+	55.88	NA	promoter-TSS (NM_177560)	promoter-TSS (NM_177560)	-279	NM_177559	1457	Hs.644056	NM_001895	ENSG00000101266	CSNK2A1	CK2A1|CKII|Cka1|Cka2|OCNDS	casein kinase 2 alpha 1	protein-coding
MACS_peak_24237	chr15	76005212	76005433	+	73.96	NA	promoter-TSS (NM_001897)	promoter-TSS (NM_001897)	-133	NM_001897	1464	Hs.513044	NM_001897	ENSG00000173546	CSPG4	HMW-MAA|MCSP|MCSPG|MEL-CSPG|MSK16|NG2	chondroitin sulfate proteoglycan 4	protein-coding
MACS_peak_73068	chr8	67976361	67976778	+	188.16	NA	promoter-TSS (NM_001364869)	promoter-TSS (NM_001364869)	-34	NM_024790	79848	Hs.370147	NM_024790	ENSG00000104218	CSPP1	CSPP|JBTS21	centrosome and spindle pole associated protein 1	protein-coding
MACS_peak_51488	chr3	39195169	39195319	+	50.35	NA	promoter-TSS (NM_033027)	promoter-TSS (NM_033027)	-162	NM_033027	64651	Hs.370950	NM_033027	ENSG00000144655	CSRNP1	AXUD1|CSRNP-1|FAM130B|TAIP-3|URAX1	cysteine and serine rich nuclear protein 1	protein-coding
MACS_peak_17428	chr12	51477287	51477627	+	191.12	NA	promoter-TSS (NM_030809)	promoter-TSS (NM_030809)	-78	NM_030809	81566	Hs.524425	NM_030809	ENSG00000110925	CSRNP2	C12orf2|C12orf22|FAM130A1|PPP1R72|TAIP-12	cysteine and serine rich nuclear protein 2	protein-coding
MACS_peak_7959	chr1	201475586	201476857	+	475.44	NA	promoter-TSS (NM_001193571)	promoter-TSS (NM_001193571)	30	NM_001193570	1465	Hs.108080	NM_004078	ENSG00000159176	CSRP1	CRP|CRP1|CSRP|CYRP|D1S181E|HEL-141|HEL-S-286	cysteine and glycine rich protein 1	protein-coding
MACS_peak_18242	chr12	77272429	77273022	+	258.59	NA	promoter-TSS (NM_001321)	promoter-TSS (NM_001321)	74	NM_001321	1466	Hs.530904	NM_001321	ENSG00000175183	CSRP2	CRP2|LMO5|SmLIM	cysteine and glycine rich protein 2	protein-coding
MACS_peak_47075	chr20	54967045	54968103	+	551.69	NA	promoter-TSS (NM_001324)	promoter-TSS (NM_001324)	-127	NM_001324	1477	Hs.172865	NM_001324	ENSG00000101138	CSTF1	CstF-50|CstFp50	cleavage stimulation factor subunit 1	protein-coding
MACS_peak_10419	chr10	53459557	53459708	+	63.72	NA	promoter-TSS (NM_015235)	promoter-TSS (NM_015235)	-277	NM_015235	23283	Hs.591358	NM_015235	ENSG00000177613	CSTF2T	CstF-64T	cleavage stimulation factor subunit 2 tau variant	protein-coding
MACS_peak_12541	chr11	33182754	33183374	+	276.49	NA	promoter-TSS (NM_001033505)	promoter-TSS (NM_001033505)	-27	NM_001033505	1479	Hs.44402	NM_001326	ENSG00000176102	CSTF3	CSTF-77	cleavage stimulation factor subunit 3	protein-coding
MACS_peak_12542	chr11	33183936	33184118	+	63.76	NA	promoter-TSS (NM_001033505)	promoter-TSS (NM_001033505)	824	NR_034027	338739	Hs.423476	NR_034027	ENSG00000247151	CSTF3-DT	CSTF3-AS1	CSTF3 divergent transcript	ncRNA
MACS_peak_82892	chrX	115594014	115594165	+	50.14	NA	promoter-TSS (NM_001017978)	promoter-TSS (NM_001017978)	48	NM_001017978	203413	Hs.97892	NM_001017978	ENSG00000204019	CT83	CXorf61|KK-LC-1|KKLC1	cancer/testis antigen 83	protein-coding
MACS_peak_71913	chr7	143454721	143454927	+	71.9	NA	promoter-TSS (NM_178561)	promoter-TSS (NM_178561)	-35	NM_178561	340307	Hs.676333	NM_178561	ENSG00000271321	CTAGE6	CTAGE6P	CTAGE family member 6	protein-coding
MACS_peak_30379	chr17	8151578	8151780	+	59.56	NA	promoter-TSS (NM_025099)	promoter-TSS (NM_025099)	-305	NR_046431	80169	Hs.156055	NM_025099	ENSG00000178971	CTC1	AAF-132|AAF132|C17orf68|CRMCC|tmp494178	CST telomere replication complex component 1	protein-coding
MACS_peak_30156	chr17	7154063	7154467	+	150.83	NA	promoter-TSS (NM_203415)	promoter-TSS (NM_203415)	788	NM_001143775	23399	Hs.513913	NM_015343	ENSG00000175826	CTDNEP1	DULLARD|HSA011916|NET56	CTD nuclear envelope phosphatase 1	protein-coding
MACS_peak_44668	chr2	219264431	219264668	+	124.38	NA	promoter-TSS (NM_182642)	promoter-TSS (NM_182642)	-42	NM_021198	58190	Hs.444468	NM_021198	ENSG00000144579	CTDSP1	NIF3|NLI-IF|NLIIF|SCP1	CTD small phosphatase 1	protein-coding
MACS_peak_44667	chr2	219262139	219262950	+	321.99	NA	promoter-TSS (NM_001206878)	promoter-TSS (NM_001206878)	-412	NM_001206878	58190	Hs.444468	NM_021198	ENSG00000144579	CTDSP1	NIF3|NLI-IF|NLIIF|SCP1	CTD small phosphatase 1	protein-coding
MACS_peak_18060	chr12	58240500	58240642	+	53.08	NA	promoter-TSS (NM_005730)	promoter-TSS (NM_005730)	-59	NM_005730	10106	Hs.524530	NM_005730	ENSG00000175215	CTDSP2	OS4|PSR2|SCP2	CTD small phosphatase 2	protein-coding
MACS_peak_22615	chr15	44718864	44720106	+	573.03	NA	promoter-TSS (NM_016396)	promoter-TSS (NM_016396)	-342	NM_016396	51496	Hs.497967	NM_016396	ENSG00000137770	CTDSPL2	HSPC058|HSPC129	CTD small phosphatase like 2	protein-coding
MACS_peak_51522	chr3	41240626	41241280	+	297.75	NA	promoter-TSS (NM_001098209)	promoter-TSS (NM_001098209)	-43	NM_001330729	1499	Hs.476018	NM_001904	ENSG00000168036	CTNNB1	CTNNB|EVR7|MRD19|NEDSDV|armadillo	catenin beta 1	protein-coding
MACS_peak_1145	chr1	9970613	9971062	+	154.87	NA	promoter-TSS (NM_020248)	promoter-TSS (NM_020248)	-510	NM_001012329	56998	Hs.463759	NM_020248	ENSG00000178585	CTNNBIP1	ICAT	catenin beta interacting protein 1	protein-coding
MACS_peak_29858	chr17	3539869	3540149	+	114.81	NA	promoter-TSS (NM_004937)	promoter-TSS (NM_004937)	-45	NM_004937	1497	Hs.187667	NM_004937	ENSG00000040531	CTNS	CTNS-LSB|PQLC4|SLC66A4	cystinosin, lysosomal cystine transporter	protein-coding
MACS_peak_29857	chr17	3539654	3539861	+	74.76	NA	promoter-TSS (NM_004937)	promoter-TSS (NM_004937)	-5	NM_001031681	1497	Hs.187667	NM_004937	ENSG00000040531	CTNS	CTNS-LSB|PQLC4|SLC66A4	cystinosin, lysosomal cystine transporter	protein-coding
MACS_peak_3895	chr1	41445325	41445547	+	72.93	NA	promoter-TSS (NR_125440)	promoter-TSS (NR_125440)	68	NM_001905	1503	Hs.473087	NM_001905	ENSG00000171793	CTPS1	CTPS|GATD5|IMD24	CTP synthase 1	protein-coding
MACS_peak_12178	chr11	10772479	10773308	+	343.02	NA	promoter-TSS (NM_014633)	promoter-TSS (NM_014633)	100	NM_014633	9646	Hs.725151	NM_014633	ENSG00000198730	CTR9	SH2BP1|TSBP|p150|p150TSP	CTR9 homolog, Paf1/RNA polymerase II complex component	protein-coding
MACS_peak_46279	chr20	44518771	44518942	+	55.95	NA	promoter-TSS (NR_133656)	promoter-TSS (NR_133656)	73	NM_001167594	5476	Hs.609336	NM_000308	ENSG00000064601	CTSA	GLB2|GSL|NGBE|PPCA|PPGB	cathepsin A	protein-coding
MACS_peak_72280	chr8	11726263	11726429	+	58.49	NA	promoter-TSS (NM_147780)	promoter-TSS (NM_147780)	-750	NM_147782	1508	Hs.520898	NM_001908	ENSG00000164733	CTSB	APPS|CPSB|RECEUP	cathepsin B	protein-coding
MACS_peak_15698	chr11	88070788	88071039	+	111.16	NA	promoter-TSS (NM_148170)	promoter-TSS (NM_148170)	-9	NM_001814	1075	Hs.128065	NM_001814	ENSG00000109861	CTSC	CPPI|DPP-I|DPP1|DPPI|HMS|JP|JPD|PALS|PDON1|PLS	cathepsin C	protein-coding
MACS_peak_15699	chr11	88071599	88071806	+	58.74	NA	promoter-TSS (NM_148170)	promoter-TSS (NM_148170)	-798	NM_001814	1075	Hs.128065	NM_001814	ENSG00000109861	CTSC	CPPI|DPP-I|DPP1|DPPI|HMS|JP|JPD|PALS|PDON1|PLS	cathepsin C	protein-coding
MACS_peak_14469	chr11	66335978	66336208	+	95.18	NA	promoter-TSS (NM_003793)	promoter-TSS (NM_003793)	-16	NM_003793	8722	Hs.11590	NM_003793	ENSG00000174080	CTSF	CATSF|CLN13	cathepsin F	protein-coding
MACS_peak_47281	chr20	57583159	57583444	+	85.07	NA	promoter-TSS (NM_001336)	promoter-TSS (NM_001336)	-992	NM_001336	1522	Hs.252549	NM_001336	ENSG00000101160	CTSZ	CTSX	cathepsin Z	protein-coding
MACS_peak_47280	chr20	57582838	57583092	+	65.7	NA	promoter-TSS (NM_001336)	promoter-TSS (NM_001336)	-656	NM_001336	1522	Hs.252549	NM_001336	ENSG00000101160	CTSZ	CTSX	cathepsin Z	protein-coding
MACS_peak_47279	chr20	57582235	57582386	+	63.81	NA	promoter-TSS (NM_001336)	promoter-TSS (NM_001336)	-1	NM_001336	1522	Hs.252549	NM_001336	ENSG00000101160	CTSZ	CTSX	cathepsin Z	protein-coding
MACS_peak_15142	chr11	70244278	70244779	+	137.58	NA	promoter-TSS (NM_005231)	promoter-TSS (NM_005231)	-84	NM_138565	2017	Hs.596164	NM_005231	ENSG00000085733	CTTN	EMS1	cortactin	protein-coding
MACS_peak_40980	chr19	51611526	51611917	+	194.91	NA	promoter-TSS (NM_145232)	promoter-TSS (NM_145232)	-55	NM_145232	90353	Hs.148425	NM_145232	ENSG00000142544	CTU1	ATPBD3|NCS6	cytosolic thiouridylase subunit 1	protein-coding
MACS_peak_40981	chr19	51612005	51612195	+	62.9	NA	promoter-TSS (NM_145232)	promoter-TSS (NM_145232)	-434	NM_145232	90353	Hs.148425	NM_145232	ENSG00000142544	CTU1	ATPBD3|NCS6	cytosolic thiouridylase subunit 1	protein-coding
MACS_peak_29343	chr16	88773356	88773608	+	83.27	NA	promoter-TSS (NM_001171815)	promoter-TSS (NM_001171815)	571	NM_001318507	348180	Hs.592074	NM_001012759	ENSG00000174177	CTU2	C16orf84|MFRG|NCS2|UPF0432	cytosolic thiouridylase subunit 2	protein-coding
MACS_peak_29342	chr16	88772793	88773011	+	74.58	NA	promoter-TSS (NM_001012759)	promoter-TSS (NM_001012759)	-9	NM_001318513	348180	Hs.592074	NM_001012759	ENSG00000174177	CTU2	C16orf84|MFRG|NCS2|UPF0432	cytosolic thiouridylase subunit 2	protein-coding
MACS_peak_11285	chr10	104192279	104192428	+	57.49	NA	promoter-TSS (NM_024040)	promoter-TSS (NM_024040)	-22	NM_024040	79004	Hs.500874	NM_024040	ENSG00000107874	CUEDC2	C10orf66|bA18I14.5	CUE domain containing 2	protein-coding
MACS_peak_44935	chr2	225450228	225450697	+	165.32	NA	promoter-TSS (NM_003590)	promoter-TSS (NM_003590)	-348	NM_001257197	8452	Hs.372286	NM_003590	ENSG00000036257	CUL3	CUL-3|PHA2E	cullin 3	protein-coding
MACS_peak_82936	chrX	119694843	119695417	+	201.27	NA	promoter-TSS (NM_001079872)	promoter-TSS (NM_001079872)	268	NM_001330624	8450	Hs.102914	NM_003588	ENSG00000158290	CUL4B	CUL-4B|MRXHF2|MRXS15|MRXSC|SFM2	cullin 4B	protein-coding
MACS_peak_15869	chr11	107879496	107879666	+	70.79	NA	promoter-TSS (NM_003478)	promoter-TSS (NM_003478)	-43	NM_003478	8065	Hs.440320	NM_003478	ENSG00000166266	CUL5	CUL-5|VACM-1|VACM1	cullin 5	protein-coding
MACS_peak_66109	chr6	43021409	43021810	+	160.36	NA	promoter-TSS (NM_014780)	promoter-TSS (NM_014780)	74	NM_014780	9820	Hs.520136	NM_014780	ENSG00000044090	CUL7	3M1|CUL-7|KIAA0076|dJ20C7.5	cullin 7	protein-coding
MACS_peak_66124	chr6	43149850	43150109	+	87.68	NA	promoter-TSS (NM_015089)	promoter-TSS (NM_015089)	45	NM_015089	23113	Hs.485434	NM_015089	ENSG00000112659	CUL9	H7AP1|PARC	cullin 9	protein-coding
MACS_peak_65796	chr6	33385455	33386546	+	543.35	NA	promoter-TSS (NM_001014838).2	promoter-TSS (NM_001014838).2	65	NM_001014433	51596	Hs.520070	NM_015921	ENSG00000112514	CUTA	ACHAP|C6orf82	cutA divalent cation tolerance homolog	protein-coding
MACS_peak_77149	chr9	123604815	123605904	+	514.94	NA	promoter-TSS (NM_001270427)	promoter-TSS (NM_001270427)	6	NR_152406	253039	Hs.594170	NR_024408	ENSG00000226752	CUTALP	PSMD5-AS1	cutA divalent cation tolerance homolog-like, pseudogene	pseudo
MACS_peak_11164	chr10	101491557	101492254	+	363.89	NA	promoter-TSS (NM_015960)	promoter-TSS (NM_015960)	-86	NM_015960	51076	Hs.16606	NM_015960	ENSG00000119929	CUTC	CGI-32	cutC copper transporter	protein-coding
MACS_peak_70959	chr7	101460849	101461159	+	103.8	NA	promoter-TSS (NM_181552)	promoter-TSS (NM_181552)	98	NM_181552	1523	Hs.191482	NM_001913	ENSG00000257923	CUX1	CASP|CDP|CDP/Cut|CDP1|COY1|CUTL1|CUX|Clox|Cux/CDP|GDDI|GOLIM6|Nbla10317|p100|p110|p200|p75	cut like homeobox 1	protein-coding
MACS_peak_70958	chr7	101458179	101458411	+	79.57	NA	promoter-TSS (NM_001202546)	promoter-TSS (NM_001202546)	-992	NM_001202543	1523	Hs.191482	NM_001913	ENSG00000257923	CUX1	CASP|CDP|CDP/Cut|CDP1|COY1|CUTL1|CUX|Clox|Cux/CDP|GDDI|GOLIM6|Nbla10317|p100|p110|p200|p75	cut like homeobox 1	protein-coding
MACS_peak_15777	chr11	94706463	94707002	+	194.39	NA	promoter-TSS (NM_018039)	promoter-TSS (NM_018039)	-12	NM_016403	51503	Hs.503597	NM_016403	ENSG00000150316	CWC15	AD002|C11orf5|Cwf15|HSPC148|ORF5	CWC15 spliceosome associated protein homolog	protein-coding
MACS_peak_15776	chr11	94706265	94706425	+	54.28	NA	promoter-TSS (NM_018039)	promoter-TSS (NM_018039)	375	NM_016403	51503	Hs.503597	NM_016403	ENSG00000150316	CWC15	AD002|C11orf5|Cwf15|HSPC148|ORF5	CWC15 spliceosome associated protein homolog	protein-coding
MACS_peak_31948	chr17	36981424	36982144	+	362.37	NA	promoter-TSS (NR_039880)	promoter-TSS (NR_039880)	-181	NR_073428	54883	Hs.406223	NM_017748	ENSG00000273559	CWC25	CCDC49	CWC25 spliceosome associated protein homolog	protein-coding
MACS_peak_31947	chr17	36981109	36981406	+	108.69	NA	promoter-TSS (NR_039880)	promoter-TSS (NR_039880)	317	NM_017748	54883	Hs.406223	NM_017748	ENSG00000273559	CWC25	CCDC49	CWC25 spliceosome associated protein homolog	protein-coding
MACS_peak_61372	chr5	64064818	64065079	+	100.4	NA	promoter-TSS (NM_173829)	promoter-TSS (NM_173829)	191	NM_001364478	10283	Hs.371372	NM_005869	ENSG00000153015	CWC27	NY-CO-10|RPSKA|SDCCAG-10|SDCCAG10	CWC27 spliceosome associated cyclophilin	protein-coding
MACS_peak_11179	chr10	102027289	102027460	+	56.88	NA	promoter-TSS (NM_001303404)	promoter-TSS (NM_001303404)	21	NM_001303404	55280	Hs.215502	NM_018294	ENSG00000095485	CWF19L1	C19L1|SCAR17|hDrn1	CWF19 like cell cycle control factor 1	protein-coding
MACS_peak_48249	chr21	18885009	18885173	+	65.98	NA	promoter-TSS (NM_001338)	promoter-TSS (NM_001338)	-133	NM_001207066	1525	Hs.627078	NM_001338	ENSG00000154639	CXADR	CAR|CAR4/6|HCAR	CXADR Ig-like cell adhesion molecule	protein-coding
MACS_peak_55053	chr4	74964910	74965228	+	149.79	NA	promoter-TSS (NM_002089)	promoter-TSS (NM_002089)	-157	NM_002089	2920	Hs.75765	NM_002089	ENSG00000081041	CXCL2	CINC-2a|GRO2|GROb|MGSA-b|MIP-2a|MIP2|MIP2A|SCYB2	C-X-C motif chemokine ligand 2	protein-coding
MACS_peak_43500	chr2	136873907	136874079	+	56.56	NA	promoter-TSS (NM_001008540)	promoter-TSS (NM_001008540)	-188	NM_001008540	7852	Hs.593413	NM_003467	ENSG00000121966	CXCR4	CD184|D2S201E|FB22|HM89|HSY3RR|LAP-3|LAP3|LCR1|LESTR|NPY3R|NPYR|NPYRL|NPYY3R|WHIM|WHIMS	C-X-C motif chemokine receptor 4	protein-coding
MACS_peak_55314	chr4	105416313	105416637	+	119.15	NA	promoter-TSS (NM_025212)	promoter-TSS (NM_025212)	-424	NR_132741	80319	Hs.12248	NM_025212	ENSG00000168772	CXXC4	IDAX	CXXC finger protein 4	protein-coding
MACS_peak_63201	chr5	139038760	139039111	+	78	NA	promoter-TSS (NM_001317206)	promoter-TSS (NM_001317206)	-205	NM_001317206	51523	Hs.189119	NM_016463	ENSG00000171604	CXXC5	CF5|HSPC195|RINF|WID	CXXC finger protein 5	protein-coding
MACS_peak_33961	chr17	61524091	61524275	+	72.68	NA	promoter-TSS (NM_001017916)	promoter-TSS (NM_001017916)	-516	NM_001915	1534	Hs.355264	NM_001915	ENSG00000008283	CYB561	CYB561A1|FRRS2|ORTHYP2	cytochrome b561	protein-coding
MACS_peak_13380	chr11	61128900	61130297	+	506.06	NA	promoter-TSS (NM_001330281)	promoter-TSS (NM_001330281)	157	NM_001161454	220002	Hs.22546	NM_153611	ENSG00000162144	CYB561A3	CYBASC3|LCYTB	cytochrome b561 family member A3	protein-coding
MACS_peak_52192	chr3	50401759	50401959	+	65.29	NA	promoter-TSS (NR_111913)	promoter-TSS (NR_111913)	-935	NR_111913	11068	Hs.149443	NM_007022	ENSG00000114395	CYB561D2	101F6|TSP10|XXcos-LUCA11.4	cytochrome b561 family member D2	protein-coding
MACS_peak_52184	chr3	50387003	50387270	+	71.15	NA	promoter-TSS (NR_111912)	promoter-TSS (NR_111912)	-990	NR_111912	11068	Hs.149443	NM_007022	ENSG00000114395	CYB561D2	101F6|TSP10|XXcos-LUCA11.4	cytochrome b561 family member D2	protein-coding
MACS_peak_52185	chr3	50387877	50388927	+	497.99	NA	promoter-TSS (NM_006545)	promoter-TSS (NM_006545)	109	NM_001291284	11068	Hs.149443	NM_007022	ENSG00000114395	CYB561D2	101F6|TSP10|XXcos-LUCA11.4	cytochrome b561 family member D2	protein-coding
MACS_peak_36627	chr18	71959459	71959768	+	110.73	NA	promoter-TSS (NM_001914)	promoter-TSS (NM_001914)	-415	NM_001914	1528	Hs.465413	NM_001914	ENSG00000166347	CYB5A	CYB5|MCB5|METAG	cytochrome b5 type A	protein-coding
MACS_peak_28783	chr16	69458152	69458616	+	120.13	NA	promoter-TSS (NM_030579)	promoter-TSS (NM_030579)	-114	NM_030579	80777	Hs.461131	NM_030579	ENSG00000103018	CYB5B	CYB5-M|CYPB5M|OMB5	cytochrome b5 type B	protein-coding
MACS_peak_8135	chr1	202936515	202936977	+	157.96	NA	promoter-TSS (NM_016243)	promoter-TSS (NM_016243)	-361	NM_016243	51706	Hs.334832	NM_016243	ENSG00000159348	CYB5R1	B5R.1|B5R1|B5R2|NQO3A2|humb5R2	cytochrome b5 reductase 1	protein-coding
MACS_peak_12007	chr11	7695652	7695861	+	51.64	NA	promoter-TSS (NM_001302826)	promoter-TSS (NM_001302826)	-258	NM_001302826	51700	Hs.414362	NM_016229	ENSG00000166394	CYB5R2	B5R.2	cytochrome b5 reductase 2	protein-coding
MACS_peak_49879	chr22	43042978	43043255	+	89.97	NA	promoter-TSS (NM_007326)	promoter-TSS (NM_007326)	-121	NM_001129819	1727	Hs.561064	NM_000398	ENSG00000100243	CYB5R3	B5R|DIA1	cytochrome b5 reductase 3	protein-coding
MACS_peak_49881	chr22	43045597	43046052	+	176.16	NA	promoter-TSS (NM_000398)	promoter-TSS (NM_000398)	-426	NM_000398	1727	Hs.561064	NM_000398	ENSG00000100243	CYB5R3	B5R|DIA1	cytochrome b5 reductase 3	protein-coding
MACS_peak_49882	chr22	43046213	43046381	+	53.39	NA	promoter-TSS (NM_000398)	promoter-TSS (NM_000398)	-899	NM_000398	1727	Hs.561064	NM_000398	ENSG00000100243	CYB5R3	B5R|DIA1	cytochrome b5 reductase 3	protein-coding
MACS_peak_66454	chr6	84569219	84569673	+	127.87	NA	promoter-TSS (NM_016230)	promoter-TSS (NM_016230)	38	NM_016230	51167	Hs.5741	NM_016230	ENSG00000065615	CYB5R4	NCB5OR|cb5/cb5R|dJ676J13.1	cytochrome b5 reductase 4	protein-coding
MACS_peak_35838	chr17	80408249	80408515	+	127.01	NA	promoter-TSS (NM_001193655)	promoter-TSS (NM_001193655)	246	NM_001193653	79415	Hs.163113	NM_001033046	ENSG00000178927	CYBC1	C17orf62|Eros	cytochrome b-245 chaperone 1	protein-coding
MACS_peak_35839	chr17	80408565	80408849	+	108.45	NA	promoter-TSS (NM_001100408)	promoter-TSS (NM_001100408)	0	NR_036517	79415	Hs.163113	NM_001033046	ENSG00000178927	CYBC1	C17orf62|Eros	cytochrome b-245 chaperone 1	protein-coding
MACS_peak_75021	chr8	145149535	145149773	+	59.07	NA	promoter-TSS (NM_001916)	promoter-TSS (NM_001916)	-325	NM_001916	1537	Hs.289271	NM_001916	ENSG00000179091	CYC1	MC3DN6|UQCR4	cytochrome c1	protein-coding
MACS_peak_68531	chr7	25164788	25165349	+	457.74	NA	promoter-TSS (NM_018947)	promoter-TSS (NM_018947)	-88	NM_018947	54205	Hs.437060	NM_018947	ENSG00000172115	CYCS	CYC|HCS|THC4	cytochrome c, somatic	protein-coding
MACS_peak_75207	chr8	145690428	145690813	+	118.96	NA	promoter-TSS (NM_138496)	promoter-TSS (NM_138496)	-202	NM_138496	50626	Hs.459379	NM_032687	ENSG00000187954	CYHR1	CHRP	cysteine and histidine rich 1	protein-coding
MACS_peak_75203	chr8	145688237	145688680	+	136.27	NA	promoter-TSS (NM_001330618)	promoter-TSS (NM_001330618)	-224	NM_001330618	50626	Hs.459379	NM_032687	ENSG00000187954	CYHR1	CHRP	cysteine and histidine rich 1	protein-coding
MACS_peak_75204	chr8	145688735	145689013	+	83.48	NA	promoter-TSS (NM_001330618)	promoter-TSS (NM_001330618)	-640	NM_001330618	50626	Hs.459379	NM_032687	ENSG00000187954	CYHR1	CHRP	cysteine and histidine rich 1	protein-coding
MACS_peak_23969	chr15	74658850	74659207	+	108.84	NA	promoter-TSS (NM_001099773)	promoter-TSS (NM_001099773)	-493	NM_001099773	1583	Hs.303980	NM_000781	ENSG00000140459	CYP11A1	CYP11A|CYPXIA1|P450SCC	cytochrome P450 family 11 subfamily A member 1	protein-coding
MACS_peak_41898	chr2	38303450	38303815	+	125.27	NA	promoter-TSS (NM_000104)	promoter-TSS (NM_000104)	-309	NM_000104	1545	Hs.154654	NM_000104	ENSG00000138061	CYP1B1	ASGD6|CP1B|CYPIB1|GLC3A|P4501B1	cytochrome P450 family 1 subfamily B member 1	protein-coding
MACS_peak_41899	chr2	38303852	38304121	+	84.36	NA	promoter-TSS (NM_000104)	promoter-TSS (NM_000104)	-663	NM_000104	1545	Hs.154654	NM_000104	ENSG00000138061	CYP1B1	ASGD6|CP1B|CYPIB1|GLC3A|P4501B1	cytochrome P450 family 1 subfamily B member 1	protein-coding
MACS_peak_47057	chr20	52790812	52791092	+	83.13	NA	promoter-TSS (NM_001128915)	promoter-TSS (NM_001128915)	-427	NM_000782	1591	Hs.89663	NM_000782	ENSG00000019186	CYP24A1	CP24|CYP24|HCAI|HCINF1|P450-CC24	cytochrome P450 family 24 subfamily A member 1	protein-coding
MACS_peak_47058	chr20	52791289	52791466	+	58.11	NA	promoter-TSS (NM_001128915)	promoter-TSS (NM_001128915)	-852	NM_000782	1591	Hs.89663	NM_000782	ENSG00000019186	CYP24A1	CP24|CYP24|HCAI|HCINF1|P450-CC24	cytochrome P450 family 24 subfamily A member 1	protein-coding
MACS_peak_42507	chr2	72375288	72375507	+	80.94	NA	promoter-TSS (NM_001277742)	promoter-TSS (NM_001277742)	-406	NM_001277742	56603	Hs.91546	NM_019885	ENSG00000003137	CYP26B1	CYP26A2|P450RAI-2|P450RAI2|RHFCA	cytochrome P450 family 26 subfamily B member 1	protein-coding
MACS_peak_18052	chr12	58161757	58161946	+	57.76	NA	promoter-TSS (NM_000785)	promoter-TSS (NM_000785)	-990	NM_000785	1594	Hs.524528	NM_000785	ENSG00000111012	CYP27B1	CP2B|CYP1|CYP1alpha|CYP27B|P450c1|PDDR|VDD1|VDDR|VDDRI|VDR	cytochrome P450 family 27 subfamily B member 1	protein-coding
MACS_peak_39882	chr19	41396408	41396571	+	50.49	NA	promoter-TSS (NR_040249)	promoter-TSS (NR_040249)	-242	NR_040249	22952	Hs.738699	NR_040249	ENSG00000130612	CYP2G1P	CYP2G1|CYP2G2P|CYP2GP1	cytochrome P450 family 2 subfamily G member 1, pseudogene	pseudo
MACS_peak_39874	chr19	41316822	41317273	+	176.73	NA	promoter-TSS (NR_144551)	promoter-TSS (NR_144551)	-42	NR_144551	171523	Hs.656713	NR_144551	ENSG00000233622	CYP2T1P	CYP2T2P	cytochrome P450 family 2 subfamily T member 1, pseudogene	pseudo
MACS_peak_55338	chr4	108852489	108852755	+	98.6	NA	promoter-TSS (NM_183075)	promoter-TSS (NM_183075)	-83	NM_183075	113612	Hs.109087	NM_183075	ENSG00000155016	CYP2U1	P450TEC|SPG49|SPG56	cytochrome P450 family 2 subfamily U member 1	protein-coding
MACS_peak_55337	chr4	108852133	108852320	+	58.37	NA	promoter-TSS (NM_183075)	promoter-TSS (NM_183075)	-479	NM_183075	113612	Hs.109087	NM_183075	ENSG00000155016	CYP2U1	P450TEC|SPG49|SPG56	cytochrome P450 family 2 subfamily U member 1	protein-coding
MACS_peak_21291	chr14	100150129	100150353	+	86.02	NA	promoter-TSS (NM_006668)	promoter-TSS (NM_006668)	-394	NM_006668	10858	Hs.25121	NM_006668	ENSG00000036530	CYP46A1	CP46|CYP46	cytochrome P450 family 46 subfamily A member 1	protein-coding
MACS_peak_43413	chr2	131437196	131437367	+	56.88	NA	promoter-TSS (NR_023391)	promoter-TSS (NR_023391)	-342	NR_023391	100132708	Hs.734862	NM_032248	ENSG00000214081	CYP4F30P	C2orf14	cytochrome P450 family 4 subfamily F member 30, pseudogene	pseudo
MACS_peak_70440	chr7	91763320	91763654	+	160.19	NA	promoter-TSS (NR_122109)	promoter-TSS (NR_122109)	304	NM_000786	1595	Hs.417077	NM_000786	ENSG00000001630	CYP51A1	CP51|CYP51|CYPL1|LDM|P450-14DM|P450L1	cytochrome P450 family 51 subfamily A member 1	protein-coding
MACS_peak_70441	chr7	91763692	91764380	+	387.96	NA	promoter-TSS (NM_000786)	promoter-TSS (NM_000786)	23	NM_001146152	1595	Hs.417077	NM_000786	ENSG00000001630	CYP51A1	CP51|CYP51|CYPL1|LDM|P450-14DM|P450L1	cytochrome P450 family 51 subfamily A member 1	protein-coding
MACS_peak_71785	chr7	134855089	134855730	+	303.16	NA	promoter-TSS (NM_001363329)	promoter-TSS (NM_001363329)	50	NM_001363329	78996	Hs.643113	NM_024033	ENSG00000122783	CYREN	C7orf49|MRI|MRI-2	cell cycle regulator of NHEJ	protein-coding
MACS_peak_81795	chr9	140119021	140120006	+	256.17	NA	promoter-TSS (NM_199001)	promoter-TSS (NM_199001)	-113	NM_199001	375791	Hs.495540	NM_199001	ENSG00000197191	CYSRT1	C9orf169	cysteine rich tail 1	protein-coding
MACS_peak_81794	chr9	140118651	140118881	+	66.6	NA	promoter-TSS (NM_199001)	promoter-TSS (NM_199001)	-860	NM_199001	375791	Hs.495540	NM_199001	ENSG00000197191	CYSRT1	C9orf169	cysteine rich tail 1	protein-coding
MACS_peak_63265	chr5	139554479	139554902	+	166.24	NA	promoter-TSS (NM_032412)	promoter-TSS (NM_032412)	-83	NM_032412	84418	Hs.529798	NM_032412	ENSG00000120306	CYSTM1	C5orf32|ORF1-FL49	cysteine rich transmembrane module containing 1	protein-coding
MACS_peak_35079	chr17	76779329	76779493	+	52.2	NA	promoter-TSS (NM_004762)	promoter-TSS (NM_004762)	-987	NM_004762	9267	Hs.191215	NM_004762	ENSG00000108669	CYTH1	B2-1|CYTOHESIN-1|D17S811E|PSCD1|SEC7	cytohesin 1	protein-coding
MACS_peak_35078	chr17	76778587	76778872	+	92.44	NA	promoter-TSS (NM_001365039)	promoter-TSS (NM_001365039)	-305	NM_004762	9267	Hs.191215	NM_004762	ENSG00000108669	CYTH1	B2-1|CYTOHESIN-1|D17S811E|PSCD1|SEC7	cytohesin 1	protein-coding
MACS_peak_40661	chr19	48972069	48972928	+	353.09	NA	promoter-TSS (NM_004228)	promoter-TSS (NM_004228)	33	NM_017457	9266	Hs.144011	NM_004228	ENSG00000105443	CYTH2	ARNO|CTS18|CTS18.1|PSCD2|PSCD2L|SEC7L|Sec7p-L|Sec7p-like|cytohesin-2	cytohesin 2	protein-coding
MACS_peak_68176	chr7	6312480	6312661	+	66	NA	promoter-TSS (NM_001367580)	promoter-TSS (NM_001367580)	-315	NM_001367581	9265	Hs.487479	NM_004227	ENSG00000008256	CYTH3	ARNO3|GRP1|PSCD3|cytohesin-3	cytohesin 3	protein-coding
[truncated: 7,362 more rows]
